# Supplementary material for: A k-mer based approach for virus classification identifies coronavirus infections and viral associations in human and plant microbiomes
Source: Research Square preprint supplement (doi:10.21203/rs.3.rs-52940/v2), 2020-10-13
Supplement: Supplementary file 1 [file ea650b2a72895cda1d522190.xlsx]

## Sheet: Filtered_Scaled
Name	SRR9292593	SRR9292614	SRR9292604	SRR9292605	SRR9292618	SRR9292598	SRR9292622	SRR9292629	SRR9292631	SRR9292594	SRR9292623	SRR9292611	SRR9292628	SRR9292609	SRR9292619	SRR9292599	SRR9292627	SRR9292617	SRR9292597	SRR9292610	SRR9292630	SRR9292595	SRR9292596	SRR9292608	SRR9292626	SRR9292612	SRR9292607	SRR9292620	SRR9292616	SRR9292615	SRR9292624	SRR9292602	SRR9292632	SRR9292603	SRR9292625	SRR9292633	SRR9292613	SRR9292600	SRR9292621	SRR9292606	SRR9292601
Thraustotheca_clavata	9.55271	24.4335	9.35004	16.0398	10.4177	21.8839	12.9076	14.9351	3.01408	3.60313	24.018	2.59848	4.65187	8.83308	8.25315	13.7642	7.52187	7.48121	9.16878	5.43305	5.02149	21.7653	13.9166	17.1996	8.03332	5	6.04986	23.1161	8.06271	6.90531	5.77646	4.56551	7.51619	3.57509	10.2559	20.7934	16.9045	7.15877	34.6739	11.8617	3.12954
Colobus_angolensis	53133.1	59909.1	50611.8	53637.2	55454.6	57973.6	56039.7	54511.5	48337.6	56620.5	52531.4	52536.1	55962.8	49431	51326.3	54735.1	53503.1	53833.7	50756.7	52650.6	51247.4	52026.6	49587.5	59419.5	65174.3	50390	48464.4	50085.8	55031	56649.5	52177.3	52225.8	54079	48796.4	55466	51196.1	61837.8	48861	53654	46408.9	48435.9
Hydroides_elegans	58.2716	83.6378	57.1391	54.1345	93.7596	61.2748	54.212	87.9512	36.9225	81.0704	106.747	40.2764	59.2056	46.3736	70.5269	55.0567	84.6211	52.3684	48.3445	38.0314	33.1419	98.3192	102.983	77.8075	60.6962	55	96.7978	158.923	52.4076	82.8637	42.6014	71.2219	129.278	55.4139	52.3052	68.051	166.444	77.951	71.5849	109.721	80.3249
Clogmia_albipunctata	32.4792	42.2888	18.7001	22.0548	39.5874	13.1303	20.6522	44.8053	12.0563	16.2141	40.03	12.9924	20.2991	13.2496	19.5074	18.1108	30.0875	22.4436	14.1699	20.6456	20.086	49.5349	43.8372	22.9327	32.1333	12	31.2576	60.6797	20.1568	29.3476	13.7191	31.9586	51.1101	19.663	16.4095	22.6837	65.0171	31.8168	23.4888	32.6197	22.95
Nakaseomyces_bacillisporus	1.91054	16.9155	12.4667	0	13.543	4.37677	6.88406	8.29728	4.52112	2.70235	17.3463	1.29924	2.53738	14.3537	12.0046	2.89772	1.88047	6.41246	15.0035	18.4724	4.0172	9.75687	11.1333	2.45708	15.174	10	18.1496	20.2266	2.01568	8.63164	3.61029	4.56551	4.50971	3.57509	2.05118	7.56122	9.1024	0.795419	6.71108	4.94238	4.17272
Megaselia_scalaris	20.0607	58.2645	9.35004	32.0797	46.8798	26.2606	36.1413	39.8269	21.8521	27.9243	49.3703	12.9924	22.4135	15.4579	18.7572	25.3551	33.8484	23.5124	13.3364	19.559	24.1032	70.5497	43.1414	44.2274	24.9925	17	31.2576	83.7958	25.196	37.9792	10.8309	19.1751	33.0712	21.4505	17.4351	27.4094	63.7168	25.4534	35.7924	29.6543	30.2522
Clavaria_fumosa	7.64217	5.6385	10.3889	1.00249	15.6266	21.8839	6.02355	33.1891	5.27465	23.4203	21.3493	16.8901	13.1098	17.6662	13.5051	18.1108	18.8047	16.0312	21.6717	13.0393	0	6.00423	3.47914	4.09513	30.3481	7	14.1163	1.92634	16.1254	13.8106	6.49851	5.47861	19.5421	2.68132	12.3071	5.67091	28.6075	14.3175	14.5407	14.8271	1.04318
Cladosiphon_okamuranus	34.3898	46.0478	37.4002	43.1071	58.3393	55.8039	17.2101	74.6755	18.0845	71.1618	37.3613	62.3635	57.0911	27.6034	49.5189	49.9857	22.5656	52.3684	50.8451	24.992	28.1204	41.2791	45.9247	34.3991	73.1924	54	40.3324	67.4219	49.3841	50.0635	26.7161	42.0027	21.0453	16.0879	62.5611	33.0803	74.1195	48.5205	65.9923	35.5851	16.6909
Kwoniella_bestiolae	9.55271	13.1565	14.5445	21.0523	11.4595	14.2245	18.0707	16.5946	20.3451	10.8094	24.018	15.5909	14.3785	9.93721	16.5063	12.3153	26.3266	22.4436	11.6694	10.8661	10.043	15.7611	18.0916	19.6566	12.4963	15	15.1247	12.5212	12.0941	12.0843	18.0514	12.7834	22.5486	22.3443	19.4862	21.7385	19.5051	7.15877	8.94811	8.89628	11.475
Melampsora_abietis-canadensis	3.82109	6.57825	3.11668	11.0274	12.5013	5.47097	4.30254	9.95674	2.26056	9.00782	20.015	0	2.96028	4.41654	6.00229	3.62215	13.1633	5.34372	5.83468	1.08661	4.0172	10.5074	18.7874	4.91416	8.03332	2	6.04986	5.77902	5.03919	1.72633	5.0544	6.39171	6.01295	1.78755	4.10237	6.61607	13.0034	2.38626	15.6592	6.91933	2.08636
Entomophthora_muscae	26575.6	41322.7	30288.9	29502.3	33982.6	48135.7	34314.5	42863.8	26253.4	35193.6	36426	30906.3	23696.6	27152.9	29616	44540.2	25926	36953.9	35844.9	33568.7	31742.9	25040.6	25591.9	33243.5	36033	28377	34696	42563.4	27179.4	31731.6	30618.1	29807.3	23292.7	26938.3	34395.3	34310.9	33212.1	34577.6	39168.1	32812.5	30386.8
Rhodopseudomonas_palustris	1.91054	15.036	9.35004	9.02241	19.7937	10.9419	6.02355	14.9351	5.27465	10.8094	18.6807	3.89772	12.6869	9.93721	21.008	11.5909	9.40234	9.61869	0.833526	6.51966	48.2063	8.25581	3.47914	2.45708	4.46295	27	7.05817	14.4475	13.1019	12.0843	6.49851	4.56551	7.51619	7.15018	13.3327	1.8903	11.7031	5.56793	21.2518	23.7234	7.30226
3300009425_____Ga0114997_10000721	1.91054	15.9758	2.07779	7.01743	13.543	14.2245	8.60507	26.5513	0.753521	0	13.3433	0	1.69159	3.3124	4.50172	5.79545	0	7.48121	5.00115	0	5.02149	14.26	9.7416	2.45708	1.78518	1	13.108	15.4107	5.03919	10.358	0.722057	9.13102	0	0	2.05118	11.3418	18.2048	1.59084	12.3037	7.90781	2.08636
Tephritis_californica	24.8371	41.349	34.2835	33.0822	38.5456	21.8839	34.4203	48.1242	21.0986	32.4282	70.7197	10.3939	18.1846	18.7703	41.2657	27.5284	30.0875	35.2685	22.5052	21.7322	45.1934	49.5349	103.679	37.6752	23.2074	23	38.3158	78.0168	28.2195	18.9896	16.6073	26.4799	36.0777	20.5568	21.5374	50.0931	61.1161	28.6351	44.7406	48.4353	32.3386
Malus_domestica	14.3291	37.59	22.8557	27.0672	43.7545	29.5432	31.8388	33.1891	15.0704	33.3289	46.7017	10.3939	24.528	6.62481	28.5109	25.3551	35.7289	28.8561	21.6717	18.4724	25.1075	63.0444	48.708	49.1416	32.1333	14	29.241	43.3426	24.1881	41.4319	11.5529	26.4799	46.6004	16.9817	28.7166	38.7512	83.2219	38.9755	34.6739	27.6773	29.2091
Saccoglossus_kowalevskii	24.8371	49.8068	39.478	46.1145	58.3393	33.92	48.1884	59.7404	18.0845	60.3524	68.051	20.7878	41.8668	32.0199	37.5143	42.7414	31.968	24.5811	29.1734	26.0787	24.1032	93.0655	101.591	51.5987	41.9518	21	42.349	95.3538	26.2038	58.6951	20.9397	35.611	90.1943	30.3883	21.5374	44.4222	124.833	46.9297	55.9257	41.516	35.4681
Neotoma_lepida	2912.62	3362.43	3407.57	2729.78	3155.53	2553.85	2937.77	3083.27	2341.94	2525.79	4767.57	2616.67	2783.93	4337.04	3040.16	3821.37	3033.2	3518.3	3224.08	3172.9	2826.1	2595.33	2937.79	2372.72	3209.76	3607	3804.36	3257.44	2919.71	3209.24	2823.24	2352.15	2750.93	2478.43	2591.67	3806.13	3419.9	3508.59	3247.05	3663.29	2647.59
Crotalus_pyrrhus	53.4952	87.3968	66.4892	95.2365	84.3836	48.1445	58.5145	87.9512	39.1831	94.5821	81.3943	36.3787	76.9673	41.9571	54.7709	60.1277	41.3703	59.8496	56.6798	58.677	58.2493	114.08	3211.25	54.8748	54.448	52	48.3989	85.7221	46.3606	74.2321	60.6528	63.9171	79.6716	37.5385	53.3308	66.1607	126.133	66.0198	69.3479	65.2394	58.4181
Drosophila_albomicans	24.8371	31.0118	23.8945	30.0747	29.1696	13.1303	25.8152	16.5946	20.3451	32.4282	29.3553	11.6932	27.9112	12.1455	21.7583	25.3551	30.0875	24.5811	12.5029	16.2992	34.1462	36.7759	30.6165	27.8469	21.4222	16	17.1413	40.4531	29.2273	34.5266	17.3294	32.8717	24.0518	27.707	15.3839	26.4643	33.8089	27.0442	25.7258	21.7465	40.684
Thioalkalivibrio_sp._ALE19	10.508	12.2168	8.31115	3.00747	17.7101	5.47097	14.6286	31.5297	8.28873	1.80156	18.6807	3.89772	0.845794	3.3124	9.00343	8.69317	3.76094	3.20623	10.0023	2.17322	16.0688	10.5074	8.34995	3.27611	2.67777	6	7.05817	24.0792	10.0784	1.72633	4.33234	11.8703	3.00648	6.25641	5.12796	5.67091	22.1058	16.7038	17.8962	18.781	10.4318
Saimiri_boliviensis	52409.1	48282.5	46704.5	53389.6	53979.5	52578.2	46829.7	49896.5	45711.6	53298.4	48504.3	53671.6	54015	48350	49722.2	49265.6	51741.1	49185.7	47269.2	47313.2	54104.6	51483.2	43952.7	61460.6	59714.3	49724	42792.7	43379.2	52285.7	50593.5	52004	48938.6	52420.9	49580.3	52324.7	49360.6	47495	50286.4	46218.1	47636.6	52347.8
Metrosideros_polymorpha	6.6869	11.277	6.23336	12.0299	20.8355	8.75355	12.9076	19.9135	6.02817	19.8172	21.3493	9.09468	10.5724	440.55	102.789	10.8665	5.64141	11.7562	10.8358	4.34644	25.1075	30.0211	16.0041	190.833	19.637	9	14.1163	71.2746	15.1176	18.9896	30.3264	13.6965	30.0648	8.04396	6.15355	7.56122	26.0069	35.7938	15.6592	29.6543	10.4318
Zaprionus_indianus	25.7923	31.9515	25.9723	24.0598	47.9216	26.2606	30.1178	23.2324	14.3169	30.6266	26.6867	20.7878	21.5678	12.1455	27.0103	17.3863	18.8047	24.5811	23.3387	17.3858	27.1161	57.7907	44.533	23.7518	22.3148	17	23.1911	40.4531	20.1568	18.9896	13.7191	19.1751	36.0777	22.3443	20.5118	37.8061	49.413	44.5435	24.6073	61.2855	16.6909
Nelumbo_nucifera	40.1214	55.4453	35.3224	44.1096	75.0077	25.1664	34.4203	51.4431	23.3591	40.5352	76.057	24.6856	30.8715	15.4579	36.0137	24.6306	47.0117	36.3373	24.1722	30.4251	36.1548	84.8097	57.7538	54.0557	50.8777	23	47.3906	94.3906	40.3135	58.6951	23.1058	39.2634	60.1295	32.1758	34.8701	51.9834	105.328	36.5893	81.6515	38.5506	42.7704
Anopheles_minimus	8.59744	25.3733	10.3889	180.448	26.0443	15.3187	19.7917	19.9135	6.02817	23.4203	30.6897	12.9924	15.6472	7.72894	9.75372	15.213	33.8484	10.6874	9.16878	6.51966	14.0602	41.2791	26.4415	17.1996	13.3889	8	13.108	30.8214	19.1489	15.537	11.5529	14.6096	18.0389	18.7692	11.2815	19.8482	44.2117	19.0901	20.1333	23.7234	14.6045
Hippocampus_comes	64.0032	132.505	79.9948	88.2191	152.099	108.325	98.9583	146.032	57.2676	122.506	117.421	77.9544	70.2009	52.9985	80.2806	78.2385	80.8601	58.7809	76.6844	67.3699	81.3482	152.357	149.603	79.4455	99.0776	75	110.914	185.892	79.6192	108.759	71.4836	113.225	100.717	69.7143	61.5355	100.186	195.051	87.4961	144.288	147.283	108.491
Symbiodinium_microadriaticum	77.377	207.685	101.812	97.2415	166.684	195.861	135.96	159.308	112.275	139.621	142.774	100.041	93.8832	65.1439	122.297	200.667	84.6211	106.874	74.1838	79.3226	76.3267	244.672	249.803	149.063	127.64	54	119.989	206.118	111.87	122.569	143.689	166.185	79.6716	92.9524	113.841	150.279	224.959	152.72	123.037	250.084	97.0158
Strongylocentrotus_purpuratus	92.6613	134.384	89.3448	101.251	155.224	83.1587	104.121	114.502	55.7605	154.935	137.436	80.5529	71.4696	65.1439	98.2875	73.8919	80.8601	76.9495	85.8532	79.3226	76.3267	195.888	150.299	78.6265	86.5813	59	108.898	168.555	70.5487	117.39	54.8763	103.18	139.801	70.6081	79.9961	115.309	226.26	101.814	147.644	152.225	88.6703
Tetrahymena_malaccensis	7.64217	9.3975	7.27225	14.0349	16.6684	4.37677	4.30254	14.9351	5.27465	7.20626	18.6807	3.89772	8.45794	2.20827	4.50172	7.24431	11.2828	11.7562	1.66705	7.60627	7.03009	19.5137	8.34995	12.2854	7.14072	8	8.06648	18.3002	8.06271	10.358	5.0544	11.8703	27.0583	8.04396	5.12796	13.2321	23.4062	6.36335	6.71108	8.89628	14.6045
Cucumis_melo	29.6134	31.9515	17.6612	41.1021	55.214	21.8839	22.3732	34.8486	21.0986	28.825	30.6897	18.1894	18.6075	18.7703	46.5177	18.8352	13.1633	16.0312	20.0046	20.6456	28.1204	52.537	116.899	40.9513	24.9925	20	36.2992	57.7902	21.1646	34.5266	15.8853	47.4813	67.6457	27.707	16.4095	33.0803	62.4165	32.6122	35.7924	39.539	47.9863
Dryococelus_australis	691.616	1198.18	636.842	778.935	991.768	796.573	1094.57	1098.56	525.204	608.028	1413.06	346.897	562.876	553.171	880.085	771.519	635.598	591.015	604.306	567.211	708.031	1245.13	1020.78	718.286	742.635	543	954.87	2301.98	542.217	933.943	498.219	696.697	695.999	724.85	505.617	8550.79	1508.4	827.236	1175.56	1322.58	812.638
Thunnus_orientalis	177.68	259.371	227.518	229.57	281.279	237.44	233.197	275.47	127.345	130.613	320.24	124.727	141.248	204.265	253.597	201.392	191.808	241.536	306.737	202.11	235.006	240.169	256.065	162.167	263.314	204	314.593	342.888	180.403	276.212	113.363	214.579	201.434	184.117	173.325	300.558	357.594	234.649	299.762	299.508	206.55
Epichloe_sylvatica	91.706	155.999	34.2835	114.284	129.18	89.7238	98.9583	180.881	65.5563	91.8798	105.412	59.765	101.918	65.1439	123.047	82.5851	58.2945	41.681	37.5087	38.0314	81.3482	126.839	311.731	122.035	59.8036	39	69.5734	200.339	70.5487	82.8637	70.7616	90.3971	88.691	78.652	107.687	100.186	144.338	113.745	192.384	149.26	80.3249
Vigna_radiata	30.5687	31.9515	18.7001	23.0573	41.6709	20.7897	23.2337	44.8053	15.0704	28.825	40.03	22.0871	38.0607	23.1868	27.0103	26.0795	41.3703	17.0999	27.5064	24.992	18.0774	73.5518	34.7914	43.4084	39.274	13	35.2909	63.5692	21.1646	39.7055	19.4955	31.0455	58.6263	25.9194	17.4351	38.7512	96.2254	31.0213	40.2665	33.6082	32.3386
Neocallimastix_californiae	11.4633	5.6385	3.11668	13.0324	9.37596	1.09419	8.60507	8.29728	9.79577	8.10704	13.3433	5.19696	5.07477	15.4579	6.00229	6.51988	9.40234	9.61869	5.83468	3.25983	5.02149	19.5137	9.04578	18.0186	6.24813	4	8.06648	15.4107	7.05487	5.17898	5.77646	9.13102	13.5291	5.36264	6.15355	2.83546	28.6075	5.56793	11.1851	8.89628	10.4318
Romanomermis_culicivorax	9.55271	21.6143	12.4667	10.0249	15.6266	7.65935	11.1866	24.8918	5.27465	21.6188	22.6837	7.79544	11.8411	15.4579	16.5063	13.0398	5.64141	10.6874	14.1699	14.1259	12.0516	19.5137	119.683	16.3805	11.6037	10	10.0831	67.4219	13.1019	17.2633	5.0544	10.0441	31.568	5.36264	10.2559	18.903	29.9079	16.7038	17.8962	18.781	10.4318
Ammotragus_lervia	854.968	1038.42	865.398	861.139	766.745	1174.07	857.926	980.739	838.669	830.521	1078.14	838.01	966.743	934.098	916.849	956.249	962.8	882.782	571.799	883.414	868.718	863.108	3933.52	759.237	819.398	968	904.455	1222.26	952.407	1027.17	717.725	967.888	1019.2	832.103	809.192	591.665	1269.13	897.232	979.818	1196.06	887.747
Cerataphis_brasiliensis_yeast-like_symbiont	0	3.759	6.23336	1.00249	0	2.18839	1.72101	4.97837	0.753521	2.70235	1.33433	2.59848	2.96028	0	3.75143	5.79545	3.76094	0	3.3341	3.25983	1.0043	4.50317	0.695829	3.27611	0.892591	0	7.05817	160.849	0	5.17898	2.16617	0.913102	1.50324	2.68132	1.02559	0.945152	3.90103	34.9984	2.23703	0	2.08636
Ogataea_polymorpha	12.4185	22.554	6.23336	24.0598	10.4177	7.65935	12.0471	18.254	14.3169	8.10704	14.6777	9.09468	17.3388	14.3537	9.75372	7.24431	7.52187	14.9624	15.837	13.0393	20.086	5.2537	9.04578	9.00929	22.3148	12	9.07479	16.3739	13.1019	15.537	15.1632	11.8703	15.0324	9.8315	6.15355	11.3418	16.9045	8.74961	8.94811	9.88476	8.34544
Geospiza_fortis	267.476	414.43	358.418	268.667	363.579	501.14	377.763	461.329	294.627	258.525	445.667	216.973	244.857	264.992	369.891	441.178	229.417	302.454	300.069	282.519	322.38	346.744	540.659	226.87	289.199	246	468.864	663.624	296.305	315.918	236.113	346.979	297.641	257.407	204.093	319.462	501.932	440.662	448.524	570.351	304.609
Klebsiella_pneumoniae	223.533	202.046	209.856	221.55	182.31	201.332	154.031	194.156	186.873	197.271	130.765	246.856	248.241	183.286	184.57	188.352	180.525	212.68	209.215	167.338	204.877	146.353	142.645	206.395	237.429	204	159.313	323.625	216.685	227.875	243.333	203.622	159.343	172.498	294.345	196.592	163.843	186.923	106.259	137.398	329.645
Lobosporangium_transversale	36.3003	27.2528	13.5056	22.0548	21.8772	20.7897	27.5362	19.9135	36.9225	59.4516	25.3523	58.4658	50.7477	8.83308	44.2669	22.4574	47.0117	10.6874	7.50173	9.7795	21.0903	18.7632	22.2665	38.4942	5.35554	11	5.04155	25.0424	32.2508	32.8002	33.2146	19.1751	28.5615	42.0073	56.4075	41.5867	39.0103	13.5221	14.5407	11.8617	37.5545
Pseudomonas_sp._Irchel_3E19	5.73163	25.3733	8.31115	14.0349	16.6684	16.4129	17.2101	23.2324	7.53521	15.3133	17.3463	18.1894	9.30374	12.1455	15.756	15.213	11.2828	10.6874	20.8381	5.43305	13.0559	21.0148	17.3957	23.7518	43.7369	7	12.0997	34.6741	11.0862	3.45266	19.4955	19.1751	13.5291	13.4066	21.5374	20.7934	24.7065	14.3175	45.8591	20.758	7.30226
Sinocyclocheilus_anshuiensis	82.1533	155.059	105.967	77.1917	127.096	108.325	115.308	132.756	63.2957	113.499	145.442	61.0643	64.7033	73.977	72.0275	105.767	63.9359	90.8432	99.1896	74.9761	78.3353	156.86	134.991	107.292	121.392	69	147.213	218.64	51.3998	105.306	66.4292	94.9626	99.2137	79.5458	62.5611	87.8992	191.15	98.6319	128.629	131.467	66.7635
Mrakia_psychrophila	10.508	44.1683	16.6223	30.0747	29.1696	35.0142	22.3732	0	14.3169	7.20626	66.7167	19.4886	15.6472	24.291	43.5166	32.5994	16.9242	23.5124	25.0058	17.3858	24.1032	26.2685	25.7457	6.55221	15.174	20	33.2742	62.606	16.1254	24.1686	7.22057	15.5227	13.5291	14.3004	20.5118	51.0382	52.0137	14.3175	39.148	61.2855	23.9931
Aciculosporium_take	17.1949	15.036	18.7001	18.0448	9.37596	13.1303	14.6286	14.9351	13.5634	11.7102	13.3433	12.9924	18.6075	12.1455	13.5051	7.96874	30.0875	11.7562	22.5052	7.60627	15.0645	12.0085	2.08749	15.5615	10.7111	14	13.108	8.66853	32.2508	44.8845	12.997	11.8703	27.0583	9.8315	16.4095	11.3418	22.1058	10.3404	5.59257	4.94238	13.5613
Nipponia_nippon	145.201	186.071	144.406	84.2091	204.188	222.121	170.38	214.07	142.415	213.485	210.825	142.916	133.213	149.058	130.55	198.494	154.198	107.943	90.0208	122.787	148.636	247.674	221.969	144.968	175.84	120	185.529	248.498	121.948	167.454	155.964	150.662	190.911	117.084	107.687	125.705	308.181	157.493	190.147	226.361	145.002
Dugesia_japonica	74.5112	102.433	77.917	106.264	125.013	60.1806	79.1667	152.67	39.1831	63.0548	138.771	50.6703	74.007	51.8943	68.276	51.4346	97.7844	67.3309	44.1769	53.2439	74.3181	172.622	109.941	118.759	68.7295	50	84.6981	437.279	70.5487	139.833	57.0425	74.8743	175.879	54.5201	53.3308	92.6249	228.86	95.4503	85.0071	97.8591	93.8862
Streptomyces_capitiformicae	11.4633	0	13.5056	0	6.25064	9.84774	0.860507	9.95674	11.3028	21.6188	1.33433	15.5909	24.1051	9.93721	8.25315	10.8665	20.6852	7.48121	11.6694	16.2992	0	0	0	0	1.78518	10	2.01662	0	14.1097	15.537	2.16617	0.913102	30.0648	0	23.5886	0.945152	7.80206	14.3175	4.47406	0	0
Agrilus_planipennis	23.8818	41.349	11.4278	53.132	48.9633	21.8839	31.8388	34.8486	15.8239	34.2297	46.7017	15.5909	24.1051	9.93721	26.26	23.9062	41.3703	13.8937	32.5075	18.4724	25.1075	42.7801	38.9664	22.9327	25.8851	14	38.3158	102.096	15.1176	22.4423	12.997	28.3062	48.1036	18.7692	13.3327	43.477	71.5189	30.2259	38.0295	36.5736	22.95
Onchocerca_volvulus	21.9712	8.45775	15.5834	11.0274	12.5013	5.47097	15.4891	9.95674	13.5634	17.1149	12.009	10.3939	9.30374	5.52067	12.0046	10.142	20.6852	6.41246	9.16878	6.51966	22.0946	12.0085	13.2207	13.9234	10.7111	19	7.05817	23.1161	14.1097	17.2633	10.8309	6.39171	13.5291	20.5568	8.20473	19.8482	9.1024	10.3404	13.4222	8.89628	19.8204
Mesorhizobium_sp._L2C089B000	10.508	9.3975	4.15557	5.01245	17.7101	6.56516	8.60507	14.9351	6.78169	5.40469	9.34033	7.79544	11.4182	3.3124	9.75372	12.3153	7.52187	1.06874	3.3341	6.51966	3.0129	15.0106	6.95829	4.09513	5.35554	3	7.05817	13.4844	2.01568	10.358	8.66468	4.56551	4.50971	8.04396	19.4862	4.72576	13.0034	15.113	20.1333	11.8617	12.5182
Timema_cristinae	169.083	141.902	138.173	153.381	153.141	67.84	149.728	165.946	74.5986	154.034	164.123	75.3559	132.367	109.309	119.295	107.216	141.035	111.149	96.689	128.22	144.619	210.148	166.303	170.357	141.029	151	118.981	231.161	142.105	172.633	89.5351	142.444	223.982	151.941	109.738	140.828	222.359	139.994	123.037	129.49	172.125
Latimeria_chalumnae	283.716	453.899	314.785	291.725	402.124	323.881	351.087	453.032	207.218	381.932	421.649	215.674	227.519	181.078	304.616	316.576	268.907	241.536	271.729	248.834	267.143	515.613	697.916	299.764	249.925	199	303.501	568.27	234.826	348.718	223.116	294.019	321.693	269.026	215.374	350.652	665.775	412.822	420.561	518.95	298.35
Drosophila_serrata	19.1054	15.036	15.5834	54.1345	30.2114	18.6013	16.3496	18.254	13.5634	24.3211	34.6927	19.4886	9.72663	6.62481	10.504	16.6619	28.207	13.8937	45.8439	13.0393	17.0731	32.2727	42.4456	24.5708	21.4222	12	17.1413	207.082	19.1489	27.6212	14.4411	9.13102	27.0583	9.8315	8.20473	60.4898	46.8123	19.0901	15.6592	18.781	23.9931
Pleurobrachia_bachei	12.4185	24.4335	17.6612	30.0747	40.6291	25.1664	22.3732	29.8702	7.53521	22.5196	20.015	5.19696	10.5724	8.83308	26.26	13.7642	15.0437	9.61869	18.3376	16.2992	16.0688	56.2896	21.5707	34.3991	64.2665	2	25.2078	58.7534	12.0941	18.9896	12.275	16.4358	10.5227	21.4505	19.4862	44.4222	37.7099	11.9313	22.3703	29.6543	12.5182
Biomphalaria_glabrata	85.9744	153.179	116.356	102.254	143.765	90.818	111.866	170.924	76.8591	129.713	158.786	80.5529	109.953	71.7687	114.043	103.594	112.828	87.637	83.3526	74.9761	86.3697	231.913	182.307	148.244	138.352	93	117.972	260.056	112.878	136.38	76.538	107.746	175.879	76.8645	107.687	106.802	279.574	124.881	130.866	166.064	106.404
Xanthomonas_campestris	3.82109	5.6385	2.07779	3.00747	10.4177	6.56516	5.16304	14.9351	7.53521	8.10704	5.33733	2.59848	2.53738	3.3124	5.252	10.142	0	11.7562	9.16878	1.08661	1.0043	6.00423	4.17497	14.7425	14.2814	6	14.1163	3.85268	8.06271	10.358	5.0544	3.65241	3.00648	5.36264	3.07677	2.83546	7.80206	11.1359	4.47406	25.7004	7.30226
Madurella_mycetomatis	50.6294	42.2888	41.5557	52.1295	47.9216	62.369	32.6993	38.1675	41.4436	30.6266	42.6987	33.7802	35.1005	38.6447	53.2703	43.4658	43.2508	50.231	47.511	61.9368	53.2278	47.2833	46.6205	79.4455	52.6628	29	43.3574	44.3058	51.3998	27.6212	46.9337	50.2206	27.0583	43.7949	28.7166	72.7767	24.7065	248.171	38.0295	31.6312	44.8568
Plasmodium_cynomolgi	12.4185	23.4938	6.23336	18.0448	12.5013	28.449	18.9312	6.63782	9.79577	27.9243	17.3463	32.481	19.4533	3.3124	20.2577	13.0398	7.52187	3.20623	5.00115	3.25983	29.1247	17.2622	18.7874	27.8469	16.9592	11	3.02493	32.7478	14.1097	6.90531	13.7191	18.262	9.01943	13.4066	32.8189	18.903	24.7065	6.36335	20.1333	6.91933	23.9931
Chelonia_mydas	220.668	318.575	248.296	212.528	482.341	316.222	274.502	341.848	178.584	398.146	432.324	196.185	220.752	161.204	225.836	274.559	236.939	195.58	172.54	207.543	190.817	531.374	495.43	353.819	274.918	140	289.385	427.647	200.56	302.107	165.351	280.322	318.686	164.454	183.581	217.385	586.455	316.577	365.754	336.082	254.536
Lates_calcarifer	128.006	392.816	151.678	267.665	315.657	291.055	284.828	325.253	100.218	246.814	378.951	129.924	112.068	83.9142	195.074	203.565	105.306	150.693	205.881	120.614	185.795	436.057	271.373	336.62	397.203	104	199.645	438.242	136.058	214.065	148.744	189.925	126.272	118.872	148.711	290.162	452.519	161.47	407.139	276.773	136.657
Acanthaster_planci	35.345	41.349	37.4002	21.0523	32.295	25.1664	26.6757	43.1459	24.1127	22.5196	36.027	24.6856	24.528	28.7075	24.7594	20.2841	28.207	19.2374	22.5052	20.6456	22.0946	52.537	41.7497	29.4849	21.4222	25	35.2909	201.302	26.2038	43.1582	18.7735	24.6537	49.6069	25.9194	25.6398	38.7512	62.4165	25.4534	27.9628	31.6312	40.684
Schistosoma_margrebowiei	15.2843	30.072	13.5056	24.0598	27.0861	20.7897	15.4891	23.2324	10.5493	20.718	22.6837	16.8901	18.1846	8.83308	22.5086	20.2841	15.0437	14.9624	15.0035	7.60627	13.0559	33.7738	23.6582	31.123	16.0666	12	17.1413	43.3426	15.1176	29.3476	17.3294	20.0882	37.5809	15.1941	14.3583	29.2997	42.9113	17.4992	25.7258	20.758	15.6477
Methylobacterium_sp._MB200	9.55271	1.8795	4.15557	0	14.5848	20.7897	6.88406	28.2108	7.53521	17.1149	17.3463	14.2916	11.4182	1.10413	9.75372	25.3551	7.52187	14.9624	12.5029	3.25983	1.0043	2.25159	1.39166	7.37124	20.5296	5	9.07479	0	8.06271	24.1686	2.88823	0.913102	12.0259	2.68132	9.23032	0	27.3072	8.74961	19.0147	16.8041	1.04318
Pseudomonas_sp._GM78	6.6869	4.69875	9.35004	5.01245	13.543	3.28258	7.74457	6.63782	5.27465	2.70235	13.3433	6.4962	2.96028	3.3124	6.00229	8.69317	3.76094	5.34372	5.00115	2.17322	4.0172	11.2579	9.04578	4.09513	2.67777	4	8.06648	8.66853	3.02352	10.358	3.61029	6.39171	3.00648	3.57509	3.07677	7.56122	9.1024	11.9313	10.0666	20.758	0
Hordeum_pubiflorum	214.936	1821.24	539.186	977.428	1468.9	1558.13	1453.4	1591.42	623.162	1025.09	1442.41	796.434	1510.17	511.214	1469.06	1295.28	708.937	842.17	792.683	612.848	1111.76	1267.64	833.603	955.804	702.469	557	762.283	2070.82	1262.82	1175.63	683.788	650.128	834.297	729.319	1637.87	1401.66	1520.1	886.097	2728.06	1134.77	1013.97
Mola_mola	65.9137	113.71	76.8781	108.269	155.224	84.2529	91.2138	152.67	41.4436	108.995	138.771	71.4582	65.9719	51.8943	78.0297	84.7584	58.2945	63.0559	73.3503	52.1573	96.4127	193.636	158.649	99.9212	124.07	63	110.914	228.271	77.6036	157.096	59.2087	94.0495	160.846	63.4579	77.945	143.663	205.454	84.3144	90.5996	132.456	151.261
Pteronotus_parnellii	6088.9	6811.31	6529.45	6371.83	5631.83	5681.05	5547.69	6018.85	5399.73	5899.22	5972.48	6436.43	6745.21	6353.19	6361.68	5591.16	6196.14	6015.96	6107.24	6366.45	6285.91	5378.29	4236.21	6103.38	5793.81	6890	6323.12	5787.69	6007.73	7055.5	5473.91	5006.54	6495.49	5939.12	6205.85	5441.24	6670.76	6658.45	5495.26	5553.26	6400.95
Drosophila_biarmipes	48.7188	44.1683	33.2446	34.0847	38.5456	41.5793	30.9783	28.2108	34.662	17.1149	37.3613	24.6856	31.2944	40.853	34.5132	47.8124	37.6094	32.0623	36.6751	32.5983	37.1591	54.038	92.5452	26.2088	32.1333	29	52.4321	164.702	41.3214	53.5162	21.6617	31.0455	52.6133	35.7509	21.5374	42.5319	63.7168	77.951	30.1999	27.6773	39.6409
Pogona_vitticeps	769.949	1588.18	843.581	931.313	1425.15	1534.06	1364.76	1186.51	607.338	729.634	1609.21	645.722	775.593	1001.45	1772.18	1020	801.08	991.794	1119.43	863.855	949.062	1704.45	1132.11	866.53	2206.48	1153	1435.83	2074.67	978.611	1141.1	470.781	835.488	868.872	924.161	772.27	1017.93	2144.27	863.825	2249.33	3410.24	1002.5
Sebastes_rubrivinctus	17.1949	28.1925	450.88	17.0423	17.7101	10.9419	24.0942	21.5729	6.78169	16.2141	17.3463	12.9924	10.1495	397.488	10.504	7.96874	13.1633	374.06	395.925	360.755	14.0602	37.5264	23.6582	20.4757	482.892	358	614.061	31.7846	10.0784	20.7159	7.22057	6.39171	13.5291	19.663	12.3071	22.6837	26.0069	6.36335	11.1851	8.89628	23.9931
Aspergillus_aculeatus	3.82109	4.69875	1.03889	5.01245	5.20887	0	1.72101	4.97837	2.26056	2.70235	4.003	2.59848	3.38318	4.41654	174.817	2.89772	9.40234	5.34372	0.833526	3.25983	6.02579	12.759	1.39166	4.91416	2.67777	0	0	3.85268	3.02352	0	2.16617	2.7393	0	0.893773	2.05118	2.83546	11.7031	7.15877	2.23703	3.9539	3.12954
Frankliniella_occidentalis	51.5847	62.0235	57.1391	48.1195	85.4254	47.0503	41.3044	51.4431	49.7324	127.01	61.3793	77.9544	51.1705	45.2695	40.5154	23.9062	45.1312	45.956	45.0104	38.0314	40.172	96.8182	71.6704	43.4084	42.8443	39	46.3823	133.881	53.4154	67.3268	25.9941	51.1337	70.6522	37.5385	56.4075	34.0255	137.836	51.7022	51.4516	50.4123	51.1158
Drosophila_simulans	9.55271	8.45775	6.23336	8.01992	8.33418	2.18839	5.16304	13.2756	2.26056	7.20626	2.66867	0	4.65187	5.52067	3.00114	5.79545	5.64141	4.27497	5.83468	0	4.0172	14.26	24.354	4.91416	4.46295	6	8.06648	15.4107	5.03919	10.358	2.16617	2.7393	9.01943	4.46886	1.02559	8.50637	20.8055	11.1359	6.71108	4.94238	2.08636
Columba_livia	62.0926	228.359	81.0337	138.344	160.433	97.3832	124.774	160.967	43.7042	149.53	160.12	61.0643	57.9369	50.7902	85.5326	87.6561	58.2945	89.7745	95.0219	70.6297	87.374	195.137	181.611	108.111	195.477	59	125.031	226.345	74.5801	139.833	59.9307	119.616	106.73	58.989	89.2265	152.17	265.27	74.7694	204.688	151.237	85.5408
Kocuria_kristinae	1.91054	1.8795	5.19447	1.00249	17.7101	8.75355	0	11.6162	0.753521	3.60313	1.33433	2.59848	2.53738	2.20827	1.50057	10.142	0	9.61869	5.83468	4.34644	0	1.50106	0.695829	0.819026	638.202	1	9.07479	0.96317	11.0862	0	2.16617	0	16.5356	0	1.02559	0	6.50171	7.95419	1.11851	278.75	2.08636
Dioscorea_rotundata	17.1949	58.2645	20.7779	42.1046	46.8798	20.7897	24.0942	29.8702	18.0845	41.436	68.051	19.4886	26.2196	18.7703	20.2577	21.0085	39.4898	34.1998	30.8405	15.2125	29.1247	82.5581	52.1872	38.4942	33.9184	21	30.2493	68.3851	23.1803	36.2529	15.1632	35.611	46.6004	20.5568	23.5886	36.8609	85.8226	37.3847	58.1627	35.5851	30.2522
Streptococcus_pneumoniae	11.4633	5.6385	9.35004	4.00996	17.7101	15.3187	7.74457	16.5946	6.02817	14.4125	16.012	1.29924	9.30374	2.20827	9.75372	10.142	28.207	11.7562	5.83468	9.7795	14.0602	12.759	11.8291	20.4757	49.9851	9	7.05817	31.7846	18.1411	3.45266	10.1088	8.21791	10.5227	30.3883	8.20473	6.61607	16.9045	16.7038	11.1851	45.4699	10.4318
Bradyrhizobium_elkanii	8.59744	4.69875	9.35004	1.00249	13.543	24.0723	5.16304	23.2324	6.02817	25.2219	28.021	11.6932	14.8014	12.1455	15.756	23.1818	9.40234	3.20623	15.837	14.1259	2.0086	12.0085	7.65412	9.00929	13.3889	9	7.05817	8.66853	11.0862	15.537	4.33234	5.47861	25.555	0.893773	16.4095	2.83546	33.8089	8.74961	17.8962	14.8271	2.08636
Caenorhabditis_angaria	514.891	1181.27	1024.35	820.037	689.654	659.798	916.44	962.485	402.38	358.511	954.048	330.007	500.287	727.625	907.096	623.735	458.834	848.582	1053.58	760.627	785.362	767.04	487.776	465.207	563.225	547	1459.03	1658.58	542.217	645.647	331.424	402.678	356.267	740.938	562.024	1118.12	782.806	941.776	1280.7	1359.15	621.736
Caenorhabditis_elegans	14.3291	22.554	5.19447	13.0324	22.919	36.1084	21.5127	13.2756	15.0704	31.5274	22.6837	10.3939	15.6472	3.3124	23.2589	24.6306	13.1633	11.7562	7.50173	8.69289	24.1032	29.2706	13.9166	27.8469	19.637	6	9.07479	24.0792	15.1176	15.537	20.9397	6.39171	16.5356	6.25641	16.4095	26.4643	29.9079	11.1359	24.6073	20.758	12.5182
Heliconius_pardalinus	52.5399	166.336	127.784	112.279	141.681	141.151	146.286	144.373	97.9577	96.3837	234.843	54.5681	120.103	295.908	205.578	136.917	80.8601	129.318	134.198	152.125	120.516	193.636	194.832	128.587	139.244	79	193.596	334.22	87.682	139.833	77.9822	112.312	115.749	131.385	122.045	183.36	260.069	170.22	287.458	269.854	128.311
Echinococcus_multilocularis	6.6869	15.9758	9.35004	11.0274	12.5013	4.37677	5.16304	4.97837	3.7676	3.60313	13.3433	1.29924	4.22897	5.52067	6.75257	3.62215	13.1633	6.41246	4.16763	4.34644	5.02149	11.2579	10.4374	5.73318	12.4963	1	8.06648	95.3538	6.04703	15.537	4.33234	10.9572	10.5227	4.46886	3.07677	11.3418	18.2048	6.36335	5.59257	10.8732	10.4318
Taenia_solium	22.9265	82.698	57.1391	38.0946	66.6735	66.7458	67.9801	89.6106	56.5141	25.2219	73.3883	15.5909	29.6028	38.6447	60.0229	90.5538	45.1312	64.1246	47.511	60.8502	46.1977	47.2833	74.4537	22.9327	19.637	39	70.5817	110.765	43.3371	44.8845	25.9941	52.9599	30.0648	38.4322	16.4095	75.6122	70.2185	66.8152	72.7034	85.9974	41.7272
Opisthorchis_viverrini	12.4185	16.9155	11.4278	17.0423	20.8355	16.4129	9.46558	13.2756	8.28873	18.9164	29.3553	9.09468	13.1098	15.4579	18.0069	21.0085	18.8047	8.54995	16.6705	13.0393	10.043	18.0127	43.1414	11.4664	17.8518	9	27.2244	33.7109	11.0862	12.0843	11.5529	10.9572	28.5615	10.7253	9.23032	21.7385	28.6075	21.4763	22.3703	15.8156	14.6045
Petromyzon_marinus	40.1214	71.421	43.6335	56.1394	86.4672	70.0284	43.0254	61.3999	36.169	74.7649	78.7257	40.2764	57.0911	57.415	72.7777	57.23	50.7727	51.2997	31.674	57.5904	32.1376	131.342	124.553	59.7889	72.2998	42	49.4072	140.623	37.29	84.5901	24.5499	67.5695	69.1489	38.4322	63.5867	51.0382	165.144	57.2702	70.4664	49.4238	87.6272
Populus_euphratica	20.0607	31.0118	18.7001	27.0672	41.6709	31.7316	27.5362	31.5297	18.0845	42.3368	46.7017	16.8901	25.3738	18.7703	24.7594	25.3551	30.0875	19.2374	19.1711	17.3858	26.1118	57.7907	70.9745	32.7611	30.3481	23	31.2576	61.6429	21.1646	37.9792	22.3838	19.1751	60.1295	25.0256	11.2815	22.6837	55.9147	19.0901	27.9628	31.6312	22.95
Rotylenchulus_reniformis	19.1054	16.9155	10.3889	12.0299	18.7519	15.3187	15.4891	24.8918	8.28873	30.6266	26.6867	14.2916	16.493	14.3537	10.504	18.1108	22.5656	20.3061	6.66821	15.2125	19.0817	39.778	34.7914	20.4757	15.174	4	21.1745	45.269	16.1254	24.1686	10.1088	18.262	30.0648	13.4066	14.3583	17.0127	45.512	16.7038	17.8962	20.758	16.6909
Marmota_marmota	5789.9	4127.38	4585.68	4561.33	3901.44	3704.94	3673.51	3979.38	5257.31	4336.37	3605.37	5289.2	6378.13	6166.59	4244.37	4218.36	6288.29	5074.39	3771.7	5494.99	4462.1	2712.41	3060.95	3810.93	3579.29	5648	3786.21	3849.79	5920.04	5665.81	4625.5	3922.68	5939.29	4047.9	4685.93	4631.25	4141.59	6068.25	3429.36	4671.54	4544.09
Humulus_lupulus	347.719	541.296	343.874	506.257	668.818	518.648	489.629	751.734	301.408	562.989	656.492	285.833	396.255	248.43	572.468	536.079	346.006	506.584	608.474	320.55	321.376	628.943	658.254	507.796	423.981	243	488.022	656.882	500.896	464.382	266.439	259.321	413.39	282.432	421.518	687.126	797.11	380.21	776.249	526.858	328.602
Pseudopodoces_humilis	83.1086	187.01	103.889	76.1892	133.347	158.658	124.774	107.865	82.1338	91.8798	186.807	88.3483	74.4299	98.268	119.295	110.838	84.6211	76.9495	99.1896	80.4092	76.3267	139.598	125.945	72.8933	106.218	63	145.197	214.787	87.682	126.022	65.7072	79.4398	85.6846	84.9084	65.6379	136.102	195.051	74.7694	172.251	182.868	74.0658
Sphaeroforma_arctica	63.0479	140.963	69.6059	6.01494	173.976	238.534	92.9348	124.459	67.8169	64.8563	153.448	59.765	68.0864	26.4992	132.801	137.642	54.5336	5.34372	3.3341	38.0314	59.2536	123.087	78.6287	71.2553	54.448	34	67.5568	144.475	4.03135	117.39	40.4352	46.5682	73.6587	55.4139	72.817	0.945152	154.741	161.47	208.044	209.557	70.9363
Endocronartium_harknessii	17.1949	44.1683	9.35004	0	5.20887	0	0	66.3782	8.28873	21.6188	30.6897	7.79544	7.61215	7.72894	31.512	1.44886	1.88047	2.13749	0.833526	11.9527	27.1161	42.7801	3.47914	27.8469	32.1333	0	16.133	43.3426	1.00784	6.90531	0.722057	2.7393	9.01943	0.893773	16.4095	0.945152	36.4096	3.18168	33.5554	19.7695	0
Triticum_aestivum	107.946	130.625	134.017	139.346	170.851	147.716	117.029	151.011	55.7605	331.488	220.165	110.435	374.687	68.4563	126.048	136.193	120.35	115.424	110.859	94.5351	107.46	369.26	240.061	683.887	191.014	102	143.18	187.818	1726.43	176.085	81.5924	121.443	198.427	84.0146	129.225	103.022	405.707	139.994	201.333	175.949	118.923
Ephemera_danica	64.9585	62.0235	49.8669	57.1419	71.8823	28.449	42.1649	74.6755	33.1549	60.3524	82.7287	23.3863	49.0561	32.0199	64.5246	46.3636	84.6211	43.8185	31.674	34.7715	52.2235	97.5687	69.5829	71.2553	33.9184	40	51.4238	102.096	44.3449	88.0427	35.3808	54.7861	99.2137	52.7326	36.9213	37.8061	133.935	61.2472	46.9776	64.2509	52.159
Arabidopsis_lyrata	11.4633	14.0963	3.11668	5.01245	10.4177	2.18839	9.46558	19.9135	0.753521	7.20626	13.3433	2.59848	7.18925	3.3124	3.75143	2.17329	5.64141	3.20623	10.8358	2.17322	4.0172	10.5074	6.95829	8.19026	9.8185	5	5.04155	10.5949	7.05487	13.8106	2.88823	7.30481	18.0389	1.78755	3.07677	6.61607	18.2048	7.15877	13.4222	6.91933	7.30226
Cuculus_canorus	240.728	203.926	169.34	343.854	170.851	147.716	223.732	204.113	235.852	278.342	216.162	337.802	359.463	176.662	170.315	132.571	242.58	197.718	247.557	133.653	299.281	176.374	4245.95	225.232	141.922	278	152.255	173.371	297.312	255.497	209.397	196.317	293.131	300.308	178.453	215.495	231.461	272.829	154.355	164.087	250.363
Laupala_kohalensis	177.68	253.733	146.484	189.471	426.085	425.641	165.217	253.897	89.669	540.469	313.568	224.768	337.895	143.537	177.067	189.076	176.764	169.93	157.536	138	136.585	376.015	543.442	235.88	285.629	157	208.72	518.185	156.215	486.824	92.4233	198.143	414.894	102.784	406.134	207.934	498.031	176.583	266.206	492.261	167.952
Sporothrix_insectorum	4.77636	6.57825	8.31115	9.02241	19.7937	9.84774	8.60507	8.29728	7.53521	16.2141	13.3433	11.6932	12.264	5.52067	16.5063	6.51988	9.40234	10.6874	6.66821	9.7795	8.03439	15.7611	11.1333	12.2854	6.24813	7	10.0831	12.5212	11.0862	8.63164	6.49851	5.47861	13.5291	12.5128	13.3327	8.50637	6.50171	6.36335	13.4222	11.8617	6.25908
Rhinopithecus_bieti	25377.7	19751.7	23668.1	22810.7	23278.4	22841.3	20425.9	23620.7	23671.9	27163.1	20714.2	28367.6	27049.8	25270.3	22124.4	23042.7	25659	23415.1	23079.5	24180.3	21591.4	20616.3	17580.8	24225.2	26642	25569	21145.3	16967.2	26257.2	25463.3	24268.3	20909.1	25852.7	20496.9	25920.8	20241.4	21191.7	23029	19606.4	18587.3	21846.3
Anolis_carolinensis	198.696	362.744	236.868	258.642	351.078	252.759	228.895	380.015	165.775	236.906	360.27	165.003	175.925	208.681	219.084	241.96	223.776	205.199	225.052	222.755	239.023	373.013	387.577	246.527	225.825	188	283.335	410.31	206.607	293.476	189.901	256.582	260.06	201.993	208.195	254.246	456.42	260.102	314.302	363.759	240.975
Epichloe_uncinata	72.6006	128.746	27.0112	72.1793	114.595	156.47	111.005	96.2485	65.5563	121.606	112.084	84.4506	93.8832	22.0827	95.2863	136.193	58.2945	24.5811	25.0058	19.559	69.2966	124.588	140.557	131.863	20.5296	20	41.3407	179.15	77.6036	63.8741	90.9792	65.7433	46.6004	78.652	69.7402	101.131	123.533	104.2	157.71	177.926	56.3317
Picea_glauca	581.76	1206.64	625.414	924.296	1222	616.031	775.317	1181.53	393.338	805.299	1234.26	574.264	673.252	421.779	754.037	677.343	740.905	612.39	743.505	528.093	648.777	1449.27	1382.61	947.613	1201.43	421	809.673	3589.73	624.86	940.849	530.712	795.312	1172.53	542.52	661.507	1025.49	1715.15	1127.11	1268.39	882.709	670.765
Nannopterum_harrisi	84.0639	176.673	63.3725	119.296	152.099	206.803	138.542	139.394	74.5986	92.7806	216.162	76.6551	96.8434	98.268	135.051	122.429	84.6211	58.7809	99.1896	65.1966	106.456	158.361	145.428	94.188	100.863	63	139.147	231.161	93.729	139.833	75.0939	86.7447	103.723	104.571	96.4056	155.005	227.56	115.336	227.058	194.73	94.9294
Setaria_italica	43.9425	119.348	38.4391	80.1992	79.1748	109.419	72.2826	89.6106	18.0845	72.9634	144.108	36.3787	38.0607	27.6034	62.2737	87.6561	20.6852	53.4372	62.5144	42.3778	57.245	135.846	116.203	122.035	128.533	31	39.3241	165.665	41.3214	41.4319	38.269	50.2206	52.6133	37.5385	64.6123	124.76	135.236	32.6122	156.592	116.64	43.8136
3300007540_____Ga0099847_1000845	3.82109	13.1565	8.31115	7.01743	16.6684	9.84774	17.2101	9.95674	2.26056	0.900782	28.021	0	2.96028	3.3124	13.5051	4.34658	0	2.13749	1.66705	4.34644	7.03009	17.2622	19.4832	3.27611	5.35554	0	7.05817	20.2266	2.01568	1.72633	5.0544	10.0441	0	16.0879	0	14.1773	18.2048	3.97709	20.1333	10.8732	8.34544
Hymenobacter_sp._IS2118	0.955271	5.6385	2.07779	2.00498	7.29241	42.6735	3.44203	3.31891	18.0845	4.50391	5.33733	22.0871	14.8014	19.8744	39.0149	39.1193	7.52187	3.20623	0	13.0393	5.02149	29.2706	35.4873	8.19026	44.6295	2	4.03324	46.2322	3.02352	3.45266	1.44411	22.8275	18.0389	3.57509	17.4351	0	5.20137	23.8626	6.71108	4.94238	14.6045
Auxenochlorella_pyrenoidosa	6.6869	2.81925	43.6335	1.00249	11.4595	2.18839	0	8.29728	6.78169	16.2141	5.33733	10.3939	15.6472	38.6447	9.75372	7.24431	18.8047	21.3749	19.1711	15.2125	1.0043	9.75687	6.26246	3.27611	8.92591	22	19.1579	0.96317	13.1019	5.17898	1.44411	1.8262	7.51619	1.78755	10.2559	0.945152	16.9045	8.74961	3.35554	3.9539	2.08636
Leucoagaricus_gongylophorus	56.361	81.7583	35.3224	9.02241	87.5089	67.84	77.4457	63.0593	38.4296	20.718	98.7407	38.9772	30.8715	44.1654	75.7789	66.6476	31.968	12.8249	6.66821	36.9448	60.2579	87.0613	93.2411	37.6752	65.1591	50	66.5485	129.065	16.1254	34.5266	25.9941	48.3944	64.6392	58.989	27.691	8.50637	84.5223	37.3847	88.3626	143.329	60.5045
Physeter_catodon	3805.8	3365.25	4020.52	3495.68	3639.96	3572.54	3078.9	3574.47	3561.89	3462.61	2992.91	3917.21	5452.84	4435.31	3349.28	3288.92	3806.07	3664.72	2910.67	4397.51	3492.95	3054.65	3220.3	3347.36	3852.42	4120	3591.6	3405.77	3867.08	3915.31	3478.87	3208.64	4282.72	3365.05	3858.28	3165.32	3742.39	3662.11	3169.87	3087.01	3458.14
Galleria_mellonella	45.853	54.5055	25.9723	41.1021	66.6735	21.8839	37.8623	77.9944	20.3451	33.3289	97.4063	15.5909	43.5584	16.562	41.2657	42.017	80.8601	34.1998	31.674	24.992	40.172	99.0697	60.5371	62.246	48.1999	29	43.3574	112.691	37.29	70.7794	22.3838	37.4372	78.1684	24.1319	27.691	43.477	91.024	43.748	73.8219	60.297	40.684
3300007276_____Ga0070747_1000249	8.59744	27.2528	7.27225	7.01743	31.2532	14.2245	12.0471	31.5297	4.52112	10.8094	24.018	9.09468	2.11449	6.62481	7.50286	21.7329	3.76094	0	5.83468	7.60627	13.0559	21.0148	23.6582	13.1044	6.24813	9	24.1995	20.2266	0	12.0843	11.5529	9.13102	4.50971	13.4066	7.17914	12.287	22.1058	7.95419	14.5407	37.5621	5.2159
Maccullochella_peelii	71.6453	131.565	72.7225	121.301	121.887	71.1226	86.9112	151.011	43.7042	89.1774	158.786	46.7726	55.3995	44.1654	79.5303	60.1277	78.9797	80.1558	78.3514	43.4644	71.3052	149.355	125.945	76.9885	77.6554	43	80.6648	131.954	62.486	98.4007	47.6558	96.7888	120.259	61.6703	55.3819	94.5152	192.451	69.9969	128.629	95.8822	57.3749
Methylobacterium_mesophilicum	36.3003	4.69875	19.739	3.00747	76.0494	88.6296	33.5598	99.5674	67.8169	94.5821	113.418	50.6703	42.2897	26.4992	40.5154	74.6164	43.2508	33.1311	40.0092	22.8188	2.0086	7.50528	16.6999	15.5615	60.6962	26	21.1745	0	28.2195	65.6005	26.7161	4.56551	60.1295	2.68132	42.0493	2.83546	122.232	26.2488	54.8072	43.4929	3.12954
Brassica_napus	43.9425	40.4093	16.6223	36.0896	40.6291	21.8839	30.9783	29.8702	21.8521	29.7258	54.7077	22.0871	27.4883	24.291	45.7674	25.3551	47.0117	30.9936	27.5064	21.7322	27.1161	54.7886	34.7914	49.9606	27.6703	24	27.2244	301.472	36.2822	36.2529	20.2176	20.0882	46.6004	35.7509	16.4095	23.6288	57.2151	31.0213	42.5035	54.3662	28.1659
3300008005_____Ga0100385_1000374	10.508	28.1925	23.8945	28.0697	13.543	48.1445	8.60507	33.1891	26.3732	77.4673	2.66867	9.09468	7.61215	1.10413	12.7549	6.51988	3.76094	9.61869	22.5052	11.9527	24.1032	67.5476	56.3621	21.2947	12.4963	2	6.04986	5.77902	2.01568	27.6212	3.61029	9.13102	4.50971	0.893773	5.12796	10.3967	65.0171	7.15877	16.7777	0.988476	11.475
Neobellieria_bullata	41.0767	76.1198	20.7779	51.127	101.052	40.4851	58.5145	84.6323	25.6197	28.825	120.09	44.1741	44.8271	25.3951	47.268	39.8437	41.3703	33.1311	35.0081	38.0314	48.2063	102.072	132.207	95.007	65.1591	29	47.3906	137.733	33.2587	67.3268	36.8249	61.1778	69.1489	42.0073	47.1772	83.1734	94.925	37.3847	109.614	90.9398	77.1953
Rhodotorula_graminis	22.9265	15.036	10.3889	16.0398	10.4177	10.9419	13.7681	16.5946	27.1267	27.0235	6.67167	20.7878	33.4089	181.078	19.5074	14.4886	28.207	4.27497	13.3364	8.69289	19.0817	14.26	18.0916	16.3805	19.637	17	9.07479	8.66853	19.1489	24.1686	28.1602	21.0013	18.0389	20.5568	29.7422	18.903	10.4027	65.2243	8.94811	4.94238	18.7772
Sesamum_indicum	17.1949	20.6745	16.6223	11.0274	18.7519	12.0361	21.5127	24.8918	13.5634	26.1227	41.3643	19.4886	20.2991	7.72894	18.0069	7.96874	30.0875	12.8249	9.16878	11.9527	9.03869	40.5285	31.3123	21.2947	27.6703	11	26.2161	43.3426	14.1097	32.8002	12.275	23.7406	33.0712	24.1319	13.3327	17.9579	62.4165	25.4534	17.8962	24.7119	21.9068
Dichanthelium_oligosanthes	16.2396	17.8553	19.739	12.0299	43.7545	12.0361	13.7681	21.5729	12.8099	20.718	26.6867	18.1894	23.6822	25.3951	18.0069	11.5909	16.9242	28.8561	15.837	23.9054	18.0774	34.5243	35.4873	23.7518	18.7444	17	27.2244	81.8694	17.1333	22.4423	7.94263	25.5668	40.5874	18.7692	12.3071	17.0127	40.3106	23.0671	15.6592	25.7004	19.8204
Citrus_x_paradisi_x_Citrus_trifoliata	15.2843	24.4335	17.6612	20.0498	36.4621	16.4129	33.5598	43.1459	10.5493	10.8094	65.3823	6.4962	9.72663	15.4579	75.0286	13.0398	60.175	12.8249	12.5029	4.34644	17.0731	33.7738	25.7457	15.5615	21.4222	16	18.1496	35.6373	9.07055	12.0843	7.94263	21.9144	18.0389	20.5568	10.2559	40.6416	28.6075	21.4763	26.8443	27.6773	13.5613
Acinetobacter_johnsonii	3.82109	13.1565	3.11668	5.01245	7.29241	8.75355	3.44203	9.95674	8.28873	9.9086	14.6777	1.29924	5.92056	4.41654	3.00114	12.3153	1.88047	7.48121	2.50058	7.60627	1.0043	13.5095	11.1333	13.1044	11.6037	4	6.04986	8.66853	4.03135	46.6109	10.1088	8.21791	3.00648	5.36264	9.23032	7.56122	15.6041	7.15877	6.71108	11.8617	7.30226
Falco_peregrinus	88.8402	77.9993	63.3725	148.368	150.015	226.498	163.496	155.989	101.725	163.942	158.786	145.515	129.829	86.1225	137.302	204.289	71.4578	113.287	92.5214	96.7083	136.585	129.091	197.615	135.139	142.814	40	108.898	248.498	109.854	60.4215	131.414	108.659	79.6716	85.8022	126.148	166.347	98.826	70.7923	186.792	205.603	147.088
Amorphotheca_resinae	10.508	25.3733	10.3889	12.0299	19.7937	4.37677	22.3732	19.9135	14.3169	8.10704	16.012	11.6932	11.4182	13.2496	18.7572	10.8665	9.40234	11.7562	9.16878	20.6456	17.0731	18.0127	53.5788	16.3805	16.0666	9	15.1247	26.0056	10.0784	20.7159	14.4411	13.6965	10.5227	14.3004	19.4862	10.3967	28.6075	7.15877	31.3184	6.91933	4.17272
Pinus_taeda	1172.12	2203.71	866.437	1492.71	1991.87	1443.24	1677.99	1815.45	965.26	1178.22	2224.33	853.6	1061.47	783.935	1671.64	1727.77	1271.2	1031.34	958.555	884.501	1527.54	2373.92	2035.3	1756.81	1564.71	831	1286.6	3033.02	1142.89	1633.11	1042.65	1608.89	1650.56	1171.74	1070.72	1581.24	2778.83	1364.14	2347.76	1851.42	1342.57
Delftia_sp._JD2	40.1214	10.3373	67.5281	3.00747	130.222	150.999	21.5127	233.983	27.1267	145.026	181.469	57.1665	40.1752	36.4364	57.0217	137.642	52.6531	80.1558	103.357	55.4171	6.02579	12.0085	8.34995	10.6473	205.296	60	59.4903	10.5949	46.3606	122.569	19.4955	4.56551	88.691	1.78755	89.2265	1.8903	269.171	50.1114	109.614	101.813	5.2159
Amaranthus_hypochondriacus	12.4185	11.277	12.4667	16.0398	21.8772	12.0361	10.3261	18.254	13.5634	21.6188	29.3553	6.4962	14.3785	11.0413	12.0046	5.79545	15.0437	11.7562	7.50173	17.3858	11.0473	15.7611	39.6622	22.9327	10.7111	14	12.0997	32.7478	15.1176	24.1686	6.49851	15.5227	33.0712	14.3004	12.3071	13.2321	41.611	19.0901	12.3037	14.8271	12.5182
Pogonus_chalceus	33.4345	63.903	29.089	55.1369	65.6317	43.7677	43.0254	51.4431	18.0845	44.1383	80.06	24.6856	38.9065	19.8744	39.0149	31.1505	45.1312	39.5435	35.0081	15.2125	33.1419	93.816	61.9288	54.0557	59.8036	29	42.349	485.438	28.2195	51.7898	36.1029	44.742	76.6651	34.8571	26.6654	54.8188	113.13	69.2014	73.8219	30.6428	42.7704
Euplotes_focardii	11.4633	18.795	5.19447	14.0349	12.5013	4.37677	4.30254	13.2756	10.5493	7.20626	14.6777	3.89772	2.11449	3.3124	10.504	5.79545	9.40234	11.7562	1.66705	8.69289	2.0086	15.0106	11.8291	9.82832	5.35554	12	10.0831	18.3002	5.03919	12.0843	3.61029	13.6965	19.5421	8.04396	5.12796	2.83546	18.2048	21.4763	13.4222	24.7119	8.34544
Castanea_mollissima	201.562	124.047	121.551	255.635	191.686	180.542	162.636	169.265	148.444	221.592	200.15	142.916	159.855	472.57	691.764	194.872	161.72	91.912	134.198	88.0155	381.634	262.685	191.353	859.978	156.203	120	114.947	296.656	179.395	132.927	216.617	128.747	198.427	211.824	263.577	114.363	211.956	263.284	107.377	120.594	159.607
Psammomys_obesus	1669.81	1910.51	1607.17	1619.02	1697.05	1726.64	1506.75	1934.93	1527.39	1469.18	1912.1	1552.59	1685.67	1713.62	1604.86	1647.36	1733.79	1835.03	1515.35	1777.7	1580.77	1456.03	2385.3	1516.02	1692.35	1565	1710.09	2034.21	1637.74	1857.53	1482.38	1590.62	1764.8	1512.26	1573.26	1599.2	2084.45	1994.91	1715.8	1919.62	1584.59
3300006735_____Ga0098038_1002162	14.3291	9.3975	11.4278	4.00996	18.7519	22.9781	12.0471	24.8918	7.53521	25.2219	14.6777	28.5833	19.4533	4.41654	13.5051	21.0085	15.0437	13.8937	15.837	9.7795	14.0602	24.7674	13.2207	19.6566	17.8518	12	10.0831	5.77902	13.1019	13.8106	10.8309	10.0441	15.0324	20.5568	27.691	4.72576	16.9045	11.1359	23.4888	23.7234	16.6909
Proctacanthus_coquilletti	37.2556	68.6018	67.5281	37.0921	23.9608	33.92	50.7699	71.3566	22.6056	19.8172	65.3823	20.7878	26.6425	43.0612	49.5189	33.3238	39.4898	39.5435	61.6809	58.677	40.172	49.5349	43.8372	31.123	35.7036	37	101.839	154.107	22.1724	48.3372	13.7191	17.3489	45.0971	27.707	26.6654	57.6543	72.8192	51.7022	79.4145	60.297	14.6045
Pimephales_promelas	72.6006	100.553	51.9447	73.1818	142.723	85.3471	82.6087	124.459	44.4577	120.705	138.771	48.0719	58.7827	32.0199	81.7812	63.7499	62.0555	47.0247	52.5121	60.8502	46.1977	147.854	90.4578	93.369	85.6887	48	75.6233	157.96	68.533	84.5901	46.9337	96.7888	112.743	58.0952	72.817	123.815	157.341	73.1785	155.473	124.548	73.0226
3300009155_____Ga0114968_10003598	93.6166	97.734	6502.43	106.264	1823.1	122.55	12.0471	164.286	77.6126	36539.3	54.7077	1262.86	18.6075	8.83308	28.5109	55.7812	109.067	74.8121	47.511	35.8582	81.3482	24889.8	23359	31.942	1067.54	6	5.04155	15.4107	2.01568	75.9584	57.0425	1372.39	6.01295	7.15018	9.23032	49.1479	33732.2	3328.83	134.222	292.589	1072.39
Capsella_bursa-pastoris	6.6869	7.518	8.31115	13.0324	11.4595	8.75355	7.74457	24.8918	6.78169	16.2141	25.3523	9.09468	8.45794	7.72894	11.2543	11.5909	18.8047	9.61869	6.66821	3.25983	9.03869	18.7632	10.4374	7.37124	14.2814	9	13.108	19.2634	15.1176	10.358	7.94263	12.7834	24.0518	8.04396	5.12796	10.3967	22.1058	11.1359	13.4222	6.91933	12.5182
Halyomorpha_halys	120.364	167.276	74.8003	119.296	189.603	80.9703	133.379	190.837	62.5422	111.697	198.816	66.2612	106.993	65.1439	96.0366	86.2073	152.318	92.9807	74.1838	79.3226	106.456	226.66	165.607	186.738	99.9701	66	112.931	355.41	78.6114	148.464	58.4866	92.2233	220.976	92.9524	69.7402	144.608	273.072	121.699	134.222	145.306	97.0158
Prunus_mume	14.3291	9.3975	7.27225	18.0448	15.6266	7.65935	6.88406	6.63782	3.01408	11.7102	16.012	12.9924	9.30374	9.93721	42.7663	10.8665	1.88047	12.8249	4.16763	4.34644	11.0473	27.7695	16.6999	19.6566	12.4963	5	11.0914	20.2266	12.0941	31.0739	4.33234	15.5227	16.5356	8.04396	14.3583	11.3418	23.4062	11.9313	11.1851	13.8387	25.0363
Geosmithia_morbida	5.73163	12.2168	8.31115	12.0299	14.5848	9.84774	11.1866	19.9135	3.01408	14.4125	21.3493	9.09468	5.49766	4.41654	11.2543	8.69317	5.64141	2.13749	7.50173	4.34644	11.0473	38.2769	4.17497	12.2854	11.6037	12	15.1247	23.1161	6.04703	10.358	5.77646	10.0441	9.01943	2.68132	6.15355	10.3967	36.4096	3.18168	19.0147	5.93086	3.12954
Umbilicaria_muehlenbergii	6.6869	8.45775	1.03889	4.00996	6.25064	12.0361	6.88406	14.9351	4.52112	9.9086	13.3433	7.79544	3.80607	9.93721	12.7549	7.96874	1.88047	1.06874	0.833526	0	9.03869	9.00634	6.26246	31.123	0.892591	1	1.00831	9.6317	5.03919	3.45266	20.9397	5.47861	3.00648	1.78755	8.20473	7.56122	10.4027	17.4992	5.59257	3.9539	5.2159
Octopus_bimaculoides	363.958	758.379	421.791	603.499	701.113	568.98	606.658	761.69	330.796	565.691	660.495	354.692	378.07	279.346	448.671	431.036	415.584	402.916	440.935	378.141	481.059	917.896	635.292	778.075	882.772	373	576.754	960.28	381.971	517.898	443.343	480.291	530.643	410.242	409.211	605.843	908.94	383.392	650.975	730.484	478.82
Apostichopus_parvimensis	43.9425	62.0235	59.2169	40.0996	80.2165	36.1084	37.8623	48.1242	18.0845	117.102	54.7077	31.1818	39.7523	43.0612	26.26	117.358	62.0555	30.9936	32.5075	28.2519	22.0946	159.112	106.462	46.6845	43.7369	23	47.3906	56.827	30.2352	55.2425	58.4866	40.1765	70.6522	31.282	24.6142	71.8316	211.956	50.1114	42.5035	52.3892	50.0727
Anopheles_punctulatus	48.7188	112.77	31.1668	70.1743	69.7988	47.0503	100.679	76.335	30.1408	24.3211	56.042	22.0871	26.6425	20.9786	51.0194	51.4346	35.7289	35.2685	28.3399	22.8188	59.2536	62.2939	47.3164	23.7518	20.5296	19	48.3989	163.739	34.2665	53.5162	25.272	46.5682	49.6069	63.4579	22.563	103.967	92.3243	54.8839	89.4811	108.732	38.5977
Pelomonas_puraquae	17.1949	8.45775	35.3224	7.01743	73.9659	89.7238	8.60507	142.713	12.8099	71.1618	61.3793	41.5757	24.1051	20.9786	20.2577	70.2698	22.5656	48.0935	41.6763	39.118	3.0129	9.75687	8.34995	14.7425	76.7628	32	35.2909	10.5949	14.1097	50.0635	20.9397	6.39171	31.568	3.57509	41.0237	1.8903	80.6213	27.8397	43.622	48.4353	3.12954
Durio_zibethinus	100.303	129.686	86.2282	114.284	148.974	73.3109	107.563	146.032	68.5704	123.407	125.427	106.538	86.271	73.977	218.333	74.6164	122.23	81.2245	84.1861	63.0234	117.503	157.611	117.595	183.462	91.9368	81	111.922	168.555	78.6114	96.6744	107.587	84.0054	138.298	98.315	113.841	120.034	140.437	528.953	153.236	117.629	104.318
Heterococcus_sp._DN1	15.2843	13.1565	9.35004	16.0398	14.5848	16.4129	10.3261	6.63782	14.3169	14.4125	6.67167	9.09468	10.5724	4.41654	9.75372	13.0398	9.40234	11.7562	5.83468	10.8661	6.02579	12.759	16.0041	27.0279	5.35554	3	15.1247	8.66853	14.1097	8.63164	7.22057	12.7834	16.5356	13.4066	5.12796	10.3967	9.1024	17.4992	19.0147	17.7926	5.2159
Marssonina_coronariae	2.86581	1.8795	3.11668	5.01245	9.37596	5.47097	1.72101	4.97837	1.50704	6.30548	8.006	5.19696	2.53738	5.52067	81.0309	5.07102	1.88047	1.06874	3.3341	3.25983	3.0129	7.50528	6.26246	6.55221	3.57036	0	0	5.77902	3.02352	3.45266	2.16617	0	3.00648	3.57509	5.12796	0.945152	6.50171	7.95419	11.1851	1.97695	3.12954
Catajapyx_aquilonaris	86.9297	238.697	103.889	27.0672	186.477	330.446	191.893	185.859	162.76	110.796	249.52	109.136	125.6	145.746	230.338	205.738	90.2625	88.7057	14.1699	121.7	143.615	248.425	280.419	98.2832	190.122	106	155.28	456.542	105.823	117.39	96.0336	170.75	148.821	156.41	127.173	26.4643	287.376	139.994	252.784	257.004	137.7
Amphilophus_citrinellus	76.4217	222.721	79.9948	136.339	184.394	206.803	130.797	230.664	67.8169	169.347	222.834	129.924	115.874	75.0811	153.058	168.068	97.7844	78.0183	90.0208	82.5824	77.331	265.687	180.22	149.882	149.955	58	88.7313	318.809	97.7603	164.001	90.2571	145.183	151.827	95.6337	112.815	174.853	302.98	132.835	233.769	180.891	147.088
Stramenopiles_sp._TOSAG41-1	423.185	3350.21	1895.98	1813.5	1330.34	3326.35	2871.51	3282.4	1467.1	1741.21	110.75	1605.86	2146.2	1540.27	3246.49	2977.41	1256.15	2402.54	2728.96	1961.33	2035.71	2692.15	3534.11	1492.27	1870.87	620	3223.57	4539.42	2068.08	2558.42	1721.38	1757.72	1077.82	1868.88	2373.22	3317.48	3126.02	2464.21	69.3479	4237.6	1671.17
Priapulus_caudatus	36.3003	29.1323	50.9058	42.1046	51.0469	20.7897	22.3732	48.1242	16.5775	71.1618	37.3613	41.5757	43.1355	39.7488	33.7629	28.2528	41.3703	27.7873	25.0058	33.6849	11.0473	123.837	66.1037	29.4849	35.7036	31	43.3574	53.9375	35.2744	53.5162	18.0514	29.2193	58.6263	15.1941	32.8189	32.1352	122.232	50.9068	34.6739	28.6658	32.3386
Heligmosomoides_polygyrus	44.8978	101.493	19.739	65.1618	69.7988	63.4632	60.2355	68.0377	21.8521	58.5508	100.075	14.2916	36.792	13.2496	77.2795	52.8834	41.3703	14.9624	27.5064	18.4724	44.1891	123.837	84.1953	91.7309	19.637	20	25.2078	187.818	43.3371	86.3164	11.5529	27.393	66.1425	41.1136	54.3564	108.693	136.536	40.5664	123.037	47.4468	30.2522
Bradyrhizobium_sp._UFLA03-84	5.73163	2.81925	5.19447	6.01494	14.5848	21.8839	5.16304	24.8918	2.26056	24.3211	14.6777	6.4962	5.49766	5.52067	7.50286	21.0085	9.40234	13.8937	16.6705	11.9527	1.0043	3.00211	2.78332	4.91416	11.6037	7	8.06648	3.85268	2.01568	10.358	6.49851	6.39171	4.50971	4.46886	8.20473	1.8903	29.9079	9.54503	12.3037	14.8271	2.08636
Loxodonta_africana	5063.89	5104.72	3896.89	5754.29	5099.48	3904.08	5055.48	4495.47	3645.53	4571.47	5090.48	4899.43	4445.07	4303.92	4543.73	3927.14	5062.22	3812.21	4422.69	4060.66	5276.59	4900.2	4627.96	5747.11	4589.7	4702	3696.47	4256.25	4539.3	5299.83	4593.73	4239.53	4929.12	4870.17	4824.38	5140.68	4586.31	4469.46	3969.61	4866.27	5352.56
Phalacrocorax_carbo	26.7476	48.867	25.9723	42.1046	60.4228	52.5213	40.4438	46.4648	24.1127	53.1462	48.036	27.284	25.7967	14.3537	38.2646	32.5994	26.3266	35.2685	30.0069	13.0393	31.1333	93.816	56.3621	66.3411	65.1591	24	48.3989	86.6853	26.2038	44.8845	49.8219	37.4372	52.6133	25.9194	33.8445	49.1479	96.2254	21.4763	58.1627	53.3777	35.4681
Mycolicibacterium_houstonense	10.508	22.554	0	23.0573	36.4621	20.7897	0.860507	14.9351	1.50704	1.80156	29.3553	5.19696	16.9159	9.93721	30.7617	12.3153	7.52187	12.8249	13.3364	18.4724	12.0516	29.2706	17.3957	16.3805	17.8518	14	2.01662	40.4531	14.1097	13.8106	1.44411	12.7834	4.50971	15.1941	16.4095	14.1773	22.1058	15.113	35.7924	18.781	12.5182
Gorilla_gorilla	187703	186148	191121	184596	352179	175440	201437	205826	173955	179711	204579	174466	180346	175090	189329	175153	194038	193716	232591	179083	197824	196315	189114	191457	210454	176885	198716	177155	194904	189117	184465	181497	192199	172761	186400	212000	197227	169691	205606	188650	172057
Ailuropoda_melanoleuca	1391.83	1718.8	1470.03	1505.74	1653.29	1651.14	1431.88	1679.37	1130.28	1591.68	1665.25	1443.46	1471.68	1374.65	1385.78	1480.01	1412.23	1472.73	1369.48	1390.86	1368.86	1976.89	1572.57	1734.7	1773.58	1350	1397.52	1987.98	1465.4	1696.98	1249.16	1279.26	1461.15	1190.51	1417.37	1664.41	2074.05	1434.94	1847.79	1651.74	1275.81
Vaccinium_macrocarpon	28.6581	67.662	20.7779	55.1369	64.5899	42.6735	51.6304	73.0161	24.8662	43.2375	70.7197	32.481	44.8271	25.3951	54.0206	45.6391	45.1312	28.8561	21.6717	32.5983	25.1075	87.0613	70.2787	67.9792	39.274	31	36.2992	118.47	54.4233	65.6005	33.9367	37.4372	63.136	40.2198	24.6142	56.7091	92.3243	50.9068	74.9404	48.4353	42.7704
Pyrus_x_bretschneideri	74.5112	80.8185	72.7225	84.2091	75.0077	35.0142	68.8406	74.6755	60.2817	52.2454	64.048	37.6779	71.8925	41.9571	63.024	47.8124	54.5336	63.0559	59.1803	69.5431	71.3052	92.315	95.3286	90.0929	74.9776	60	66.5485	119.433	57.4468	84.5901	57.0425	59.3516	60.1295	61.6703	58.4587	68.9961	124.833	44.5435	68.2293	46.4584	94.9294
Endocarpon_pusillum	35.345	133.445	27.0112	38.0946	71.8823	59.0864	33.5598	64.7188	54.2535	21.6188	98.7407	33.7802	65.9719	49.686	94.536	59.4033	45.1312	22.4436	22.5052	46.7243	36.1548	72.8013	65.4079	76.1694	52.6628	56	23.1911	140.623	36.2822	65.6005	31.7705	56.6123	39.0842	80.4396	62.5611	33.0803	91.024	78.7465	95.0737	87.9744	71.9794
Themira_minor	6.6869	4.69875	4.15557	7.01743	16.6684	3.28258	5.16304	9.95674	7.53521	7.20626	9.34033	1.29924	7.18925	7.72894	8.25315	11.5909	9.40234	2.13749	3.3341	5.43305	12.0516	12.759	22.2665	12.2854	3.57036	2	13.108	18.3002	4.03135	6.90531	8.66468	9.13102	15.0324	5.36264	1.02559	11.3418	20.8055	9.54503	11.1851	9.88476	8.34544
Aquilaria_agallochum	32.4792	37.59	25.9723	25.0622	58.3393	29.5432	25.8152	43.1459	15.8239	43.2375	62.7137	23.3863	29.1799	18.7703	32.2623	28.2528	35.7289	24.5811	32.5075	22.8188	36.1548	69.7991	54.9705	39.3133	32.1333	11	40.3324	59.7165	33.2587	36.2529	25.9941	21.9144	76.6651	25.9194	28.7166	31.19	67.6178	34.9984	53.6887	31.6312	38.5977
Aethina_tumida	41.0767	28.1925	43.6335	41.1021	46.8798	41.5793	43.8859	39.8269	31.6479	52.2454	49.3703	55.8673	60.4743	49.686	39.7652	36.946	50.7727	35.2685	45.8439	33.6849	39.1677	66.0465	35.4873	45.8655	31.2407	36	41.3407	84.7589	43.3371	44.8845	37.547	33.7848	90.1943	33.0696	38.9725	35.9158	67.6178	35.7938	41.385	46.4584	53.2022
Nicotiana_tabacum	17.1949	22.554	11.4278	21.0523	28.1279	21.8839	15.4891	28.2108	13.5634	33.3289	20.015	10.3939	19.4533	7.72894	21.7583	10.142	30.0875	14.9624	12.5029	11.9527	18.0774	59.2917	35.4873	16.3805	21.4222	13	17.1413	58.7534	27.2116	24.1686	17.3294	21.0013	43.5939	15.1941	19.4862	19.8482	62.4165	32.6122	22.3703	20.758	17.7341
Hymenolepis_nana	5.73163	8.45775	12.4667	6.01494	17.7101	6.56516	13.7681	19.9135	6.02817	18.0156	13.3433	7.79544	5.92056	2.20827	5.252	7.96874	11.2828	9.61869	10.8358	3.25983	11.0473	16.5116	18.7874	13.9234	10.7111	7	11.0914	9.6317	6.04703	13.8106	10.8309	10.0441	21.0453	9.8315	12.3071	7.56122	46.8123	13.5221	10.0666	8.89628	13.5613
Babjeviella_inositovora	3.82109	5.6385	1.03889	8.01992	10.4177	8.75355	7.74457	14.9351	4.52112	9.9086	10.6747	5.19696	4.65187	0	4.50172	18.8352	1.88047	0	0	0	7.03009	11.2579	6.26246	11.4664	2.67777	0	1.00831	7.70536	7.05487	10.358	7.22057	11.8703	9.01943	4.46886	5.12796	6.61607	13.0034	3.18168	10.0666	0	4.17272
Burkholderia_pseudomallei	21.9712	29.1323	20.7779	19.0473	32.295	36.1084	20.6522	28.2108	18.0845	36.0313	36.027	35.0795	37.6378	15.4579	49.5189	41.2926	31.968	23.5124	17.504	24.992	19.0817	26.2685	25.7457	25.3898	17.8518	21	24.1995	53.9375	35.2744	41.4319	10.1088	15.5227	27.0583	9.8315	27.691	24.574	33.8089	38.9755	53.6887	47.4468	25.0363
Cephus_cinctus	147.112	193.589	123.628	226.563	105.219	19.6955	166.938	28.2108	9.79577	143.224	92.069	115.632	16.0701	59.6233	191.323	12.3153	39.4898	27.7873	53.3457	78.236	112.481	64.5454	707.658	26.2088	116.929	9	129.064	192.634	10.0784	170.906	114.085	17.3489	25.555	241.319	126.148	97.3507	198.952	89.8823	124.155	24.7119	18.7772
Pediococcus_acidilactici	63.0479	30.072	20.7779	48.1195	36.4621	61.2748	34.4203	61.3999	49.7324	31.5274	37.3613	50.6703	69.3551	36.4364	48.0183	24.6306	56.4141	34.1998	45.8439	32.5983	82.3525	42.0296	23.6582	29.4849	41.9518	35	29.241	26.9688	31.243	37.9792	31.7705	18.262	36.0777	49.1575	64.6123	21.7385	26.0069	26.2488	62.6368	27.6773	46.9431
Acidomyces_richmondensis	2.86581	0.93975	4.15557	1.00249	1.04177	1.09419	1.72101	3.31891	0.753521	0.900782	4.003	1.29924	1.69159	460.424	14.2554	0.724431	1.88047	2.13749	3.3341	4.34644	313.341	1.50106	1.39166	212.128	1.78518	0	7.05817	0.96317	0	0	0	0	0	0	2.05118	1.8903	2.60069	0	0	0.988476	1.04318
Rhabditophanes_sp._KR3021	12.4185	12.2168	10.3889	12.0299	10.4177	6.56516	5.16304	9.95674	9.04225	14.4125	8.006	10.3939	9.30374	2.20827	8.25315	8.69317	7.52187	13.8937	7.50173	6.51966	9.03869	12.0085	10.4374	5.73318	8.03332	6	18.1496	14.4475	16.1254	8.63164	14.4411	11.8703	12.0259	14.3004	6.15355	5.67091	15.6041	15.9084	7.8296	6.91933	11.475
Chromera_velia	19.1054	29.1323	30.1279	29.0722	27.0861	15.3187	18.9312	18.254	19.5915	43.2375	17.3463	25.9848	24.1051	24.291	20.2577	18.1108	7.52187	20.3061	20.8381	22.8188	16.0688	39.778	32.704	21.2947	31.2407	22	17.1413	34.6741	24.1881	22.4423	24.5499	23.7406	13.5291	14.3004	16.4095	16.0676	37.7099	13.5221	35.7924	11.8617	18.7772
Mesorhizobium_sp._L103C105A0	4.77636	4.69875	6.23336	14.0349	17.7101	10.9419	14.6286	14.9351	4.52112	7.20626	12.009	6.4962	14.3785	2.20827	13.5051	6.51988	15.0437	12.8249	10.0023	4.34644	6.02579	8.25581	11.8291	9.00929	7.14072	2	8.06648	10.5949	13.1019	15.537	5.0544	4.56551	7.51619	8.04396	11.2815	9.45152	9.1024	6.36335	17.8962	6.91933	13.5613
3300009642_____Ga0123331_1005379	8.59744	8.45775	3.11668	2.00498	14.5848	6.56516	0.860507	6.63782	5.27465	33.3289	1.33433	9.09468	1.69159	1.10413	0.750286	2.17329	9.40234	4.27497	2.50058	2.17322	5.02149	33.7738	15.3082	1.63805	13.3889	0	0	0.96317	0	5.17898	3.61029	13.6965	1.50324	0	0	5.67091	20.8055	3.97709	3.35554	0	9.38862
Tyzzerella_nexilis	9.55271	6.57825	12.4667	10.0249	15.6266	15.3187	20.6522	1.65946	8.28873	20.718	10.6747	15.5909	7.61215	9.93721	10.504	13.0398	22.5656	13.8937	15.837	6.51966	15.0645	17.2622	4.17497	27.0279	14.2814	16	6.04986	4.81585	18.1411	3.45266	12.997	7.30481	9.01943	19.663	13.3327	16.0676	10.4027	7.95419	14.5407	11.8617	15.6477
Ictidomys_tridecemlineatus	3526.86	2873.76	3606	3016.49	3205.54	4115.26	2617.66	3023.53	3221.3	4273.31	3076.97	4357.65	4168.92	3813.68	3191.72	3667.79	3749.65	3520.44	2964.02	3686.87	2860.24	2950.33	4291.18	2905.09	3157.99	3550	3399.01	2914.55	3660.47	3664.99	3011.7	2563.99	3639.34	2869.01	3884.94	2705.03	3087.01	3667.68	3071.44	2789.48	2870.83
Mus_pahari	3429.42	1966.9	2739.56	2518.25	2926.34	2409.41	1956.79	2062.7	2824.2	3506.75	1960.14	3598.89	3293.95	2998.83	2352.9	2319.63	3234.41	2789.42	2249.69	2887.12	2427.39	1780.25	1928.84	2330.95	2415.35	3289	2321.13	1540.11	3007.39	4277.84	2681	2144.88	3956.52	2382.8	3131.13	2002.78	2196.28	2763.28	1654.28	1795.07	2744.61
Lepidothrix_coronata	40.1214	59.2043	46.7502	59.1469	68.757	40.4851	45.6069	66.3782	27.8803	69.3602	62.7137	36.3787	37.6378	29.8116	44.2669	34.7727	48.8922	42.7497	42.5098	42.3778	36.1548	85.5602	57.7538	45.8655	67.8369	35	50.4155	72.2377	62.486	77.6848	28.8823	57.5254	48.1036	33.9634	32.8189	61.4349	149.539	59.6564	63.7553	49.4238	40.684
3300018428_____Ga0181568_10001580	50.6294	0	201.545	80.1992	114.595	145.528	86.9112	109.524	58.7746	47.7415	86.7317	63.6627	36.792	189.911	90.7846	136.917	43.2508	281.08	309.238	221.669	79.3396	1.50106	164.216	67.9792	273.133	4	342.826	127.138	63.4938	1.72633	73.6498	76.7005	36.0777	75.0769	58.4587	116.254	0	0.795419	125.274	139.375	69.8931
Latrodectus_hesperus	106.99	183.251	74.8003	121.301	179.185	101.76	117.89	182.54	57.2676	144.125	149.445	105.238	131.521	44.1654	122.297	119.531	125.991	87.637	66.6821	69.5431	98.4213	202.643	131.512	172.815	111.574	56	83.6898	263.909	93.729	132.927	94.5895	129.66	181.892	89.3773	107.687	134.212	209.355	125.676	162.185	131.467	124.138
Clonorchis_sinensis	23.8818	50.7465	19.739	42.1046	83.3418	41.5793	35.2808	29.8702	15.0704	46.8407	101.409	25.9848	57.0911	54.1026	81.7812	50.7102	33.8484	28.8561	34.1746	54.3305	38.1634	83.3086	50.7955	75.3504	73.1924	26	24.1995	143.512	30.2352	50.0635	25.9941	39.2634	72.1554	66.1392	61.5355	47.2576	66.3175	73.1785	128.629	114.663	71.9794
Eristalis_dimidiata	11.4633	16.9155	10.3889	12.0299	17.7101	3.28258	12.0471	19.9135	6.78169	9.00782	21.3493	9.09468	11.4182	4.41654	14.2554	7.96874	7.52187	12.8249	5.83468	6.51966	17.0731	28.5201	84.8911	25.3898	12.4963	7	15.1247	38.5268	17.1333	13.8106	7.94263	11.8703	25.555	11.619	12.3071	8.50637	27.3072	26.2488	10.0666	21.7465	13.5613
Exaiptasia_pallida	49.6741	66.7223	46.7502	65.1618	80.2165	33.92	55.0725	54.7621	18.0845	39.6344	84.063	37.6779	50.7477	36.4364	63.024	26.8039	37.6094	28.8561	45.8439	29.3385	54.2321	72.8013	50.7955	61.427	76.7628	26	39.3241	84.7589	42.3292	60.4215	33.2146	39.2634	64.6392	40.2198	71.7914	49.1479	78.0206	27.8397	63.7553	41.516	51.1158
Arabis_nordmanniana	15.2843	30.072	22.8557	19.0473	34.3785	16.4129	29.2572	28.2108	10.5493	20.718	26.6867	14.2916	18.6075	12.1455	12.0046	11.5909	18.8047	21.3749	14.1699	16.2992	16.0688	35.2748	32.704	30.304	13.3889	28	25.2078	156.034	28.2195	34.5266	12.275	23.7406	49.6069	19.663	23.5886	22.6837	48.1127	49.316	20.1333	21.7465	21.9068
Xanthomonas_phaseoli	57.3163	31.0118	49.8669	58.1444	1010.52	27.3548	42.1649	26.5513	24.8662	16.2141	29.3553	797.733	47.3645	79.4977	54.7709	21.7329	56.4141	42.7497	45.0104	55.4171	63.2708	10.5074	11.1333	49.1416	620.35	74	76.6316	101.133	58.4546	50.0635	31.0485	780.702	102.22	59.8828	42.0493	36.8609	26.0069	36.5893	26.8443	140.364	749.004
Cryomyces_antarcticus	4.77636	1.8795	1.03889	4.00996	6.25064	10.9419	0.860507	13.2756	5.27465	4.50391	16.012	2.59848	3.38318	6.62481	138.803	3.62215	1.88047	1.06874	1.66705	0	3.0129	3.75264	2.78332	26.2088	2.67777	1	1.00831	9.6317	3.02352	10.358	46.9337	2.7393	1.50324	0.893773	3.07677	2.83546	16.9045	63.6335	8.94811	2.96543	1.04318
Drosophila_virilis	13.3738	11.277	9.35004	10.0249	27.0861	10.9419	6.88406	9.95674	5.27465	27.0235	13.3433	10.3939	9.72663	9.93721	11.2543	12.3153	18.8047	6.41246	5.00115	6.51966	6.02579	30.0211	105.07	9.82832	9.8185	8	15.1247	323.625	8.06271	13.8106	12.275	12.7834	10.5227	10.7253	8.20473	10.3967	45.512	23.8626	8.94811	9.88476	19.8204
Chlamydomonas_reinhardtii	11.4633	13.1565	17.6612	12.0299	29.1696	13.1303	12.9076	29.8702	14.3169	39.6344	10.6747	25.9848	20.2991	15.4579	22.5086	13.0398	18.8047	10.6874	23.3387	8.69289	10.043	39.778	22.9624	9.82832	26.7777	20	24.1995	17.3371	22.1724	15.537	4.33234	10.9572	21.0453	6.25641	20.5118	9.45152	91.024	16.7038	14.5407	8.89628	14.6045
Gardnerella_vaginalis	73.5559	100.553	103.889	118.294	159.391	61.2748	68.8406	121.14	61.0352	74.7649	130.765	67.5605	74.8528	64.0398	108.041	65.1988	95.9039	60.9184	66.6821	71.7163	84.3611	190.634	75.8453	102.378	144.6	58	105.873	89.5748	77.6036	94.948	93.8674	101.354	79.6716	105.465	131.276	103.022	122.232	488.387	137.577	93.9052	70.9363
Guillardia_theta	16.2396	52.626	42.5946	33.0822	48.9633	26.2606	22.3732	46.4648	57.2676	36.9321	33.3583	28.5833	26.6425	44.1654	63.7743	29.7017	47.0117	11.7562	20.0046	31.5117	28.1204	39.778	39.6622	30.304	21.4222	28	55.4571	49.1217	20.1568	32.8002	55.5984	26.4799	34.5745	53.6264	21.5374	51.9834	41.611	20.6809	19.0147	30.6428	43.8136
Helotiales_sp._F229	5.73163	7.518	5.19447	3.00747	6.25064	4.37677	4.30254	13.2756	5.27465	5.40469	5.33733	3.89772	5.49766	9.93721	7.50286	2.89772	3.76094	3.20623	3.3341	3.25983	10.043	11.2579	12.5249	16.3805	6.24813	6	3.02493	10.5949	3.02352	0	2.16617	5.47861	7.51619	6.25641	5.12796	8.50637	18.2048	6.36335	8.94811	8.89628	3.12954
Penaeus_monodon	158.575	460.478	184.923	343.854	322.95	211.179	299.457	394.951	134.88	335.992	380.285	170.2	156.049	144.642	257.348	185.454	203.091	191.305	248.391	185.81	216.929	538.879	341.652	271.098	308.836	142	214.77	508.554	166.293	243.412	193.511	245.624	196.924	145.685	178.453	338.365	560.448	197.264	362.399	278.75	223.241
Nocardia_flavorosea	55.4057	0	17.6612	0	27.0861	12.0361	0	29.8702	44.4577	50.4438	6.67167	61.0643	42.7126	22.0827	47.268	21.7329	47.0117	23.5124	28.3399	16.2992	0	0	0.695829	0	28.5629	24	25.2078	0	44.3449	27.6212	4.33234	0	31.568	0.893773	66.6635	0	16.9045	18.2946	15.6592	13.8387	0
Taxomyces_andreanae	6.6869	16.9155	22.8557	10.0249	8.33418	8.75355	17.2101	24.8918	5.27465	2.70235	21.3493	11.6932	9.72663	14.3537	15.0057	17.3863	22.5656	4.27497	11.6694	13.0393	6.02579	9.75687	11.1333	7.37124	8.92591	6	26.2161	20.2266	4.03135	20.7159	7.94263	6.39171	22.5486	19.663	8.20473	24.574	29.9079	13.5221	21.2518	10.8732	8.34544
Acanthamoeba_lenticulata	8.59744	15.036	10.3889	8.01992	21.8772	8.75355	12.0471	11.6162	7.53521	12.611	13.3433	3.89772	13.9556	7.72894	10.504	7.96874	9.40234	4.27497	4.16763	4.34644	2.0086	19.5137	18.0916	7.37124	16.9592	4	4.03324	8.66853	6.04703	5.17898	7.22057	9.13102	10.5227	8.04396	5.12796	13.2321	15.6041	7.15877	20.1333	5.93086	5.2159
Cercospora_sojina	25.7923	15.9758	29.089	26.0647	32.295	25.1664	26.6757	24.8918	15.0704	17.1149	40.03	20.7878	23.2593	28.7075	24.7594	24.6306	20.6852	30.9936	43.3433	21.7322	39.1677	22.5159	15.3082	20.4757	24.0999	28	21.1745	8.66853	36.2822	24.1686	18.7735	16.4358	19.5421	30.3883	29.7422	19.8482	18.2048	31.8168	19.0147	24.7119	34.425
Thelazia_callipaeda	8.59744	9.3975	6.23336	5.01245	14.5848	4.37677	10.3261	8.29728	6.78169	6.30548	14.6777	5.19696	9.30374	4.41654	2.25086	7.24431	9.40234	8.54995	5.00115	5.43305	8.03439	12.0085	137.774	12.2854	3.57036	7	4.03324	14.4475	8.06271	5.17898	4.33234	7.30481	15.0324	5.36264	4.10237	1.8903	13.0034	13.5221	3.35554	4.94238	4.17272
3300009425_____Ga0114997_10000566	16.2396	29.1323	14.5445	0	21.8772	25.1664	20.6522	36.508	12.0563	12.611	18.6807	7.79544	6.76635	7.72894	18.0069	21.7329	9.40234	11.7562	0	11.9527	21.0903	31.5222	46.6205	12.2854	15.174	13	14.1163	42.3795	6.04703	29.3476	16.6073	31.0455	10.5227	21.4505	12.3071	0	26.0069	32.6122	36.911	30.6428	22.95
Actinidia_chinensis	42.0319	51.6863	38.4391	31.0772	63.5482	33.92	28.3967	69.6972	30.8943	81.0704	57.3763	28.5833	35.1005	24.291	34.5132	32.5994	58.2945	41.681	30.8405	22.8188	37.1591	103.573	1021.48	58.9699	66.0517	20	45.374	82.8326	35.2744	56.9688	24.5499	42.9158	75.1619	25.0256	24.6142	32.1352	145.638	43.748	52.5702	46.4584	51.1158
Raffaelea_quercus-mongolicae	7.64217	0.93975	20.7779	2.00498	26.0443	19.6955	0	16.5946	9.79577	45.0391	14.6777	36.3787	24.1051	12.1455	9.75372	8.69317	3.76094	16.0312	14.1699	10.8661	1.0043	0	0	0.819026	10.7111	14	15.1247	1.92634	23.1803	8.63164	1.44411	0	15.0324	0.893773	48.2028	0	6.50171	6.36335	15.6592	8.89628	0
Selaginella_moellendorffii	8.59744	4.69875	9.35004	15.0373	9.37596	4.37677	2.58152	3.31891	2.26056	19.8172	12.009	5.19696	7.61215	2.20827	15.756	7.96874	9.40234	1.06874	3.3341	4.34644	6.02579	15.0106	13.2207	9.00929	5.35554	6	8.06648	15.4107	5.03919	5.17898	1.44411	7.30481	18.0389	4.46886	3.07677	5.67091	24.7065	17.4992	22.3703	5.93086	5.2159
Trichogramma_pretiosum	24.8371	30.072	19.739	20.0498	16.6684	19.6955	30.1178	38.1675	9.79577	23.4203	34.6927	18.1894	24.1051	8.83308	18.7572	18.1108	18.8047	21.3749	10.8358	16.2992	21.0903	33.0232	16.0041	21.2947	11.6037	12	19.1579	47.1953	23.1803	31.0739	11.5529	21.9144	25.555	25.0256	18.4606	20.7934	41.611	18.2946	39.148	35.5851	16.6909
Bos_taurus	2255.4	1252.69	2084.02	1317.27	3387.85	1613.93	1390.58	9531.92	886.14	1813.27	1627.89	3072.7	1396.41	1875.92	1695.65	941.76	1122.64	764.152	2441.4	2191.69	1542.6	2969.84	1738.88	2118.82	3365.96	2675	2750.67	1300.28	798.208	4441.84	1097.53	1245.47	2444.26	2002.94	1840.94	1468.77	1643.63	1304.49	1697.9	2967.4	5286.84
Elaeis_guineensis	180.546	420.068	247.257	239.595	314.615	374.214	297.736	348.486	182.352	212.585	352.264	136.42	150.974	196.536	281.357	285.426	180.525	197.718	261.727	216.236	224.963	297.96	241.453	267.003	307.051	171	343.834	522.038	207.615	195.075	197.122	235.58	180.389	167.136	179.479	354.432	384.901	211.581	501.094	299.508	151.261
Apis_dorsata	17.1949	50.7465	11.4278	30.0747	62.5064	17.5071	21.5127	41.4864	7.53521	36.0313	29.3553	9.09468	13.5327	12.1455	14.2554	20.2841	24.4461	16.0312	18.3376	14.1259	23.0989	57.7907	41.7497	31.123	28.5629	11	17.1413	59.7165	14.1097	29.3476	15.1632	29.2193	16.5356	15.1941	16.4095	29.2997	53.3141	12.7267	49.2146	34.5967	18.7772
Cercospora_cf._sigesbeckiae	48.7188	0.93975	4.15557	8.01992	8.33418	5.47097	0.860507	1.65946	28.6338	2.70235	4.003	1.29924	1.26869	618.315	5.252	2.17329	1.88047	6.41246	6.66821	4.34644	5.02149	5.2537	4.8708	820.664	9.8185	5	9.07479	14.4475	1.00784	3.45266	6.49851	0	1.50324	0.893773	2.05118	1.8903	0	46.1343	0	579.247	1.04318
Nematostella_vectensis	14.3291	12.2168	15.5834	8.01992	26.0443	10.9419	10.3261	11.6162	3.01408	17.1149	16.012	11.6932	9.72663	13.2496	14.2554	12.3153	7.52187	10.6874	6.66821	9.7795	11.0473	27.7695	30.6165	31.942	22.3148	16	14.1163	53.9375	5.03919	18.9896	7.22057	16.4358	30.0648	15.1941	6.15355	2.83546	42.9113	23.0671	8.94811	32.6197	13.5613
Herrania_umbratica	11.4633	11.277	16.6223	10.0249	12.5013	9.84774	14.6286	14.9351	7.53521	9.00782	13.3433	10.3939	17.7617	4.41654	10.504	13.7642	7.52187	16.0312	10.8358	5.43305	13.0559	24.7674	19.4832	9.00929	8.03332	8	17.1413	20.2266	9.07055	18.9896	7.22057	12.7834	19.5421	6.25641	6.15355	12.287	29.9079	11.9313	11.1851	15.8156	13.5613
Vicia_faba	10.508	28.1925	16.6223	19.0473	31.2532	18.6013	20.6522	14.9351	3.01408	10.8094	37.3613	6.4962	13.1098	5.52067	31.512	10.8665	20.6852	11.7562	5.00115	4.34644	13.0559	29.2706	14.6124	30.304	19.637	3	8.06648	37.5636	10.0784	15.537	6.49851	10.9572	15.0324	15.1941	20.5118	20.7934	29.9079	6.36335	52.5702	6.91933	20.8636
Apis_mellifera	315.24	234.938	217.129	287.715	193.77	200.237	190.172	129.438	247.908	201.775	165.457	278.037	385.259	261.68	163.562	176.037	376.094	162.449	134.198	183.637	352.509	138.848	155.17	207.214	114.252	321	159.313	109.801	282.195	284.844	239.723	208.187	303.654	244	198.965	205.098	145.638	212.377	99.5477	173.972	269.141
Eisenia_fetida	61.1374	77.9993	44.6724	56.1394	75.0077	43.7677	68.8406	54.7621	52.7465	50.4438	78.7257	33.7802	55.3995	48.5819	58.5223	39.8437	50.7727	51.2997	28.3399	49.9841	48.2063	92.315	83.4995	59.7889	58.0184	35	62.5153	96.317	58.4546	82.8637	46.9337	51.1337	94.704	44.6886	51.2796	59.5446	120.932	87.4961	80.533	207.58	41.7272
Neodiprion_lecontei	14.3291	28.1925	6.23336	32.0797	16.6684	7.65935	14.6286	19.9135	5.27465	25.2219	20.015	12.9924	13.5327	9.93721	7.50286	7.96874	9.40234	8.54995	5.00115	7.60627	9.03869	26.2685	38.2706	13.9234	19.637	4	12.0997	183.002	3.02352	17.2633	9.38674	11.8703	31.568	12.5128	5.12796	24.574	32.5086	9.54503	13.4222	19.7695	14.6045
Giraffa_tippelskirchi	2546.75	2176.46	2395.69	2194.45	2434.62	2116.17	2260.55	2417.83	2042.79	2524.89	2160.29	2543.91	2534	2327.52	2337.89	2241.39	2448.37	2614.15	2263.02	2501.38	1928.25	2440.72	1831.42	2484.11	2334.12	2479	2331.21	1958.12	2502.46	2591.22	2215.99	2259.93	2549.49	1875.14	2485.01	2142.66	2351.02	2481.71	2322.03	2261.63	2073.84
Spermophilus_dauricus	4441.06	3863.31	3914.55	4206.45	3472.23	4153.56	3341.35	3677.35	4275.48	4258.9	3365.19	4236.82	4769.43	4756.61	3432.56	3841.66	4631.59	4255.74	3632.51	4662.65	3888.65	3261.8	3186.2	3972.28	4471.88	4355	3341.54	3452.96	4213.77	4491.91	4109.23	3706.28	4536.77	3503.59	3958.78	3516.91	3915.33	4056.64	3691.1	2969.38	3829.52
Arthrobacter_sp._D2	18.1502	10.3373	18.7001	14.0349	21.8772	28.449	19.7917	34.8486	16.5775	15.3133	38.6957	23.3863	11.8411	5.52067	18.7572	22.4574	18.8047	20.3061	19.1711	8.69289	20.086	39.778	20.8749	36.8562	41.0592	12	15.1247	15.4107	14.1097	15.537	30.3264	15.5227	22.5486	19.663	11.2815	19.8482	20.8055	12.7267	24.6073	11.8617	19.8204
Malassezia_caprae	3.82109	4.69875	18.7001	14.0349	27.0861	14.2245	8.60507	4.97837	3.01408	41.436	9.34033	11.6932	2.53738	3.3124	5.252	63.7499	3.76094	11.7562	1.66705	0	1.0043	43.5306	33.3998	5.73318	133.889	1	1.00831	8.66853	38.2979	0	4.33234	0.913102	9.01943	2.68132	3.07677	5.67091	59.8158	7.95419	5.59257	9.88476	6.25908
Fraxinus_excelsior	58.2716	93.975	54.0225	69.1718	121.887	79.8761	32.6993	99.5674	38.4296	72.0626	108.081	49.3711	96.4205	48.5819	82.5315	84.034	97.7844	57.7122	57.5133	77.1494	30.129	105.074	98.8077	109.75	81.2257	77	68.5651	139.66	51.3998	119.117	51.2661	56.6123	124.769	59.8828	69.7402	68.9961	158.642	105.791	65.9923	89.9513	70.9363
Delftia_sp._RIT313	40.1214	7.518	64.4114	0	155.224	138.963	23.2337	200.794	26.3732	142.324	156.117	68.8597	43.1355	34.2282	48.0183	131.846	43.2508	86.5682	63.348	61.9368	2.0086	8.25581	6.26246	13.1044	147.277	61	79.6565	6.74219	45.3527	112.211	18.7735	6.39171	94.704	2.68132	83.0729	0.945152	241.864	49.316	95.0737	101.813	4.17272
Scaptodrosophila_lebanonensis	42.9872	87.3968	40.5168	84.2091	58.3393	44.8619	48.1884	82.9728	30.8943	52.2454	70.7197	24.6856	31.7173	26.4992	47.268	49.9857	41.3703	56.6434	41.6763	38.0314	50.2149	108.076	279.027	51.5987	49.0925	43	38.3158	96.317	36.2822	46.6109	36.1029	49.3075	28.5615	36.6447	38.9725	54.8188	123.533	76.3602	59.2812	94.8937	34.425
Lycaon_pictus	1363.17	1012.11	995.26	1194.97	1426.19	1047.14	1256.34	1106.86	1027.05	1125.98	1447.75	1168.02	1222.6	1174.8	1121.68	1017.1	1261.79	1056.99	959.388	1095.3	1017.35	1227.11	942.152	1233.45	1233.56	1112	1053.68	983.396	1180.18	1318.91	1316.31	1099.37	1530.3	897.348	1126.1	1067.08	1135.2	1007.8	1262.8	1138.72	1076.56
Parascaris_univalens	8.59744	10.3373	2.07779	10.0249	17.7101	0	10.3261	6.63782	1.50704	12.611	9.34033	2.59848	6.76635	4.41654	4.50172	6.51988	9.40234	4.27497	9.16878	3.25983	15.0645	13.5095	5.56663	10.6473	8.92591	6	3.02493	73.2009	5.03919	6.90531	3.61029	7.30481	12.0259	7.15018	8.20473	10.3967	13.0034	11.9313	3.35554	4.94238	9.38862
Nicotiana_otophora	230.22	567.609	389.585	420.043	472.965	363.272	417.346	640.55	254.69	222.493	605.787	154.61	292.645	251.743	492.938	289.772	287.712	366.579	380.921	265.133	399.711	455.571	405.668	269.46	250.818	202	521.297	724.304	351.736	436.761	220.227	277.583	338.229	355.722	258.449	557.64	543.543	287.146	749.404	444.814	280.616
Preussia_sp._BSL10	34.3898	0.93975	11.4278	1.00249	7.29241	3.28258	0.860507	3.31891	9.04225	4.50391	5.33733	3.89772	1.26869	37.5406	3.00114	0	9.40234	1.06874	2.50058	1.08661	2.0086	0.750528	6.26246	171.996	2.67777	2	3.02493	0.96317	2.01568	8.63164	2.88823	4.56551	0	0.893773	1.02559	2.83546	2.60069	27.8397	4.47406	5.93086	1.04318
Solanum_americanum	72.6006	22.554	24.9334	52.1295	34.3785	33.92	36.1413	41.4864	36.9225	34.2297	34.6927	63.6627	103.187	13.2496	33.7629	26.8039	50.7727	27.7873	11.6694	9.7795	41.1763	15.7611	7.65412	32.7611	15.174	26	21.1745	20.2266	87.682	31.0739	48.3778	37.4372	85.6846	41.1136	109.738	19.8482	19.5051	47.7251	16.7777	13.8387	53.2022
3300017991_____Ga0180434_10000080	2.86581	28.1925	5.19447	24.0598	9.37596	3.28258	7.74457	6.63782	0	7.20626	10.6747	1.29924	0.845794	0	2.25086	2.89772	0	5.34372	11.6694	2.17322	2.0086	8.25581	9.7416	1.63805	19.637	0	8.06648	29.8583	2.01568	22.4423	5.0544	7.30481	0	1.78755	5.12796	21.7385	9.1024	2.38626	13.4222	8.89628	2.08636
Girardia_tigrina	182.457	345.828	233.751	109.271	348.994	170.694	226.313	343.507	143.922	123.407	366.942	124.727	146.322	164.516	271.604	203.565	193.688	73.7433	61.6809	182.551	94.4041	308.467	219.882	191.652	147.277	159	345.851	1409.12	75.5879	357.35	119.861	194.491	260.06	204.674	136.404	132.321	323.785	341.235	365.754	539.708	339.034
Acinonyx_jubatus	729.827	775.294	710.603	823.044	821.959	714.508	878.578	831.388	658.577	711.618	777.916	691.195	681.71	743.082	698.516	657.783	697.654	635.902	615.142	655.226	736.151	820.327	757.758	689.62	760.487	752	759.258	941.98	664.166	792.385	675.123	658.346	683.973	699.824	604.073	773.135	894.636	771.556	800.856	839.216	685.37
Saksenaea_oblongispora	3.82109	7.518	3.11668	5.01245	8.33418	6.56516	12.0471	6.63782	2.26056	6.30548	17.3463	0	2.53738	1.10413	6.75257	5.79545	3.76094	9.61869	2.50058	0	1.0043	8.25581	6.95829	10.6473	7.14072	1	4.03324	32.7478	1.00784	8.63164	4.33234	4.56551	1.50324	2.68132	2.05118	4.72576	7.80206	126.472	6.71108	8.89628	2.08636
Medicago_truncatula	108.901	165.396	25.9723	90.2241	111.47	123.644	158.333	182.54	57.2676	162.141	134.768	76.6551	69.778	23.1868	68.276	132.571	67.6969	28.8561	20.0046	24.992	120.516	202.643	173.261	217.861	41.9518	20	37.3075	201.302	55.4311	93.2217	113.363	126.921	97.7105	109.934	111.789	121.925	218.458	40.5664	145.407	37.5621	103.275
Macrocystidia_cucumis	5.73163	6.57825	2.07779	23.0573	8.33418	12.0361	4.30254	21.5729	3.01408	15.3133	12.009	10.3939	4.65187	58.5191	104.29	12.3153	11.2828	3.20623	0	0	32.1376	9.00634	4.8708	73.7124	10.7111	5	4.03324	12.5212	4.03135	6.90531	6.49851	10.9572	3.00648	16.0879	22.563	2.83546	7.80206	34.203	11.1851	44.4814	5.2159
Corynebacterium_kefirresidentii	8.59744	12.2168	1.03889	2.00498	11.4595	5.47097	9.46558	18.254	4.52112	1.80156	4.003	2.59848	1.69159	0	8.25315	10.8665	7.52187	10.6874	6.66821	5.43305	3.0129	6.75476	7.65412	7.37124	28.5629	2	14.1163	5.77902	4.03135	1.72633	3.61029	3.65241	4.50971	8.93773	0	2.83546	6.50171	4.77251	1.11851	75.1242	3.12954
Vitrella_brassicaformis	13.3738	17.8553	15.5834	16.0398	16.6684	9.84774	12.9076	8.29728	12.0563	33.3289	16.012	3.89772	8.03504	9.93721	30.0114	21.7329	28.207	6.41246	13.3364	15.2125	6.02579	29.2706	35.4873	18.8376	9.8185	11	4.03324	20.2266	7.05487	22.4423	15.1632	13.6965	4.50971	8.93773	15.3839	22.6837	58.5154	14.3175	16.7777	8.89628	10.4318
Egretta_garzetta	103.169	186.071	102.85	138.344	167.725	131.303	146.286	205.773	72.338	145.927	229.505	94.8445	96.4205	73.977	131.3	94.9004	82.7406	95.1182	140.032	102.141	121.52	252.178	192.745	170.357	235.644	104	132.089	247.535	101.792	139.833	144.411	143.357	114.246	90.2711	111.789	174.853	288.676	103.404	253.903	175.949	94.9294
Megachile_rotundata	17.1949	23.4938	10.3889	17.0423	28.1279	8.75355	12.9076	24.8918	11.3028	19.8172	45.3673	9.09468	16.0701	13.2496	15.756	19.5596	20.6852	13.8937	15.837	15.2125	18.0774	41.2791	35.4873	23.7518	16.9592	13	24.1995	226.345	20.1568	22.4423	13.7191	16.4358	43.5939	22.3443	11.2815	18.903	41.611	27.0442	22.3703	31.6312	16.6909
Antrostomus_carolinensis	117.498	201.107	140.251	110.274	190.644	207.897	136.821	164.286	108.507	140.522	180.135	111.735	104.033	142.433	125.298	184.73	116.589	121.837	109.192	144.519	158.679	252.928	253.978	136.777	174.055	157	177.463	255.24	69.5409	158.822	99.6439	144.27	145.814	105.465	68.7146	128.541	252.266	124.881	199.095	206.591	147.088
Anopheles_christyi	20.0607	44.1683	18.7001	45.112	40.6291	15.3187	24.9547	26.5513	17.331	39.6344	21.3493	15.5909	19.4533	22.0827	18.0069	15.213	31.968	17.0999	10.8358	14.1259	22.0946	39.778	35.4873	29.4849	25.8851	13	20.1662	20.2266	20.1568	22.4423	23.8279	31.9586	34.5745	17.8755	15.3839	25.5191	54.6144	30.2259	22.3703	20.758	20.8636
Anoplophora_glabripennis	77.377	73.3005	38.4391	62.1544	147.932	37.2026	63.6775	86.2917	36.169	61.2532	93.4033	36.3787	57.9369	36.4364	60.7732	57.23	86.5016	59.8496	49.178	35.8582	65.2794	99.8203	98.1119	78.6265	64.2665	41	65.5402	154.107	63.4938	63.8741	37.547	73.0481	81.1748	44.6886	59.4843	80.338	120.932	52.4976	111.851	82.0435	55.2886
Ferrisia_virgata	39.1661	51.6863	40.5168	35.0871	56.2557	52.5213	28.3967	63.0593	60.2817	71.1618	49.3703	29.8825	42.2897	34.2282	21.008	44.9147	50.7727	39.5435	26.6728	30.4251	26.1118	51.7865	46.6205	27.0279	62.4813	27	41.3407	71.2746	39.3057	41.4319	41.8793	25.5668	66.1425	23.2381	42.0493	31.19	71.5189	38.9755	31.3184	56.3431	26.0795
Hypochthonius_rufulus	18.1502	31.0118	15.5834	20.0498	26.0443	22.9781	25.8152	33.1891	9.79577	14.4125	38.6957	15.5909	16.493	13.2496	21.008	18.1108	28.207	16.0312	10.8358	20.6456	18.0774	35.2748	263.023	25.3898	23.2074	14	26.2161	62.606	12.0941	31.0739	6.49851	23.7406	45.0971	18.7692	15.3839	20.7934	50.7134	24.658	31.3184	24.7119	34.425
Genlisea_aurea	3.82109	6.57825	11.4278	3.00747	15.6266	8.75355	5.16304	8.29728	3.7676	9.00782	2.66867	6.4962	12.264	24.291	12.0046	11.5909	3.76094	22.4436	5.00115	5.43305	6.02579	3.75264	4.17497	4.09513	6.24813	15	11.0914	5.77902	10.0784	5.17898	3.61029	4.56551	13.5291	0.893773	8.20473	8.50637	10.4027	11.1359	5.59257	5.93086	3.12954
Dirofilaria_immitis	9.55271	20.6745	8.31115	13.0324	11.4595	6.56516	10.3261	6.63782	5.27465	8.10704	24.018	7.79544	7.18925	7.72894	7.50286	8.69317	9.40234	9.61869	5.83468	4.34644	4.0172	27.7695	221.274	13.9234	14.2814	3	14.1163	26.9688	6.04703	5.17898	7.94263	7.30481	19.5421	9.8315	7.17914	8.50637	16.9045	10.3404	11.1851	19.7695	7.30226
Drosophila_rhopaloa	80.2428	29.1323	12.4667	17.0423	26.0443	12.0361	17.2101	16.5946	8.28873	23.4203	20.015	14.2916	14.3785	7.72894	7.50286	9.4176	18.8047	13.8937	5.83468	15.2125	15.0645	40.5285	38.9664	22.9327	10.7111	17	20.1662	49.1217	22.1724	17.2633	13.7191	15.5227	28.5615	8.04396	10.2559	17.9579	55.9147	25.4534	15.6592	10.8732	13.5613
Manis_javanica	4014.05	4684.66	3544.7	3845.55	4368.15	4259.69	3716.53	4193.45	3344.88	3655.37	3793.51	3902.92	4118.17	4186.88	4112.32	4150.26	4082.5	4063.36	3596.66	3839	3843.45	4642.02	3497.24	3593.07	4428.14	3906	3849.73	5187.63	3947.7	4250.22	3231.93	3283.51	3756.59	3382.93	3582.39	3611.43	4401.66	4331.06	4498.66	4538.09	4115.35
Ectocarpus_siliculosus	9.55271	28.1925	19.739	16.0398	32.295	17.5071	20.6522	28.2108	17.331	27.9243	26.6867	10.3939	14.3785	19.8744	17.2566	8.69317	18.8047	14.9624	15.837	17.3858	7.03009	53.2875	32.0081	21.2947	27.6703	11	17.1413	36.6005	17.1333	36.2529	16.6073	24.6537	15.0324	16.9817	15.3839	19.8482	27.3072	15.113	35.7924	9.88476	9.38862
Malassezia_furfur	6.6869	0	12.4667	17.0423	7.29241	3.28258	0.860507	8.29728	2.26056	11.7102	1.33433	10.3939	18.1846	16.562	9.00343	10.142	9.40234	13.8937	4.16763	9.7795	0	0	2.08749	4.91416	16.0666	10	3.02493	2.88951	24.1881	6.90531	0.722057	1.8262	10.5227	3.57509	13.3327	0	3.90103	8.74961	3.35554	10.8732	3.12954
Heliconius_ethilla	245.505	439.803	142.328	386.961	186.477	294.338	330.435	333.551	183.859	93.6814	408.306	106.538	206.797	210.89	351.884	217.329	188.047	201.993	185.876	187.984	309.324	255.18	600.5	180.186	255.281	188	186.537	749.346	232.811	207.159	121.306	148.836	144.311	286.007	225.63	206.043	317.284	286.351	559.257	548.604	260.795
Serratia_marcescens	459.486	1387.07	446.724	1100.73	896.967	1274.74	1243.43	81.3134	480.746	621.54	1098.16	611.942	813.654	559.796	1158.44	796.874	492.683	426.429	875.202	395.526	763.267	902.135	706.962	387.399	629.276	543	813.707	1802.09	819.373	759.584	429.624	511.337	544.172	814.227	1102.51	1421.51	1094.89	379.415	1739.29	1040.87	690.585
Vigna_angularis	67.8243	127.806	60.2558	105.261	93.7596	50.3329	104.982	71.3566	55.7605	69.3602	80.06	46.7726	66.8177	37.5406	93.7858	47.088	56.4141	59.8496	70.8497	45.6376	79.3396	132.844	94.6327	111.388	114.252	53	99.8227	183.002	78.6114	79.4111	84.4807	61.1778	97.7105	76.8645	41.0237	114.363	126.133	69.2014	118.562	79.0781	56.3317
Heliconius_pachinus	13.3738	20.6745	8.31115	25.0622	43.7545	20.7897	15.4891	34.8486	9.04225	9.00782	44.033	11.6932	16.9159	14.3537	29.2612	23.1818	28.207	16.0312	18.3376	16.2992	18.0774	27.019	27.1373	37.6752	31.2407	12	17.1413	41.4163	11.0862	29.3476	10.1088	20.0882	25.555	18.7692	9.23032	14.1773	44.2117	25.4534	31.3184	21.7465	13.5613
Camelus_dromedarius	3937.63	4506.1	3600.8	5845.52	4277.52	3653.51	4657.07	4374.33	4667.31	3401.35	5185.22	3650.86	2675.67	3484.65	4011.78	3167.21	2948.57	3543.95	4937.81	2831.71	4579.6	4428.12	5057.98	6162.35	8868.78	4478	3703.52	3598.4	3928.55	4600.66	5387.99	4371.93	3053.08	3940.64	3221.38	4946.93	4159.8	3762.33	4503.14	4273.18	4544.09
3300017986_____Ga0181569_10000349	11.4633	11.277	54.0225	8.01992	55.214	4.37677	5.16304	18.254	2.26056	211.684	5.33733	27.284	2.96028	1.10413	3.00114	5.79545	9.40234	4.27497	5.83468	3.25983	7.03009	141.85	114.812	8.19026	26.7777	0	1.00831	2.88951	1.00784	13.8106	5.77646	15.5227	4.50971	1.78755	1.02559	6.61607	332.888	19.0901	17.8962	5.93086	18.7772
Populus_trichocarpa	24.8371	32.8913	14.5445	29.0722	36.4621	12.0361	12.9076	48.1242	14.3169	41.436	26.6867	15.5909	22.4135	12.1455	18.7572	36.946	39.4898	22.4436	20.8381	13.0393	24.1032	59.2917	47.3164	39.3133	22.3148	21	24.1995	52.0112	9.07055	36.2529	15.8853	26.4799	43.5939	17.8755	29.7422	25.5191	88.4233	20.6809	23.4888	26.6889	19.8204
Mayetiola_destructor	17.1949	25.3733	9.35004	13.0324	33.3367	10.9419	15.4891	28.2108	5.27465	14.4125	40.03	5.19696	14.3785	7.72894	15.756	18.8352	20.6852	18.1686	10.0023	6.51966	42.1806	32.2727	44.533	27.8469	10.7111	11	16.133	40.4531	12.0941	29.3476	10.1088	15.5227	28.5615	12.5128	9.23032	14.1773	40.3106	23.8626	27.9628	33.6082	17.7341
Eleusine_coracana	109.856	83.6378	81.0337	89.2216	148.974	121.455	84.3297	124.459	58.7746	132.415	134.768	89.6475	131.098	59.6233	257.348	76.0652	197.449	66.2621	83.3526	73.8895	93.3998	148.605	125.945	171.996	101.755	88	81.6732	136.77	92.7211	120.843	70.7616	75.7874	157.84	94.7399	92.3032	97.3507	157.341	136.812	87.2441	96.8706	104.318
Oryzias_latipes	72.6006	109.011	64.4114	90.2241	137.514	68.9342	71.4221	91.2701	41.4436	123.407	108.081	71.4582	98.1121	45.2695	76.5292	79.6874	92.143	86.5682	60.8474	68.4565	71.3052	173.372	146.82	109.75	77.6554	78	88.7313	429.574	76.5957	139.833	39.7131	86.7447	153.33	67.9267	92.3032	86.0089	201.553	92.2686	77.1775	101.813	108.491
Sphaeromyxa_zaharoni	8.59744	10.3373	5.19447	7.01743	9.37596	4.37677	9.46558	9.95674	3.01408	8.10704	12.009	5.19696	8.45794	2.20827	9.75372	11.5909	9.40234	6.41246	5.00115	5.43305	7.03009	8.25581	8.34995	6.55221	4.46295	5	15.1247	11.558	7.05487	13.8106	4.33234	7.30481	24.0518	6.25641	6.15355	8.50637	27.3072	7.15877	5.59257	6.91933	9.38862
Nicrophorus_vespilloides	33.4345	31.9515	25.9723	24.0598	35.4203	20.7897	23.2337	38.1675	15.0704	20.718	42.6987	20.7878	26.6425	11.0413	22.5086	21.7329	45.1312	37.406	17.504	16.2992	16.0688	51.7865	51.4913	43.4084	21.4222	25	25.2078	111.728	26.2038	32.8002	12.997	25.5668	51.1101	23.2381	19.4862	27.4094	72.8192	31.0213	34.6739	28.6658	19.8204
Staphylococcus_epidermidis	10.508	15.036	7.27225	11.0274	23.9608	17.5071	9.46558	23.2324	6.02817	12.611	10.6747	9.09468	8.88084	7.72894	9.00343	20.2841	13.1633	13.8937	6.66821	8.69289	4.0172	15.0106	11.8291	24.5708	73.1924	10	16.133	10.5949	23.1803	25.8949	19.4955	10.9572	7.51619	16.0879	12.3071	18.903	26.0069	12.7267	19.0147	182.868	5.2159
Tepidiphilus_thermophilus	0.955271	1.8795	0	1.00249	4.16709	0	1.72101	4.97837	0	6.30548	2.66867	1.29924	2.11449	1.10413	31.512	2.17329	3.76094	1.06874	4.16763	1.08661	0	3.00211	0	2.45708	192.8	0	3.02493	0.96317	2.01568	3.45266	0.722057	0	7.51619	0	0	1.8903	7.80206	23.0671	0	6.91933	1.04318
Shigella_flexneri	5.73163	15.036	2.07779	9.02241	20.8355	13.1303	9.46558	9.95674	5.27465	12.611	12.009	3.89772	10.1495	1.10413	12.7549	7.96874	16.9242	0	0	0	9.03869	12.0085	4.17497	10.6473	2.67777	2	0	20.2266	8.06271	10.358	3.61029	4.56551	1.50324	7.15018	8.20473	7.56122	9.1024	9.54503	19.0147	22.7349	9.38862
Chinchilla_lanigera	5284.56	3538.16	4906.69	4786.89	3800.39	3470.78	3810.33	3776.92	4292.81	4553.45	3921.61	4904.63	5449.03	5275.55	4065.8	3704.01	5276.59	4509.03	3990.92	4883.23	4510.31	3529.73	3254.39	4448.13	4231.77	5447	3961.65	3487.64	4895.07	4894.14	4514.3	4036.82	5590.54	4590.42	4860.28	4091.56	3728.08	4489.34	3217.96	3096.9	4685.97
Anguilla_rostrata	67.8243	109.951	79.9948	64.1593	134.389	113.796	83.4692	119.481	52.7465	100.888	128.096	68.8597	51.5934	57.415	91.5349	81.1362	71.4578	81.2245	87.5202	77.1494	76.3267	132.844	136.382	81.9026	83.0109	65	90.7479	132.917	67.5252	122.569	53.4322	76.7005	111.24	54.5201	76.9194	113.418	187.249	120.904	133.103	173.972	88.6703
Methylobacterium_sp._GXS13	14.3291	6.57825	6.23336	1.00249	31.2532	39.391	12.0471	28.2108	24.8662	36.9321	21.3493	15.5909	10.1495	9.93721	10.504	37.6704	15.0437	22.4436	15.0035	10.8661	3.0129	3.75264	2.78332	6.55221	28.5629	12	9.07479	1.92634	17.1333	22.4423	8.66468	4.56551	22.5486	2.68132	23.5886	0.945152	74.1195	9.54503	34.6739	21.7465	5.2159
Pongo_abelii	177665	151824	193104	198499	165619	150315	220696	156792	145986	207595	158232	160573	156765	151414	150318	148770	183972	227384	225269	150705	154502	165022	150444	176720	191495	199016	216621	138127	203218	157849	207086	155695	160929	146925	162639	192306	153646	147852	155334	139527	149422
Eufriesea_mexicana	124.185	230.239	131.939	125.311	101.052	261.512	243.524	195.816	95.6971	124.308	258.861	113.034	103.187	114.83	198.826	184.73	112.828	91.912	43.3433	86.9289	158.679	267.939	245.628	118.759	255.281	138	201.662	435.353	98.7682	167.454	105.42	139.705	136.795	159.985	126.148	90.7346	306.881	112.154	284.103	327.186	143.959
Canis_lupus	1693.7	1426.54	1788.97	1502.73	1679.34	1615.03	1454.26	1478.58	1439.22	1679.06	1558.5	1976.14	1761.79	1686.01	1574.85	1590.85	1564.55	1638.38	1577.03	1635.35	1559.68	1535.58	1254.58	1582.36	1571.85	1761	1487.26	1339.77	1712.32	1900.69	1464.33	1274.69	1701.67	1477.41	1753.76	1557.61	1589.02	1651.29	1470.85	1599.35	1533.48
Calidris_pugnax	125.141	210.504	120.512	152.378	180.227	156.47	141.123	170.924	86.6549	164.843	209.49	116.932	154.357	72.8729	173.316	131.846	109.067	85.4995	99.1896	81.4958	119.512	249.926	593.542	130.225	141.029	86	130.072	301.472	106.831	158.822	94.5895	109.572	154.834	121.553	156.916	145.553	253.567	121.699	237.125	152.225	134.57
Alligator_mississippiensis	128.962	105.252	127.784	97.2415	159.391	77.6877	87.7717	106.205	85.9014	201.775	118.756	116.932	112.914	96.0597	102.039	80.4118	125.991	137.868	98.356	113.008	104.447	200.391	187.178	107.292	83.9035	89	102.848	124.249	143.113	167.454	81.5924	104.094	171.369	115.297	93.3288	80.338	248.365	124.881	82.77	110.709	125.182
Rhincodon_typus	955.271	1598.52	969.288	401.998	1603.29	1112.79	1113.5	1420.49	638.232	692.702	1538.49	714.582	587.827	605.066	1276.99	1035.94	801.08	722.471	689.326	636.754	1055.52	1450.77	1235.79	746.133	643.558	653	1315.85	2438.75	706.495	1631.38	503.996	966.062	1053.77	1031.41	740.477	1272.18	1572.11	1640.15	1639.74	2531.49	1489.66
Oithona_nana	311.418	775.294	411.402	326.812	571.933	217.744	566.214	635.572	178.584	100.888	457.676	131.223	315.058	329.032	698.516	254.275	285.831	344.135	343.413	355.322	434.861	573.404	259.544	248.165	329.366	311	710.859	1013.25	254.983	502.361	122.75	167.098	216.466	410.242	332.292	526.45	550.045	666.561	623.012	1080.4	407.884
Caenorhabditis_brenneri	20.0607	45.108	11.4278	33.0822	23.9608	16.4129	22.3732	21.5729	18.0845	30.6266	33.3583	10.3939	16.0701	17.6662	14.2554	16.6619	7.52187	12.8249	8.33526	14.1259	23.0989	45.0317	24.354	22.9327	28.5629	14	12.0997	36.6005	17.1333	18.9896	21.6617	20.0882	34.5745	18.7692	18.4606	31.19	35.1093	16.7038	22.3703	30.6428	14.6045
Pseudomonas_stutzeri	2.86581	2.81925	2.07779	4.00996	7.29241	16.4129	7.74457	13.2756	2.26056	14.4125	16.012	6.4962	2.96028	3.3124	9.00343	11.5909	11.2828	7.48121	2.50058	7.60627	1.0043	3.00211	7.65412	11.4664	15.174	3	5.04155	10.5949	6.04703	8.63164	5.77646	4.56551	6.01295	4.46886	11.2815	2.83546	11.7031	19.0901	12.3037	21.7465	0
Streptococcus_dysgalactiae	275.118	670.982	416.596	318.792	670.902	488.01	467.255	544.302	308.943	156.736	495.038	165.003	213.563	399.697	602.48	489.715	250.102	461.697	610.974	484.628	444.904	631.194	3168.11	366.105	527.521	430	673.551	952.575	230.795	512.719	311.207	446.507	175.879	348.571	202.042	613.404	579.953	622.813	634.197	863.928	417.272
Cathartes_aura	43.9425	596.742	216.09	365.909	81.2583	500.046	399.275	645.528	238.866	220.692	651.155	224.768	236.399	125.871	482.434	490.44	274.548	289.63	309.238	231.448	318.363	496.85	663.821	234.242	199.94	19	351.9	748.383	250.952	407.413	215.895	336.935	189.408	256.513	238.963	542.517	628.066	489.978	614.064	724.553	296.263
Heliconius_heurippa	18.1502	17.8553	11.4278	33.0822	26.0443	9.84774	20.6522	36.508	9.79577	10.8094	21.3493	10.3939	15.6472	4.41654	11.2543	10.8665	13.1633	10.6874	26.6728	9.7795	12.0516	30.0211	81.412	30.304	17.8518	17	25.2078	45.269	7.05487	20.7159	10.1088	20.0882	30.0648	9.8315	11.2815	71.8316	28.6075	19.0901	20.1333	28.6658	26.0795
Centruroides_sculpturatus	75.4664	126.866	62.3336	112.279	136.472	80.9703	112.726	165.946	53.5	66.6579	152.114	37.6779	77.8131	56.3109	90.7846	78.9629	105.306	65.1934	76.6844	61.9368	99.4256	140.349	119.683	115.483	104.433	71	122.006	234.05	84.6584	132.927	49.8219	87.6578	141.304	71.5018	64.6123	127.596	214.557	118.517	114.088	157.168	106.404
Conringia_planisiliqua	10.508	9.3975	4.15557	9.02241	18.7519	8.75355	12.9076	11.6162	5.27465	7.20626	21.3493	10.3939	16.0701	5.52067	12.7549	5.79545	15.0437	6.41246	7.50173	4.34644	8.03439	19.5137	13.2207	16.3805	10.7111	5	7.05817	23.1161	6.04703	8.63164	9.38674	6.39171	21.0453	11.619	11.2815	16.0676	23.4062	9.54503	11.1851	15.8156	8.34544
Penicillium_decumbens	21.016	56.385	0	21.0523	77.0912	82.0645	46.4674	119.481	15.0704	65.7571	89.4003	50.6703	29.6028	1.10413	36.0137	65.1988	28.207	2.13749	8.33526	5.43305	42.1806	63.0444	34.0956	69.6172	4.46295	3	1.00831	56.827	19.1489	65.6005	33.9367	39.2634	34.5745	29.4945	48.2028	51.9834	93.6247	3.97709	71.5849	4.94238	16.6909
Kryptolebias_marmoratus	62.0926	88.3365	64.4114	60.1494	104.177	63.4632	68.8406	122.8	47.4718	111.697	100.075	53.2688	58.3598	39.7488	59.2726	65.1988	86.5016	61.9871	50.8451	48.8975	50.2149	174.123	149.603	77.8075	85.6887	52	75.6233	125.212	48.3763	100.127	53.4322	65.7433	120.259	44.6886	55.3819	86.954	208.055	97.8365	96.1922	97.8591	68.8499
Volvox_carteri	34.3898	8.45775	30.1279	8.01992	34.3785	22.9781	11.1866	19.9135	44.4577	49.543	30.6897	23.3863	43.9813	43.0612	39.0149	18.1108	35.7289	23.5124	8.33526	39.118	8.03439	28.5201	33.3998	16.3805	7.14072	53	30.2493	10.5949	33.2587	48.3372	12.997	6.39171	46.6004	7.15018	29.7422	10.3967	50.7134	39.7709	22.3703	14.8271	11.475
Mesorhizobium_sp._L103C565B0	7.64217	16.9155	10.3889	6.01494	11.4595	1.09419	11.1866	3.31891	9.04225	20.718	6.67167	5.19696	13.1098	1.10413	15.0057	3.62215	5.64141	1.06874	6.66821	5.43305	20.086	19.5137	13.9166	6.55221	9.8185	2	9.07479	24.0792	6.04703	5.17898	13.7191	5.47861	19.5421	1.78755	31.7933	11.3418	16.9045	1.59084	6.71108	2.96543	3.12954
Umbilicaria_pustulata	7.64217	3.759	9.35004	12.0299	8.33418	3.28258	6.02355	4.97837	4.52112	9.00782	14.6777	3.89772	5.49766	707.75	240.842	2.17329	5.64141	3.20623	20.0046	3.25983	84.3611	13.5095	4.8708	90.9119	12.4963	4	2.01662	25.0424	11.0862	5.17898	2.16617	4.56551	7.51619	8.04396	5.12796	2.83546	7.80206	55.6793	6.71108	26.6889	1.04318
Schmidtea_mediterranea	64.9585	75.18	58.178	69.1718	103.136	48.1445	55.0725	89.6106	36.9225	34.2297	117.421	31.1818	49.479	56.3109	54.7709	54.3323	82.7406	60.9184	35.0081	39.118	47.202	103.573	76.5412	81.0836	55.3406	44	81.6732	284.135	67.5252	86.3164	36.8249	73.9612	112.743	58.989	37.9469	85.0637	136.536	81.1327	63.7553	92.9167	79.2817
Nannopterum_auritus	24.8371	50.7465	29.089	33.0822	55.214	55.8039	43.0254	66.3782	27.8803	33.3289	41.3643	16.8901	26.6425	16.562	28.5109	107.94	9.40234	28.8561	15.0035	32.5983	29.1247	72.8013	611.634	45.0464	199.94	27	48.3989	55.8638	51.3998	32.8002	31.0485	42.0027	34.5745	27.707	8.20473	25.5191	61.1161	45.3389	65.9923	125.536	26.0795
Taenia_multiceps	6.6869	9.3975	7.27225	5.01245	9.37596	7.65935	5.16304	13.2756	7.53521	7.20626	8.006	1.29924	7.18925	6.62481	6.75257	2.17329	5.64141	4.27497	3.3341	5.43305	6.02579	8.25581	6.26246	7.37124	5.35554	2	7.05817	48.1585	1.00784	5.17898	3.61029	4.56551	12.0259	6.25641	2.05118	4.72576	3.90103	7.95419	6.71108	5.93086	6.25908
Balaenoptera_acutorostrata	1094.74	776.234	1117.85	725.803	965.724	851.282	735.734	877.852	932.859	981.853	760.57	1186.21	1131.67	1119.59	964.118	945.382	1201.62	1064.47	905.209	1125.73	807.456	691.237	744.537	718.286	870.276	1253	954.87	658.808	1016.91	1015.08	877.299	735.047	1094.36	866.96	1133.28	714.535	853.025	1094.5	629.723	722.576	917.999
Limulus_polyphemus	241.684	395.635	190.117	330.822	403.166	219.933	333.016	384.994	172.556	252.219	453.673	214.375	243.589	139.121	294.112	230.369	221.895	166.724	206.714	172.771	280.199	468.33	396.622	434.903	312.407	177	258.127	1088.38	249.944	314.192	259.218	263.886	429.926	273.494	247.168	397.909	526.639	289.532	404.902	352.886	305.652
Lawsonella_clevelandensis	64.9585	107.132	27.0112	64.1593	1608.5	892.862	134.239	219.048	63.2957	158.538	104.078	87.0491	37.2149	14.3537	62.2737	1419.88	71.4578	461.697	20.0046	15.2125	38.1634	328.731	45.2289	281.745	856.887	28	48.3989	126.175	1556.1	34.5266	47.6558	25.5668	342.738	30.3883	65.6379	60.4898	581.253	81.1327	117.444	301.485	128.311
Corynebacterium_urinapleomorphum	15.2843	16.9155	10.3889	11.0274	14.5848	10.9419	5.16304	8.29728	8.28873	6.30548	13.3433	9.09468	16.493	11.0413	13.5051	10.142	5.64141	10.6874	7.50173	13.0393	8.03439	21.0148	6.95829	11.4664	12.4963	6	8.06648	12.5212	19.1489	10.358	6.49851	8.21791	15.0324	18.7692	8.20473	10.3967	23.4062	10.3404	23.4888	22.7349	8.34544
Solanum_pimpinellifolium	2123.57	5321.81	2566.07	2914.24	4338.98	3545.19	3977.26	4019.2	2023.96	1436.75	3897.59	1404.48	2095.88	2188.39	3981.02	3400.48	1530.7	2079.78	3785.04	2718.7	3188.65	4216.47	3875.07	2629.07	3095.5	2162	3899.14	6808.65	1688.13	3254.13	2048.48	2621.51	1486.7	2686.68	2338.35	4844.85	4060.97	3287.47	5359.92	4727.88	2830.15
Stramenopiles_sp._TOSAG23-2	41.0767	109.951	57.1391	61.1519	71.8823	52.5213	55.933	68.0377	42.1972	32.4282	72.054	38.9772	54.9766	45.2695	88.5337	52.8834	33.8484	54.5059	66.6821	60.8502	58.2493	42.7801	48.708	22.9327	34.811	39	71.59	161.813	53.4154	56.9688	33.2146	43.8289	55.6198	64.3516	57.4331	63.3252	58.5154	58.861	100.666	59.3086	54.2454
Methylobacterium_sp._Leaf456	11.4633	5.6385	11.4278	0	13.543	22.9781	8.60507	29.8702	13.5634	19.8172	22.6837	14.2916	10.5724	3.3124	7.50286	25.3551	1.88047	8.54995	9.16878	9.7795	2.0086	3.00211	4.17497	6.55221	29.4555	11	5.04155	3.85268	4.03135	17.2633	5.77646	2.7393	6.01295	2.68132	15.3839	2.83546	27.3072	7.95419	21.2518	14.8271	0
3300017952_____Ga0181583_10003850	4.77636	18.795	3.11668	11.0274	11.4595	3.28258	9.46558	16.5946	2.26056	22.5196	12.009	5.19696	5.49766	1.10413	7.50286	5.79545	3.76094	2.13749	5.00115	4.34644	5.02149	39.778	27.1373	11.4664	17.8518	0	4.03324	16.3739	4.03135	1.72633	12.997	10.9572	4.50971	5.36264	8.20473	11.3418	23.4062	3.18168	27.9628	16.8041	7.30226
Crocosphaera_watsonii	2.86581	1.8795	3.11668	14.0349	19.7937	7.65935	6.02355	4.97837	0.753521	3.60313	4.003	5.19696	2.11449	0	2.25086	80.4118	0	25.6498	0	0	1.0043	3.00211	2.08749	4.09513	191.014	0	0	6.74219	23.1803	0	1.44411	0	6.01295	0.893773	0	3.78061	2.60069	2.38626	1.11851	2.96543	0
Prunus_avium	9.55271	12.2168	6.23336	9.02241	10.4177	5.47097	9.46558	9.95674	6.02817	16.2141	16.012	3.89772	7.61215	4.41654	10.504	10.8665	13.1633	2.13749	8.33526	2.17322	2.0086	20.2643	25.0498	18.8376	4.46295	8	10.0831	18.3002	4.03135	12.0843	5.77646	15.5227	15.0324	3.57509	10.2559	9.45152	35.1093	8.74961	12.3037	15.8156	13.5613
Calothrix_sp._NIES-2100	7.64217	35.7105	30.1279	17.0423	21.8772	36.1084	24.0942	19.9135	20.3451	32.4282	18.6807	19.4886	20.2991	5.52067	23.2589	31.1505	11.2828	7.48121	19.1711	10.8661	22.0946	47.2833	29.9206	51.5987	63.3739	7	37.3075	45.269	18.1411	22.4423	45.4896	14.6096	21.0453	22.3443	41.0237	31.19	41.611	10.3404	33.5554	22.7349	19.8204
Cotesia_vestalis	26.7476	34.7708	34.2835	32.0797	69.7988	12.0361	26.6757	33.1891	16.5775	137.82	25.3523	20.7878	31.2944	4.41654	17.2566	23.9062	20.6852	16.0312	16.6705	10.8661	14.0602	395.528	161.432	46.6845	30.3481	14	18.1496	44.3058	13.1019	50.0635	12.275	40.1765	24.0518	9.8315	11.2815	22.6837	390.103	154.311	38.0295	34.5967	46.9431
Bradyrhizobium_sp._NAS96.2	12.4185	14.0963	20.7779	8.01992	30.2114	50.3329	9.46558	82.9728	10.5493	80.1696	70.7197	29.8825	16.0701	14.3537	15.756	59.4033	15.0437	23.5124	30.8405	35.8582	6.02579	17.2622	9.7416	14.7425	64.2665	20	25.2078	7.70536	18.1411	48.3372	20.9397	6.39171	27.0583	0.893773	41.0237	5.67091	63.7168	42.9526	49.2146	42.5045	2.08636
Subanguina_moxae	8.59744	14.0963	10.3889	10.0249	15.6266	5.47097	9.46558	6.63782	9.79577	10.8094	12.009	12.9924	10.5724	12.1455	9.75372	11.5909	9.40234	8.54995	3.3341	3.25983	12.0516	15.7611	9.04578	10.6473	3.57036	10	11.0914	7.70536	7.05487	13.8106	8.66468	10.9572	12.0259	11.619	9.23032	9.45152	10.4027	9.54503	4.47406	6.91933	11.475
Glossina_fuscipes	49.6741	136.264	44.6724	107.266	130.222	101.76	106.703	109.524	30.1408	92.7806	84.063	58.4658	43.5584	23.1868	84.7823	68.0965	28.207	44.8872	59.1803	29.3385	70.3009	162.114	121.074	135.958	127.64	34	66.5485	143.512	50.3919	62.1478	57.0425	51.1337	55.6198	59.8828	51.2796	104.912	148.239	50.9068	158.829	132.456	53.2022
Fusarium_phaseoli	7.64217	15.9758	6.23336	9.02241	25.0026	15.3187	9.46558	16.5946	9.79577	2.70235	16.012	5.19696	9.30374	4.41654	27.7606	12.3153	13.1633	18.1686	12.5029	5.43305	5.02149	7.50528	8.34995	11.4664	8.92591	16	13.108	11.558	9.07055	17.2633	4.33234	8.21791	9.01943	4.46886	10.2559	7.56122	20.8055	18.2946	19.0147	16.8041	10.4318
Trachymyrmex_septentrionalis	17.1949	26.313	15.5834	17.0423	22.919	9.84774	18.0707	26.5513	9.04225	15.3133	34.6927	11.6932	19.4533	6.62481	9.75372	13.0398	18.8047	9.61869	6.66821	17.3858	16.0688	27.019	29.2248	30.304	18.7444	13	19.1579	65.4955	14.1097	31.0739	11.5529	26.4799	37.5809	15.1941	15.3839	19.8482	36.4096	15.9084	16.7777	19.7695	11.475
Actinomyces_naeslundii	9.55271	9.3975	7.27225	4.00996	17.7101	4.37677	7.74457	11.6162	3.01408	6.30548	8.006	1.29924	2.53738	0	2.25086	9.4176	13.1633	11.7562	4.16763	4.34644	1.0043	36.7759	4.17497	16.3805	15.174	1	12.0997	3.85268	14.1097	8.63164	8.66468	3.65241	7.51619	5.36264	4.10237	1.8903	23.4062	27.0442	7.8296	229.326	7.30226
Puccinia_striiformis	5.73163	18.795	6.23336	6.01494	18.7519	6.56516	4.30254	9.95674	4.52112	3.60313	9.34033	6.4962	6.76635	8.83308	6.00229	6.51988	278.309	8.54995	3.3341	6.51966	5.02149	17.2622	9.7416	33.5801	5.35554	3	6.04986	59.7165	7.05487	8.63164	7.22057	4.56551	6.01295	6.25641	7.17914	14.1773	14.3038	7.15877	12.3037	13.8387	7.30226
Dunaliella_salina	21.016	13.1565	15.5834	27.0672	29.1696	13.1303	21.5127	26.5513	20.3451	41.436	37.3613	24.6856	31.7173	30.9158	16.5063	20.2841	31.968	22.4436	17.504	24.992	10.043	37.5264	55.6663	22.9327	31.2407	27	20.1662	15.4107	29.2273	25.8949	9.38674	15.5227	18.0389	8.04396	14.3583	28.3546	53.3141	29.4305	25.7258	15.8156	14.6045
Physcomitrella_patens	37.2556	64.8428	31.1668	40.0996	77.0912	36.1084	38.7228	59.7404	17.331	56.7493	62.7137	33.7802	63.4346	9.93721	48.7686	28.2528	45.1312	14.9624	25.0058	26.0787	35.1505	81.8076	58.4496	66.3411	43.7369	14	26.2161	84.7589	39.3057	46.6109	19.4955	37.4372	85.6846	37.5385	53.3308	51.9834	114.43	49.316	63.7553	24.7119	44.8568
Sporothrix_globosa	25.7923	20.6745	17.6612	12.0299	26.0443	20.7897	17.2101	19.9135	22.6056	23.4203	17.3463	31.1818	27.4883	19.8744	12.0046	16.6619	26.3266	16.0312	28.3399	10.8661	8.03439	21.0148	18.0916	25.3898	20.5296	16	12.0997	16.3739	22.1724	22.4423	20.2176	27.393	34.5745	19.663	20.5118	5.67091	20.8055	11.9313	21.2518	9.88476	18.7772
Vibrio_vulnificus	5.73163	22.554	6.23336	6.01494	12.5013	20.7897	17.2101	6.63782	13.5634	4.50391	25.3523	1.29924	9.72663	3.3124	18.0069	13.0398	5.64141	16.0312	0	2.17322	10.043	9.75687	11.8291	9.82832	8.03332	10	19.1579	147.365	13.1019	5.17898	16.6073	4.56551	6.01295	7.15018	9.23032	6.61607	13.0034	5.56793	24.6073	8.89628	15.6477
Grus_japonensis	350.585	618.356	460.23	425.056	870.922	566.792	544.701	677.058	275.035	455.796	803.269	368.984	517.203	316.887	796.053	568.678	396.779	386.885	275.897	303.164	462.982	833.086	704.875	469.302	523.058	311	518.272	919.827	504.927	528.256	319.871	398.112	369.797	409.348	404.083	689.961	802.311	648.266	996.596	1003.3	424.574
Calycina_herbarum	1.91054	5.6385	21.8168	0	7.29241	1.09419	5.16304	8.29728	3.01408	92.7806	6.67167	0	2.11449	1.10413	1.50057	4.34658	1.88047	2.13749	0.833526	1.08661	3.0129	57.7907	52.883	11.4664	8.03332	3	2.01662	4.81585	3.02352	3.45266	1.44411	0.913102	1.50324	0.893773	2.05118	1.8903	87.123	11.9313	3.35554	2.96543	2.08636
Trichosporon_asahii	172.904	319.515	223.362	229.57	419.835	231.969	410.462	263.854	249.415	76.5665	314.903	81.8521	89.2313	193.224	255.848	195.596	105.306	230.849	106.691	211.889	166.714	192.886	324.952	140.053	142.814	167	314.593	444.021	155.207	165.727	202.898	223.71	100.717	285.114	106.662	96.4055	263.97	178.174	367.991	357.828	121.009
Poecilia_latipinna	14.3291	31.9515	8.31115	26.0647	22.919	22.9781	18.9312	26.5513	9.79577	24.3211	25.3523	9.09468	13.5327	14.3537	20.2577	21.7329	13.1633	14.9624	14.1699	28.2519	24.1032	50.2854	24.354	24.5708	24.0999	9	20.1662	50.0848	20.1568	27.6212	10.1088	19.1751	28.5615	22.3443	18.4606	30.2449	50.7134	30.2259	27.9628	27.6773	11.475
Parhyale_hawaiensis	202.518	343.009	178.69	257.64	300.031	236.346	255.571	253.897	124.331	233.303	260.195	187.091	195.378	123.663	192.824	205.738	184.286	153.899	160.87	133.653	224.963	382.019	308.948	372.657	244.57	184	198.637	417.053	228.779	207.159	189.901	210.013	229.995	174.286	188.709	332.694	377.099	198.855	266.206	291.6	214.895
Methylobacterium_phyllostachyos	35.345	2.81925	15.5834	2.00498	77.0912	65.6516	21.5127	124.459	65.5563	85.5743	81.3943	38.9772	25.7967	13.2496	27.0103	70.2698	16.9242	27.7873	25.0058	21.7322	3.0129	0.750528	15.3082	11.4664	51.7703	22	21.1745	0.96317	24.1881	53.5162	44.7675	4.56551	37.5809	0.893773	33.8445	1.8903	101.427	22.2717	48.0961	29.6543	7.30226
Zosterops_lateralis	53.4952	63.903	52.9836	64.1593	78.133	51.4271	65.3986	101.227	38.4296	70.261	106.747	31.1818	46.9416	38.6447	57.772	48.5369	94.0234	44.8872	60.0139	41.2912	52.2235	90.8139	243.54	61.427	63.3739	43	50.4155	99.2065	52.4076	65.6005	38.9911	58.4385	81.1748	42.0073	38.9725	67.1058	153.44	57.2702	90.5996	74.1357	49.0295
Linum_usitatissimum	4.77636	15.9758	15.5834	14.0349	22.919	10.9419	15.4891	36.508	9.79577	18.9164	25.3523	15.5909	13.5327	6.62481	18.0069	14.4886	18.8047	10.6874	18.3376	8.69289	9.03869	30.0211	18.0916	22.1137	19.637	8	21.1745	31.7846	10.0784	18.9896	7.94263	21.0013	36.0777	4.46886	12.3071	18.903	28.6075	17.4992	25.7258	20.758	20.8636
Phoenix_dactylifera	19.1054	41.349	29.089	35.0871	39.5874	17.5071	22.3732	44.8053	13.5634	34.2297	52.039	15.5909	20.722	16.562	27.0103	18.1108	30.0875	21.3749	30.0069	15.2125	17.0731	55.5391	37.5748	22.9327	30.3481	12	29.241	58.7534	25.196	37.9792	15.1632	27.393	39.0842	16.0879	21.5374	26.4643	68.9182	27.8397	35.7924	29.6543	18.7772
Puccinia_arachidis	7.64217	4.69875	2.07779	5.01245	7.29241	12.0361	7.74457	6.63782	3.7676	15.3133	13.3433	3.89772	6.34346	11.0413	13.5051	9.4176	9.40234	4.27497	3.3341	3.25983	7.03009	7.50528	63.3204	21.2947	12.4963	2	8.06648	143.512	4.03135	5.17898	8.66468	0.913102	6.01295	2.68132	4.10237	4.72576	23.4062	5.56793	4.47406	5.93086	3.12954
Trichuris_muris	12454.8	28433.1	15300.8	13788.2	16543.4	1.79717e+06	20400	17210.2	8368.6	1.10602e+06	16699.2	964094	10503.9	13869	18293.5	1.30194e+06	8164.99	13598.7	16802.2	14459.5	16668.3	21135.6	13291	13016	13854.8	12100	21743.2	37181.2	10817.1	13541.3	7500.73	9382.12	8001.74	16006.6	11411.8	22368	16963	17832.5	23871.3	25620.3	15094.8
Tyto_alba	108.901	179.492	119.473	112.279	182.31	129.115	134.239	157.648	71.5845	93.6814	230.84	70.1589	73.1612	99.3721	135.051	138.366	103.426	122.906	123.362	96.7083	115.494	183.129	190.657	133.501	118.715	88	174.438	235.977	114.894	143.285	90.2571	114.138	123.266	95.6337	74.8682	168.237	260.069	135.221	191.266	179.903	104.318
Sorghum_bicolor	14.3291	21.6143	35.3224	27.0672	47.9216	22.9781	23.2337	154.329	10.5493	45.0391	56.042	23.3863	31.7173	17.6662	26.26	34.0482	24.4461	20.3061	22.5052	22.8188	27.1161	57.0402	49.4038	44.2274	18.7444	22	31.2576	41.4163	22.1724	39.7055	24.5499	30.1324	42.0907	23.2381	27.691	43.477	58.5154	31.8168	26.8443	32.6197	32.3386
Bactrocera_tryoni	38.2109	41.349	22.8557	50.1245	71.8823	42.6735	37.8623	49.7837	14.3169	42.3368	70.7197	25.9848	28.757	19.8744	34.5132	31.875	41.3703	30.9936	28.3399	24.992	23.0989	75.0528	100.895	35.2181	33.9184	34	42.349	78.0168	40.3135	39.7055	31.0485	50.2206	63.136	25.0256	25.6398	54.8188	66.3175	32.6122	34.6739	43.4929	38.5977
Asclepias_syriaca	13.3738	12.2168	6.23336	7.01743	19.7937	7.65935	11.1866	11.6162	2.26056	17.1149	29.3553	6.4962	13.5327	9.93721	12.0046	13.0398	15.0437	9.61869	7.50173	8.69289	11.0473	25.518	29.2248	17.1996	14.2814	4	11.0914	36.6005	11.0862	13.8106	3.61029	9.13102	18.0389	18.7692	11.2815	8.50637	27.3072	19.0901	7.8296	17.7926	14.6045
Bradyrhizobium_erythrophlei	14.3291	5.6385	11.4278	3.00747	33.3367	26.2606	12.9076	63.0593	12.0563	36.9321	56.042	12.9924	14.3785	5.52067	23.2589	31.1505	7.52187	20.3061	16.6705	14.1259	6.02579	8.25581	4.8708	15.5615	40.1666	15	19.1579	9.6317	17.1333	24.1686	22.3838	2.7393	16.5356	5.36264	22.563	2.83546	46.8123	14.3175	20.1333	26.6889	4.17272
Methylobacterium_phyllosphaerae	422.23	56.385	210.895	35.0871	757.369	926.782	234.919	1164.94	837.915	871.957	880.66	376.779	326.477	102.685	290.361	721.533	283.951	201.993	253.392	212.976	34.1462	36.7759	144.732	199.023	379.351	167	198.637	30.8214	258.007	545.52	381.968	62.0909	420.907	29.4945	445.107	22.6837	1183.31	192.491	653.212	338.059	53.2022
Protobothrops_mucrosquamatus	117.498	176.673	114.278	147.366	180.227	133.492	151.449	187.519	94.1901	140.522	200.15	97.443	103.187	92.7473	140.303	126.775	109.067	142.143	133.364	145.606	122.524	272.442	1944.84	153.158	158.881	96	131.08	268.724	115.901	132.927	98.9218	150.662	135.291	127.81	78.9706	161.621	250.966	170.22	213.636	247.119	143.959
Gallus_gallus	106.99	87.3968	67.5281	90.2241	206.271	65.6516	61.9565	132.756	37.676	175.653	117.421	209.178	81.6191	58.5191	69.7766	67.3721	77.0992	80.1558	51.6786	71.7163	71.3052	152.357	338.173	104.016	93.722	98	86.7147	222.492	102.8	272.76	44.0455	92.2233	225.486	72.3956	86.1497	90.7346	165.144	75.5648	104.022	137.398	136.657
Equus_caballus	482.412	212.384	359.457	309.769	310.448	204.614	281.386	287.086	331.549	295.457	218.831	378.079	329.86	450.487	311.369	249.929	519.009	438.185	289.233	431.384	372.595	200.391	169.086	257.174	199.048	469	257.119	110.765	464.614	448.845	328.536	267.539	438.945	398.623	334.343	251.411	244.464	462.934	135.34	159.145	415.186
Chlamydotis_macqueenii	199.652	418.189	158.951	347.864	311.49	225.404	346.784	275.47	177.831	267.532	346.927	281.935	179.731	158.995	244.593	170.966	173.003	167.793	235.888	146.692	193.83	463.827	361.135	340.715	388.277	152	216.787	559.602	157.223	279.665	250.554	277.583	223.982	190.374	265.628	334.584	403.106	202.832	472.013	355.851	222.197
Entamoeba_dispar	0	0.93975	1.03889	1.00249	2.08355	2.18839	0.860507	3.31891	0.753521	0	1.33433	3.89772	2.11449	1.10413	3.75143	0.724431	3.76094	2.13749	0.833526	2.17322	3.0129	2.25159	2.78332	9.00929	2.67777	2	2.01662	7.70536	2.01568	3.45266	0.722057	0.913102	7.51619	2.68132	2.05118	2.83546	9.1024	187.719	4.47406	1.97695	0
Vibrio_toranzoniae	3055.91	7039.67	3146.81	5404.42	11465.8	7557.59	3929.08	8214.31	1410.59	6056.86	6707.69	4412.22	1743.18	1328.27	4182.09	3302.68	1218.54	4211.92	4081.78	2937.11	3064.12	6128.06	3813.14	5209.83	8163.63	2366	5987.35	8685.87	3426.65	9028.69	2269.43	4257.79	5237.28	1511.37	4285.95	5967.69	8874.84	1557.43	10044.3	6917.35	1394.73
Steinernema_monticolum	2684.31	7234.2	2664.76	3566.86	4357.74	3898.61	5209.51	4321.22	2351.74	1238.58	5221.25	1384.99	1977.04	2937	4425.94	3438.87	1748.84	2946.53	3705.86	2658.94	3816.34	3859.97	3594.65	2032.82	2853.61	1700	4249.02	9580.65	2654.65	3342.17	1601.52	2475.42	1647.55	3976.4	2293.22	6490.36	4542.1	2904.87	6525.41	6955.91	3021.05
Glossina_austeni	48.7188	106.192	65.4503	30.0747	95.8431	86.4413	105.842	107.865	50.4859	37.8329	122.759	32.481	41.8668	60.7274	66.7755	74.6164	69.5773	20.3061	24.1722	56.5038	69.2966	133.594	95.3286	59.7889	87.4739	52	95.7895	183.965	16.1254	60.4215	41.1573	82.1791	78.1684	63.4579	35.8957	39.6964	153.44	52.4976	117.444	155.191	79.2817
Nephila_clavipes	177.68	308.238	151.678	224.558	253.151	144.434	217.708	316.956	111.521	186.462	374.948	128.625	173.388	112.622	192.073	165.895	231.298	181.686	150.868	140.173	163.701	348.996	262.327	248.984	191.907	132	220.82	808.099	170.325	271.033	118.417	201.795	341.235	146.579	147.685	245.74	440.816	213.172	253.903	265.9	206.55
Ara_macao	164.307	309.178	316.862	140.349	280.237	222.121	222.011	273.81	116.042	217.989	254.858	155.909	178.885	279.346	292.612	215.88	159.84	115.424	132.531	217.322	203.873	352.748	274.852	194.928	443.618	272	378.116	363.115	110.862	208.886	146.578	182.62	181.892	192.161	187.683	144.608	354.994	175.788	345.621	312.358	157.52
Solenopsis_invicta	58.2716	96.7943	36.3613	55.1369	90.6343	66.7458	62.817	86.2917	19.5915	78.3681	88.066	33.7802	41.4439	23.1868	48.0183	43.4658	52.6531	32.0623	24.1722	30.4251	50.2149	122.336	77.237	78.6265	61.5888	28	49.4072	535.522	45.3527	63.8741	32.4926	52.9599	69.1489	48.2637	47.1772	64.2704	94.925	55.6793	90.5996	83.032	46.9431
Propithecus_coquereli	10386.7	6210.81	9617.04	9490.57	7898.72	8943.94	6984.74	6984.65	8696.38	10316.7	7200.06	11517.8	11778.1	10689.1	7789.47	8636.66	11079.7	9669.99	8897.89	10034.8	10088.2	6505.58	6441.98	10341	9340.96	12102	7340.5	4946.84	10116.7	9938.47	9778.82	8514.67	10966.1	8943.09	9555.44	7335.33	6695.46	9318.33	5408.01	5595.76	9776.69
Thlaspi_arvense	19.1054	28.1925	21.8168	24.0598	28.1279	16.4129	11.1866	29.8702	12.0563	12.611	32.024	15.5909	20.722	19.8744	23.2589	18.1108	28.207	23.5124	20.8381	14.1259	15.0645	34.5243	39.6622	22.9327	24.0999	16	24.1995	52.0112	18.1411	25.8949	18.7735	30.1324	36.0777	18.7692	19.4862	22.6837	46.8123	20.6809	27.9628	19.7695	25.0363
Nannochloropsis_gaditana	13.3738	16.9155	9.35004	11.0274	3.12532	6.56516	3.44203	6.63782	13.5634	18.0156	1.33433	5.19696	9.72663	5.52067	4.50172	11.5909	9.40234	7.48121	5.83468	10.8661	13.0559	6.75476	7.65412	8.19026	1.78518	4	7.05817	12.5212	9.07055	20.7159	19.4955	9.13102	10.5227	4.46886	14.3583	2.83546	15.6041	15.113	6.71108	3.9539	8.34544
Lasioglossum_albipes	10.508	17.8553	14.5445	18.0448	32.295	10.9419	13.7681	23.2324	7.53521	28.825	26.6867	12.9924	12.6869	7.72894	8.25315	9.4176	15.0437	4.27497	13.3364	11.9527	10.043	27.7695	32.0081	18.0186	13.3889	13	5.04155	123.286	9.07055	20.7159	5.0544	17.3489	31.568	18.7692	10.2559	12.287	45.512	9.54503	11.1851	18.781	12.5182
Ideonella_sakaiensis	2.86581	6.57825	4.15557	7.01743	13.543	6.56516	6.02355	16.5946	2.26056	9.9086	13.3433	6.4962	7.61215	2.20827	10.504	15.9375	5.64141	10.6874	8.33526	6.51966	4.0172	3.75264	3.47914	7.37124	18.7444	5	8.06648	7.70536	2.01568	6.90531	4.33234	3.65241	4.50971	0	9.23032	4.72576	2.60069	3.18168	8.94811	2.96543	3.12954
Pseudogymnoascus_sp._VKM_F-4517_(FW-2822)	380.198	969.822	417.635	461.145	587.56	870.978	786.504	653.826	596.035	374.725	747.227	332.605	543.423	482.507	775.045	576.647	330.962	413.604	833.526	382.487	560.399	569.651	758.453	260.45	460.577	435	730.017	1309.91	420.269	531.709	505.44	508.598	338.229	570.227	619.457	1000.92	638.468	418.39	1124.11	1261.3	443.352
Helicoverpa_armigera	21.9712	22.554	18.7001	18.0448	25.0026	12.0361	20.6522	24.8918	13.5634	20.718	30.6897	11.6932	22.8364	16.562	15.756	18.1108	31.968	14.9624	19.1711	14.1259	13.0559	32.2727	26.4415	30.304	15.174	17	13.108	31.7846	23.1803	36.2529	10.1088	21.9144	45.0971	16.0879	27.691	19.8482	40.3106	19.8855	17.8962	20.758	29.2091
Chenopodium_suecicum	17.1949	14.0963	5.19447	15.0373	25.0026	10.9419	11.1866	19.9135	6.02817	20.718	33.3583	9.09468	14.8014	14.3537	15.0057	10.8665	15.0437	7.48121	10.0023	6.51966	14.0602	15.0106	19.4832	27.0279	22.3148	12	17.1413	26.0056	9.07055	18.9896	7.22057	9.13102	37.5809	8.04396	7.17914	8.50637	29.9079	13.5221	12.3037	7.90781	16.6909
Lautropia_mirabilis	8.59744	5.6385	2.07779	3.00747	54.1722	4.37677	5.16304	19.9135	8.28873	5.40469	2.66867	1.29924	2.96028	0	6.00229	17.3863	7.52187	3.20623	2.50058	3.25983	4.0172	6.75476	5.56663	8.19026	13.3889	6	9.07479	13.4844	28.2195	3.45266	8.66468	4.56551	1053.77	4.46886	4.10237	0.945152	3.90103	52.4976	4.47406	288.635	5.2159
Nannochloropsis_limnetica	643.853	1421.84	487.241	652.621	1629.33	1450.9	1028.31	1340.84	441.563	842.231	1276.96	605.446	1105.03	326.824	1358.77	1182.27	473.878	573.915	500.949	428.125	879.766	1778.75	1185.69	924.681	767.628	372	723.967	1772.23	649.048	966.744	680.9	640.997	508.094	661.392	1391.73	1028.33	1237.93	1114.38	2191.17	1059.65	833.501
Mesitornis_unicolor	86.9297	94.9148	66.4892	72.1793	93.7596	67.84	83.4692	112.843	48.2253	109.895	114.753	59.765	57.9369	49.686	57.772	63.0255	92.143	61.9871	64.1815	60.8502	62.2665	135.846	159.345	88.4548	65.1591	71	71.59	126.175	55.4311	96.6744	45.4896	70.3088	136.795	65.2454	51.2796	77.5025	149.539	85.9052	83.8885	101.813	59.4613
Ascocoryne_sarcoides	15.2843	3.759	8.31115	7.01743	3.12532	8.75355	6.02355	3.31891	6.78169	6.30548	0	9.09468	11.8411	11.0413	10.504	5.07102	7.52187	5.34372	3.3341	10.8661	22.0946	33.0232	15.3082	0	4.46295	3	6.04986	8.66853	12.0941	10.358	10.8309	8.21791	10.5227	3.57509	18.4606	3.78061	6.50171	10.3404	1.11851	3.9539	15.6477
Fusarium_cuneirostrum	2.86581	12.2168	1.03889	5.01245	6.25064	6.56516	8.60507	11.6162	3.7676	0	6.67167	2.59848	4.22897	1.10413	9.00343	5.79545	7.52187	5.34372	4.16763	4.34644	14.0602	9.75687	7.65412	6.55221	5.35554	0	2.01662	22.1529	3.02352	1.72633	12.275	9.13102	7.51619	3.57509	3.07677	6.61607	7.80206	7.95419	6.71108	5.93086	11.475
Mochlonyx_cinctipes	114.633	316.696	95.5782	186.463	239.608	323.881	206.522	245.6	88.9154	201.775	268.201	113.034	100.65	75.0811	162.062	209.36	103.426	113.287	146.701	84.7556	192.825	400.782	594.238	313.687	313.299	92	169.396	581.755	121.948	153.643	184.847	205.448	133.788	130.491	107.687	253.301	308.181	128.062	294.169	291.6	121.009
Ochotona_princeps	6630.54	5495.66	5959.09	6592.37	5460.97	5159.12	5354.08	5424.76	5473.57	5908.23	6283.38	6669	7246.34	7652.76	5867.24	5221.7	7034.83	6259.63	6123.91	6510.97	5896.24	5499.87	5144.26	6360.56	6587.32	7012	5021.39	5271.43	6776.71	7165.99	5582.95	5316.99	7078.75	5468.1	6315.59	6425.15	6119.41	6001.43	5688.76	4890.98	6111.99
Malaclemys_terrapin	189.144	340.19	207.779	336.837	410.459	285.584	289.991	418.183	137.894	299.06	352.264	141.617	139.133	133.6	271.604	222.4	176.764	249.017	256.726	211.889	211.907	589.165	393.143	339.077	404.344	153	243.003	515.296	183.427	305.56	156.686	303.15	225.486	195.736	180.504	299.613	591.656	265.67	399.309	412.194	221.154
Loa_loa	11.4633	12.2168	9.35004	4.00996	12.5013	9.84774	6.88406	11.6162	2.26056	9.00782	8.006	5.19696	8.45794	6.62481	6.00229	3.62215	5.64141	5.34372	6.66821	5.43305	7.03009	13.5095	19.4832	13.9234	3.57036	9	15.1247	16.3739	8.06271	13.8106	6.49851	6.39171	18.0389	8.04396	4.10237	5.67091	22.1058	12.7267	6.71108	13.8387	7.30226
Hordeum_vulgare	1834.12	2914.17	1673.66	2025.03	2154.39	2777.06	1838.04	2992	1450.53	1229.57	2489.87	830.214	1368.92	1306.19	2296.63	1718.35	1510.02	1859.61	2422.23	1597.32	2037.72	1703.7	1626.85	1345.66	1628.09	1330	2414.9	3856.53	1655.88	2516.99	1098.25	1098.46	1231.15	1283.46	1520.95	2227.72	2592.88	1737.19	3977.44	2395.08	1288.33
Myzus_persicae	37.2556	60.144	42.5946	35.0871	95.8431	51.4271	49.0489	84.6323	32.4014	45.9399	96.072	24.6856	46.0958	29.8116	58.5223	60.8522	45.1312	41.681	31.674	33.6849	48.2063	78.0549	59.8413	88.4548	62.4813	46	65.5402	5820.44	40.3135	93.2217	36.1029	65.7433	93.2008	27.707	32.8189	59.5446	115.731	97.0411	71.5849	76.1127	57.3749
Fasciola_hepatica	32.4792	33.831	27.0112	41.1021	52.0887	17.5071	39.5833	41.4864	21.0986	30.6266	40.03	27.284	31.2944	27.6034	35.2634	33.3238	33.8484	34.1998	29.1734	17.3858	38.1634	66.797	52.883	42.5894	34.811	27	37.3075	188.781	45.3527	48.3372	30.3264	32.8717	46.6004	32.1758	29.7422	49.1479	97.5257	33.4076	42.5035	29.6543	40.684
Macleaya_cordata	22.9265	23.4938	14.5445	23.0573	29.1696	10.9419	16.3496	33.1891	10.5493	26.1227	21.3493	14.2916	10.9953	8.83308	9.00343	13.0398	22.5656	10.6874	12.5029	10.8661	22.0946	41.2791	30.6165	18.8376	23.2074	8	21.1745	20.2266	17.1333	20.7159	12.275	27.393	15.0324	15.1941	15.3839	24.574	37.7099	15.113	16.7777	28.6658	12.5182
Sterkiella_histriomuscorum	14.3291	7.518	8.31115	5.01245	10.4177	8.75355	6.88406	6.63782	3.7676	3.60313	12.009	7.79544	9.72663	3.3124	3.00114	9.4176	9.40234	6.41246	4.16763	3.25983	6.02579	11.2579	7.65412	8.19026	8.03332	4	9.07479	14.4475	6.04703	10.358	7.22057	7.30481	21.0453	9.8315	6.15355	4.72576	23.4062	3.97709	14.5407	7.90781	4.17272
Schistosoma_rodhaini	194.875	748.041	409.324	334.832	36.4621	427.83	407.02	615.658	302.162	159.438	545.742	185.791	222.867	224.139	399.152	467.258	240.7	302.454	343.413	245.574	340.457	303.964	349.306	157.253	135.674	187	532.388	844.7	319.485	350.445	208.674	296.758	184.898	336.059	230.758	547.243	457.721	343.621	754.997	631.636	328.602
Methylobacterium_aquaticum	101.259	47.9273	70.6448	32.0797	217.731	214.462	85.1902	245.6	155.225	173.851	272.204	142.916	57.9369	79.4977	66.0252	315.852	63.9359	117.562	120.861	121.7	32.1376	17.2622	39.6622	81.9026	296.34	85	101.839	33.7109	57.4468	105.306	118.417	31.0455	102.22	20.5568	174.351	16.0676	257.468	159.879	128.629	257.004	31.2954
3300005818_____Ga0077106_102542	16.2396	28.1925	14.5445	45.112	19.7937	38.2968	32.6993	21.5729	18.838	15.3133	20.015	9.09468	8.03504	12.1455	20.2577	44.1903	3.76094	0	54.1792	13.0393	17.0731	32.2727	32.0081	20.4757	20.5296	5	33.2742	52.0112	0	12.0843	13.7191	15.5227	9.01943	16.9817	12.3071	85.0637	24.7065	24.658	35.7924	43.4929	16.6909
3300005915_____Ga0075122_10000531	10.508	7.518	110.123	4.00996	6.25064	18.6013	1.72101	19.9135	8.28873	506.24	5.33733	3.89772	3.80607	1.10413	3.00114	3.62215	18.8047	4.27497	8.33526	1.08661	7.03009	252.178	232.407	4.91416	2.67777	3	0	0.96317	3.02352	10.358	2.88823	3.65241	4.50971	2.68132	4.10237	2.83546	271.772	19.8855	3.35554	2.96543	3.12954
Tetrahymena_borealis	14.3291	15.036	7.27225	13.0324	19.7937	7.65935	14.6286	24.8918	10.5493	18.0156	21.3493	7.79544	15.2243	9.93721	9.75372	11.5909	20.6852	11.7562	5.00115	5.43305	11.0473	32.2727	13.9166	21.2947	15.174	4	13.108	21.1897	8.06271	20.7159	9.38674	14.6096	24.0518	8.04396	9.23032	7.56122	29.9079	11.9313	12.3037	14.8271	19.8204
Orchesella_cincta	21.9712	45.108	11.4278	32.0797	40.6291	21.8839	24.0942	28.2108	5.27465	26.1227	41.3643	6.4962	13.9556	20.9786	13.5051	13.0398	11.2828	23.5124	15.837	16.2992	25.1075	42.7801	64.0163	45.0464	31.2407	19	15.1247	121.359	19.1489	27.6212	13.7191	19.1751	30.0648	20.5568	12.3071	41.5867	53.3141	29.4305	33.5554	34.5967	31.2954
Drosophila_kikkawai	23.8818	24.4335	17.6612	19.0473	26.0443	17.5071	19.7917	19.9135	24.1127	30.6266	36.027	19.4886	38.4836	20.9786	36.0137	17.3863	22.5656	14.9624	15.0035	23.9054	23.0989	39.0275	38.2706	36.0372	14.2814	18	13.108	30.8214	25.196	20.7159	19.4955	24.6537	25.555	24.1319	30.7677	18.903	46.8123	26.2488	22.3703	26.6889	43.8136
Musa_acuminata	62.0926	49.8068	25.9723	40.0996	54.1722	22.9781	26.6757	39.8269	15.0704	34.2297	34.6927	28.5833	38.4836	17.6662	23.2589	31.1505	47.0117	34.1998	23.3387	34.7715	24.1032	54.038	35.4873	73.7124	41.0592	14	30.2493	53.9375	25.196	32.8002	31.0485	70.3088	36.0777	23.2381	28.7166	27.4094	61.1161	23.8626	52.5702	63.2625	20.8636
Leuciscus_waleckii	1880.93	2238.49	2212.84	2654.59	1618.92	3543	3706.21	2356.43	2360.03	3441.89	2176.3	1544.8	1756.71	2059.21	3780.69	2847.74	1908.68	1798.7	2135.49	1875.49	2955.65	2533.03	2749.22	1068.83	1321.03	2301	2236.43	2278.86	2521.61	2004.27	2256.43	1292.95	1587.42	1675.82	1861.45	2371.39	3729.38	2411.71	3111.71	2221.11	1634.66
3300002149_____C687J26657_10000305	26.7476	143.782	46.7502	79.1967	80.2165	51.4271	94.6558	69.6972	15.8239	23.4203	66.7167	18.1894	11.4182	7.72894	43.5166	42.017	9.40234	43.8185	53.3457	49.9841	47.202	131.342	77.9328	86.8168	148.17	31	85.7064	183.965	22.1724	53.5162	32.4926	67.5695	15.0324	26.8132	24.6142	97.3507	72.8192	6.36335	123.037	39.539	29.2091
Salmonella_enterica	1214.15	2933.9	2637.75	683.698	2850.29	2486.01	2482.56	2492.5	1278.72	1077.34	2657.99	1096.56	1773.63	2062.52	2594.49	2215.31	1107.6	2682.55	2648.94	2297.09	1835.86	2221.56	2594.75	1340.75	2574.23	682	4093.74	4570.24	1739.53	1905.87	1361.08	1412.57	1151.48	1747.33	1846.06	2014.12	2340.62	1742.76	3754.85	2229.01	1358.22
Candida_orthopsilosis	21.016	22.554	57.1391	22.0548	34.3785	25.1664	24.0942	21.5729	18.838	16.2141	46.7017	9.09468	7.18925	32.0199	33.0126	41.2926	30.0875	0	39.1757	49.9841	24.1032	25.518	41.0539	10.6473	28.5629	27	63.5236	50.0848	1.00784	27.6212	15.8853	42.0027	13.5291	17.8755	8.20473	26.4643	35.1093	34.203	23.4888	30.6428	14.6045
Corvus_cornix	17.1949	308.238	159.99	145.361	17.7101	495.67	340.761	311.978	182.352	249.517	241.514	198.784	252.047	86.1225	208.58	420.894	107.187	131.455	153.369	132.566	181.778	219.154	206.661	144.149	72.2998	15	215.778	403.568	254.983	196.801	236.113	133.313	157.84	173.392	296.396	186.195	297.778	187.719	506.687	268.865	148.132
Neolamprologus_brichardi	54.4505	125.927	65.4503	57.1419	143.765	113.796	99.8189	119.481	54.2535	69.3602	134.768	44.1741	53.285	60.7274	105.04	89.8294	54.5336	71.6058	91.6878	58.677	83.3568	143.351	128.033	67.9792	113.359	44	112.931	215.75	70.5487	91.4954	69.3175	103.18	84.1813	63.4579	54.3564	154.06	214.557	77.1556	164.422	133.444	58.4181
Habropoda_laboriosa	26.7476	45.108	16.6223	37.0921	48.9633	18.6013	41.3044	31.5297	12.0563	41.436	36.027	14.2916	11.8411	7.72894	15.756	19.5596	22.5656	18.1686	37.5087	16.2992	24.1032	66.0465	22.2665	37.6752	29.4555	20	22.1828	183.002	29.2273	32.8002	10.1088	23.7406	33.0712	13.4066	10.2559	60.4898	55.9147	34.203	30.1999	46.4584	26.0795
Lyrurus_tetrix	16.2396	33.831	27.0112	41.1021	36.4621	22.9781	30.1178	34.8486	10.5493	43.2375	40.03	24.6856	19.0304	7.72894	30.0114	20.2841	20.6852	19.2374	20.8381	31.5117	21.0903	67.5476	70.2787	28.6659	33.9184	16	26.2161	65.4955	28.2195	17.2633	18.7735	33.7848	19.5421	23.2381	24.6142	31.19	55.9147	15.9084	38.0295	37.5621	23.9931
Colletotrichum_tofieldiae	13.3738	10.3373	10.3889	11.0274	6.25064	5.47097	4.30254	11.6162	13.5634	19.8172	8.006	19.4886	18.6075	15.4579	7.50286	2.17329	11.2828	10.6874	9.16878	5.43305	3.0129	7.50528	2.08749	9.00929	6.24813	8	5.04155	0.96317	10.0784	6.90531	4.33234	11.8703	9.01943	10.7253	21.5374	3.78061	5.20137	13.5221	4.47406	1.97695	13.5613
Eschrichtius_robustus	1827.43	1762.97	1948.96	1828.54	2054.38	1775.88	1597.96	2084.28	1685.63	1967.31	1882.74	2108.67	1871.74	1815.2	1852.46	1811.8	1908.68	1837.17	1737.07	1817.9	1681.2	1964.88	1852.3	1983.68	2099.37	1892	1805.88	1986.06	1743.56	2000.81	1847.74	1703.85	1886.56	1665.99	1969.14	1742.86	2029.84	1891.51	1956.28	1857.35	1697.25
Bacillus_sp._MKU004	1.91054	10.3373	4.15557	5.01245	5.20887	7.65935	6.02355	6.63782	2.26056	11.7102	9.34033	7.79544	6.76635	3.3124	4.50172	5.79545	5.64141	4.27497	6.66821	5.43305	3.0129	7.50528	6.95829	7.37124	8.92591	9	8.06648	13.4844	5.03919	3.45266	4.33234	3.65241	3.00648	3.57509	10.2559	1.8903	2.60069	6.36335	12.3037	6.91933	5.2159
Rhytidhysteron_rufulum	6.6869	6.57825	4.15557	8.01992	11.4595	7.65935	15.4891	11.6162	6.78169	11.7102	13.3433	1.29924	4.65187	4.41654	8.25315	4.34658	1.88047	4.27497	1.66705	1.08661	12.0516	20.2643	9.7416	11.4664	1.78518	0	4.03324	10.5949	5.03919	1.72633	4.33234	8.21791	12.0259	7.15018	7.17914	4.72576	11.7031	2.38626	8.94811	4.94238	9.38862
Clupea_harengus	1318.27	2380.39	889.293	1213.01	2737.78	3516.74	801.993	1357.44	1244.82	1593.48	1842.71	1166.72	1516.09	1173.69	1650.63	2702.85	1077.51	1641.59	1847.93	1398.47	1527.54	2573.56	1907.96	1676.55	1260.34	1256	1083.93	2994.49	1689.14	1420.77	677.29	1092.07	1316.84	1353.17	1458.39	1923.39	1929.71	1828.67	3159.8	2267.56	1683.69
Aeromonas_dhakensis	44.8978	93.0353	75.8392	87.2166	94.8013	163.035	117.89	71.3566	50.4859	70.261	148.111	59.765	60.4743	61.8315	95.2863	126.775	41.3703	68.3996	95.0219	41.2912	64.2751	72.0507	95.3286	34.3991	73.1924	53	88.7313	151.218	71.5565	86.3164	57.7646	64.8302	52.6133	74.1831	67.689	137.992	128.734	40.5664	155.473	104.778	65.7204
Chlamydomonas_debaryana	32.4792	6.57825	24.9334	4.00996	43.7545	17.5071	16.3496	18.254	42.1972	80.1696	14.6777	19.4886	36.3692	18.7703	26.26	10.142	26.3266	19.2374	17.504	18.4724	2.0086	30.7717	22.9624	9.82832	27.6703	27	13.108	2.88951	31.243	36.2529	24.5499	10.0441	28.5615	4.46886	59.4843	0.945152	48.1127	19.0901	12.3037	7.90781	16.6909
Capsella_rubella	7.64217	17.8553	8.31115	11.0274	26.0443	15.3187	14.6286	16.5946	5.27465	6.30548	16.012	2.59848	5.49766	7.72894	6.75257	5.07102	9.40234	2.13749	10.0023	7.60627	11.0473	18.0127	11.8291	14.7425	19.637	4	18.1496	22.1529	4.03135	6.90531	5.0544	9.13102	12.0259	8.93773	10.2559	23.6288	26.0069	11.1359	24.6073	22.7349	5.2159
Nicotiana_sylvestris	6.6869	13.1565	9.35004	7.01743	12.5013	9.84774	6.88406	23.2324	9.04225	16.2141	17.3463	6.4962	10.5724	5.52067	8.25315	10.142	16.9242	7.48121	11.6694	4.34644	10.043	28.5201	13.2207	12.2854	8.03332	7	16.133	23.1161	14.1097	24.1686	7.94263	13.6965	15.0324	6.25641	9.23032	10.3967	45.512	15.113	10.0666	9.88476	5.2159
Arabidopsis_halleri	7.64217	14.0963	11.4278	9.02241	9.37596	10.9419	3.44203	16.5946	4.52112	12.611	21.3493	1.29924	6.76635	2.20827	3.75143	11.5909	5.64141	8.54995	5.83468	9.7795	5.02149	13.5095	9.04578	8.19026	6.24813	5	8.06648	9.6317	7.05487	5.17898	3.61029	2.7393	15.0324	1.78755	7.17914	4.72576	5.20137	7.95419	13.4222	6.91933	9.38862
Opisthocomus_hoazin	147.112	242.456	180.767	174.433	212.522	224.31	171.241	275.47	123.577	145.927	301.559	102.64	144.631	143.537	222.835	238.338	191.808	208.405	155.869	128.22	160.688	216.903	329.127	132.682	139.244	168	218.803	331.33	183.427	231.328	111.919	156.14	175.879	132.278	104.61	224.946	366.697	235.444	260.614	257.004	173.168
Heliconius_elevatus	169.083	441.683	60.2558	240.598	262.527	223.215	236.64	331.891	95.6971	227.898	254.858	168.901	142.516	41.9571	257.348	187.628	122.23	72.6746	90.8543	49.9841	180.774	403.034	196.224	267.003	142.814	55	134.105	856.258	123.964	108.759	130.692	133.313	144.311	192.161	199.99	295.833	245.765	210.786	626.368	333.116	155.434
Neurospora_sublineolata	385.93	670.982	399.974	437.086	945.93	653.233	649.683	715.226	309.697	272.937	741.889	327.408	444.042	325.72	970.12	563.607	353.528	400.779	430.099	344.456	422.81	951.67	795.332	549.567	774.769	278	619.103	1046.97	502.911	529.983	371.859	412.722	303.654	430.799	577.408	645.539	686.581	318.168	1200.17	484.353	453.783
3300017951_____Ga0181577_10002757	8.59744	10.3373	3.11668	6.01494	4.16709	5.47097	2.58152	0	1.50704	3.60313	1.33433	3.89772	1.26869	1.10413	0.750286	1.44886	3.76094	2.13749	0	3.25983	11.0473	903.636	139.166	4.91416	1.78518	0	3.02493	8.66853	2.01568	1.72633	2.16617	5.47861	6.01295	4.46886	9.23032	3.78061	76.7202	208.4	1.11851	3.9539	5.2159
Helicoverpa_zea	10.508	21.6143	13.5056	8.01992	27.0861	14.2245	19.7917	38.1675	12.0563	14.4125	28.021	7.79544	16.0701	8.83308	12.7549	12.3153	18.8047	14.9624	10.8358	11.9527	15.0645	25.518	160.041	22.9327	13.3889	12	12.0997	42.3795	11.0862	8.63164	10.8309	18.262	33.0712	15.1941	12.3071	14.1773	36.4096	16.7038	21.2518	17.7926	19.8204
[Candida]_glabrata	42.0319	73.3005	44.6724	2.00498	56.2557	48.1445	67.9801	56.4215	18.838	18.0156	74.7227	15.5909	23.6822	58.5191	83.2817	54.3323	33.8484	9.61869	0.833526	38.0314	46.1977	60.0423	55.6663	16.3805	41.0592	32	70.5817	114.617	15.1176	41.4319	28.1602	39.2634	43.5939	42.9011	26.6654	2.83546	100.126	32.6122	85.0071	112.686	38.5977
Pseudomonas_fluorescens	10.508	9.3975	13.5056	2.00498	30.2114	26.2606	10.3261	1110.18	7.53521	17.1149	22.6837	12.9924	9.30374	6.62481	18.7572	19.5596	22.5656	21.3749	16.6705	9.7795	20.086	11.2579	9.04578	18.0186	28.5629	10	38.3158	15.4107	13.1019	25.8949	10.8309	6.39171	16.5356	6.25641	16.4095	9.45152	35.1093	11.1359	26.8443	1425.38	5.2159
Neurospora_africana	12.4185	46.0478	36.3613	33.0822	34.3785	18.6013	62.817	34.8486	14.3169	9.00782	44.033	12.9924	16.493	33.124	51.0194	17.3863	16.9242	13.8937	30.0069	21.7322	29.1247	24.0169	24.354	15.5615	23.2074	15	46.3823	75.1272	8.06271	24.1686	16.6073	16.4358	12.0259	26.8132	22.563	48.2028	37.7099	23.0671	61.5183	44.4814	30.2522
Melampsora_pinitorqua	16.2396	19.7348	3.11668	8.01992	31.2532	28.449	16.3496	34.8486	9.04225	33.3289	37.3613	19.4886	20.2991	4.41654	15.0057	26.0795	13.1633	5.34372	8.33526	9.7795	146.628	25.518	18.0916	41.7703	23.2074	7	10.0831	9.6317	20.1568	29.3476	25.272	20.0882	15.0324	16.0879	18.4606	9.45152	35.1093	3.97709	29.0814	35.5851	9.38862
Bos_indicus	166.217	60.144	234.79	73.1818	137.514	134.586	49.9094	89.6106	158.993	230.6	100.075	246.856	295.182	281.554	156.81	132.571	291.473	209.474	141.699	215.149	89.3826	54.7886	59.1455	66.3411	119.607	276	165.363	45.269	227.772	233.054	91.7012	67.5695	254.047	78.652	205.118	56.7091	110.529	186.128	72.7034	64.2509	94.9294
Methylobacterium_sp._275MFSha3.1	16.2396	2.81925	6.23336	1.00249	19.7937	25.1664	1.72101	36.508	21.8521	18.0156	30.6897	10.3939	9.30374	5.52067	4.50172	18.1108	9.40234	6.41246	13.3364	6.51966	1.0043	0	6.26246	3.27611	27.6703	11	10.0831	0.96317	12.0941	25.8949	12.997	1.8262	16.5356	0	15.3839	0	36.4096	11.1359	31.3184	19.7695	1.04318
Castor_canadensis	9525.01	8528.24	8752.68	8659.51	9461.38	8128.76	8370.15	9503.71	8035.54	8695.25	9832.7	9475.35	71128.8	9272.52	8737.08	8231.71	9586.63	9022.33	7901.82	9088.41	8331.66	8299.34	8258.1	8710.34	9177.62	9261	8449.64	9223.31	9103.81	9845.25	8175.13	80959.2	9538.04	8220.03	8947.26	8149.1	9547.12	9124.25	9309.39	9000.07	60961.4
Erigeron_canadensis	16.2396	20.6745	16.6223	18.0448	27.0861	8.75355	16.3496	26.5513	7.53521	13.5117	34.6927	11.6932	15.6472	6.62481	7.50286	13.0398	22.5656	12.8249	10.0023	14.1259	16.0688	38.2769	28.529	26.2088	18.7444	12	16.133	30.8214	14.1097	27.6212	5.77646	18.262	37.5809	11.619	19.4862	23.6288	42.9113	17.4992	10.0666	18.781	20.8636
Nasalis_larvatus	21332.2	23009.8	21229.8	23764	26100.6	25895.2	22534.1	25698.3	19671.4	24192.3	25392.4	23435.7	22532.8	21741.5	22672.1	24345.9	22383.2	23387.3	25754.3	22551.5	21373.5	25819.7	22210.2	28065.6	31769.1	23257	21266.3	22048.9	23282.1	23531.6	20862.4	23642	23617.4	19729.1	24218.3	23464.4	25437.3	20591	26388	23842	20215.8
Clonostachys_rosea	9.55271	1.8795	9.35004	1.00249	4.16709	4.37677	0.860507	4.97837	4.52112	13.5117	6.67167	7.79544	8.45794	14.3537	9.75372	9.4176	18.8047	9.61869	19.1711	8.69289	2.0086	2.25159	1.39166	0	7.14072	23	14.1163	2.88951	12.0941	6.90531	0.722057	0.913102	16.5356	0.893773	7.17914	1.8903	11.7031	12.7267	2.23703	4.94238	2.08636
Tilletiaria_anomala	13.3738	8.45775	8.31115	6.01494	2.08355	1.09419	5.16304	3.31891	11.3028	4.50391	1.33433	3.89772	15.2243	13.2496	4.50172	4.34658	5.64141	9.61869	4.16763	8.69289	2.0086	0	3.47914	6.55221	2.67777	8	6.04986	0.96317	6.04703	5.17898	16.6073	6.39171	12.0259	7.15018	6.15355	3.78061	5.20137	3.97709	0	1.97695	12.5182
Xanthomonas_gardneri	7.64217	20.6745	13.5056	10.0249	37.5038	29.5432	20.6522	23.2324	14.3169	10.8094	37.3613	24.6856	57.0911	19.8744	52.52	30.4261	28.207	10.6874	2.50058	28.2519	18.0774	27.019	25.0498	14.7425	17.8518	11	18.1496	52.0112	33.2587	32.8002	6.49851	13.6965	25.555	16.9817	62.5611	17.9579	41.611	18.2946	57.0442	18.781	15.6477
Dendrobium_officinale	67.8243	85.5173	85.1893	73.1818	108.344	47.0503	86.0507	89.6106	57.2676	83.7728	128.096	51.9696	82.042	58.5191	74.2783	54.3323	131.633	71.6058	51.6786	58.677	47.202	112.579	95.3286	110.569	50.8777	77	106.881	121.359	78.6114	124.296	49.8219	83.0923	187.905	72.3956	62.5611	81.2831	175.546	68.406	72.7034	74.1357	85.5408
Nocardia_harenae	53.4952	0	155.834	0	26.0443	43.7677	0	18.254	21.0986	49.543	13.3433	68.8597	133.635	210.89	42.016	37.6704	114.709	138.937	89.1873	169.511	1.0043	0.750528	0.695829	0	86.5813	171	88.7313	0	109.854	100.127	3.61029	0	94.704	0	81.0217	0	22.1058	43.748	20.1333	2.96543	0
Ligia_exotica	3661.56	8936.09	4009.09	4598.42	5813.09	7706.4	7324.64	6395.54	2928.18	4902.96	6003.17	3016.83	5541.64	3273.76	5564.87	5870.06	2685.31	3722.43	3683.35	3489.11	5368.98	5591.44	3857.68	3934.6	3783.69	3306	6259.59	11100.5	4820.49	4700.79	3525.8	3039.72	3257.52	4737.89	5869.46	5101.93	6365.18	5719.86	10484.9	9339.12	4458.55
Cynoglossus_semilaevis	104.125	184.191	102.85	125.311	120.846	82.0645	106.703	179.221	79.8732	135.117	161.454	74.0567	119.257	88.3308	105.04	87.6561	86.5016	82.2933	89.1873	93.4485	97.417	177.125	150.995	106.473	133.889	70	96.7978	155.07	92.7211	138.106	96.7556	140.618	129.278	79.5458	94.3544	141.773	239.263	108.177	150.999	146.294	109.534
Drosophila_melanogaster	15.2843	44.1683	11.4278	30.0747	42.7127	12.0361	30.9783	23.2324	6.02817	11.7102	45.3673	7.79544	8.45794	6.62481	10.504	11.5909	18.8047	11.7562	15.837	16.2992	19.0817	56.2896	57.7538	17.1996	18.7444	12	13.108	37.5636	21.1646	69.0531	9.38674	13.6965	16.5356	16.9817	7.17914	58.5994	49.413	12.7267	36.911	37.5621	17.7341
Ursus_maritimus	1432.91	1286.52	1348.48	1463.64	1434.52	1383.06	1241.71	1281.1	1153.64	1619.61	1351.68	1452.55	1399.37	1454.15	1150.19	1190.96	1370.86	1235.47	1367.82	1298.5	1345.76	1527.33	1118.2	1538.13	1706.63	1412	1156.53	1042.15	1353.53	1482.92	1207.28	1161.47	1483.7	1183.36	1302.5	1253.27	1373.16	1355.39	1357.88	1201.99	1382.21
Punica_granatum	33.4345	38.5298	16.6223	37.0921	30.2114	22.9781	28.3967	34.8486	21.0986	36.0313	29.3553	16.8901	25.7967	23.1868	30.0114	22.4574	15.0437	20.3061	25.0058	27.1653	38.1634	75.8034	142.645	45.8655	40.1666	31	41.3407	17897.6	24.1881	29.3476	34.6587	14.6096	85.6846	20.5568	25.6398	29.2997	48.1127	78.7465	38.0295	29.6543	44.8568
3300007606_____Ga0102923_1000130	9.55271	10.3373	2.07779	5.01245	10.4177	12.0361	6.02355	14.9351	2.26056	8.10704	10.6747	1.29924	2.96028	2.20827	6.75257	5.79545	1.88047	5.34372	5.00115	5.43305	2.0086	8.25581	5.56663	11.4664	11.6037	8	12.0997	8.66853	2.01568	3.45266	7.22057	13.6965	1.50324	5.36264	3.07677	8.50637	10.4027	5.56793	8.94811	5.93086	3.12954
Oxytricha_trifallax	27.7029	50.7465	20.7779	23.0573	54.1722	25.1664	37.8623	53.1026	21.8521	26.1227	54.7077	15.5909	32.986	18.7703	28.5109	28.2528	39.4898	29.9248	27.5064	31.5117	18.0774	65.296	44.533	58.1509	33.9184	25	38.3158	69.3482	24.1881	41.4319	20.9397	40.1765	79.6716	31.282	23.5886	29.2997	93.6247	28.6351	43.622	54.3662	43.8136
Phascolarctos_cinereus	1355.53	2109.74	1293.42	1584.94	2054.38	1645.67	1442.21	1954.84	1148.37	1508.81	2130.93	1171.91	1217.52	1110.76	1643.13	1606.79	1342.65	1136.07	1427	1224.61	1287.51	2189.29	2418.7	1534.86	1487.95	1200	1612.29	2275.01	1014.89	1783.3	1188.51	1486.53	1446.11	1346.92	1268.66	1948.9	2375.73	1955.14	1898.12	2519.63	1499.05
Methylobacterium_sp._C1	105.08	29.1323	68.567	11.0274	264.61	310.751	65.3986	391.632	210.986	284.647	258.861	142.916	84.5794	39.7488	87.0332	265.142	124.111	96.1869	121.695	74.9761	19.0817	17.2622	43.8372	77.8075	189.229	77	98.8144	8.66853	74.5801	179.538	115.529	23.7406	108.233	10.7253	159.992	8.50637	401.806	82.7236	247.192	146.294	29.2091
Sarcocystis_neurona	20.0607	22.554	27.0112	34.0847	30.2114	25.1664	18.9312	18.254	18.838	36.0313	20.015	33.7802	27.4883	34.2282	24.7594	19.5596	22.5656	34.1998	33.341	26.0787	20.086	26.2685	32.0081	24.5708	56.2332	42	20.1662	14.4475	55.4311	34.5266	19.4955	22.8275	40.5874	9.8315	48.2028	40.6416	39.0103	21.4763	24.6073	25.7004	15.6477
Euclidium_syriacum	10.508	17.8553	20.7779	14.0349	26.0443	15.3187	17.2101	31.5297	9.79577	18.0156	22.6837	5.19696	15.6472	8.83308	12.0046	20.2841	9.40234	14.9624	14.1699	9.7795	5.02149	21.0148	18.0916	18.0186	15.174	5	13.108	33.7109	11.0862	22.4423	12.275	13.6965	27.0583	7.15018	13.3327	15.1224	41.611	14.3175	13.4222	18.781	10.4318
Amazona_vittata	70.6901	147.541	97.656	96.239	123.971	150.999	123.053	101.227	55.7605	111.697	157.451	85.7498	72.3154	100.476	141.804	117.358	90.2625	134.662	159.203	109.748	102.438	150.106	194.136	82.7217	113.359	97	135.114	228.271	126.988	119.117	71.4836	63.9171	105.227	90.2711	85.1241	131.376	200.253	78.7465	145.407	171.995	86.584
Necator_americanus	7.64217	29.1323	5.19447	14.0349	23.9608	14.2245	15.4891	36.508	5.27465	6.30548	26.6867	6.4962	8.88084	3.3124	12.0046	7.96874	18.8047	17.0999	9.16878	4.34644	6.02579	31.5222	13.9166	22.9327	16.9592	11	15.1247	34.6741	10.0784	12.0843	7.22057	10.0441	18.0389	12.5128	11.2815	16.0676	24.7065	19.8855	19.0147	20.758	14.6045
Chaetura_pelagica	130.872	223.661	171.417	132.329	376.08	196.955	158.333	214.07	116.796	186.462	276.207	193.587	133.635	112.622	165.063	185.454	135.394	132.524	125.029	120.614	135.58	280.698	324.952	171.176	273.133	111	194.604	253.314	114.894	165.727	114.085	231.928	195.421	134.96	124.097	174.853	327.686	148.743	268.443	378.586	214.895
Symbiodinium_minutum	34.3898	24.4335	41.5557	33.0822	50.0051	20.7897	37.8623	64.7188	30.1408	30.6266	52.039	23.3863	32.986	28.7075	36.764	29.7017	33.8484	30.9936	25.0058	30.4251	29.1247	57.0402	48.0122	34.3991	45.5221	23	50.4155	72.2377	33.2587	51.7898	23.1058	38.3503	54.1166	37.5385	42.0493	41.5867	76.7202	27.0442	26.8443	36.5736	30.2522
Eutrema_salsugineum	18.1502	41.349	19.739	51.127	51.0469	47.0503	35.2808	39.8269	15.0704	35.1305	38.6957	18.1894	31.2944	24.291	22.5086	35.4971	37.6094	21.3749	30.0069	15.2125	27.1161	63.0444	43.1414	44.2274	51.7703	14	35.2909	91.5011	24.1881	43.1582	31.0485	52.0468	31.568	25.0256	26.6654	42.5319	50.7134	25.4534	59.2812	36.5736	20.8636
Stegastes_partitus	77.377	139.083	75.8392	103.256	171.893	123.644	104.982	154.329	44.4577	84.6735	150.78	83.1513	56.2453	51.8943	88.5337	92.0027	75.2187	79.087	81.6855	69.5431	69.2966	206.395	132.207	122.854	132.103	62	115.956	442.095	72.5644	136.38	57.0425	118.703	136.795	55.4139	52.3052	131.376	284.775	77.951	170.014	125.536	116.836
Plodia_interpunctella	28.6581	36.6503	40.5168	34.0847	42.7127	13.1303	28.3967	41.4864	18.838	28.825	61.3793	10.3939	30.8715	26.4992	28.5109	21.0085	39.4898	35.2685	36.6751	20.6456	33.1419	39.778	41.0539	36.8562	29.4555	31	32.2659	68.3851	24.1881	36.2529	21.6617	25.5668	51.1101	28.6007	11.2815	54.8188	65.0171	43.748	27.9628	33.6082	27.1227
Macaca_nemestrina	14417	18632.4	13752.9	16312.5	18587.3	20558.8	15983.9	58291.7	13996.6	19364.1	17258.3	16114.5	15997.4	13323.6	15154.3	18108.6	13714.3	14620.4	89008.9	14121.6	14887.7	19239.8	15880.9	19396.2	22031.8	13413	14607.4	18218.4	14488.7	15939.2	16378.4	16383.8	14731.7	13619.3	16980.7	101571	19105.9	15264.1	19090.8	16997.8	13886.8
Renilla_reniformis	29.6134	12.2168	10.3889	25.0622	29.1696	5.47097	15.4891	4.97837	15.0704	48.6422	77.3913	18.1894	72.3154	49.686	32.2623	135.469	13.1633	14.9624	6.66821	9.7795	22.0946	53.2875	31.3123	225.232	11.6037	15	22.1828	330.367	7.05487	36.2529	93.1454	18.262	36.0777	58.989	97.4312	112.473	41.611	20.6809	23.4888	52.3892	43.8136
Besnoitia_besnoiti	25.7923	30.072	17.6612	26.0647	54.1722	43.7677	33.5598	44.8053	14.3169	20.718	30.6897	19.4886	13.5327	9.93721	32.2623	31.875	16.9242	20.3061	20.8381	18.4724	31.1333	39.778	64.0163	27.0279	41.9518	19	26.2161	43.3426	24.1881	15.537	19.4955	19.1751	25.555	21.4505	33.8445	41.5867	42.9113	25.4534	39.148	63.2625	19.8204
Juglans_regia	59.2268	261.251	107.006	174.433	474.007	133.492	149.728	290.405	73.0915	193.668	488.366	110.435	73.1612	54.1026	248.345	88.3805	54.5336	98.3244	158.37	67.3699	125.537	323.478	247.715	217.042	222.255	41	143.18	291.84	106.831	165.727	120.584	259.321	141.304	134.96	123.071	247.63	388.802	115.336	391.48	218.453	146.045
Cryptococcus_neoformans	2.86581	14.0963	8.31115	11.0274	16.6684	13.1303	12.0471	11.6162	1.50704	10.8094	5.33733	3.89772	0.845794	3.3124	8.25315	2.89772	1.88047	3.20623	9.16878	3.25983	4.0172	25.518	6.26246	4.09513	27.6703	0	8.06648	15.4107	5.03919	8.63164	1.44411	6.39171	3.00648	7.15018	6.15355	9.45152	20.8055	4.77251	6.71108	7.90781	7.30226
Calephelis_virginiensis	61.1374	184.191	71.6836	114.284	130.222	77.6877	111.005	262.194	30.1408	99.9868	172.129	32.481	57.9369	56.3109	71.2772	87.6561	60.175	61.9871	67.5156	58.677	69.2966	174.873	119.683	126.949	103.541	44	112.931	216.713	53.4154	110.485	66.4292	82.1791	141.304	67.9267	66.6635	124.76	231.461	86.7006	166.659	112.686	76.1522
3300016461_____Ga0126362_10000182	51.5847	5.6385	44.6724	2.00498	93.7596	238.534	43.0254	139.394	90.4225	118.002	134.768	71.4582	42.2897	28.7075	72.7777	152.855	22.5656	91.912	85.0196	34.7715	13.0559	30.7717	9.04578	39.3133	191.907	34	57.4737	9.6317	45.3527	122.569	56.3205	10.9572	60.1295	8.93773	117.943	6.61607	262.669	60.4518	76.0589	78.0896	9.38862
Panicum_hallii	24.8371	15.036	58.178	17.0423	39.5874	30.6374	12.0471	31.5297	43.7042	54.9477	37.3613	45.4734	51.5934	73.977	36.764	31.1505	60.175	60.9184	38.3422	57.5904	11.0473	48.0338	42.4456	27.0279	32.1333	54	52.4321	30.8214	47.3684	22.4423	10.1088	20.0882	52.6133	7.15018	53.3308	16.0676	78.0206	39.7709	44.7406	11.8617	23.9931
Lolium_perenne	36.3003	124.047	33.2446	61.1519	97.9267	64.5574	59.375	38.1675	28.6338	66.6579	88.066	32.481	35.1005	30.9158	56.2715	44.9147	39.4898	33.1311	35.8416	30.4251	35.1505	90.8139	82.1078	63.065	104.433	25	55.4571	183.002	29.2273	60.4215	54.8763	52.9599	46.6004	30.3883	58.4587	87.8992	91.024	66.0198	106.259	69.1933	29.2091
Ooceraea_biroi	21.016	59.2043	27.0112	26.0647	37.5038	32.8258	30.1178	36.508	26.3732	31.5274	60.045	18.1894	27.4883	24.291	29.2612	35.4971	22.5656	26.7186	10.0023	26.0787	25.1075	37.5264	48.0122	25.3898	27.6703	27	35.2909	69.3482	28.2195	34.5266	11.5529	31.0455	36.0777	25.9194	20.5118	18.903	57.2151	27.0442	34.6739	43.4929	15.6477
Nestor_notabilis	141.38	430.406	159.99	202.503	285.446	356.707	314.946	330.232	111.521	311.671	305.562	194.886	156.895	110.413	208.58	211.534	120.35	123.974	191.711	128.22	197.847	442.812	451.593	350.543	473.966	119	212.754	566.344	167.301	189.896	158.853	230.102	171.369	136.747	232.809	344.035	573.451	229.081	473.131	334.105	157.52
Nicotiana_obtusifolia	54.4505	53.5658	39.478	75.1867	67.7152	41.5793	44.7464	74.6755	36.169	53.1462	88.066	49.3711	46.0958	38.6447	60.7732	37.6704	52.6531	48.0935	83.3526	33.6849	54.2321	104.323	64.7121	75.3504	66.0517	49	48.3989	103.059	37.29	69.0531	36.8249	50.2206	78.1684	28.6007	44.1004	84.1186	88.4233	72.3831	81.6515	46.4584	45.8999
Haplochromis_burtoni	13.3738	26.313	13.5056	26.0647	26.0443	7.65935	13.7681	46.4648	13.5634	18.0156	21.3493	10.3939	14.3785	7.72894	12.7549	18.1108	11.2828	13.8937	5.83468	11.9527	15.0645	36.7759	27.8332	18.0186	23.2074	8	18.1496	54.9007	23.1803	22.4423	6.49851	14.6096	36.0777	16.0879	10.2559	24.574	32.5086	17.4992	21.2518	23.7234	21.9068
Stenotrophomonas_maltophilia	38.2109	20.6745	42.5946	11.0274	63.5482	87.5355	31.8388	114.502	27.8803	81.0704	52.039	42.8749	25.7967	22.0827	39.7652	95.6249	39.4898	35.2685	47.511	46.7243	6.02579	23.2664	11.8291	36.0372	91.9368	24	46.3823	27.9319	28.2195	75.9584	26.7161	3.65241	43.5939	9.8315	49.2284	9.45152	91.024	29.4305	61.5183	535.754	9.38862
Pseudococcus_longispinus	16.2396	23.4938	44.6724	45.112	32.295	39.391	23.2337	43.1459	12.8099	67.5587	34.6927	62.3635	67.6635	36.4364	34.5132	29.7017	28.207	38.4748	31.674	31.5117	20.086	62.2939	41.0539	27.8469	16.9592	47	37.3075	63.5692	56.439	48.3372	10.1088	30.1324	54.1166	25.0256	35.8957	24.574	68.9182	37.3847	36.911	37.5621	30.2522
Actinomyces_sp._oral_taxon_171	27.7029	37.59	36.3613	30.0747	54.1722	32.8258	31.8388	29.8702	17.331	27.0235	48.036	19.4886	33.8318	25.3951	43.5166	36.946	15.0437	30.9936	35.8416	21.7322	24.1032	38.2769	45.2289	27.0279	33.9184	16	44.3657	50.0848	30.2352	43.1582	24.5499	21.0013	22.5486	17.8755	37.9469	31.19	44.2117	27.8397	71.5849	39.539	22.95
Mamestra_configurata	41.0767	46.0478	24.9334	43.1071	53.1304	27.3548	34.4203	58.081	16.5775	27.0235	61.3793	20.7878	37.2149	18.7703	27.7606	24.6306	65.8164	39.5435	22.5052	35.8582	16.0688	52.537	49.4038	34.3991	23.2074	27	35.2909	84.7589	40.3135	48.3372	24.5499	31.0455	49.6069	21.4505	20.5118	50.0931	85.8226	139.198	39.148	47.4468	35.4681
Botryococcus_braunii	4.77636	5.6385	5.19447	14.0349	11.4595	4.37677	8.60507	3.31891	29.3873	21.6188	28.021	5.19696	5.92056	4.41654	27.7606	2.89772	1.88047	3.20623	1.66705	2.17322	5.02149	17.2622	18.7874	45.8655	7.14072	1	5.04155	15.4107	4.03135	0	4.33234	3.65241	10.5227	2.68132	1.02559	4.72576	22.1058	1.59084	4.47406	2.96543	5.2159
Enterobacter_cloacae	0.955271	10.3373	2.07779	8.01992	9.37596	2.18839	6.88406	14.9351	3.7676	4.50391	10.6747	1.29924	2.96028	3.3124	2.25086	7.24431	5.64141	5.34372	2.50058	1.08661	13.0559	15.7611	14.6124	6.55221	5.35554	4	5.04155	66.4587	5.03919	8.63164	3.61029	3.65241	7.51619	3.57509	5.12796	24.574	18.2048	4.77251	4.47406	17.7926	8.34544
Elephantulus_edwardii	12646.8	10262.1	11866.2	12426.9	11036.5	10380.6	9837.32	9594.98	11078.3	10985	9064.13	12536.4	13634.6	13180.1	10725.3	9827.63	12962.1	11336.2	11715.2	12259.1	11643.8	8280.58	7585.23	10902.9	12004.5	92076	10236.4	9894.64	12871.1	13686.3	10773.1	9754.66	13036.1	10789.6	11982	10607.4	10093.3	12200.9	9373.15	9513.09	11657.5
Synstelium_polycarpum	133.738	378.719	361.535	207.515	364.621	791.102	274.502	305.34	347.373	220.692	306.897	340.401	490.138	553.171	916.099	576.647	110.948	372.992	433.433	518.313	239.023	727.262	683.304	329.249	587.325	274	590.87	1321.47	201.568	286.57	203.62	331.456	351.758	221.656	535.359	80.338	302.98	342.825	441.813	218.453	460.043
Tympanuchus_cupido	58.2716	448.261	65.4503	98.244	321.908	228.686	55.933	396.61	201.19	80.1696	447.002	122.129	159.009	245.118	298.614	258.622	77.0992	51.2997	59.1803	294.471	55.2364	265.687	477.339	175.272	220.47	280	70.5817	679.998	59.4625	407.413	50.544	288.54	233.002	247.575	124.097	114.363	439.516	385.778	427.272	622.74	240.975
Solanum_pennellii	26.7476	31.0118	35.3224	36.0896	46.8798	13.1303	20.6522	38.1675	15.0704	41.436	44.033	19.4886	27.4883	14.3537	30.7617	18.8352	30.0875	20.3061	34.1746	19.559	23.0989	63.0444	37.5748	33.5801	27.6703	16	36.2992	66.4587	24.1881	41.4319	12.997	30.1324	49.6069	18.7692	29.7422	34.9706	79.3209	34.9984	24.6073	27.6773	26.0795
Geobacillus_sp._MAS1	142.335	352.406	89.3448	9.02241	287.529	163.035	271.92	214.07	109.261	48.6422	360.27	62.3635	116.297	82.8101	375.143	131.122	139.155	69.4683	5.83468	60.8502	205.881	219.905	214.315	79.4455	99.0776	73	153.263	456.542	161.254	201.98	74.3719	140.618	103.723	213.612	133.327	14.1773	325.086	124.881	452.998	388.471	173.168
Gossypium_hirsutum	18.1502	22.554	11.4278	16.0398	27.0861	17.5071	16.3496	29.8702	9.04225	30.6266	32.024	12.9924	18.6075	12.1455	39.7652	11.5909	13.1633	12.8249	10.0023	8.69289	11.0473	42.7801	30.6165	31.123	15.174	5	21.1745	51.048	19.1489	32.8002	17.3294	27.393	43.5939	17.8755	10.2559	22.6837	53.3141	21.4763	27.9628	22.7349	25.0363
Methylobacterium_salsuginis	10.508	0.93975	15.5834	1.00249	12.5013	24.0723	6.02355	29.8702	7.53521	18.9164	18.6807	6.4962	6.34346	7.72894	4.50172	23.1818	11.2828	12.8249	9.16878	8.69289	3.0129	5.2537	4.17497	4.91416	17.8518	15	15.1247	2.88951	12.0941	17.2633	7.94263	2.7393	16.5356	1.78755	14.3583	0	26.0069	7.15877	17.8962	15.8156	0
Eulemur_flavifrons	1469.21	806.306	1432.63	938.33	1213.67	1118.27	805.435	1169.92	1309.62	1382.7	915.353	1516.21	1659.87	1568.98	1273.24	1229.36	1654.81	1448.15	1083.58	1553.85	902.865	907.389	1286.59	848.511	955.072	1302	1270.47	860.111	1652.86	1460.47	1036.15	900.318	1512.26	988.513	1397.88	873.321	1046.78	1371.3	904.878	1009.23	961.812
Liriomyza_trifolii	9.55271	10.3373	7.27225	6.01494	7.29241	3.28258	3.44203	13.2756	3.01408	5.40469	12.009	1.29924	5.92056	0	2.25086	5.79545	11.2828	8.54995	5.83468	3.25983	4.0172	9.75687	370.181	4.09513	8.03332	5	6.04986	11.558	8.06271	12.0843	1.44411	5.47861	9.01943	3.57509	4.10237	5.67091	11.7031	7.95419	3.35554	9.88476	1.04318
Sebastes_aleutianus	32.4792	32.8913	86.2282	370.921	216.689	75.4993	77.4457	147.692	54.2535	217.089	26.6867	67.5605	50.7477	25.3951	32.2623	29.7017	28.207	53.4372	40.0092	89.1021	87.374	42.0296	77.237	97.4641	21.4222	17	147.213	83.7958	84.6584	70.7794	69.3175	81.266	34.5745	6.25641	23.5886	139.883	41.611	55.6793	57.0442	65.2394	16.6909
Leavenworthia_alabamica	13.3738	12.2168	4.15557	7.01743	12.5013	6.56516	9.46558	14.9351	4.52112	8.10704	9.34033	6.4962	8.45794	2.20827	9.00343	5.07102	20.6852	4.27497	5.00115	5.43305	6.02579	17.2622	12.5249	12.2854	16.9592	11	9.07479	24.0792	5.03919	12.0843	4.33234	7.30481	19.5421	8.04396	9.23032	10.3967	9.1024	7.15877	12.3037	10.8732	8.34544
Gekko_japonicus	987.751	2859.66	784.365	1869.64	2466.92	2727.82	2177.94	2278.43	546.303	1740.31	2775.41	1019.9	818.729	547.651	1931.24	2080.57	582.945	812.245	1479.51	796.486	1449.2	3523.73	2873.08	3149.16	2430.52	751	1140.4	4430.58	825.42	1337.9	960.336	1685.59	901.943	967.956	1348.65	2907.29	3380.89	868.597	3994.21	2866.58	1175.66
Anopheles_koliensis	216.847	587.344	190.117	456.133	430.252	812.986	431.975	529.367	202.697	764.764	418.981	384.575	279.535	123.663	307.617	475.227	131.633	231.917	314.239	186.897	363.556	501.353	313.819	674.878	785.48	145	272.244	578.865	265.062	295.202	366.083	270.278	270.583	241.319	384.597	393.183	537.042	266.465	631.96	608.901	212.809
3300018067_____Ga0184611_1000020	5.73163	7.518	17.6612	4.00996	10.4177	2.18839	2.58152	1.65946	3.7676	59.4516	1.33433	5.19696	2.53738	0	4.50172	2.89772	9.40234	4.27497	4.16763	1.08661	4.0172	69.0486	47.3164	2.45708	11.6037	0	0	2.88951	1.00784	1.72633	1.44411	4.56551	3.00648	0	2.05118	2.83546	50.7134	5.56793	3.35554	1.97695	15.6477
Gossypium_raimondii	17.1949	24.4335	10.3889	17.0423	29.1696	14.2245	18.9312	18.254	11.3028	19.8172	34.6927	10.3939	18.1846	9.93721	17.2566	18.1108	7.52187	19.2374	9.16878	9.7795	15.0645	42.7801	38.2706	26.2088	16.0666	15	17.1413	33.7109	18.1411	17.2633	10.8309	17.3489	36.0777	12.5128	16.4095	17.0127	49.413	19.0901	26.8443	19.7695	20.8636
Bactrocera_latifrons	85.9744	224.6	148.562	69.1718	161.475	226.498	172.101	179.221	70.8309	101.788	237.511	76.6551	60.0514	98.268	126.798	128.224	103.426	81.2245	148.368	88.0155	108.464	171.12	211.532	78.6265	127.64	140	167.38	291.84	62.486	124.296	67.8734	88.5709	106.73	104.571	82.0473	120.034	284.775	116.927	193.503	217.465	117.879
3300000385_____PR_CR_10_Liq_1_inCRDRAFT_1001852	5.73163	18.795	8.31115	3.00747	10.4177	8.75355	11.1866	8.29728	12.0563	9.00782	9.34033	3.89772	1.26869	8.83308	7.50286	6.51988	3.76094	37.406	4.16763	21.7322	15.0645	24.7674	29.2248	7.37124	16.0666	15	19.1579	26.0056	4.03135	3.45266	18.0514	16.4358	3.00648	8.93773	3.07677	9.45152	24.7065	8.74961	12.3037	25.7004	3.12954
Anopheles_stephensi	10.508	20.6745	15.5834	20.0498	33.3367	18.6013	17.2101	18.254	7.53521	16.2141	16.012	14.2916	13.9556	3.3124	9.00343	5.07102	13.1633	14.9624	14.1699	13.0393	12.0516	45.7822	31.3123	13.1044	7.14072	5	16.133	45.269	12.0941	18.9896	7.22057	20.0882	15.0324	9.8315	12.3071	33.0803	37.7099	19.0901	24.6073	12.8502	9.38862
Cymbomonas_tetramitiformis	11.4633	5.6385	11.4278	8.01992	29.1696	7.65935	19.7917	49.7837	11.3028	20.718	28.021	6.4962	11.4182	5.52067	7.50286	4.34658	7.52187	13.8937	15.0035	7.60627	5.02149	28.5201	49.4038	16.3805	2.67777	3	36.2992	23.1161	7.05487	12.0843	5.77646	16.4358	13.5291	8.93773	4.10237	8.50637	20.8055	15.113	22.3703	12.8502	9.38862
Pseudogymnoascus_sp._VKM_F-4520_(FW-2644)	1.91054	8.45775	10.3889	5.01245	8.33418	5.47097	4.30254	4.97837	3.01408	13.5117	8.006	7.79544	5.49766	1.10413	6.75257	10.142	1.88047	3.20623	5.83468	4.34644	3.0129	27.7695	10.4374	2.45708	7.14072	7	6.04986	5.77902	6.04703	5.17898	3.61029	5.47861	10.5227	3.57509	5.12796	10.3967	15.6041	3.18168	10.0666	8.89628	4.17272
Byssochlamys_fulva	25.7923	38.5298	21.8168	16.0398	37.5038	47.0503	24.0942	23.2324	25.6197	20.718	28.021	24.6856	14.8014	27.6034	38.2646	41.2926	20.6852	49.1622	38.3422	32.5983	21.0903	33.7738	41.7497	50.7796	24.0999	31	21.1745	40.4531	23.1803	24.1686	12.997	31.0455	25.555	32.1758	17.4351	38.7512	33.8089	35.7938	46.9776	53.3777	23.9931
Mesobuthus_martensii	6431.84	21174.5	7445.75	10951.2	13729.5	9884.94	12484.2	14005.8	5501.45	4038.21	14417.5	4115.99	6832.75	7493.76	15184.3	8899.63	6250.68	7886.26	8964.57	8382.11	11360.6	14931	8850.94	9500.7	8983.92	7368	11271.9	27086.3	7319.93	10247.5	4176.38	6729.56	5171.14	11401	7686.81	15783.1	13868.2	15186.1	19671.3	23544.5	11776.5
Corynebacterium_singulare	23.8818	20.6745	9.35004	11.0274	23.9608	9.84774	21.5127	31.5297	19.5915	4.50391	4.003	7.79544	1.26869	0	3.00114	21.7329	7.52187	35.2685	9.16878	7.60627	13.0559	64.5454	11.8291	42.5894	34.811	10	26.2161	20.2266	38.2979	27.6212	18.7735	13.6965	10.5227	12.5128	9.23032	20.7934	2.60069	19.0901	8.94811	115.652	9.38862
Puccinia_sorghi	7.64217	15.036	6.23336	12.0299	11.4595	13.1303	6.88406	8.29728	5.27465	27.0235	2.66867	7.79544	6.76635	3.3124	14.2554	7.96874	7.52187	7.48121	10.8358	7.60627	5.02149	48.0338	19.4832	13.9234	15.174	4	9.07479	31.7846	8.06271	5.17898	16.6073	7.30481	7.51619	5.36264	12.3071	18.903	36.4096	10.3404	7.8296	7.90781	5.2159
Nocardia_sp._BMG51109	0.955271	1.8795	0	1.00249	53.1304	40.4851	3.44203	11.6162	1.50704	6.30548	1.33433	0	0.422897	0	4.50172	50.7102	3.76094	11.7562	0	0	0	9.00634	0	3.27611	24.0999	1	3.02493	7.70536	43.3371	0	0	0	9.01943	0.893773	1.02559	3.78061	7.80206	0.795419	2.23703	1.97695	3.12954
Malassezia_cuniculi	4.77636	1.8795	3.11668	9.02241	14.5848	10.9419	8.60507	0	5.27465	9.9086	1.33433	6.4962	0.845794	2.20827	6.00229	95.6249	0	6.41246	0	1.08661	5.02149	8.25581	5.56663	10.6473	136.566	1	1.00831	6.74219	22.1724	1.72633	0.722057	0	4.50971	1.78755	25.6398	0.945152	10.4027	2.38626	6.71108	7.90781	3.12954
Hortaea_werneckii	14.3291	0.93975	15.5834	9.02241	6.25064	2.18839	5.16304	19.9135	5.27465	9.9086	4.003	0	2.11449	1233.32	33.7629	9.4176	3.76094	9.61869	20.8381	5.43305	2528.82	6.75476	6.95829	96.6451	17.8518	7	11.0914	14.4475	11.0862	0	4.33234	3.65241	0	2.68132	2.05118	1.8903	7.80206	4.77251	4.47406	9.88476	4.17272
Drosophila_miranda	16.2396	10.3373	8.31115	9.02241	16.6684	14.2245	9.46558	18.254	7.53521	21.6188	12.009	12.9924	18.6075	17.6662	10.504	11.5909	13.1633	11.7562	13.3364	9.7795	11.0473	40.5285	363.918	17.1996	23.2074	13	11.0914	14.4475	22.1724	5.17898	10.8309	12.7834	15.0324	8.04396	22.563	9.45152	27.3072	15.9084	15.6592	2.96543	4.17272
Citrus_cavaleriei	17.1949	13.1565	4.15557	12.0299	9.37596	14.2245	5.16304	16.5946	12.0563	9.9086	33.3583	7.79544	6.76635	62.9357	14.2554	7.24431	5.64141	9.61869	5.83468	10.8661	27.1161	6.75476	13.2207	83.5407	8.03332	6	4.03324	33.7109	8.06271	10.358	10.1088	6.39171	25.555	9.8315	9.23032	7.56122	19.5051	31.0213	12.3037	172.983	11.475
Alligator_sinensis	103.169	165.396	105.967	105.261	187.519	105.043	104.982	152.67	91.9295	185.561	150.78	126.026	95.1518	94.9556	100.538	107.94	120.35	117.562	86.6867	83.669	86.3697	347.495	199.007	123.673	115.144	108	157.296	187.818	108.847	239.96	87.3689	109.572	127.775	80.4396	105.636	133.266	347.192	171.015	164.422	137.398	166.909
Mesorhizobium_sp._L2C054A000	9.55271	26.313	13.5056	6.01494	16.6684	13.1303	19.7917	23.2324	10.5493	9.00782	17.3463	6.4962	17.3388	8.83308	20.2577	15.9375	22.5656	12.8249	5.00115	11.9527	20.086	17.2622	12.5249	9.82832	7.14072	12	10.0831	30.8214	21.1646	8.63164	9.38674	10.9572	15.0324	9.8315	21.5374	9.45152	19.5051	7.15877	19.0147	16.8041	16.6909
Dasypus_novemcinctus	7715.73	13240.1	6959.55	6095.14	6113.12	14990.4	12353.4	9221.6	7441.77	11003.1	10547.9	11185.2	10380.4	7487.14	11113.2	10179	7501.19	6705.3	5150.36	6543.57	9905.4	14380.1	9624.01	8372.91	13261.2	7080	7785.17	14800.1	9139.08	9496.53	8934.73	7963.16	8780.41	9613.42	12141	6101.9	12201.1	7926.35	16181.5	13054.8	9412.62
Bradyrhizobium_japonicum	8.59744	1.8795	2.07779	6.01494	16.6684	8.75355	5.16304	23.2324	3.7676	26.1227	13.3433	5.19696	8.03504	3.3124	3.00114	13.7642	15.0437	2.13749	5.00115	5.43305	1.0043	3.75264	7.65412	17.1996	0.892591	2	4.03324	1.92634	3.02352	8.63164	3.61029	2.7393	13.5291	2.68132	8.20473	0.945152	16.9045	8.74961	10.0666	6.91933	0
Morus_notabilis	2033.77	67.662	1368.22	62.1544	71.8823	55.8039	2888.72	68.0377	28.6338	1166.51	69.3853	48.0719	48.6332	29.8116	43.5166	47.088	1474.29	38.4748	22.5052	28.2519	68.2923	78.8055	121.074	73.7124	60.6962	44	2054.94	111.728	58.4546	62.1478	1524.26	52.9599	60.1295	133.172	38.9725	55.764	89.7237	34.203	60.3998	52.3892	59.4613
Anser_cygnoides	79.2875	273.467	120.512	111.276	526.095	128.021	120.471	383.334	70.8309	250.417	535.068	177.996	82.042	65.1439	135.051	85.4828	77.0992	79.087	120.861	109.748	152.653	297.96	398.71	276.831	208.866	66	143.18	219.603	93.729	148.464	166.073	383.503	168.363	185.011	123.071	178.634	446.018	84.3144	390.361	289.623	200.291
Crassostrea_virginica	53.4952	100.553	45.7113	90.2241	92.7178	30.6374	78.3062	117.821	36.9225	75.6657	116.087	35.0795	54.1308	29.8116	56.2715	42.017	37.6094	41.681	40.8428	39.118	35.1505	129.841	82.1078	75.3504	72.2998	46	73.6067	142.549	53.4154	91.4954	42.6014	75.7874	90.1943	45.5824	43.0748	96.4055	150.84	64.4289	123.037	89.9513	53.2022
Monilinia_aucupariae	8.59744	11.277	6.23336	9.02241	9.37596	4.37677	13.7681	9.95674	4.52112	9.00782	10.6747	5.19696	6.76635	6.62481	9.00343	5.79545	3.76094	5.34372	4.16763	0	4.0172	15.7611	102.287	7.37124	7.14072	1	6.04986	10.5949	4.03135	3.45266	9.38674	2.7393	4.50971	3.57509	1.02559	2.83546	13.0034	3.18168	4.47406	5.93086	8.34544
Moniliophthora_roreri	27.7029	85.5173	43.6335	63.1569	62.5064	103.948	83.4692	1.65946	30.8943	26.1227	82.7287	41.5757	27.4883	49.686	66.7755	83.3095	37.6094	47.0247	50.8451	42.3778	46.1977	78.8055	88.3703	36.0372	52.6628	35	63.5236	172.407	34.2665	41.4319	19.4955	51.1337	46.6004	63.4579	36.9213	109.638	87.123	31.8168	64.8738	111.698	57.3749
Sarcoptes_scabiei	22.9265	51.6863	17.6612	34.0847	22.919	35.0142	35.2808	11.6162	12.8099	25.2219	40.03	12.9924	18.6075	11.0413	21.7583	18.8352	11.2828	12.8249	18.3376	13.0393	23.0989	78.8055	52.883	52.4177	43.7369	12	21.1745	82.8326	16.1254	27.6212	17.3294	24.6537	18.0389	19.663	17.4351	38.7512	31.2082	26.2488	54.8072	29.6543	16.6909
Uria_lomvia	726.961	1670.88	792.676	1107.75	1098.03	1563.6	1504.17	1388.96	630.697	1160.21	1606.54	1062.78	1497.9	788.352	1234.22	1219.94	746.546	700.027	1114.42	632.407	1013.34	1116.79	1112.63	920.586	850.639	287	1106.12	2187.36	1360.58	1116.93	778.378	601.734	1020.7	1118.11	1950.68	1732.46	1401.77	959.275	1935.03	2027.36	938.862
Bradyrhizobium_sp._C9	1.91054	2.81925	12.4667	3.00747	13.543	24.0723	8.60507	24.8918	5.27465	25.2219	22.6837	6.4962	6.76635	3.3124	9.00343	19.5596	9.40234	7.48121	12.5029	15.2125	1.0043	5.2537	4.17497	6.55221	24.9925	6	15.1247	2.88951	12.0941	10.358	6.49851	1.8262	7.51619	1.78755	18.4606	2.83546	20.8055	7.95419	15.6592	19.7695	4.17272
Pteropus_alecto	722.185	754.62	708.525	857.129	1019.9	814.08	758.967	972.441	591.514	883.667	1115.5	740.567	751.911	734.249	866.58	717.911	842.45	711.783	792.683	686.738	751.216	1134.05	868.394	1005.76	1140.73	688	743.125	857.221	789.138	930.491	758.882	740.525	862.859	700.718	803.038	949.878	1098.79	800.191	979.818	886.663	753.176
Ambrosiozyma_kashinagacola	13.3738	76.1198	29.089	52.1295	44.7962	40.4851	41.3044	74.6755	23.3591	26.1227	66.7167	23.3863	9.72663	13.2496	48.0183	40.5681	33.8484	55.5747	73.3503	22.8188	47.202	89.3129	68.1912	55.6938	96.3998	31	47.3906	104.022	26.2038	48.3372	34.6587	46.5682	22.5486	35.7509	26.6654	65.2155	81.9216	43.748	74.9404	41.516	35.4681
Aethionema_arabicum	11.4633	15.036	11.4278	8.01992	20.8355	10.9419	13.7681	16.5946	5.27465	10.8094	21.3493	3.89772	15.2243	5.52067	6.00229	15.9375	13.1633	10.6874	5.83468	11.9527	18.0774	22.5159	16.0041	13.9234	7.14072	6	12.0997	21.1897	10.0784	31.0739	11.5529	9.13102	18.0389	4.46886	6.15355	10.3967	27.3072	12.7267	11.1851	9.88476	11.475
Syphacia_muris	13.3738	9.3975	6.23336	12.0299	16.6684	10.9419	12.9076	19.9135	5.27465	9.00782	21.3493	2.59848	8.88084	4.41654	12.7549	9.4176	9.40234	3.20623	5.83468	8.69289	15.0645	12.0085	15.3082	15.5615	9.8185	2	9.07479	24.0792	21.1646	27.6212	10.1088	9.13102	15.0324	8.04396	11.2815	8.50637	16.9045	10.3404	13.4222	12.8502	11.475
Coturnix_japonica	155.709	171.974	145.445	156.388	202.104	181.636	141.984	232.324	140.908	169.347	192.144	114.333	172.542	160.099	138.053	134.744	2595.05	191.305	137.532	186.897	16040.7	171.871	259.544	132.682	157.096	164	168.388	213.824	203.583	177.812	106.864	121.443	186.402	116.19	112.815	148.389	224.959	147.948	176.725	168.041	145.002
Poecilia_reticulata	73.5559	111.83	50.9058	83.2067	119.804	105.043	85.1902	54.7621	51.2394	82.872	88.066	71.4582	57.514	35.3323	72.7777	92.7271	67.6969	48.0935	65.015	54.3305	56.2407	112.579	95.3286	60.6079	61.5888	53	72.5984	168.555	71.5565	100.127	46.9337	88.5709	91.6975	60.7766	37.9469	111.528	127.434	58.861	96.1922	140.364	71.9794
Bradyrhizobium_sp._Ghvi	9.55271	10.3373	0	2.00498	11.4595	8.75355	9.46558	19.9135	8.28873	17.1149	17.3463	6.4962	10.1495	3.3124	4.50172	17.3863	3.76094	7.48121	2.50058	1.08661	0	3.75264	10.4374	13.9234	7.14072	7	13.108	2.88951	2.01568	13.8106	10.8309	3.65241	7.51619	1.78755	8.20473	1.8903	18.2048	0	17.8962	10.8732	2.08636
Meleagris_gallopavo	229.265	219.902	183.884	243.605	330.242	208.991	213.406	290.405	130.359	241.41	332.249	228.666	199.185	161.204	179.318	207.912	250.102	210.543	219.217	230.361	199.855	361.755	363.223	276.012	240.999	191	232.92	301.472	156.215	435.035	188.457	329.63	378.816	196.63	159.992	247.63	401.806	186.128	236.006	384.517	341.12
Procavia_capensis	2094.91	6296.33	2583.73	2523.27	2805.49	2717.98	2393.07	2739.76	1990.8	4140.9	2960.89	2403.59	2284.91	2221.52	2722.04	2731.1	2098.6	2251.84	2971.52	2203.65	2292.81	7249.35	2615.62	2394.83	2433.2	3520	2829.32	3508.83	2277.72	5030.52	1850.63	2071.83	2385.64	2186.17	2233.74	3265.5	6188.33	6935.26	3014.4	3021.77	2179.2
Amyelois_transitella	41.0767	33.831	23.8945	38.0946	30.2114	24.0723	24.0942	48.1242	13.5634	32.4282	37.3613	22.0871	24.9509	13.2496	22.5086	22.4574	20.6852	23.5124	20.8381	14.1259	30.129	48.7843	41.0539	33.5801	20.5296	12	30.2493	71.2746	18.1411	39.7055	13.7191	21.9144	58.6263	25.9194	21.5374	22.6837	54.6144	35.7938	27.9628	51.4008	22.95
Cephalotus_follicularis	59.2268	117.469	47.7891	49.122	109.386	87.5355	64.538	139.394	38.4296	93.6814	105.412	48.0719	65.1262	48.5819	64.5246	65.1988	101.545	66.2621	45.0104	43.4644	59.2536	144.101	93.2411	99.1022	107.111	48	75.6233	164.702	63.4938	77.6848	58.4866	81.266	121.762	45.5824	59.4843	68.9961	163.843	69.2014	142.051	68.2048	64.6772
Thelohanellus_kitauei	12.4185	12.2168	10.3889	9.02241	8.33418	5.47097	7.74457	16.5946	6.78169	4.50391	20.015	9.09468	8.03504	9.93721	10.504	8.69317	18.8047	10.6874	5.00115	7.60627	11.0473	14.26	10.4374	13.1044	11.6037	10	14.1163	47.1953	14.1097	12.0843	2.88823	7.30481	19.5421	10.7253	10.2559	14.1773	10.4027	54.8839	8.94811	14.8271	13.5613
Kitasatospora_aureofaciens	6.6869	2.81925	6.23336	8.01992	7.29241	7.65935	5.16304	11.6162	9.79577	0.900782	10.6747	9.09468	4.65187	8.83308	9.00343	5.07102	16.9242	4.27497	8.33526	7.60627	8.03439	4.50317	9.04578	0	2.67777	7	2.01662	6.74219	11.0862	8.63164	2.88823	10.0441	13.5291	7.15018	2.05118	11.3418	13.0034	5.56793	1.11851	1.97695	11.475
Colinus_virginianus	96.4824	176.673	185.962	159.396	153.141	93.0064	120.471	237.302	94.1901	134.217	158.786	87.0491	103.187	115.934	102.039	88.3805	116.589	138.937	154.202	117.354	109.469	165.867	421.672	166.262	209.759	110	196.621	276.43	83.6506	146.738	84.4807	137.878	84.1813	108.147	104.61	143.663	180.748	102.609	120.8	151.237	90.7567
Caulobacter_sp._AP07	12.4185	9.3975	11.4278	5.01245	20.8355	9.84774	6.88406	3.31891	11.3028	9.00782	13.3433	9.09468	17.3388	3.3124	18.0069	15.9375	9.40234	16.0312	13.3364	8.69289	11.0473	13.5095	5.56663	10.6473	9.8185	6	12.0997	8.66853	14.1097	12.0843	10.1088	8.21791	7.51619	7.15018	29.7422	10.3967	15.6041	14.3175	16.7777	16.8041	11.475
Pygoscelis_adeliae	49.6741	116.529	58.178	75.1867	102.094	78.7819	76.5852	116.162	47.4718	75.6657	134.768	49.3711	55.3995	48.5819	78.0297	79.6874	78.9797	44.8872	81.6855	49.9841	55.2364	136.596	102.983	63.065	83.9035	44	98.8144	157.96	50.3919	91.4954	41.8793	65.7433	78.1684	64.3516	62.5611	143.663	200.253	67.6106	128.629	106.755	61.5476
Colletotrichum_salicis	119.409	12.2168	105.967	4.00996	119.804	141.151	13.7681	94.589	103.986	105.392	101.409	128.625	98.1121	96.0597	92.2852	86.9317	131.633	87.637	90.8543	83.669	2.0086	8.25581	1.39166	0	197.263	79	102.848	2.88951	104.815	141.559	22.3838	2.7393	76.6651	1.78755	102.559	2.83546	102.727	73.1785	102.903	52.3892	1.04318
Leptonychotes_weddellii	1422.4	811.944	1254.98	1114.77	1080.32	1135.77	804.574	1003.97	953.957	1326.85	880.66	1340.82	1460.69	1449.73	1080.41	1138.81	1446.08	1377.61	1116.92	1428.89	990.239	833.837	1965.02	1037.71	1119.31	1377	1043.6	859.147	1380.74	1393.15	917.735	811.747	1312.33	866.066	1302.5	817.557	1154.7	1228.13	871.322	854.043	1004.58
Alfalfa_mosaic_virus	17.1949	17.8553	0	10.0249	6.25064	13.1303	13.7681	31.5297	5.27465	8.10704	16.012	3.89772	7.61215	0	13.5051	9.4176	13.1633	0	0.833526	0	12.0516	24.0169	11.1333	27.0279	0	0	0	26.0056	2.01568	10.358	8.66468	13.6965	10.5227	8.93773	10.2559	11.3418	23.4062	0	11.1851	1.97695	11.475
Amborella_trichopoda	74.5112	301.66	97.656	204.508	252.109	250.57	216.848	252.237	85.9014	176.553	250.855	93.5453	90.0771	78.3935	198.076	147.784	88.382	83.362	101.69	79.3226	120.516	323.478	272.069	300.583	226.718	74	162.338	530.707	84.6584	136.38	148.022	225.536	111.24	115.297	128.199	242.904	250.966	114.54	457.472	207.58	118.923
Diploscapter_pachys	13.3738	14.0963	10.3889	10.0249	15.6266	8.75355	12.9076	9.95674	5.27465	18.0156	14.6777	7.79544	16.493	8.83308	9.00343	7.24431	9.40234	6.41246	15.0035	13.0393	10.043	18.0127	9.7416	11.4664	18.7444	11	8.06648	16.3739	11.0862	17.2633	6.49851	11.8703	12.0259	9.8315	11.2815	13.2321	10.4027	5.56793	12.3037	10.8732	7.30226
Trichechus_manatus	3304.28	2868.12	2929.68	3149.82	3068.02	2733.29	2922.28	3088.25	2363.79	3117.61	3008.92	3244.2	3439.85	3094.89	2894.6	2720.96	3249.45	2929.43	2830.65	2982.75	3058.09	3253.54	3594.65	3296.58	3527.52	3102	2570.18	2607.3	3077.94	3414.68	2812.41	2800.48	3194.38	2795.72	3118.82	2922.41	3285.97	3196.79	2832.08	2958.51	3017.92
Mesorhizobium_sp._L103C131B0	47.7636	30.072	67.5281	36.0896	36.4621	24.0723	36.1413	39.8269	25.6197	27.0235	24.018	38.9772	34.2547	51.8943	53.2703	25.3551	60.175	49.1622	35.8416	34.7715	52.2235	32.2727	20.179	22.1137	36.5962	68	46.3823	25.0424	37.29	31.0739	25.272	31.9586	49.6069	56.3077	64.6123	33.0803	33.8089	33.4076	26.8443	45.4699	63.634
Esox_lucius	117.498	155.059	152.717	157.391	200.02	126.926	171.241	154.329	88.1619	135.117	182.804	106.538	110.799	90.539	93.7858	111.562	99.6648	96.1869	122.528	110.834	87.374	270.19	169.782	170.357	111.574	111	173.429	233.087	93.729	181.264	94.5895	166.185	165.356	119.766	72.817	155.005	219.758	151.13	145.407	191.764	149.175
Arabis_alpina	11.4633	15.036	4.15557	14.0349	20.8355	10.9419	14.6286	28.2108	2.26056	7.20626	21.3493	9.09468	14.3785	6.62481	13.5051	24.6306	20.6852	10.6874	6.66821	10.8661	11.0473	16.5116	23.6582	18.0186	23.2074	14	21.1745	34.6741	12.0941	27.6212	8.66468	11.8703	34.5745	9.8315	10.2559	16.0676	45.512	17.4992	14.5407	6.91933	12.5182
Xiphophorus_maculatus	62.0926	101.493	25.9723	53.132	114.595	48.1445	63.6775	89.6106	34.662	54.0469	108.081	37.6779	46.0958	41.9571	53.2703	44.1903	60.175	60.9184	74.1838	64.11	72.3095	93.816	70.9745	37.6752	53.5554	72	66.5485	91.5011	57.4468	77.6848	32.4926	39.2634	55.6198	57.2015	42.0493	68.9961	143.038	68.406	92.8367	111.698	41.7272
Drosophila_pseudoobscura	13.3738	15.9758	7.27225	9.02241	12.5013	5.47097	12.9076	31.5297	5.27465	26.1227	24.018	1.29924	7.61215	5.52067	9.75372	11.5909	7.52187	6.41246	8.33526	7.60627	5.02149	31.5222	963.723	17.1996	8.03332	13	14.1163	29.8583	6.04703	8.63164	5.77646	12.7834	13.5291	10.7253	7.17914	6.61607	32.5086	15.113	11.1851	11.8617	13.5613
Lotus_japonicus	18.1502	32.8913	23.8945	23.0573	50.0051	17.5071	30.9783	41.4864	15.8239	29.7258	46.7017	15.5909	19.8762	11.0413	27.7606	30.4261	37.6094	39.5435	21.6717	15.2125	11.0473	54.7886	40.3581	36.0372	33.9184	11	26.2161	65.4955	22.1724	20.7159	18.7735	34.6979	51.1101	17.8755	18.4606	34.9706	70.2185	23.8626	20.1333	25.7004	25.0363
Lottia_gigantea	22.9265	22.554	20.7779	31.0772	34.3785	17.5071	23.2337	38.1675	14.3169	21.6188	41.3643	14.2916	28.757	11.0413	21.7583	21.0085	30.0875	24.5811	14.1699	10.8661	14.0602	43.5306	44.533	34.3991	35.7036	24	21.1745	62.606	18.1411	46.6109	14.4411	15.5227	45.0971	24.1319	18.4606	19.8482	49.413	29.4305	24.6073	35.5851	23.9931
Phoebis_sennae	42.9872	64.8428	30.1279	39.0971	46.8798	24.0723	44.7464	64.7188	22.6056	22.5196	54.7077	11.6932	27.9112	20.9786	39.0149	28.2528	24.4461	27.7873	24.1722	35.8582	39.1677	64.5454	38.2706	49.9606	41.9518	17	42.349	110.765	24.1881	24.1686	25.9941	31.0455	61.6328	21.4505	31.7933	48.2028	67.6178	33.4076	30.1999	57.3316	58.4181
Methylobacterium_sp._285MFTsu5.1	12.4185	0	7.27225	2.00498	31.2532	41.5793	9.46558	26.5513	16.5775	27.9243	34.6927	7.79544	9.30374	2.20827	6.75257	21.0085	13.1633	7.48121	10.8358	8.69289	0	5.2537	5.56663	4.91416	10.7111	6	15.1247	0.96317	7.05487	22.4423	5.0544	4.56551	21.0453	0	14.3583	0	28.6075	6.36335	12.3037	18.781	1.04318
Manis_pentadactyla	4005.45	4429.98	3773.26	4147.3	5078.64	5137.24	4512.5	4485.51	3882.89	4653.44	4333.91	4724.04	4727.99	3900.91	4351.66	4752.99	3947.1	4076.19	3835.05	3793.36	4050.34	4665.28	4561.16	4047.63	4220.17	4369	4276.24	4898.68	4718.7	4402.14	4320.07	3688.93	3878.35	3883.44	4788.49	4316.51	4148.09	4838.53	5353.21	5251.77	3875.42
Plutella_xylostella	37.2556	46.0478	20.7779	24.0598	56.2557	82.0645	51.6304	51.4431	23.3591	76.5665	56.042	61.0643	65.1262	17.6662	33.0126	65.9232	37.6094	12.8249	19.1711	24.992	33.1419	75.0528	57.058	60.6079	47.3073	21	45.374	100.17	15.1176	37.9792	28.1602	33.7848	67.6457	20.5568	63.5867	28.3546	61.1161	42.9526	55.9257	57.3316	26.0795
Austropuccinia_psidii	12.4185	17.8553	14.5445	13.0324	14.5848	4.37677	12.0471	19.9135	5.27465	7.20626	22.6837	2.59848	10.9953	5.52067	12.7549	10.142	15.0437	7.48121	15.0035	5.43305	9.03869	21.0148	25.0498	18.8376	9.8185	8	16.133	28.8951	11.0862	10.358	9.38674	13.6965	18.0389	7.15018	3.07677	15.1224	24.7065	11.1359	8.94811	15.8156	10.4318
Blumeria_graminis	2.86581	1.8795	3.11668	6.01494	5.20887	2.18839	3.44203	1.65946	2.26056	8.10704	6.67167	2.59848	3.38318	13.2496	52.52	4.34658	3.76094	4.27497	2.50058	2.17322	12.0516	6.00423	11.8291	25.3898	5.35554	2	6.04986	18.3002	3.02352	5.17898	0.722057	0	3.00648	0	4.10237	2.83546	1.30034	4.77251	3.35554	7.90781	1.04318
Cronobacter_sakazakii	11.4633	6.57825	27.0112	10.0249	13.543	10.9419	6.88406	18.254	6.78169	10.8094	9.34033	5.19696	5.07477	8.83308	384.146	10.8665	535.934	5.34372	9.16878	1.08661	9.03869	6.00423	8.34995	9.00929	44.6295	6	16.133	120.396	11.0862	5.17898	5.77646	5.47861	3.00648	37.5385	4.10237	4.72576	19.5051	108.177	6.71108	12.8502	4.17272
Microplitis_demolitor	23.8818	24.4335	14.5445	32.0797	26.0443	12.0361	19.7917	29.8702	7.53521	15.3133	18.6807	15.5909	16.0701	3.3124	18.0069	13.7642	16.9242	21.3749	8.33526	11.9527	8.03439	38.2769	32.0081	21.2947	25.8851	7	12.0997	110.765	8.06271	27.6212	10.1088	18.262	39.0842	17.8755	17.4351	22.6837	42.9113	17.4992	16.7777	19.7695	15.6477
Paxillus_involutus	1.91054	19.7348	6.23336	16.0398	21.8772	13.1303	12.9076	13.2756	4.52112	4.50391	9.34033	9.09468	7.61215	2.20827	6.00229	5.07102	0	8.54995	3.3341	10.8661	6.02579	17.2622	6.95829	6.55221	27.6703	2	10.0831	19.2634	9.07055	5.17898	7.94263	10.9572	1.50324	2.68132	9.23032	10.3967	16.9045	1.59084	23.4888	7.90781	3.12954
Anopheles_quadriannulatus	21.016	18.795	12.4667	17.0423	18.7519	9.84774	14.6286	18.254	13.5634	17.1149	14.6777	10.3939	22.8364	13.2496	16.5063	10.142	26.3266	16.0312	13.3364	18.4724	16.0688	23.2664	29.2248	21.2947	16.9592	17	17.1413	18.3002	26.2038	18.9896	15.8853	20.0882	21.0453	7.15018	17.4351	11.3418	41.611	25.4534	7.8296	18.781	8.34544
Ipomoea_trifida	21.016	26.313	9.35004	18.0448	42.7127	8.75355	10.3261	11.6162	9.04225	33.3289	28.021	5.19696	17.3388	11.0413	16.5063	12.3153	26.3266	14.9624	12.5029	10.8661	18.0774	40.5285	45.2289	31.942	20.5296	8	21.1745	42.3795	12.0941	22.4423	14.4411	20.0882	36.0777	23.2381	10.2559	21.7385	48.1127	21.4763	23.4888	17.7926	16.6909
Cavia_aperea	782.367	730.186	662.814	763.897	755.285	725.45	692.708	813.134	791.197	832.323	801.934	901.672	785.32	836.934	709.771	750.51	772.873	674.377	660.986	726.943	755.233	728.763	750.104	801.008	702.469	785	691.701	741.641	726.652	802.742	853.471	785.267	853.839	684.63	772.27	678.619	765.902	804.964	756.115	641.521	813.681
Bacillus_anthracis	330.524	928.473	628.531	526.307	645.899	454.09	573.958	660.464	345.866	154.935	704.528	263.746	228.787	701.125	733.78	439.005	308.397	1024.93	1047.74	800.832	521.231	366.258	407.06	267.822	756.024	695	1011.34	884.19	522.06	533.435	233.224	409.07	243.525	433.48	262.551	732.493	693.083	314.986	902.641	562.443	486.122
Cladosporium_sphaerospermum	18.1502	20.6745	38.4391	16.0398	29.1696	26.2606	13.7681	23.2324	14.3169	16.2141	33.3583	9.09468	8.03504	35.3323	22.5086	20.2841	28.207	2.13749	27.5064	23.9054	8.03439	24.7674	18.7874	145.787	31.2407	22	29.241	36.6005	3.02352	37.9792	10.8309	28.3062	15.0324	10.7253	3.07677	18.903	26.0069	39.7709	36.911	752.23	17.7341
Corynebacterium_aurimucosum	8.59744	9.3975	11.4278	12.0299	29.1696	17.5071	11.1866	16.5946	9.79577	6.30548	13.3433	5.19696	1.26869	5.52067	7.50286	18.1108	1.88047	33.1311	17.504	16.2992	10.043	13.5095	11.1333	20.4757	116.037	15	19.1579	4.81585	27.2116	18.9896	15.8853	5.47861	4.50971	12.5128	5.12796	8.50637	16.9045	34.9984	8.94811	145.306	9.38862
Heliconius_hierax	19.1054	26.313	16.6223	25.0622	23.9608	17.5071	15.4891	33.1891	15.8239	18.9164	29.3553	19.4886	18.1846	11.0413	21.7583	16.6619	16.9242	21.3749	22.5052	20.6456	10.043	39.778	25.0498	22.9327	23.2074	21	24.1995	46.2322	24.1881	20.7159	18.0514	20.0882	22.5486	26.8132	19.4862	20.7934	54.6144	27.0442	24.6073	41.516	23.9931
Entodinium_caudatum	10.508	12.2168	5.19447	13.0324	17.7101	9.84774	12.0471	11.6162	8.28873	8.10704	16.012	3.89772	10.1495	5.52067	9.00343	5.79545	5.64141	10.6874	5.00115	6.51966	7.03009	18.7632	7.65412	18.0186	8.03332	1	10.0831	16.3739	5.03919	10.358	5.0544	9.13102	19.5421	4.46886	4.10237	6.61607	27.3072	11.1359	11.1851	11.8617	6.25908
Comamonas_testosteroni	31.524	21.6143	14.5445	15.0373	56.2557	48.1445	44.7464	63.0593	20.3451	70.261	60.045	32.481	15.2243	2.20827	26.26	41.2926	26.3266	17.0999	24.1722	13.0393	14.0602	29.2706	31.3123	47.5035	53.5554	17	23.1911	26.9688	17.1333	31.0739	29.6043	20.0882	28.5615	15.1941	37.9469	15.1224	87.123	11.9313	49.2146	61.2855	20.8636
Methylobacterium_populi	79.2875	36.6503	71.6836	9.02241	148.974	182.73	54.212	182.54	73.845	166.645	150.78	88.3483	56.6682	35.3323	61.5235	129.673	62.0555	74.8121	99.1896	57.5904	8.03439	42.0296	28.529	49.1416	162.451	69	91.7563	19.2634	59.4625	105.306	62.819	17.3489	84.1813	14.3004	117.943	7.56122	184.649	81.1327	137.577	136.41	12.5182
Nippostrongylus_brasiliensis	34.3898	45.108	17.6612	29.0722	44.7962	42.6735	20.6522	29.8702	12.8099	20.718	33.3583	24.6856	24.528	14.3537	26.26	35.4971	16.9242	12.8249	25.8393	19.559	27.1161	48.0338	135.687	40.1323	18.7444	8	25.2078	70.3114	27.2116	36.2529	17.3294	34.6979	30.0648	23.2381	18.4606	38.7512	48.1127	22.2717	39.148	45.4699	30.2522
Apis_florea	17.1949	24.4335	14.5445	16.0398	27.0861	15.3187	24.0942	16.5946	4.52112	33.3289	24.018	9.09468	11.8411	8.83308	18.0069	9.4176	15.0437	13.8937	13.3364	13.0393	7.03009	36.0254	68.8871	24.5708	23.2074	8	18.1496	38.5268	17.1333	18.9896	15.1632	25.5668	21.0453	5.36264	13.3327	24.574	42.9113	12.7267	21.2518	31.6312	13.5613
Jatropha_curcas	21.9712	23.4938	62.3336	25.0622	50.0051	16.4129	21.5127	43.1459	15.0704	270.235	33.3583	24.6856	26.6425	13.2496	33.0126	15.213	18.8047	11.7562	11.6694	16.2992	18.0774	306.216	240.061	57.3318	38.3814	13	23.1911	46.2322	19.1489	39.7055	15.8853	60.2647	48.1036	8.93773	14.3583	28.3546	362.796	46.9297	24.6073	19.7695	40.684
Gavialis_gangeticus	192.01	322.334	280.501	301.749	482.341	231.969	321.83	336.87	151.458	335.992	425.652	241.659	184.383	236.285	342.881	225.298	255.744	225.505	306.737	189.07	272.165	594.418	496.126	351.362	405.236	272	307.535	417.053	237.85	296.928	130.692	286.714	290.125	293.157	205.118	424.373	633.267	232.262	399.309	435.918	335.904
Modiolus_philippinarum	177.68	189.83	121.551	205.51	233.357	102.854	161.775	265.513	96.4507	137.82	288.216	87.0491	146.322	88.3308	138.803	120.255	278.309	123.974	121.695	107.574	155.666	276.194	265.111	234.242	151.74	131	201.662	330.367	127.995	208.886	122.028	200.882	264.57	147.473	107.687	200.372	335.488	172.606	162.185	203.626	171.082
Xiphophorus_hellerii	16.2396	38.5298	21.8168	11.0274	27.0861	20.7897	24.9547	31.5297	11.3028	40.5352	29.3553	18.1894	17.7617	15.4579	18.7572	23.9062	30.0875	19.2374	10.0023	16.2992	13.0559	45.0317	2418.01	31.942	30.3481	11	27.2244	29.8583	17.1333	41.4319	7.94263	27.393	30.0648	8.04396	12.3071	15.1224	48.1127	29.4305	23.4888	51.4008	27.1227
Oncorhynchus_kisutch	173.859	144.722	132.978	136.339	279.195	157.564	105.842	172.583	128.099	199.974	184.138	183.193	142.093	82.8101	145.555	136.917	110.948	83.362	125.862	84.7556	119.512	296.459	831.515	137.596	197.263	133	160.321	244.645	87.682	317.644	99.6439	184.447	275.093	143.897	186.658	177.689	299.079	155.902	130.866	160.133	286.875
Seriola_dumerili	43.9425	98.6738	45.7113	82.2042	87.5089	76.5935	98.0978	94.589	33.9084	107.193	98.7407	53.2688	53.7079	37.5406	68.276	59.4033	63.9359	59.8496	41.6763	39.118	47.202	111.078	126.641	105.654	83.0109	40	59.4903	153.144	62.486	70.7794	58.4866	80.3529	94.704	46.4762	67.689	87.8992	133.935	66.8152	121.918	120.594	68.8499
Cricetulus_griseus	4930.16	4826.56	4986.69	5189.89	4735.9	3935.81	4534.01	4586.74	4173.75	4570.57	4826.28	4737.03	4969.04	4749.99	4715.55	4332.82	5212.66	4420.32	4565.22	4527.91	4819.63	4497.92	4143.66	4765.09	4665.57	4654	4429.51	4881.34	4604.81	5287.74	4394.44	4410.28	4832.91	4602.04	4851.05	5345.78	5487.45	4537.07	4613.87	4217.83	4540.96
Bactrocera_oleae	56.361	95.8545	50.9058	81.2017	97.9267	72.2168	103.261	106.205	34.662	48.6422	116.087	49.3711	39.7523	46.3736	66.0252	68.0965	65.8164	61.9871	75.0173	49.9841	54.2321	107.326	107.158	65.5221	63.3739	41	86.7147	156.997	64.5017	94.948	38.269	35.611	90.1943	60.7766	45.126	108.693	162.543	62.0427	115.207	116.64	42.7704
Xenopus_laevis	4756.3	3066.41	5127.98	3176.89	2685.69	3005.75	2606.48	2932.26	5664.97	4293.13	2240.35	4561.63	5151.73	4449.66	3216.48	3261.39	4701.17	4206.58	3350.77	4674.6	3221.79	2011.42	2664.33	3552.12	2914.31	3996	4104.83	2058.29	4691.49	4250.22	4977.86	3821.33	4751.74	3595.65	4143.39	2291.99	2992.09	4035.95	1744.88	1994.74	3712.68
Streptococcus_mitis	10.508	15.9758	4.15557	7.01743	18.7519	15.3187	13.7681	24.8918	7.53521	9.9086	5.33733	5.19696	5.49766	3.3124	6.00229	10.142	5.64141	5.34372	4.16763	5.43305	10.043	13.5095	20.8749	25.3898	17.8518	5	6.04986	15.4107	25.196	3.45266	13.7191	7.30481	7.51619	15.1941	6.15355	12.287	13.0034	19.8855	6.71108	98.8476	15.6477
Hymenolepis_diminuta	13.3738	25.3733	15.5834	19.0473	295.864	9.84774	16.3496	36.508	11.3028	22.5196	25.3523	15.5909	9.72663	16.562	17.2566	17.3863	20.6852	13.8937	18.3376	3.25983	22.0946	32.2727	29.9206	13.9234	17.8518	13	25.2078	38.5268	15.1176	24.1686	14.4411	20.0882	27.0583	15.1941	12.3071	19.8482	39.0103	13.5221	15.6592	20.758	10.4318
Manacus_vitellinus	329.569	637.151	319.979	334.832	720.907	596.335	398.415	658.804	234.345	402.65	639.146	297.526	256.276	229.66	450.922	526.661	235.059	363.373	332.577	311.857	410.758	723.509	942.848	358.734	397.203	300	431.557	825.437	348.712	531.709	327.814	453.812	276.596	296.733	308.703	550.079	815.315	566.338	614.064	747.288	350.509
Mus_musculus	1486.4	1207.58	1231.09	1348.35	1291.8	1123.74	1114.36	1013.93	1507.04	1443.95	960.72	1650.03	1591.36	1337.11	1127.68	1233.71	1496.85	1433.19	1171.1	1316.97	1314.63	1047.74	981.119	1282.6	1478.13	1789	1021.42	1018.07	1444.23	1415.59	1335.81	1233.6	4171.49	1183.36	1555.82	1017.93	1222.32	1189.15	938.433	769.034	1298.76
Ptychodera_flava	116.543	210.504	94.5393	69.1718	195.853	146.622	205.661	175.902	84.3943	92.7806	236.177	80.5529	97.2663	101.58	153.809	142.713	118.47	58.7809	49.178	94.5351	114.49	183.879	186.482	83.5407	149.063	105	176.454	328.441	66.5173	176.085	88.813	131.487	148.821	103.678	92.3032	69.9413	288.676	123.29	186.792	278.75	116.836
Amycolatopsis_alba	162.396	262.19	89.3448	9.02241	491.717	221.027	293.433	290.405	130.359	159.438	262.864	115.632	151.397	107.101	245.344	233.991	112.828	225.505	19.1711	149.952	182.782	266.438	268.59	212.128	190.122	139	187.546	330.367	194.513	196.801	189.901	195.404	103.723	161.773	195.888	17.0127	243.164	151.13	411.613	259.969	153.348
Amycolatopsis_vancoresmycina	42.0319	43.2285	32.2057	38.0946	59.3811	30.6374	37.0018	31.5297	15.0704	43.2375	37.3613	28.5833	63.4346	33.124	49.5189	46.3636	65.8164	44.8872	44.1769	48.8975	30.129	57.0402	13.2207	53.2367	57.1258	33	48.3989	30.8214	49.3841	58.6951	29.6043	18.262	28.5615	32.1758	77.945	41.5867	44.2117	34.9984	63.7553	34.5967	30.2522
Bemisia_tabaci	38.2109	55.4453	61.2947	43.1071	56.2557	56.898	37.8623	68.0377	21.0986	53.1462	65.3823	19.4886	39.3294	34.2282	33.0126	55.0567	54.5336	47.0247	20.0046	40.2046	44.1891	75.0528	72.3662	48.3226	43.7369	33	60.4986	87.6485	42.3292	74.2321	33.2146	54.7861	43.5939	40.2198	25.6398	41.5867	84.5223	68.406	58.1627	58.3201	56.3317
Methylobacterium_sp._B1	416.498	69.5415	173.495	37.0921	756.327	907.086	260.734	1178.21	744.478	799.895	853.973	354.692	296.451	118.142	265.601	707.044	259.505	218.024	196.712	204.283	41.1763	42.7801	169.782	233.422	359.714	169	247.036	26.9688	219.709	495.456	370.415	91.3102	381.822	58.989	450.235	30.2449	1167.71	136.812	666.634	310.381	57.3749
Notothenia_coriiceps	70.6901	91.1558	43.6335	73.1818	93.7596	65.6516	70.5616	142.713	37.676	87.3759	114.753	36.3787	55.3995	41.9571	50.2692	65.1988	56.4141	65.1934	60.0139	49.9841	53.2278	99.0697	100.895	63.065	68.7295	38	75.6233	199.376	47.3684	51.7898	64.2631	52.9599	94.704	45.5824	49.2284	88.8443	154.741	71.5877	97.3107	82.0435	38.5977
Pristionchus_pacificus	9.55271	28.1925	16.6223	17.0423	27.0861	12.0361	20.6522	23.2324	7.53521	27.9243	40.03	10.3939	19.0304	20.9786	29.2612	13.0398	20.6852	13.8937	16.6705	21.7322	14.0602	19.5137	63.3204	29.4849	24.0999	3	15.1247	56.827	11.0862	8.63164	7.22057	21.0013	18.0389	16.0879	17.4351	56.7091	41.611	8.74961	29.0814	41.516	12.5182
Bradyrhizobium_manausense	23.8818	11.277	1.03889	16.0398	26.0443	19.6955	14.6286	56.4215	15.0704	38.7336	50.7047	6.4962	16.0701	6.62481	11.2543	32.5994	9.40234	6.41246	5.83468	7.60627	2.0086	15.7611	16.6999	40.9513	5.35554	7	26.2161	0.96317	4.03135	27.6212	25.272	10.0441	21.0453	5.36264	17.4351	0.945152	24.7065	3.18168	23.4888	31.6312	10.4318
Leucosporidium_creatinivorum	20.0607	17.8553	6.23336	21.0523	18.7519	18.6013	10.3261	9.95674	24.1127	22.5196	8.006	20.7878	26.2196	12.1455	15.756	13.7642	24.4461	37.406	16.6705	19.559	15.0645	7.50528	9.7416	18.8376	4.46295	7	12.0997	19.2634	17.1333	18.9896	15.8853	19.1751	18.0389	14.3004	27.691	10.3967	16.9045	19.8855	16.7777	7.90781	9.38862
Pseudomonas_putida	6.6869	7.518	5.19447	6.01494	12.5013	12.0361	10.3261	16.5946	3.01408	13.5117	17.3463	7.79544	8.88084	3.3124	8.25315	7.96874	7.52187	7.48121	7.50173	4.34644	4.0172	5.2537	9.04578	14.7425	9.8185	5	2.01662	20.2266	4.03135	20.7159	4.33234	4.56551	19.5421	2.68132	8.20473	2.83546	13.0034	15.9084	8.94811	573.316	2.08636
Tribolium_castaneum	116.543	174.794	115.317	155.386	191.686	141.151	197.056	147.692	48.9788	93.6814	120.09	67.5605	115.874	120.351	165.813	91.2783	67.6969	20.3061	168.372	114.094	158.679	191.385	85.587	145.787	212.437	140	160.321	246.571	14.1097	107.032	57.0425	71.2219	94.704	148.366	87.1753	142.718	140.437	185.333	194.621	286.658	115.793
Numida_meleagris	96.4824	124.987	115.317	108.269	271.903	124.738	80.0272	104.546	131.866	80.1696	213.493	50.6703	58.7827	113.726	154.559	112.287	109.067	100.462	93.3549	111.921	79.3396	200.391	333.302	149.882	116.037	113	135.114	175.297	78.6114	139.833	44.7675	94.9626	180.389	59.8828	67.689	95.4604	191.15	116.131	167.777	183.857	127.268
Wuchereria_bancrofti	21.9712	39.4695	19.739	33.0822	32.295	32.8258	35.2808	53.1026	15.0704	36.9321	61.3793	12.9924	34.2547	15.4579	20.2577	28.2528	9.40234	23.5124	34.1746	32.5983	25.1075	40.5285	936.586	35.2181	43.7369	21	34.2826	71.2746	21.1646	24.1686	17.3294	25.5668	22.5486	16.9817	21.5374	34.0255	57.2151	23.0671	25.7258	51.4008	31.2954
Polysphondylium_violaceum	11.4633	13.1565	10.3889	13.0324	30.2114	10.9419	13.7681	13.2756	6.78169	14.4125	20.015	7.79544	13.5327	4.41654	8.25315	16.6619	9.40234	11.7562	14.1699	5.43305	6.02579	16.5116	21.5707	13.1044	16.0666	7	13.108	29.8583	9.07055	12.0843	7.22057	8.21791	7.51619	11.619	9.23032	15.1224	18.2048	15.9084	20.1333	26.6889	7.30226
Boechera_stricta	8.59744	7.518	14.5445	9.02241	12.5013	9.84774	2.58152	14.9351	7.53521	10.8094	17.3463	10.3939	8.03504	6.62481	8.25315	10.142	13.1633	14.9624	9.16878	10.8661	3.0129	15.0106	13.9166	8.19026	7.14072	4	11.0914	46.2322	10.0784	12.0843	5.0544	14.6096	25.555	3.57509	6.15355	13.2321	18.2048	11.1359	8.94811	22.7349	7.30226
Felis_catus	953.361	1325.05	996.299	1060.63	1702.26	1244.1	1200.41	1518.4	825.105	1108.86	1507.8	962.737	1149.86	863.433	1319.75	1322.09	977.844	1208.75	1101.92	1017.07	1064.56	1441.76	1521.78	1237.55	1190.72	899	1441.88	1570.93	1070.32	1419.04	940.84	1086.59	1010.18	945.612	1239.94	1247.6	1594.22	1309.26	1684.48	1679.42	1227.82
Botryllus_schlosseri	49.6741	85.5173	76.8781	65.1618	86.4672	77.6877	67.1196	79.6539	55.7605	45.0391	101.409	24.6856	41.8668	45.2695	54.0206	63.0255	54.5336	58.7809	24.1722	43.4644	50.2149	71.3002	15955.4	27.8469	40.1666	45	76.6316	147.365	36.2822	65.6005	36.1029	59.3516	48.1036	68.8205	30.7677	34.0255	163.843	65.2243	70.4664	108.732	41.7272
Helobdella_robusta	34.3898	43.2285	28.0501	41.1021	38.5456	24.0723	22.3732	41.4864	18.0845	33.3289	34.6927	25.9848	24.528	19.8744	29.2612	23.9062	24.4461	19.2374	15.0035	26.0787	30.129	35.2748	43.8372	29.4849	32.1333	19	36.2992	54.9007	32.2508	27.6212	18.7735	27.393	45.0971	25.9194	24.6142	27.4094	57.2151	29.4305	23.4888	26.6889	25.0363
Rhipicephalus_microplus	80.2428	115.589	48.828	104.259	102.094	85.3471	79.1667	97.9079	47.4718	84.6735	89.4003	50.6703	51.1705	50.7902	54.7709	51.4346	48.8922	53.4372	49.178	58.677	76.3267	179.376	125.249	111.388	78.548	49	77.6399	1407.19	56.439	98.4007	48.3778	73.9612	105.227	69.7143	48.2028	91.6798	159.942	88.2915	96.1922	91.9283	101.188
Kluyveromyces_dobzhanskii	6.6869	79.8788	17.6612	35.0871	86.4672	28.449	38.7228	86.2917	6.78169	55.8485	68.051	24.6856	12.6869	13.2496	35.2634	20.2841	1.88047	4.27497	26.6728	15.2125	15.0645	66.797	27.1373	31.942	66.9443	7	22.1828	61.6429	16.1254	29.3476	21.6617	29.2193	9.01943	16.9817	49.2284	48.2028	119.632	8.74961	81.6515	34.5967	10.4318
Cryptosporidium_baileyi	0	39.4695	112.2	0	77.0912	0	124.774	3.31891	85.9014	0.900782	1.33433	48.0719	1.69159	1.10413	0.750286	1.44886	5.64141	225.505	7.50173	1.08661	122.524	46.5328	1.39166	51.5987	1.78518	3	98.8144	6.74219	127.995	0	529.268	1.8262	25.555	2.68132	1.02559	0.945152	42.9113	0.795419	1.11851	0.988476	1.04318
Eimeria_acervulina	10.508	2.81925	3.11668	5.01245	4.16709	83.1587	0.860507	3.31891	0.753521	61.2532	2.66867	68.8597	4.65187	4.41654	4.50172	77.5141	5.64141	3.20623	5.83468	0	3.0129	7.50528	5.56663	5.73318	4.46295	6	3.02493	22.1529	3.02352	0	2.88823	5.47861	1.50324	5.36264	3.07677	2.83546	11.7031	6.36335	6.71108	0.988476	6.25908
Odobenus_rosmarus	3830.64	3306.98	3944.68	3571.87	3557.66	3139.24	2954.98	3116.46	3460.17	3789.59	3019.6	4138.08	4217.98	3984.82	3383.04	3169.38	4155.84	4143.52	3473.3	4053.06	3431.69	3195	3008.76	3492.33	3907.76	3903	3659.16	2820.16	3929.56	3903.23	3473.82	3236.03	3843.78	3285.51	3908.53	3197.45	3337.98	3715.4	3044.59	2825.06	3586.45
Cutibacterium_granulosum	21.9712	31.9515	39.478	8.01992	65.6317	32.8258	27.5362	63.0593	18.838	23.4203	12.009	7.79544	3.38318	23.1868	10.504	41.2926	24.4461	101.531	48.3445	38.0314	6.02579	26.2685	11.1333	43.4084	141.029	65	88.7313	18.3002	53.4154	29.3476	15.8853	14.6096	19.5421	4.46886	12.3071	8.50637	39.0103	27.8397	15.6592	191.764	15.6477
Delftia_acidovorans	460.441	102.433	697.097	32.0797	1474.11	1572.36	219.429	2699.94	293.12	1440.35	1872.07	740.567	481.257	405.217	543.957	1493.05	609.272	791.939	892.706	722.596	29.1247	114.08	77.237	143.33	1787.86	667	870.172	59.7165	471.668	1198.07	265.717	52.9599	941.027	54.5201	846.113	27.4094	2522.66	572.702	1171.08	1127.85	45.8999
Nocardia_brevicatena	95.5271	193.589	52.9836	24.0598	267.736	893.956	194.475	200.794	491.296	19.8172	246.852	376.779	504.093	879.995	798.304	631.704	116.589	33.1311	7.50173	570.471	165.709	748.277	657.558	352.181	1081.82	40	86.7147	1302.21	179.395	174.359	15.1632	390.808	339.732	159.985	603.048	3.78061	295.178	190.105	435.102	44.4814	504.899
3300006104_____Ga0007882_10001975	430.827	1399.29	542.302	946.35	1019.9	709.037	598.913	990.695	265.993	2669.92	845.967	591.154	363.269	140.225	567.216	555.638	306.516	537.578	321.741	266.22	465.995	3397.64	1511.34	987.746	831.894	195	429.54	1389.85	334.602	538.614	631.078	607.213	327.706	615.809	621.509	750.451	1778.87	641.903	1508.88	847.124	340.077
Diaphorina_citri	614.239	1324.11	682.553	735.828	1235.54	904.898	804.574	932.614	383.542	620.639	943.374	574.264	673.675	810.435	1108.17	614.317	550.977	818.658	754.341	904.06	748.203	880.37	582.409	663.411	755.132	808	942.77	1856.03	775.028	975.375	353.808	440.115	632.863	703.399	997.901	987.684	1102.69	1179.61	1260.57	1401.66	791.774
Asparagus_officinalis	48.7188	82.698	63.3725	57.1419	97.9267	55.8039	60.2355	92.9295	30.8943	90.979	132.099	41.5757	53.7079	22.0827	57.0217	60.1277	63.9359	53.4372	48.3445	30.4251	54.2321	150.106	73.7579	94.188	55.3406	41	66.5485	118.47	57.4468	53.5162	47.6558	47.4813	79.6716	44.6886	59.4843	57.6543	156.041	58.861	117.444	63.2625	67.8067
Drosophila_willistoni	34.3898	31.9515	37.4002	25.0622	45.838	30.6374	29.2572	31.5297	23.3591	54.9477	52.039	46.7726	69.3551	27.6034	31.512	15.213	48.8922	34.1998	21.6717	36.9448	27.1161	57.7907	140.557	40.1323	30.3481	32	35.2909	216.713	54.4233	56.9688	14.4411	31.0455	52.6133	21.4505	52.3052	37.8061	66.3175	44.5435	25.7258	39.539	36.5113
Melopsittacus_undulatus	82.1533	197.348	124.667	96.239	182.31	98.4774	81.7482	132.756	274.282	144.125	136.102	72.7574	88.8084	93.8514	99.0378	84.7584	99.6648	89.7745	95.0219	84.7556	82.3525	293.457	1965.72	118.759	126.748	104	141.163	180.113	88.6898	198.528	55.5984	115.964	320.19	67.9267	96.4056	106.802	239.263	159.879	117.444	133.444	117.879
Methylobacterium_indicum	6.6869	3.759	4.15557	0	9.37596	9.84774	5.16304	11.6162	17.331	9.9086	13.3433	7.79544	3.80607	3.3124	3.00114	16.6619	0	9.61869	2.50058	0	1.0043	3.00211	3.47914	8.19026	18.7444	5	7.05817	0	10.0784	8.63164	12.275	2.7393	1.50324	0.893773	5.12796	0	7.80206	6.36335	3.35554	6.91933	2.08636
Labrus_bergylta	106.99	187.95	93.5004	143.356	181.269	145.528	104.982	224.027	86.6549	91.8798	208.156	79.2536	108.685	107.101	132.05	109.389	97.7844	87.637	77.5179	114.094	122.524	168.118	168.391	138.415	107.111	119	110.914	238.866	92.7211	155.37	57.0425	111.398	133.788	110.828	85.1241	108.693	202.853	213.172	175.607	185.833	143.959
Auxenochlorella_protothecoides	22.9265	10.3373	27.0112	2.00498	33.3367	12.0361	12.9076	29.8702	0.753521	40.5352	26.6867	61.0643	17.3388	36.4364	27.7606	17.3863	11.2828	0	0.833526	23.9054	3.0129	13.5095	10.4374	17.1996	15.174	41	26.2161	11.558	6.04703	31.0739	23.8279	11.8703	1.50324	6.25641	30.7677	3.78061	59.8158	38.1801	13.4222	16.8041	20.8636
Isoperla_grammatica	42.0319	62.9633	41.5557	58.1444	60.4228	36.1084	66.2591	66.3782	27.8803	59.4516	98.7407	22.0871	49.0561	26.4992	54.7709	44.9147	43.2508	35.2685	30.0069	30.4251	46.1977	116.332	123.858	72.0743	50.8777	28	50.4155	172.407	32.2508	75.9584	33.9367	50.2206	76.6651	45.5824	31.7933	44.4222	122.232	41.3618	63.7553	58.3201	62.5908
Cariama_cristata	121.319	176.673	196.351	100.249	217.731	196.955	144.565	245.6	112.275	143.224	206.822	94.8445	111.645	102.685	144.055	165.895	95.9039	173.136	203.38	151.039	145.623	238.668	226.144	128.587	167.807	119	263.169	288.951	142.105	132.927	103.254	173.489	168.363	120.659	86.1497	189.03	283.475	172.606	200.214	223.396	136.657
Anopheles_funestus	49.6741	68.6018	40.5168	44.1096	29.1696	31.7316	55.933	33.1891	40.6901	30.6266	37.3613	18.1894	20.722	19.8744	34.5132	21.7329	24.4461	30.9936	26.6728	30.4251	36.1548	72.0507	58.4496	22.1137	21.4222	29	54.4488	83.7958	20.1568	41.4319	24.5499	44.742	39.0842	31.282	22.563	66.1607	81.9216	41.3618	40.2665	65.2394	39.6409
Ralstonia_pickettii	4.77636	4.69875	13.5056	0	38.5456	31.7316	12.0471	26.5513	10.5493	26.1227	33.3583	20.7878	6.34346	5.52067	13.5051	29.7017	13.1633	10.6874	15.0035	10.8661	10.043	7.50528	4.8708	10.6473	39.274	15	23.1911	2.88951	4.03135	24.1686	12.275	0.913102	21.0453	0.893773	21.5374	2.83546	35.1093	11.1359	22.3703	20.758	4.17272
Bubalus_bubalis	3126.6	2201.84	2895.4	2480.16	3289.92	2396.28	1730.48	2012.92	2077.46	2723.97	2038.86	2521.82	2476.49	2303.22	2473.69	2781.09	2858.31	3836.79	2560.59	3761.85	2197.41	3862.97	3362.94	2858.4	2464.44	2414	3028.96	2675.69	2076.15	3692.62	1872.29	2921.93	3010.99	2656.29	2561.93	2171.96	2777.53	2904.87	2745.95	2850.76	2409.75
Monilinia_fructicola	17.1949	28.1925	9.35004	23.0573	25.0026	47.0503	18.9312	43.1459	20.3451	41.436	32.024	16.8901	18.6075	12.1455	27.7606	38.3948	22.5656	25.6498	24.1722	19.559	16.0688	35.2748	39.6622	38.4942	43.7369	19	24.1995	32.7478	17.1333	24.1686	19.4955	21.9144	15.0324	16.9817	29.7422	25.5191	35.1093	23.0671	34.6739	18.781	31.2954
Pseudomonas_syringae_pv._coryli	13.3738	8.45775	6.23336	6.01494	5.20887	12.0361	8.60507	4.97837	3.7676	7.20626	5.33733	6.4962	10.5724	14.3537	11.2543	3.62215	3.76094	3.20623	4.16763	6.51966	10.043	13.5095	3.47914	4.91416	11.6037	7	6.04986	30.8214	10.0784	10.358	2.16617	2.7393	9.01943	8.04396	13.3327	7.56122	3.90103	7.95419	4.47406	2.96543	11.475
Crithidia_fasciculata	21.016	13.1565	18.7001	28.0697	22.919	19.6955	19.7917	14.9351	30.1408	13.5117	12.009	7.79544	15.6472	15.4579	21.7583	13.0398	30.0875	14.9624	16.6705	13.0393	15.0645	18.0127	25.0498	19.6566	16.0666	17	5.04155	27.9319	22.1724	12.0843	8.66468	20.0882	33.0712	21.4505	15.3839	16.0676	19.5051	11.1359	14.5407	9.88476	30.2522
Micrococcus_luteus	7.64217	1.8795	2.07779	7.01743	14.5848	18.6013	3.44203	14.9351	2.26056	14.4125	10.6747	10.3939	5.49766	2.20827	4.50172	19.5596	7.52187	7.48121	5.00115	4.34644	2.0086	1.50106	1.39166	0.819026	24.9925	2	5.04155	0.96317	6.04703	5.17898	2.16617	1.8262	7.51619	0	8.20473	2.83546	19.5051	2.38626	8.94811	24.7119	0
Methylobacterium_variabile	4.77636	0	1.03889	0	18.7519	13.1303	11.1866	23.2324	13.5634	16.2141	16.012	5.19696	4.65187	1.10413	8.25315	16.6619	1.88047	6.41246	5.00115	6.51966	2.0086	0.750528	4.8708	4.09513	12.4963	2	8.06648	0	4.03135	5.17898	7.22057	0.913102	3.00648	0.893773	9.23032	0	33.8089	2.38626	10.0666	7.90781	1.04318
Tarenaya_hassleriana	10.508	15.036	10.3889	13.0324	18.7519	4.37677	8.60507	8.29728	6.02817	7.20626	9.34033	5.19696	14.8014	6.62481	13.5051	7.96874	9.40234	7.48121	4.16763	7.60627	7.03009	18.0127	30.6165	22.1137	16.0666	9	13.108	16.3739	10.0784	8.63164	12.275	13.6965	24.0518	7.15018	14.3583	9.45152	28.6075	11.9313	13.4222	7.90781	10.4318
Podiceps_cristatus	56.361	62.0235	52.9836	64.1593	95.8431	51.4271	64.538	91.2701	45.9648	100.888	76.057	64.962	55.8224	37.5406	52.52	47.088	92.143	69.4683	47.511	44.551	60.2579	129.091	105.766	67.1602	74.085	51	70.5817	102.096	57.4468	88.0427	54.1543	57.5254	114.246	54.5201	48.2028	68.9961	176.847	61.2472	77.1775	72.1587	83.4544
Papilio_glaucus	41.0767	59.2043	35.3224	43.1071	52.0887	14.2245	56.7935	48.1242	14.3169	26.1227	56.042	23.3863	36.792	25.3951	34.5132	22.4574	50.7727	32.0623	25.0058	19.559	31.1333	67.5476	48.708	41.7703	46.4147	19	35.2909	88.6116	33.2587	46.6109	29.6043	31.0455	81.1748	39.326	25.6398	46.3125	89.7237	34.203	44.7406	41.516	34.425
Mesorhizobium_sp._LSJC264A00	5.73163	7.518	9.35004	5.01245	20.8355	7.65935	2.58152	6.63782	9.04225	1.80156	8.006	9.09468	10.9953	6.62481	15.0057	9.4176	9.40234	21.3749	6.66821	4.34644	9.03869	6.00423	7.65412	9.82832	13.3889	11	5.04155	18.3002	11.0862	10.358	9.38674	8.21791	15.0324	5.36264	20.5118	5.67091	13.0034	5.56793	12.3037	3.9539	2.08636
Methylobacterium_sp._yr668	10.508	5.6385	10.3889	0	30.2114	45.9561	14.6286	51.4431	19.5915	27.9243	48.036	7.79544	15.2243	5.52067	15.0057	28.2528	9.40234	7.48121	9.16878	6.51966	2.0086	3.00211	10.4374	9.00929	21.4222	17	8.06648	0.96317	8.06271	25.8949	12.275	6.39171	21.0453	0.893773	20.5118	0.945152	33.8089	11.1359	30.1999	21.7465	0
Oryza_brachyantha	154.754	265.949	28.0501	180.448	1455.36	137.868	188.451	1203.11	10.5493	105.392	1234.26	64.962	1075.43	24.291	1533.58	96.3493	695.773	21.3749	30.0069	15.2125	206.886	351.998	54.2747	189.195	24.0999	30	26.2161	428.611	828.443	909.775	14.4411	23.7406	667.438	177.861	993.798	217.385	1412.17	70.7923	2138.6	85.9974	186.729
Sturnus_vulgaris	162.396	267.829	121.551	184.458	306.281	160.846	215.127	277.129	118.303	103.59	284.213	70.1589	125.178	85.0184	283.608	131.122	193.688	56.6434	100.857	84.7556	170.731	293.457	793.245	156.434	84.7961	85	146.205	357.336	75.5879	203.707	103.254	158.88	142.808	162.667	109.738	226.837	295.178	62.8381	289.695	587.155	207.593
Anoplopoma_fimbria	61.1374	133.445	40.5168	87.2166	89.5925	54.7097	87.7717	117.821	52.7465	112.598	85.3973	40.2764	54.1308	27.6034	49.5189	53.6079	60.175	52.3684	50.0115	31.5117	40.172	129.091	103.679	97.4641	101.755	35	78.6482	133.881	64.5017	62.1478	59.9307	63.9171	111.24	51.8388	53.3308	65.2155	118.331	58.861	116.325	87.9744	59.4613
Atta_cephalotes	5.73163	19.7348	10.3889	13.0324	14.5848	1.09419	12.9076	23.2324	0.753521	11.7102	17.3463	15.5909	8.03504	2.20827	9.75372	6.51988	5.64141	6.41246	10.0023	11.9527	6.02579	21.7653	11.1333	13.9234	16.0666	6	6.04986	31.7846	5.03919	12.0843	3.61029	15.5227	9.01943	8.04396	7.17914	11.3418	32.5086	11.1359	12.3037	13.8387	17.7341
Lactococcus_lactis	5.73163	7.518	13.5056	3.00747	12.5013	12.0361	10.3261	16.5946	9.04225	6.30548	17.3463	3.89772	4.22897	2.20827	7.50286	13.0398	3.76094	11.7562	6.66821	2.17322	4.0172	12.0085	14.6124	21.2947	8.92591	2	3.02493	14.4475	4.03135	3.45266	10.1088	4.56551	4.50971	4.46886	5.12796	9.45152	11.7031	1.59084	3.35554	63.2625	4.17272
Okapia_johnstoni	5617	6824.47	6403.74	5671.08	6671.51	6004.93	5442.71	5791.5	4432.96	5177.7	6056.54	5769.92	5774.24	5158.52	5551.37	5949.03	5413.87	5933.66	5794.67	5782.94	5369.99	7952.6	14387.7	6632.47	5482.29	5932	6194.05	8520.2	5653.97	5983.45	5648.65	5621.97	5575.51	4659.24	5350.51	6447.83	6543.32	5798.6	7745.71	6236.3	5240.94
Cavenderia_fasciculata	17.1949	26.313	13.5056	25.0622	19.7937	16.4129	22.3732	11.6162	10.5493	22.5196	21.3493	14.2916	16.0701	12.1455	24.7594	15.9375	13.1633	13.8937	10.0023	13.0393	14.0602	15.7611	27.1373	17.1996	19.637	19	18.1496	44.3058	21.1646	17.2633	13.7191	18.262	27.0583	16.0879	20.5118	19.8482	26.0069	11.9313	23.4888	13.8387	21.9068
Delftia_sp._K82	34.3898	9.3975	58.178	6.01494	118.762	131.303	23.2337	233.983	24.8662	144.125	142.774	75.3559	39.3294	37.5406	52.52	128.224	48.8922	47.0247	94.1884	49.9841	5.02149	5.2537	6.26246	16.3805	157.096	68	71.59	6.74219	37.29	119.117	20.9397	4.56551	81.1748	3.57509	82.0473	3.78061	224.959	51.7022	86.1256	104.778	3.12954
Myotis_brandtii	2833.33	1750.76	2507.89	2343.82	1927.28	1968.45	1782.11	1858.59	2557.45	2615.87	1665.25	2877.82	3025.83	2917.12	2027.27	2066.8	2997.47	2540.4	2052.97	2834.97	2306.87	1507.06	1602.49	2163.05	2138.65	2852	1991.41	1410.08	2726.2	2613.66	2579.91	2128.44	2883.21	2290.74	2572.18	1776.89	1751.56	2550.91	1357.88	1522.25	2671.58
Solanum_habrochaites	107.946	62.0235	34.2835	146.364	195.853	80.9703	33.5598	82.9728	36.9225	108.995	52.039	124.727	45.6729	37.5406	54.0206	28.9772	45.1312	52.3684	34.1746	54.3305	119.512	385.021	121.074	200.661	60.6962	59	79.6565	236.94	41.3214	281.391	49.0999	109.572	165.356	127.81	130.25	187.14	96.2254	47.7251	65.9923	117.629	631.124
Schrenkiella_parvula	9.55271	4.69875	5.19447	7.01743	12.5013	3.28258	7.74457	11.6162	2.26056	7.20626	9.34033	1.29924	9.30374	2.20827	8.25315	5.79545	9.40234	3.20623	8.33526	6.51966	1.0043	6.00423	6.95829	9.00929	6.24813	8	5.04155	12.5212	9.07055	8.63164	2.88823	15.5227	24.0518	3.57509	6.15355	1.8903	27.3072	7.15877	14.5407	11.8617	4.17272
3300006025_____Ga0075474_10003162	5.73163	0	7.27225	8.01992	10.4177	19.6955	9.46558	13.2756	5.27465	10.8094	21.3493	11.6932	5.92056	3.3124	14.2554	15.213	0	8.54995	5.00115	9.7795	5.02149	0	19.4832	10.6473	11.6037	0	9.07479	14.4475	6.04703	0	13.7191	4.56551	3.00648	3.57509	8.20473	17.0127	0	0	8.94811	12.8502	7.30226
Equus_asinus	2976.63	1536.49	2909.94	118825	2431.5	2109.6	2093.61	3139.69	2677.26	2341.13	2261.69	2382.81	2759.83	3084.95	2623.75	2507.25	3206.2	2025.27	36362.6	2492.68	1808.74	1171.57	1334.6	1730.6	2484.97	2874	2350.37	1218.41	2294.85	2442.75	2686.77	1465.53	2868.18	1960.04	3092.16	43007.3	2202.78	2693.29	2044.64	1613.19	2309.6
Cimex_lectularius	56.361	69.5415	37.4002	52.1295	60.4228	30.6374	37.0018	66.3782	22.6056	49.543	62.7137	24.6856	51.5934	25.3951	29.2612	44.9147	52.6531	35.2685	43.3433	30.4251	35.1505	97.5687	54.2747	58.1509	46.4147	32	54.4488	276.43	35.2744	62.1478	31.7705	51.1337	106.73	33.0696	26.6654	54.8188	120.932	46.9297	43.622	57.3316	42.7704
Apostichopus_japonicus	74.5112	98.6738	74.8003	101.251	110.428	89.7238	73.1431	111.184	51.2394	175.653	96.072	84.4506	87.1168	56.3109	81.0309	69.5453	99.6648	68.3996	56.6798	77.1494	79.3396	174.123	329.823	102.378	116.929	62	65.5402	190.708	95.7447	79.4111	62.819	98.615	114.246	68.8205	76.9194	114.363	236.662	85.1098	80.533	84.0205	105.361
Vollenhovia_emeryi	44.8978	58.2645	32.2057	52.1295	83.3418	61.2748	58.5145	39.8269	41.4436	48.6422	54.7077	35.0795	43.1355	32.0199	45.0172	51.4346	50.7727	36.3373	53.3457	27.1653	45.1934	69.0486	50.0997	43.4084	29.4555	45	46.3823	184.929	45.3527	55.2425	27.4382	49.3075	49.6069	55.4139	51.2796	78.4476	71.5189	34.9984	59.2812	74.1357	50.0727
Tetrahymena_elliotti	12.4185	14.0963	9.35004	10.0249	18.7519	10.9419	6.88406	21.5729	9.79577	7.20626	12.009	7.79544	8.45794	4.41654	4.50172	2.17329	15.0437	9.61869	5.83468	5.43305	7.03009	15.0106	8.34995	9.82832	7.14072	9	8.06648	20.2266	7.05487	17.2633	7.94263	5.47861	16.5356	8.93773	3.07677	13.2321	15.6041	16.7038	15.6592	16.8041	10.4318
Leersia_perrieri	62.0926	26.313	28.0501	15.0373	34.3785	16.4129	27.5362	38.1675	68.5704	44.1383	33.3583	67.5605	91.7687	18.7703	62.2737	28.2528	77.0992	32.0623	17.504	39.118	9.03869	49.5349	36.8789	38.4942	15.174	32	16.133	33.7109	64.5017	50.0635	29.6043	13.6965	96.2072	16.9817	53.3308	27.4094	68.9182	34.9984	32.4369	23.7234	12.5182
Macrocentrus_cingulum	18.1502	8.45775	9.35004	8.01992	10.4177	5.47097	7.74457	18.254	6.02817	11.7102	16.012	5.19696	5.92056	11.0413	9.00343	4.34658	13.1633	12.8249	5.83468	6.51966	17.0731	5.2537	11.1333	10.6473	9.8185	9	4.03324	108.838	16.1254	22.4423	4.33234	13.6965	15.0324	16.9817	6.15355	6.61607	22.1058	23.0671	13.4222	3.9539	13.5613
Octodon_degus	15982.6	10545.9	14013.6	13371.2	11231.4	11761.5	10333.8	10788.1	13781.1	14947.6	10000.8	15260.9	16541.6	15175.2	12014.3	12197.2	15762.1	13912.9	12068.6	14588.8	13876.4	10466.9	10428.4	13816.2	12711.4	15689	11508.9	9146.26	14478.6	14798.1	13316.9	12852.8	15309	12440.4	14438.3	10678.3	11411.8	14778.9	9582.31	9808.65	13858.7
Caenorhabditis_tropicalis	0.955271	8.45775	4.15557	8.01992	12.5013	9.84774	6.02355	11.6162	4.52112	16.2141	4.003	2.59848	4.65187	3.3124	3.75143	4.34658	5.64141	1.06874	6.66821	1.08661	5.02149	19.5137	8.34995	9.82832	10.7111	73	8.06648	21.1897	8.06271	6.90531	3.61029	2.7393	7.51619	4.46886	3.07677	6.61607	10.4027	5.56793	6.71108	2.96543	3.12954
Myotis_davidii	3285.18	2745.01	3587.3	3100.7	2661.73	2651.23	2634.01	2653.47	2818.92	3580.61	2628.64	3848.35	3800.58	3362.09	2966.63	2862.95	3599.22	3203.02	2878.16	3371.75	3000.84	2457.98	53514.1	2947.68	3024.99	3406	3161.05	2451.27	3162.6	3435.39	3130.12	2971.23	3263.53	3163.06	3603.93	2746.61	3152.03	3122.81	2386.91	2228.02	3169.18
Anopheles_cracens	10.508	6.57825	18.7001	10.0249	38.5456	12.0361	22.3732	24.8918	6.78169	64.8563	9.34033	12.9924	13.9556	4.41654	14.2554	6.51988	11.2828	8.54995	4.16763	10.8661	13.0559	75.0528	37.5748	11.4664	13.3889	6	9.07479	27.9319	5.03919	18.9896	3.61029	11.8703	15.0324	11.619	8.20473	12.287	102.727	20.6809	16.7777	13.8387	12.5182
Atta_colombica	7.64217	9.3975	3.11668	15.0373	13.543	3.28258	10.3261	18.254	9.04225	8.10704	26.6867	7.79544	10.5724	3.3124	10.504	5.07102	11.2828	6.41246	5.83468	9.7795	13.0559	20.2643	11.1333	14.7425	8.92591	6	13.108	26.0056	9.07055	20.7159	7.94263	12.7834	7.51619	8.93773	7.17914	12.287	26.0069	7.95419	8.94811	13.8387	8.34544
Phialophora_verrucosa	10.508	23.4938	10.3889	17.0423	29.1696	9.84774	16.3496	26.5513	4.52112	24.3211	46.7017	9.09468	3.80607	0	15.756	5.07102	3.76094	7.48121	14.1699	8.69289	9.03869	20.2643	17.3957	11.4664	24.0999	3	19.1579	20.2266	11.0862	13.8106	7.22057	10.9572	7.51619	7.15018	16.4095	18.903	40.3106	3.97709	49.2146	18.781	10.4318
Carlito_syrichta	18560.9	17713.4	18030	18932	17314.3	17326.5	16194.7	16677.5	17294.1	18318.3	17378.4	19678.3	20088.5	18984.5	17318.1	17201.6	19099.9	18269.1	16629.7	18361.5	18000	17373.2	58663.2	18793.4	19189.8	19034	17201.8	17131.9	18419.3	19340.1	18128.7	17109.7	19220.4	17231.9	19039.1	17113.9	17559.8	17813.4	16424.3	16121.1	18194.1
Urile_pelagicus	16.2396	29.1323	22.8557	20.0498	63.5482	29.5432	12.0471	36.508	16.5775	51.3446	28.021	23.3863	18.1846	16.562	14.2554	24.6306	20.6852	19.2374	16.6705	15.2125	16.0688	41.2791	48.0122	30.304	26.7777	17	24.1995	27.9319	20.1568	25.8949	15.1632	26.4799	27.0583	11.619	18.4606	24.574	58.5154	28.6351	32.4369	28.6658	22.95
Rhizaria_sp._SCN_62-66	11.4633	8.45775	14.5445	6.01494	8.33418	5.47097	6.02355	9.95674	10.5493	16.2141	12.009	11.6932	16.493	8.83308	10.504	7.96874	18.8047	12.8249	5.00115	11.9527	6.02579	6.00423	8.34995	6.55221	9.8185	11	11.0914	16.3739	10.0784	15.537	12.997	10.0441	12.0259	8.04396	15.3839	3.78061	14.3038	12.7267	14.5407	7.90781	7.30226
Acyrthosiphon_pisum	51.5847	68.6018	38.4391	56.1394	79.1748	43.7677	55.0725	89.6106	25.6197	53.1462	89.4003	23.3863	52.0163	25.3951	45.7674	42.7414	58.2945	44.8872	74.1838	42.3778	56.2407	113.33	62.6246	67.1602	51.7703	31	73.6067	24526.2	38.2979	103.58	44.7675	55.6992	195.421	42.0073	35.8957	66.1607	143.038	370.665	51.4516	75.1242	83.4544
Branchiostoma_floridae	111.767	325.154	242.062	186.463	355.245	358.895	280.525	340.189	135.634	152.232	372.279	177.996	154.78	129.184	296.363	349.176	131.633	275.736	276.731	189.07	208.894	273.192	411.931	149.882	198.155	16	345.851	392.01	200.56	234.781	153.798	216.405	135.291	137.641	164.095	302.449	395.304	283.169	390.361	518.95	160.65
3300011441_____Ga0137452_1001322	6.6869	22.554	11.4278	2.00498	20.8355	26.2606	14.6286	19.9135	3.01408	4.50391	12.009	2.59848	1.69159	9.93721	9.75372	9.4176	5.64141	16.0312	2.50058	6.51966	18.0774	30.7717	21.5707	8.19026	7.14072	1	9.07479	34.6741	7.05487	8.63164	18.7735	8.21791	4.50971	10.7253	3.07677	6.61607	13.0034	8.74961	15.6592	16.8041	7.30226
Oncopeltus_fasciatus	85.9744	137.204	76.8781	109.271	146.89	89.7238	117.029	157.648	76.8591	113.499	158.786	50.6703	77.8131	69.5605	81.7812	94.9004	105.306	68.3996	53.3457	58.677	81.3482	210.148	134.991	124.492	87.4739	63	96.7978	245.608	67.5252	113.938	80.1483	94.0495	154.834	67.033	58.4587	358.213	260.069	101.814	146.525	121.583	83.4544
Balaenoptera_bonaerensis	737.469	597.681	791.637	522.297	758.411	834.869	510.281	721.863	667.619	797.192	723.209	854.9	1073.31	985.992	726.277	736.022	1002.29	992.863	689.326	914.926	501.145	607.928	599.804	584.785	756.024	909	782.449	607.76	961.478	887.333	519.159	555.166	950.046	423.648	787.654	519.834	799.711	979.956	763.945	910.386	474.647
Blastomyces_dermatitidis	4.77636	11.277	18.7001	3.00747	18.7519	26.2606	12.0471	16.5946	6.78169	8.10704	20.015	2.59848	9.72663	16.562	18.0069	25.3551	15.0437	26.7186	0.833526	9.7795	7.03009	12.0085	9.7416	13.9234	9.8185	12	16.133	15.4107	12.0941	10.358	0	5.47861	7.51619	10.7253	9.23032	1.8903	37.7099	0.795419	23.4888	3.9539	9.38862
Thamnophis_sirtalis	143.291	266.889	178.69	208.518	292.738	181.636	219.429	267.172	118.303	214.386	232.174	150.712	160.278	108.205	169.565	197.045	188.047	150.693	152.535	115.181	140.602	318.224	1627.54	198.204	220.47	116	205.695	296.656	168.309	241.686	135.025	199.056	208.95	140.322	179.479	225.891	448.618	207.604	212.518	257.992	152.304
Parus_major	64.0032	133.445	92.4615	93.2316	150.015	130.209	111.866	137.735	72.338	104.491	138.771	76.6551	68.0864	54.1026	96.0366	108.665	94.0234	59.8496	80.852	67.3699	73.3138	126.089	148.212	98.2832	97.2924	69	134.105	207.082	67.5252	117.39	80.1483	89.484	91.6975	71.5018	68.7146	90.7346	171.645	115.336	145.407	162.11	75.109
Nothobranchius_furzeri	87.885	114.65	57.1391	80.1992	122.929	88.6296	75.7246	141.054	43.7042	104.491	136.102	81.8521	68.0864	40.853	96.0366	75.3408	75.2187	61.9871	52.5121	51.0707	67.288	146.353	126.641	68.7982	69.6221	55	73.6067	404.531	75.5879	124.296	49.8219	92.2233	135.291	79.5458	81.0217	81.2831	192.451	72.3831	110.733	131.467	84.4976
3300000117_____DelMOWin2010_c10003738	15.2843	1.8795	9.35004	2.00498	17.7101	14.2245	6.02355	18.254	14.3169	11.7102	25.3523	9.09468	4.65187	7.72894	15.756	14.4886	3.76094	5.34372	8.33526	2.17322	0	0	0	0.819026	11.6037	19	5.04155	0	12.0941	24.1686	1.44411	0	15.0324	0	11.2815	0	15.6041	9.54503	10.0666	14.8271	0
Bordetella_genomosp._8	13.3738	0	8.31115	0	23.9608	14.2245	2.58152	8.29728	8.28873	8.10704	8.006	12.9924	31.2944	6.62481	27.7606	12.3153	16.9242	11.7562	6.66821	7.60627	0	0	0	0	11.6037	10	13.108	0	25.196	10.358	0.722057	0	13.5291	0.893773	33.8445	0.945152	13.0034	8.74961	10.0666	7.90781	0
Anas_platyrhynchos	25.7923	38.5298	28.0501	20.0498	42.7127	38.2968	29.2572	51.4431	23.3591	38.7336	52.039	22.0871	12.6869	22.0827	39.0149	39.1193	18.8047	34.1998	41.6763	26.0787	82.3525	39.0275	80.7161	27.8469	25.8851	32	41.3407	64.5324	43.3371	46.6109	20.9397	46.5682	27.0583	29.4945	20.5118	47.2576	61.1161	58.861	45.8591	91.9283	27.1227
Glossina_brevipalpis	266.521	521.562	211.934	362.901	325.033	112.702	587.727	320.275	33.1549	94.5821	353.598	67.5605	30.4486	287.075	388.648	67.3721	189.927	220.161	376.754	207.543	366.569	366.258	85.587	182.643	303.481	236	380.133	747.42	317.469	279.665	45.4896	46.5682	220.976	389.685	526.128	555.75	386.202	230.671	671.108	539.708	55.2886
Phylloscopus_trochiloides	115.588	121.228	104.928	76.1892	114.595	76.5935	74.8641	106.205	77.6126	89.1774	94.7377	106.538	79.0818	135.809	96.0366	86.2073	103.426	106.874	80.852	109.748	114.49	85.5602	221.274	104.835	85.6887	117	109.906	94.3906	86.6741	101.853	53.4322	82.1791	99.2137	100.103	59.4843	119.089	105.328	131.244	70.4664	115.652	128.311
Ancylostoma_duodenale	9.55271	16.9155	8.31115	11.0274	16.6684	5.47097	8.60507	19.9135	5.27465	25.2219	17.3463	6.4962	8.45794	6.62481	11.2543	12.3153	20.6852	16.0312	6.66821	6.51966	6.02579	21.0148	20.8749	16.3805	7.14072	7	10.0831	15.4107	9.07055	12.0843	4.33234	14.6096	19.5421	8.93773	7.17914	13.2321	31.2082	9.54503	14.5407	18.781	8.34544
Nicotiana_tomentosiformis	15.2843	77.0595	12.4667	58.1444	40.6291	15.3187	36.1413	46.4648	12.0563	47.7415	42.6987	33.7802	21.1449	5.52067	10.504	11.5909	24.4461	24.5811	37.5087	16.2992	26.1118	56.2896	20.8749	26.2088	68.7295	15	30.2493	39.49	38.2979	48.3372	10.8309	24.6537	40.5874	14.3004	14.3583	62.3801	79.3209	20.6809	40.2665	36.5736	26.0795
Sanghuangporus_baumii	2.86581	9.3975	3.11668	8.01992	11.4595	5.47097	5.16304	13.2756	0	8.10704	13.3433	1.29924	3.38318	1.10413	7.50286	5.79545	0	7.48121	2.50058	2.17322	6.02579	14.26	14.6124	9.00929	9.8185	2	4.03324	19.2634	6.04703	3.45266	3.61029	6.39171	12.0259	1.78755	3.07677	10.3967	14.3038	1.59084	16.7777	3.9539	4.17272
Callipepla_squamata	70.6901	114.65	83.1115	74.1842	119.804	98.4774	90.3533	124.459	58.7746	55.8485	154.783	44.1741	50.7477	68.4563	86.2829	91.2783	58.2945	91.912	102.524	83.669	66.2837	105.074	125.945	53.2367	67.8369	69	105.873	150.254	52.4076	86.3164	36.8249	97.7019	91.6975	58.989	39.9981	144.608	174.246	102.609	119.681	131.467	97.0158
Taeniopygia_guttata	107.946	172.914	114.278	119.296	160.433	123.644	145.426	127.778	107.753	121.606	204.153	100.041	115.028	101.58	141.804	140.54	124.111	106.874	101.69	107.574	94.4041	171.12	166.303	102.378	127.64	102	167.38	214.787	110.862	141.559	108.309	130.574	123.266	109.934	88.2009	150.279	235.362	154.311	173.37	195.718	110.577
Ramazzottius_varieornatus	18.1502	47.9273	25.9723	31.0772	30.2114	64.5574	34.4203	63.0593	21.0986	19.8172	69.3853	12.9924	24.1051	23.1868	36.764	44.9147	22.5656	23.5124	1.66705	22.8188	29.1247	20.2643	50.7955	10.6473	23.2074	18	39.3241	104.022	39.3057	36.2529	20.2176	22.8275	10.5227	25.0256	25.6398	1.8903	59.8158	19.8855	64.8738	47.4468	21.9068
Haliaeetus_leucocephalus	2.86581	6.57825	7.27225	9.02241	12.5013	9.84774	5.16304	4.97837	3.7676	14.4125	5.33733	5.19696	6.76635	3.3124	4.50172	7.24431	16.9242	9.61869	0.833526	3.25983	1.0043	24.0169	14.6124	4.09513	4.46295	7	7.05817	7.70536	17.1333	6.90531	1.44411	4.56551	12.0259	0	5.12796	8.50637	33.8089	11.9313	8.94811	12.8502	4.17272
Rana_catesbeiana	250.281	353.346	259.723	323.804	424.002	286.679	277.944	394.951	155.225	399.047	398.966	241.659	266.002	158.995	247.594	241.235	274.548	267.186	265.061	187.984	250.07	608.678	478.034	333.344	347.218	188	299.468	461.358	244.905	476.467	215.895	283.975	425.416	203.78	218.451	365.774	656.673	369.074	360.161	381.552	341.12
Xenopus_tropicalis	134.693	195.468	155.834	144.359	211.48	118.173	150.589	243.94	94.1901	135.117	230.84	83.1513	101.072	100.476	135.051	149.957	133.513	168.861	125.029	121.7	101.434	267.939	322.169	144.968	162.451	102	188.554	283.172	170.325	198.528	109.031	133.313	201.434	134.066	113.841	136.102	384.901	155.902	202.451	181.88	117.879
Delftia_tsuruhatensis	29.6134	6.57825	48.828	4.00996	116.679	137.868	12.9076	202.454	19.5915	132.415	156.117	55.8673	45.6729	18.7703	44.2669	87.6561	41.3703	47.0247	75.0173	47.8109	1.0043	6.00423	1.39166	12.2854	136.566	59	61.5069	3.85268	41.3214	98.4007	19.4955	4.56551	82.6781	3.57509	76.9194	0	180.748	53.2931	89.4811	109.721	5.2159
Moraxella_osloensis	3.82109	3.759	4.15557	12.0299	9.37596	18.6013	11.1866	14.9351	8.28873	10.8094	12.009	7.79544	2.96028	1.10413	11.2543	7.24431	5.64141	4.27497	6.66821	4.34644	8.03439	12.0085	11.8291	14.7425	15.174	5	3.02493	6.74219	3.02352	1.72633	14.4411	4.56551	3.00648	8.04396	9.23032	3.78061	11.7031	22.2717	5.59257	13.8387	15.6477
Trionymus_perrisii	41.0767	71.421	56.1002	39.0971	58.3393	59.0864	36.1413	76.335	31.6479	33.3289	72.054	28.5833	43.5584	30.9158	51.7697	57.23	35.7289	49.1622	24.1722	38.0314	36.1548	58.5412	78.6287	36.8562	33.0259	26	67.5568	190.708	42.3292	70.7794	31.0485	40.1765	55.6198	35.7509	38.9725	33.0803	83.2219	45.3389	72.7034	78.0896	30.2522
Salmo_salar	2894.47	5315.23	1498.08	6106.17	3038.85	300.903	2293.25	4541.93	146.183	1488.09	381.619	331.306	170.428	170.037	217.583	210.085	1367.1	3641.21	13303.1	177.118	2026.68	2604.33	522.567	1031.15	249.925	3878	2466.33	543.228	3127.32	4673.17	1428.95	335.108	607.308	311.033	296.396	13886.2	6536.82	229.081	299.762	601.982	975.374
Flavonifractor_plautii	463.307	935.991	496.591	659.638	1451.19	862.224	760.688	1040.48	310.451	422.467	1111.5	443.041	565.836	347.802	1162.94	780.212	453.193	521.547	643.482	411.825	739.164	1119.79	849.607	692.077	726.569	422	842.948	1167.36	807.279	847.627	468.615	431.897	428.423	610.447	735.349	919.633	1079.28	493.955	1512.23	687.979	495.511
Drosophila_suzukii	127.051	297.901	97.656	115.286	69.7988	414.699	269.339	185.859	125.084	159.438	281.544	176.697	148.437	139.121	216.833	208.636	110.948	60.9184	17.504	82.5824	193.83	292.706	294.336	113.026	275.81	157	255.103	439.205	95.7447	174.359	123.472	245.624	136.795	197.524	155.89	45.3673	313.383	128.858	337.791	397.367	176.297
Sphaerulina_populicola	1.91054	7.518	3.11668	9.02241	8.33418	5.47097	7.74457	8.29728	0.753521	4.50391	9.34033	1.29924	3.38318	2.20827	1.50057	4.34658	0	3.20623	5.83468	2.17322	6.02579	5.2537	44.533	2.45708	16.9592	3	6.04986	18.3002	0	1.72633	2.16617	6.39171	4.50971	7.15018	4.10237	4.72576	5.20137	5.56793	19.0147	15.8156	1.04318
Patagioenas_fasciata	154.754	162.577	162.067	188.468	170.851	202.426	189.312	240.621	132.62	189.164	209.49	124.727	153.089	139.121	153.058	173.863	176.764	136.799	144.2	178.204	129.555	277.695	340.956	194.928	176.733	121	156.288	200.339	122.956	182.991	124.916	180.794	229.995	131.385	122.045	149.334	287.376	194.878	257.258	154.202	127.268
Phaseolus_vulgaris	30.5687	41.349	30.1279	52.1295	58.3393	30.6374	41.3044	51.4431	28.6338	45.0391	61.3793	15.5909	31.7173	16.562	35.2634	38.3948	48.8922	50.231	40.0092	26.0787	32.1376	72.8013	62.6246	63.8841	34.811	22	37.3075	77.0536	50.3919	46.6109	16.6073	45.6551	61.6328	34.8571	26.6654	36.8609	113.13	42.1572	68.2293	39.539	41.7272
Oryctolagus_cuniculus	11179.5	8029.23	9221.22	10064	8707.14	9008.49	7208.47	8056.66	8938.26	10307.7	7763.15	11312.5	12079.6	10381.1	8650.8	9113.34	11687.1	10697.1	8643.66	11280.1	10052	8027.65	8214.26	10183.8	9582.85	11063	7689.38	8063.66	10666	10401.1	9869.08	9142.89	11136	9320.26	10324.6	8558.35	8950.26	9892.62	8308.32	7188.2	10502.7
Bison_bison	1114.8	954.786	918.382	1131.81	1193.87	1100.76	962.047	14344.3	874.838	1181.83	1006.09	1288.85	1293.64	984.888	901.093	966.391	1244.87	1047.37	921.88	984.469	1101.72	1224.86	990.86	1232.63	1092.53	1026	823.79	1047.93	1059.24	1246.41	1030.38	1037.28	1315.33	1002.81	1093.28	1050.06	1084.49	983.933	1045.81	1023.07	1385.34
Eucalyptus_camaldulensis	20.0607	21.6143	7.27225	26.0647	33.3367	18.6013	13.7681	28.2108	18.838	18.0156	29.3553	10.3939	25.3738	11.0413	113.293	14.4886	13.1633	10.6874	16.6705	7.60627	11.0473	24.7674	29.2248	19.6566	20.5296	11	19.1579	39.49	14.1097	12.0843	14.4411	19.1751	39.0842	16.9817	15.3839	22.6837	37.7099	17.4992	19.0147	22.7349	12.5182
Dicentrarchus_labrax	1014.5	2497.86	1323.55	1429.55	2649.23	1903.9	1056.7	2444.38	776.88	662.976	2074.89	938.051	1361.73	1425.44	2656.01	1640.84	661.925	2007.1	2344.71	1559.29	1637.01	2153.27	2047.82	1182.67	2471.58	1478	1915.79	3112.96	1462.37	2037.07	541.543	1183.38	922.988	1282.56	1506.59	2397.85	2482.35	2678.17	2734.77	3469.55	1447.93
Arachis_duranensis	41.0767	90.216	38.4391	45.112	71.8823	43.7677	54.212	58.081	24.8662	48.6422	93.4033	25.9848	36.3692	17.6662	53.2703	34.0482	45.1312	42.7497	36.6751	20.6456	35.1505	92.315	82.8036	68.7982	63.3739	22	44.3657	129.065	38.2979	62.1478	24.5499	51.1337	79.6716	32.1758	41.0237	69.9413	130.034	41.3618	78.296	55.3547	42.7704
Trifolium_pratense	24.8371	45.108	22.8557	33.0822	85.4254	24.0723	41.3044	63.0593	15.0704	48.6422	73.3883	29.8825	30.0257	11.0413	39.0149	31.1505	20.6852	19.2374	22.5052	21.7322	24.1032	72.8013	73.7579	49.1416	49.9851	19	45.374	68.3851	31.243	36.2529	22.3838	48.3944	51.1101	29.4945	26.6654	37.8061	101.427	38.1801	73.8219	52.3892	28.1659
Heliconius_xanthocles	83.1086	247.154	906.954	75.1867	170.851	128.021	222.011	170.924	72.338	5809.14	29.3553	1.29924	86.271	30.9158	160.561	130.398	77.0992	21.3749	25.8393	28.2519	114.49	4049.85	3542.46	77.8075	41.0592	17	76.6316	344.815	104.815	103.58	76.538	69.3957	61.6328	161.773	117.943	99.241	5285.89	725.422	23.4888	365.736	91.7999
7000000109_____SRS011306_Baylor_scaffold_89223	12.4185	19.7348	6.23336	6.01494	21.8772	26.2606	5.16304	34.8486	9.04225	38.7336	8.006	24.6856	8.88084	1.10413	15.0057	10.142	7.52187	11.7562	15.837	4.34644	16.0688	13.5095	15.3082	7.37124	8.92591	8	6.04986	6.74219	8.06271	36.2529	5.0544	7.30481	6.01295	3.57509	17.4351	3.78061	20.8055	1.59084	6.71108	2.96543	5.2159
Anaplasma_phagocytophilum	199.652	185.131	13.5056	41.1021	58.3393	180.542	45.6069	263.854	125.084	47.7415	44.033	24.6856	34.6776	4.41654	65.2749	49.9857	176.764	83.362	80.852	53.2439	141.606	72.0507	65.4079	31.942	16.9592	6	12.0997	225.382	48.3763	184.717	25.9941	31.9586	24.0518	32.1758	43.0748	71.8316	85.8226	39.7709	91.7181	64.2509	33.3818
Acropora_digitifera	30.5687	44.1683	17.6612	46.1145	44.7962	36.1084	25.8152	46.4648	13.5634	34.2297	25.3523	28.5833	19.8762	9.93721	24.7594	23.1818	18.8047	23.5124	20.8381	14.1259	26.1118	47.2833	41.0539	29.4849	37.4888	9	35.2909	89.5748	16.1254	44.8845	18.0514	30.1324	39.0842	18.7692	28.7166	34.0255	57.2151	101.814	41.385	52.3892	22.95
Capsicum_annuum	149.022	220.841	142.328	172.428	254.193	130.209	154.891	240.621	93.4366	212.585	245.517	107.837	158.586	115.934	156.059	154.304	229.417	134.662	129.196	114.094	139.598	319.725	256.065	212.128	169.592	107	198.637	455.579	152.184	208.886	106.142	150.662	320.19	117.978	122.045	217.385	418.71	149.539	206.925	228.338	179.427
Lymnaea_stagnalis	1090.92	2557.06	1379.65	1016.52	2159.6	5097.85	1796.74	1443.73	1877.02	695.404	2344.42	2186.62	3022.45	3121.39	4497.21	3043.33	1150.85	889.195	1196.11	2166.7	1506.45	3384.13	2283.01	1644.6	3963.99	1246	2246.52	6232.67	886.898	1705.61	584.144	1498.4	2098.52	1445.23	3488.04	1376.14	2430.34	2398.19	3329.82	4178.29	2315.86
Bacillus_sp._FJAT-25496	10.508	19.7348	16.6223	13.0324	32.295	10.9419	18.0707	18.254	10.5493	6.30548	28.021	3.89772	5.92056	12.1455	21.008	17.3863	5.64141	23.5124	0.833526	10.8661	14.0602	20.2643	37.5748	12.2854	9.8185	13	20.1662	26.0056	13.1019	18.9896	12.275	10.9572	6.01295	4.46886	6.15355	25.5191	27.3072	18.2946	25.7258	35.5851	7.30226
Enterobacter_hormaechei	20.0607	31.0118	18.7001	22.0548	35.4203	55.8039	27.5362	46.4648	10.5493	14.4125	44.033	25.9848	15.6472	19.8744	24.7594	32.5994	5.64141	24.5811	25.0058	29.3385	26.1118	33.0232	50.0997	11.4664	17.8518	15	41.3407	48.1585	11.0862	29.3476	21.6617	32.8717	15.0324	22.3443	23.5886	34.9706	41.611	19.8855	36.911	61.2855	15.6477
Drosophila_ananassae	13.3738	28.1925	13.5056	21.0523	26.0443	12.0361	13.7681	23.2324	5.27465	21.6188	22.6837	14.2916	9.30374	8.83308	12.0046	10.142	18.8047	13.8937	15.0035	7.60627	10.043	34.5243	59.1455	18.0186	13.3889	16	17.1413	36.6005	10.0784	25.8949	10.8309	14.6096	21.0453	6.25641	9.23032	16.0676	39.0103	23.0671	22.3703	10.8732	15.6477
Strongylus_vulgaris	11.4633	19.7348	13.5056	21.0523	18.7519	8.75355	21.5127	28.2108	9.04225	18.0156	24.018	6.4962	13.5327	7.72894	14.2554	5.79545	11.2828	9.61869	12.5029	13.0393	18.0774	35.2748	23.6582	18.8376	21.4222	15	21.1745	57.7902	12.0941	22.4423	10.1088	15.5227	16.5356	11.619	17.4351	12.287	31.2082	20.6809	19.0147	19.7695	15.6477
Heterorhabditis_bacteriophora	12.4185	35.7105	5.19447	45.112	12.5013	10.9419	15.4891	16.5946	4.52112	12.611	21.3493	12.9924	10.1495	6.62481	11.2543	4.34658	9.40234	5.34372	9.16878	5.43305	17.0731	39.778	5.56663	37.6752	14.2814	3	5.04155	44.3058	9.07055	8.63164	3.61029	6.39171	9.01943	9.8315	5.12796	51.0382	27.3072	9.54503	25.7258	11.8617	19.8204
Picoides_pubescens	173.859	543.176	179.729	256.637	287.529	253.853	282.246	265.513	158.993	214.386	397.631	155.909	147.168	145.746	247.594	207.912	173.003	201.993	189.21	255.354	191.821	288.953	7608.89	173.634	175.84	193	224.853	517.222	205.599	336.634	157.408	192.664	190.911	175.179	176.402	264.643	462.922	188.514	343.384	436.906	190.902
Variovorax_sp._PDC80	11.4633	14.0963	10.3889	2.00498	37.5038	40.4851	24.0942	21.5729	9.04225	49.543	40.03	25.9848	19.0304	7.72894	19.5074	28.2528	26.3266	12.8249	19.1711	10.8661	6.02579	20.2643	10.4374	24.5708	30.3481	12	13.108	7.70536	9.07055	32.8002	19.4955	5.47861	21.0453	5.36264	17.4351	3.78061	27.3072	11.1359	31.3184	24.7119	3.12954
Paenirhodobacter_sp._MME-103	10.508	0.93975	6.23336	13.0324	23.9608	17.5071	22.3732	9.95674	6.78169	13.5117	9.34033	19.4886	8.88084	4.41654	18.0069	21.7329	5.64141	7.48121	13.3364	10.8661	12.0516	3.00211	16.0041	10.6473	11.6037	0	7.05817	16.3739	11.0862	0	9.38674	10.0441	9.01943	10.7253	15.3839	21.7385	1.30034	0.795419	25.7258	16.8041	11.475
Anopheles_sinensis	166.217	59.2043	45.7113	46.1145	54.1722	45.9561	40.4438	137.735	43.7042	50.4438	46.7017	18.1894	51.5934	49.686	127.549	36.2215	110.948	44.8872	55.8462	55.4171	44.1891	42.7801	43.1414	52.4177	55.3406	35	60.4986	154.107	49.3841	46.6109	54.8763	43.8289	42.0907	39.326	27.691	39.6964	84.5223	54.0885	38.0295	32.6197	49.0295
Finegoldia_magna	6.6869	8.45775	11.4278	9.02241	10.4177	5.47097	1.72101	1.65946	3.01408	6.30548	9.34033	2.59848	2.96028	2.20827	1.50057	11.5909	1.88047	39.5435	42.5098	2.17322	4.0172	24.7674	6.26246	7.37124	16.9592	4	2.01662	6.74219	4.03135	0	4.33234	4.56551	3.00648	8.04396	4.10237	3.78061	6.50171	0	4.47406	20.758	4.17272
Papio_anubis	28045.8	21733.6	24438.9	25645.7	29409.3	28236.7	21352.6	25255.3	26411.7	32802	23421.6	32165.3	30635.1	26829.4	23166.6	25717.3	26971.6	25919.2	30367	25830.9	24512.9	23938.9	19811.6	29327.7	32568	28506	21765.4	17155	28413	29836.1	27235.3	23662.1	29782.1	22282.7	30759.5	40594.3	24671.4	25212.4	21418.4	18881.9	24052.6
Achromobacter_xylosoxidans	5.73163	2.81925	5.19447	0	19.7937	3.28258	3.44203	8.29728	6.02817	10.8094	13.3433	6.4962	3.38318	2.20827	4.50172	6.51988	5.64141	8.54995	5.00115	5.43305	2.0086	3.75264	4.17497	5.73318	14.2814	4	11.0914	0	3.02352	22.4423	2.16617	2.7393	3.00648	0.893773	8.20473	1.8903	14.3038	8.74961	11.1851	27.6773	3.12954
Enterococcus_faecium	9546.98	22253.3	10409.7	10268.5	20172.9	21458.2	28006.1	18114.6	9389.62	13438.8	18847.5	9546.81	14629.3	10754.3	22149.9	15346.3	9174.81	10787.9	14106.6	10829.2	14575.4	21895.9	17720.7	12323.9	13400.5	13399	14871.6	30160.7	21115.2	16329.3	8322.43	9671.57	9314.06	12039.1	16940.7	18287.8	22287.9	11477.9	27361.1	16622.2	12881.2
Acanthamoeba_culbertsoni	2.86581	2.81925	4.15557	1.00249	6.25064	4.37677	2.58152	4.97837	2.26056	4.50391	0	2.59848	1.26869	1.10413	4.50172	0.724431	1.88047	3.20623	0	2.17322	2.0086	3.75264	83.4995	2.45708	7.14072	0	2.01662	91.5011	4.03135	12.0843	3.61029	1.8262	3.00648	0.893773	6.15355	1.8903	10.4027	3.97709	5.59257	4.94238	3.12954
Comamonas_aquatica	4.77636	13.1565	1.03889	6.01494	7.29241	14.2245	4.30254	21.5729	2.26056	13.5117	13.3433	11.6932	6.76635	0	6.75257	18.8352	1.88047	4.27497	2.50058	3.25983	3.0129	6.75476	3.47914	18.8376	4.46295	2	2.01662	7.70536	5.03919	37.9792	10.8309	3.65241	3.00648	5.36264	6.15355	0.945152	14.3038	11.9313	12.3037	8.89628	4.17272
Acanthamoeba_royreba	5.73163	9.3975	10.3889	13.0324	19.7937	5.47097	4.30254	9.95674	6.78169	8.10704	13.3433	0	5.07477	6.62481	6.75257	4.34658	13.1633	7.48121	5.83468	1.08661	8.03439	15.0106	15.3082	14.7425	3.57036	3	5.04155	12.5212	10.0784	8.63164	6.49851	8.21791	0	2.68132	7.17914	10.3967	18.2048	4.77251	8.94811	12.8502	7.30226
Malassezia_equina	1.91054	0.93975	1.03889	6.01494	2.08355	9.84774	11.1866	0	0	3.60313	0	5.19696	1.69159	1.10413	3.75143	61.5766	1.88047	7.48121	0	0	3.0129	0.750528	1.39166	1.63805	99.0776	0	0	2.88951	21.1646	0	3.61029	0.913102	1.50324	0.893773	7.17914	0	3.90103	7.95419	2.23703	10.8732	4.17272
Heterodera_glycines	3.82109	5.6385	3.11668	8.01992	7.29241	3.28258	4.30254	8.29728	4.52112	9.9086	16.012	3.89772	5.07477	2.20827	0.750286	5.79545	5.64141	2.13749	3.3341	4.34644	3.0129	6.00423	13.2207	3.27611	5.35554	5	4.03324	44.3058	7.05487	8.63164	4.33234	5.47861	7.51619	4.46886	4.10237	6.61607	16.9045	5.56793	5.59257	9.88476	6.25908
Eurypyga_helias	60.1821	129.686	75.8392	104.259	118.762	83.1587	84.3297	126.119	61.0352	136.018	106.747	70.1589	80.7733	62.9357	81.0309	80.4118	94.0234	81.2245	72.5167	52.1573	64.2751	186.882	222.665	122.035	94.6146	60	78.6482	133.881	65.5095	98.4007	93.8674	104.094	127.775	59.8828	79.9961	92.6249	219.758	92.2686	139.814	107.744	81.3681
Lipotes_vexillifer	2495.17	3164.14	2440.36	2540.31	3212.83	3150.18	2657.25	3151.31	2301.25	2305.1	3054.29	2319.14	2432.08	2564.9	2788.81	3025.22	2435.21	2441.01	2393.05	2469.87	2521.79	3113.19	3291.27	2401.39	2469.8	2478	2706.31	3870.98	2440.99	2789.75	2279.53	2456.24	2299.95	2299.68	2358.86	2935.64	3279.46	3297.81	3287.31	4038.91	2408.7
Meloidogyne_arenaria	13.3738	11.277	6.23336	10.0249	16.6684	4.37677	18.9312	6.63782	3.7676	11.7102	10.6747	1.29924	6.76635	6.62481	7.50286	5.07102	16.9242	4.27497	2.50058	6.51966	10.043	24.0169	16.0041	18.0186	8.03332	5	7.05817	27.9319	8.06271	8.63164	8.66468	9.13102	16.5356	8.93773	7.17914	16.0676	6.50171	4.77251	10.0666	10.8732	9.38862
Fragilariopsis_cylindrus	4.77636	6.57825	7.27225	13.0324	8.33418	10.9419	9.46558	33.1891	0.753521	9.00782	2.66867	5.19696	6.34346	4.41654	8.25315	9.4176	9.40234	11.7562	6.66821	8.69289	13.0559	15.7611	16.0041	4.91416	25.8851	5	11.0914	11.558	6.04703	3.45266	12.275	5.47861	10.5227	6.25641	12.3071	8.50637	7.80206	7.95419	4.47406	3.9539	4.17272
Haemonchus_placei	13.3738	21.6143	5.19447	21.0523	22.919	8.75355	7.74457	6.63782	5.27465	17.1149	18.6807	6.4962	10.1495	7.72894	6.00229	7.24431	13.1633	11.7562	9.16878	10.8661	3.0129	24.0169	22.9624	16.3805	10.7111	3	13.108	28.8951	11.0862	17.2633	5.0544	22.8275	9.01943	12.5128	5.12796	8.50637	19.5051	24.658	21.2518	15.8156	8.34544
Musca_domestica	147.112	403.153	309.59	218.543	241.691	215.556	223.732	268.832	109.261	143.224	252.189	103.939	152.666	229.66	156.059	160.099	118.47	252.224	350.914	211.889	194.834	272.442	226.84	155.615	228.503	215	431.557	546.117	176.372	226.149	109.753	166.185	175.879	176.073	148.711	292.997	299.079	167.833	324.369	257.004	178.384
Megaselia_abdita	64.9585	116.529	47.7891	99.2465	93.7596	66.7458	80.8877	109.524	36.169	70.261	89.4003	49.3711	71.0467	40.853	52.52	81.1362	58.2945	64.1246	46.6774	69.5431	69.2966	96.0676	108.549	108.93	92.8294	36	52.4321	156.034	58.4546	93.2217	52.7102	73.0481	82.6781	50.0513	55.3819	75.6122	143.038	83.519	107.377	119.606	55.2886
Streptomyces_rubrolavendulae	88.8402	0	83.1115	0	59.3811	80.9703	0	36.508	59.5281	145.927	25.3523	148.113	153.512	130.288	78.78	70.2698	127.872	79.087	58.3468	107.574	0	0	0	0	52.6628	114	50.4155	0	133.035	89.7691	2.88823	0	108.233	0.893773	104.61	0.945152	33.8089	86.7006	15.6592	36.5736	1.04318
Jaculus_jaculus	9867	7162.78	8947.99	9043.46	8155	6928.43	7797.06	7835.95	8149.33	8584.45	7841.88	9822.25	10044.2	9911.81	8030.31	7140.71	10073.7	8917.6	7991.85	9453.51	8640.99	7776.22	7087.02	9265.64	9041.05	9843	7469.56	6604.46	9281.19	9372.23	8236.5	7867.28	9973.98	8337.11	9192.38	7978.98	7724.04	8615.18	7538.78	6918.34	8551.99
Tursiops_truncatus	588.447	742.403	659.697	627.559	744.868	763.747	628.17	696.972	465.676	683.694	705.862	575.563	614.892	616.107	572.468	715.738	541.575	707.508	610.974	548.738	552.364	899.883	878.136	570.861	682.832	611	714.892	858.184	591.601	718.152	522.769	532.338	553.192	547.883	554.845	589.775	886.834	759.625	807.567	802.643	558.102
Ladona_fulva	103.169	173.854	76.8781	115.286	133.347	77.6877	141.984	157.648	54.2535	82.872	158.786	40.2764	67.6635	47.4778	96.0366	76.7897	99.6648	65.1934	63.348	57.5904	125.537	240.92	150.995	147.425	114.252	83	109.906	437.279	59.4625	115.664	60.6528	85.8316	135.291	92.0586	56.4075	120.98	227.56	102.609	130.866	149.26	99.1021
Dufourea_novaeangliae	27.7029	30.072	27.0112	30.0747	28.1279	27.3548	27.5362	46.4648	24.8662	38.7336	46.7017	10.3939	21.5678	17.6662	20.2577	28.9772	26.3266	24.5811	20.0046	16.2992	37.1591	44.2812	54.2747	23.7518	23.2074	21	28.2327	94.3906	27.2116	46.6109	18.7735	32.8717	48.1036	22.3443	15.3839	17.0127	88.4233	50.1114	45.8591	35.5851	23.9931
Manihot_esculenta	21.9712	61.0838	22.8557	30.0747	62.5064	30.6374	34.4203	56.4215	8.28873	32.4282	54.7077	11.6932	24.1051	14.3537	29.2612	25.3551	35.7289	19.2374	33.341	18.4724	19.0817	72.0507	33.3998	51.5987	50.8777	21	34.2826	59.7165	22.1724	31.0739	18.0514	25.5668	55.6198	21.4505	31.7933	45.3673	87.123	27.8397	45.8591	42.5045	33.3818
Phylloscopus_trochilus	111.767	158.818	142.328	94.234	130.222	134.586	136.821	124.459	83.6408	100.888	156.117	80.5529	84.5794	103.789	134.301	107.216	101.545	105.806	138.365	134.74	108.464	153.858	270.677	88.4548	143.707	83	173.429	187.818	117.917	181.264	69.3175	99.5281	99.2137	96.5275	72.817	142.718	239.263	108.972	158.829	176.937	85.5408
Chlamydomonas_applanata	7.64217	4.69875	7.27225	3.00747	14.5848	3.28258	7.74457	4.97837	4.52112	14.4125	17.3463	3.89772	7.18925	2.20827	4.50172	8.69317	0	2.13749	4.16763	5.43305	1.0043	9.00634	13.2207	9.82832	4.46295	1	12.0997	2.88951	4.03135	15.537	3.61029	5.47861	6.01295	3.57509	6.15355	1.8903	18.2048	7.95419	6.71108	5.93086	1.04318
Manduca_sexta	34.3898	30.072	20.7779	24.0598	50.0051	30.6374	31.8388	49.7837	23.3591	20.718	42.6987	20.7878	33.8318	29.8116	28.5109	31.1505	63.9359	33.1311	20.8381	23.9054	35.1505	60.7928	48.708	38.4942	32.1333	31	40.3324	96.317	40.3135	41.4319	17.3294	31.9586	85.6846	25.0256	25.6398	35.9158	92.3243	34.9984	24.6073	35.5851	31.2954
Echinostoma_caproni	36.3003	55.4453	22.8557	35.0871	56.2557	14.2245	24.0942	49.7837	19.5915	60.3524	46.7017	12.9924	27.4883	8.83308	28.5109	24.6306	30.0875	18.1686	14.1699	18.4724	16.0688	108.827	56.3621	31.942	28.5629	15	27.2244	53.9375	20.1568	48.3372	16.6073	22.8275	52.6133	19.663	18.4606	23.6288	153.44	43.748	42.5035	31.6312	33.3818
Aegilops_tauschii	20.0607	12.2168	16.6223	20.0498	29.1696	17.5071	13.7681	31.5297	64.0493	45.0391	40.03	11.6932	15.2243	26.4992	24.0092	19.5596	22.5656	12.8249	15.0035	16.2992	19.0817	61.5433	29.9206	81.9026	15.174	9	13.108	88.6116	193.505	24.1686	7.94263	17.3489	75.1619	7.15018	21.5374	10.3967	54.6144	16.7038	21.2518	40.5275	27.1227
Serinus_canaria	324.792	733.945	281.54	439.091	585.476	423.453	481.884	477.923	339.084	217.989	773.913	231.265	265.579	282.658	606.231	372.357	302.755	271.461	69.1826	257.527	337.444	324.228	1115.41	163.805	231.181	252	449.707	1145.21	373.908	524.804	192.789	364.328	287.118	409.348	300.498	100.186	596.857	461.343	715.849	1029.99	339.034
Steinernema_carpocapsae	7.64217	3.759	2.07779	2.00498	6.25064	3.28258	5.16304	8.29728	2.26056	2.70235	4.003	0	5.07477	4.41654	2.25086	1.44886	3.76094	3.20623	0.833526	2.17322	7.03009	6.75476	9.04578	9.00929	0.892591	1	6.04986	148.328	4.03135	5.17898	1.44411	1.8262	4.50971	4.46886	3.07677	3.78061	11.7031	4.77251	2.23703	1.97695	12.5182
Mus_caroli	2175.15	1976.3	1973.9	2175.4	1938.74	1715.69	1787.27	2036.15	2066.91	2085.31	2324.41	2137.25	2255.31	2277.83	1941.74	2032.03	2139.97	1973.97	1866.26	2083.03	1884.06	1960.38	1775.76	2000.06	2265.39	2084	1877.47	2191.21	2127.55	2180.35	2262.2	2026.17	2304.46	1738.39	2052.21	2190.86	2116.96	2069.68	2168.8	1768.38	1958.05
Haliaeetus_albicilla	19.1054	25.3733	17.6612	12.0299	18.7519	17.5071	16.3496	23.2324	12.8099	35.1305	36.027	7.79544	13.1098	16.562	19.5074	18.8352	15.0437	14.9624	20.0046	14.1259	16.0688	35.2748	34.7914	9.00929	17.8518	12	29.241	40.4531	11.0862	22.4423	9.38674	18.262	16.5356	8.04396	11.2815	26.4643	41.611	15.9084	31.3184	26.6889	8.34544
2061766007_____rumenHiSeq_NODE_2849562_len_36835_cov_3_989847	9.55271	11.277	4.15557	19.0473	10.4177	22.9781	10.3261	4.97837	9.79577	5.40469	14.6777	10.3939	6.34346	4.41654	15.0057	4.34658	1.88047	9.61869	6.66821	0	11.0473	15.0106	14.6124	22.9327	24.9925	7	2.01662	26.0056	8.06271	8.63164	16.6073	5.47861	7.51619	8.93773	10.2559	15.1224	7.80206	1.59084	19.0147	8.89628	10.4318
Acanthisitta_chloris	93.6166	210.504	86.2282	99.2465	211.48	126.926	203.08	316.956	75.3521	125.209	325.577	66.2612	78.6589	44.1654	135.051	116.633	94.0234	103.668	130.03	91.2753	76.3267	322.727	210.836	169.538	154.418	86	139.147	365.041	109.854	170.906	98.9218	193.578	144.311	80.4396	47.1772	175.798	339.389	120.904	259.495	142.341	106.404
Harpegnathos_saltator	13.3738	23.4938	25.9723	24.0598	30.2114	16.4129	29.2572	23.2324	12.8099	34.2297	38.6957	20.7878	11.4182	7.72894	21.7583	17.3863	15.0437	10.6874	15.0035	11.9527	18.0774	58.5412	39.6622	31.942	16.9592	9	18.1496	133.881	19.1489	24.1686	7.22057	21.9144	22.5486	13.4066	11.2815	17.9579	53.3141	20.6809	25.7258	29.6543	15.6477
Drosophila_elegans	16.2396	47.9273	27.0112	39.0971	48.9633	32.8258	56.7935	49.7837	27.8803	29.7258	70.7197	11.6932	27.4883	20.9786	35.2634	32.5994	30.0875	25.6498	20.8381	22.8188	33.1419	63.7949	83.4995	31.123	37.4888	21	33.2742	67.4219	32.2508	46.6109	11.5529	31.9586	58.6263	28.6007	27.691	34.9706	80.6213	42.9526	54.8072	47.4468	33.3818
Drosophila_persimilis	6.6869	14.0963	12.4667	13.0324	21.8772	10.9419	9.46558	8.29728	8.28873	67.5587	13.3433	7.79544	7.18925	2.20827	6.75257	3.62215	13.1633	11.7562	5.83468	4.34644	2.0086	37.5264	331.215	6.55221	12.4963	4	5.04155	28.8951	10.0784	5.17898	5.77646	12.7834	7.51619	5.36264	7.17914	8.50637	54.6144	13.5221	8.94811	3.9539	9.38862
Lachnospiraceae_bacterium_TWA4	3.82109	11.277	6.23336	0	10.4177	55.8039	6.02355	19.9135	14.3169	1.80156	25.3523	24.6856	16.9159	22.0827	34.5132	40.5681	7.52187	1.06874	0	14.1259	8.03439	35.2748	34.0956	13.9234	22.3148	7	5.04155	65.4955	4.03135	10.358	5.77646	29.2193	18.0389	8.04396	16.4095	0	14.3038	16.7038	14.5407	13.8387	22.95
Eragrostis_tef	20.0607	31.0118	27.0112	22.0548	21.8772	14.2245	22.3732	31.5297	13.5634	39.6344	26.6867	10.3939	22.8364	15.4579	20.2577	32.5994	28.207	20.3061	14.1699	24.992	16.0688	128.34	64.7121	13.9234	26.7777	18	21.1745	22.1529	17.1333	31.0739	10.8309	23.7406	34.5745	16.0879	17.4351	17.0127	96.2254	20.6809	20.1333	22.7349	28.1659
Lanzia_echinophila	11.4633	38.5298	12.4667	30.0747	39.5874	13.1303	21.5127	34.8486	11.3028	30.6266	41.3643	16.8901	20.2991	11.0413	57.772	10.142	7.52187	18.1686	12.5029	17.3858	15.0645	38.2769	17.3957	27.8469	33.0259	7	25.2078	27.9319	8.06271	22.4423	15.8853	16.4358	21.0453	10.7253	17.4351	23.6288	62.4165	11.9313	29.0814	12.8502	13.5613
Marssonina_brunnea	14.3291	32.8913	4.15557	23.0573	18.7519	10.9419	13.7681	19.9135	5.27465	19.8172	14.6777	9.09468	4.65187	6.62481	9.75372	8.69317	1.88047	10.6874	8.33526	7.60627	12.0516	29.2706	13.2207	23.7518	27.6703	5	6.04986	42.3795	6.04703	18.9896	10.1088	17.3489	7.51619	8.93773	11.2815	18.903	32.5086	7.15877	30.1999	21.7465	3.12954
Ephydra_gracilis	28.6581	45.108	22.8557	34.0847	36.4621	27.3548	39.5833	64.7188	19.5915	30.6266	58.7107	14.2916	33.8318	19.8744	21.7583	28.2528	26.3266	23.5124	20.8381	20.6456	17.0731	48.0338	73.062	38.4942	37.4888	31	41.3407	104.022	30.2352	43.1582	18.0514	27.393	60.1295	19.663	22.563	41.5867	59.8158	34.203	41.385	48.4353	43.8136
3300018080_____Ga0180433_10001621	6.6869	28.1925	19.739	7.01743	21.8772	28.449	24.9547	26.5513	12.0563	10.8094	28.021	1.29924	7.61215	14.3537	19.5074	20.2841	3.76094	7.48121	20.8381	8.69289	20.086	23.2664	42.4456	15.5615	20.5296	15	32.2659	32.7478	8.06271	22.4423	18.7735	30.1324	7.51619	17.8755	11.2815	39.6964	23.4062	21.4763	20.1333	46.4584	19.8204
Mucor_circinelloides	11.4633	13.1565	3.11668	12.0299	14.5848	8.75355	4.30254	6.63782	6.02817	9.9086	4.003	7.79544	8.03504	1.10413	6.00229	9.4176	9.40234	3.20623	5.83468	4.34644	5.02149	7.50528	5.56663	9.82832	4.46295	4	7.05817	7.70536	9.07055	8.63164	7.94263	7.30481	9.01943	4.46886	8.20473	9.45152	5.20137	3.18168	4.47406	6.91933	9.38862
Euroglyphus_maynei	8.59744	15.9758	6.23336	8.01992	15.6266	3.28258	10.3261	19.9135	6.78169	11.7102	14.6777	6.4962	8.88084	3.3124	6.75257	6.51988	13.1633	9.61869	4.16763	2.17322	7.03009	20.2643	10.4374	19.6566	4.46295	4	12.0997	16.3739	6.04703	6.90531	7.94263	10.0441	16.5356	12.5128	11.2815	9.45152	15.6041	8.74961	16.7777	10.8732	14.6045
Blattella_germanica	167.172	466.116	202.584	286.712	306.281	279.019	317.527	414.864	123.577	250.417	422.984	165.003	166.199	155.683	277.606	223.849	208.732	169.93	146.701	159.732	224.963	468.33	1989.37	229.327	341.862	144	292.41	855.295	194.513	281.391	151.632	281.235	299.144	219.868	181.53	254.246	604.659	247.375	373.584	390.448	198.204
Monocercomonoides_sp._PA203	31.524	179.492	54.0225	112.279	217.731	85.3471	115.308	170.924	39.1831	129.713	240.18	85.7498	40.5981	37.5406	69.0263	64.4743	35.7289	52.3684	70.0162	58.677	66.2837	215.402	170.478	140.053	114.252	20	52.4321	187.818	48.3763	91.4954	88.813	147.922	55.6198	74.1831	82.0473	134.212	273.072	44.5435	228.177	85.9974	68.8499
Malassezia_sympodialis	2.86581	1.8795	1.03889	6.01494	15.6266	16.4129	12.0471	0	2.26056	4.50391	4.003	5.19696	2.11449	0	1.50057	84.034	0	10.6874	3.3341	1.08661	0	6.75476	0.695829	3.27611	123.178	4	5.04155	2.88951	16.1254	3.45266	0.722057	0	1.50324	4.46886	9.23032	0.945152	5.20137	2.38626	6.71108	17.7926	0
Pinctada_martensii	45.853	90.216	57.1391	56.1394	109.386	39.391	74.0036	102.886	26.3732	63.0548	116.087	31.1818	57.0911	37.5406	89.284	47.8124	67.6969	42.7497	46.6774	33.6849	34.1462	140.349	83.4995	54.8748	57.1258	39	54.4488	147.365	42.3292	103.58	36.8249	73.0481	79.6716	56.3077	60.5099	95.4604	188.55	67.6106	82.77	113.675	44.8568
Baeospora_myosura	27.7029	12.2168	6.23336	46.1145	39.5874	17.5071	11.1866	16.5946	12.8099	12.611	17.3463	18.1894	9.30374	192.119	159.061	25.3551	39.4898	3.20623	3.3341	3.25983	122.524	37.5264	15.3082	413.608	70.5147	29	6.04986	374.673	10.0784	34.5266	8.66468	10.0441	21.0453	9.8315	14.3583	11.3418	26.0069	83.519	19.0147	184.845	25.0363
Onchocerca_flexuosa	2.86581	8.45775	6.23336	9.02241	7.29241	2.18839	4.30254	9.95674	2.26056	7.20626	9.34033	5.19696	2.96028	1.10413	3.75143	7.96874	9.40234	1.06874	3.3341	2.17322	3.0129	4.50317	48.708	7.37124	7.14072	5	5.04155	23.1161	5.03919	13.8106	2.88823	4.56551	9.01943	3.57509	6.15355	5.67091	15.6041	8.74961	2.23703	6.91933	6.25908
Leptopilina_clavipes	21.9712	32.8913	20.7779	21.0523	36.4621	21.8839	18.9312	38.1675	12.0563	36.0313	32.024	19.4886	19.4533	18.7703	20.2577	23.9062	39.4898	20.3061	16.6705	15.2125	9.03869	39.0275	29.9206	28.6659	31.2407	11	27.2244	387.194	12.0941	31.0739	14.4411	34.6979	25.555	18.7692	16.4095	21.7385	61.1161	19.8855	42.5035	31.6312	25.0363
Nilaparvata_lugens	112.722	201.107	76.8781	168.418	160.433	115.984	130.797	187.519	61.7887	83.7728	202.819	48.0719	78.6589	65.1439	96.0366	84.034	103.426	89.7745	95.8555	76.0627	52.2235	268.689	200.399	159.71	120.5	77	107.889	542.265	79.6192	134.654	69.3175	121.443	139.801	105.465	65.6379	193.756	237.963	128.062	140.933	210.545	121.009
Mycobacterium_avium	32.4792	33.831	21.8168	33.0822	43.7545	35.0142	26.6757	34.8486	18.0845	50.4438	21.3493	25.9848	34.6776	23.1868	39.0149	21.7329	22.5656	18.1686	33.341	13.0393	38.1634	53.2875	18.0916	50.7796	32.1333	27	25.2078	40.4531	25.196	10.358	49.0999	22.8275	16.5356	24.1319	48.2028	33.0803	22.1058	11.1359	35.7924	10.8732	32.3386
Capsaspora_owczarzaki	4.77636	5.6385	18.7001	6.01494	7.29241	4.37677	6.88406	9.95674	1.50704	12.611	12.009	3.89772	7.61215	1.10413	27.0103	5.07102	3.76094	3.20623	5.00115	5.43305	11.0473	21.0148	15.3082	15.5615	6.24813	7	9.07479	2.88951	14.1097	6.90531	3.61029	6.39171	7.51619	9.8315	4.10237	2.83546	24.7065	223.513	7.8296	6.91933	3.12954
Talaromyces_wortmannii	0.955271	10.3373	1.03889	4.00996	4.16709	20.7897	7.74457	11.6162	3.7676	11.7102	10.6747	5.19696	7.61215	3.3124	3.75143	5.07102	16.9242	0	1.66705	0	3.0129	11.2579	11.1333	17.1996	0.892591	1	3.02493	13.4844	6.04703	17.2633	7.22057	6.39171	6.01295	3.57509	7.17914	7.56122	19.5051	3.18168	12.3037	1.97695	5.2159
Ananas_comosus	21.016	12.2168	23.8945	19.0473	28.1279	9.84774	16.3496	31.5297	14.3169	36.0313	29.3553	14.2916	25.7967	17.6662	21.008	27.5284	31.968	13.8937	6.66821	16.2992	11.0473	38.2769	32.0081	16.3805	22.3148	24	20.1662	21.1897	21.1646	24.1686	14.4411	15.5227	49.6069	8.93773	23.5886	17.0127	49.413	20.6809	22.3703	20.758	17.7341
Gossypium_arboreum	19.1054	14.0963	24.9334	18.0448	23.9608	6.56516	8.60507	29.8702	15.0704	19.8172	13.3433	7.79544	20.2991	16.562	20.2577	20.2841	20.6852	25.6498	15.837	15.2125	17.0731	36.0254	28.529	22.9327	20.5296	16	27.2244	31.7846	19.1489	43.1582	12.275	16.4358	37.5809	16.0879	5.12796	17.9579	42.9113	26.2488	16.7777	20.758	21.9068
Protopolystoma_xenopodis	67.8243	82.698	57.1391	87.2166	115.637	68.9342	67.1196	111.184	45.9648	54.0469	108.081	57.1665	49.9019	41.9571	69.7766	66.6476	60.175	61.9871	55.0127	47.8109	46.1977	92.315	86.9786	68.7982	62.4813	48	81.6732	142.549	54.4233	65.6005	57.7646	88.5709	73.6587	46.4762	57.4331	90.7346	106.628	69.9969	131.985	97.8591	68.8499
Calliphora_vicina	45.853	73.3005	35.3224	61.1519	69.7988	54.7097	52.4909	89.6106	33.9084	72.0626	85.3973	44.1741	85.8481	26.4992	39.7652	55.0567	78.9797	42.7497	29.1734	38.0314	60.2579	80.3065	66.1037	73.7124	43.7369	43	48.3989	131.954	64.5017	60.4215	49.8219	43.8289	102.22	53.6264	68.7146	58.5994	81.9216	62.0427	65.9923	85.9974	73.0226
Clostridium_botulinum	8.59744	3.759	11.4278	5.01245	10.4177	6.56516	6.88406	16.5946	4.52112	10.8094	13.3433	2.59848	5.49766	14.3537	12.7549	5.79545	7.52187	9.61869	15.0035	11.9527	8.03439	12.0085	13.9166	12.2854	19.637	16	13.108	4.81585	10.0784	12.0843	9.38674	7.30481	13.5291	14.3004	8.20473	11.3418	7.80206	7.95419	35.7924	11.8617	8.34544
Falco_cherrug	124.185	301.66	163.106	53.132	256.276	283.396	247.826	229.005	122.07	134.217	324.243	119.53	103.187	147.954	212.331	223.125	120.35	160.312	230.887	134.74	176.757	166.617	304.773	72.8933	152.633	77	251.069	402.605	134.043	189.896	114.085	126.008	145.814	130.491	141.532	288.271	334.188	128.062	337.791	324.22	90.7567
Onthophagus_taurus	17.1949	23.4938	11.4278	24.0598	40.6291	4.37677	24.9547	24.8918	7.53521	15.3133	33.3583	3.89772	18.6075	9.93721	18.0069	15.9375	15.0437	14.9624	13.3364	16.2992	17.0731	35.2748	37.5748	16.3805	18.7444	8	18.1496	304.362	21.1646	22.4423	15.1632	20.0882	42.0907	14.3004	16.4095	25.5191	48.1127	50.9068	33.5554	16.8041	23.9931
Caenorhabditis_latens	4.77636	7.518	2.07779	10.0249	11.4595	4.37677	6.02355	4.97837	2.26056	5.40469	14.6777	6.4962	2.96028	3.3124	6.75257	2.89772	3.76094	7.48121	5.83468	5.43305	0	21.0148	13.2207	6.55221	4.46295	3	5.04155	21.1897	4.03135	8.63164	1.44411	6.39171	4.50971	2.68132	8.20473	4.72576	19.5051	3.18168	4.47406	10.8732	10.4318
Miniopterus_natalensis	5064.85	4321.91	4449.58	4645.54	4343.15	4157.93	4050.41	4133.71	4085.59	5465.05	4239.18	5387.95	5329.35	4865.92	4188.1	3855.42	4853.49	4163.83	4185.97	4552.9	4194.96	4189.45	3429.04	5027.18	5374.29	4944	3986.86	3949.96	4685.44	4797.47	4213.92	3796.68	5085.45	4209.67	5055.14	4172.85	4663.03	4308.78	4116.13	3621.78	4345.89
Paenibacillus_lautus	2.86581	19.7348	14.5445	23.0573	11.4595	126.926	15.4891	18.254	50.4859	7.20626	38.6957	54.5681	40.5981	56.3109	91.5349	101.42	16.9242	12.8249	14.1699	32.5983	13.0559	81.0571	86.2828	29.4849	57.1258	8	16.133	151.218	10.0784	20.7159	6.49851	56.6123	42.0907	6.25641	39.9981	38.7512	36.4096	38.9755	29.0814	21.7465	54.2454
Adineta_vaga	29.6134	55.4453	30.1279	33.0822	45.838	25.1664	22.3732	44.8053	24.8662	55.8485	53.3733	28.5833	24.1051	14.3537	35.2634	24.6306	33.8484	24.5811	20.8381	18.4724	29.1247	48.0338	45.9247	34.3991	37.4888	17	26.2161	53.9375	20.1568	36.2529	19.4955	35.611	42.0907	32.1758	31.7933	26.4643	94.925	30.2259	44.7406	53.3777	44.8568
Agrobacterium_tumefaciens	3.82109	3.759	5.19447	4.00996	10.4177	31.7316	9.46558	16.5946	5.27465	18.0156	22.6837	3.89772	5.07477	13.2496	7.50286	24.6306	3.76094	11.7562	8.33526	4.34644	1.0043	8.25581	4.8708	17.1996	25.8851	9	6.04986	9.6317	5.03919	22.4423	5.77646	11.8703	7.51619	4.46886	17.4351	2.83546	20.8055	8.74961	23.4888	11.8617	9.38862
Nasonia_longicornis	5.73163	7.518	2.07779	21.0523	2.08355	1.09419	5.16304	31.5297	6.02817	22.5196	5.33733	1.29924	3.38318	2.20827	9.00343	2.89772	9.40234	7.48121	4.16763	0	13.0559	5.2537	3.47914	6.55221	8.03332	2	6.04986	21.1897	5.03919	10.358	3.61029	2.7393	9.01943	0.893773	12.3071	8.50637	15.6041	3.97709	1.11851	8.89628	2.08636
Burkholderia_sp._AU4i	2.86581	6.57825	12.4667	4.00996	11.4595	41.5793	11.1866	58.081	23.3591	2.70235	5.33733	3.89772	4.65187	9.93721	12.0046	8.69317	7.52187	3.20623	24.1722	7.60627	38.1634	8.25581	3.47914	6.55221	7.14072	4	5.04155	7.70536	6.04703	3.45266	11.5529	3.65241	4.50971	1.78755	7.17914	7.56122	13.0034	3.18168	3.35554	8.89628	9.38862
Aspergillus_ruber	5.73163	17.8553	4.15557	13.0324	8.33418	3.28258	9.46558	4.97837	7.53521	10.8094	8.006	1.29924	0.845794	2.20827	3.75143	2.89772	5.64141	5.34372	1.66705	1.08661	3.0129	22.5159	11.1333	13.9234	2.67777	0	6.04986	7.70536	3.02352	1.72633	9.38674	5.47861	0	5.36264	1.02559	2.83546	6.50171	6.36335	14.5407	10.8732	1.04318
Pantherophis_guttatus	237.863	385.298	234.79	299.744	454.213	331.541	275.362	462.988	157.486	268.433	448.336	193.587	226.673	170.037	312.119	252.826	199.33	268.255	261.727	248.834	250.07	486.342	6468.43	330.068	365.07	240	257.119	489.29	287.234	384.971	185.569	294.932	341.235	243.106	217.425	426.264	548.745	268.852	486.554	491.273	298.35
Schistosoma_curassoni	13.3738	5.6385	4.15557	10.0249	21.8772	10.9419	8.60507	13.2756	6.78169	8.10704	8.006	5.19696	8.45794	7.72894	12.0046	6.51988	13.1633	9.61869	2.50058	3.25983	7.03009	12.0085	14.6124	13.1044	8.03332	6	15.1247	24.0792	5.03919	10.358	3.61029	7.30481	19.5421	12.5128	3.07677	10.3967	31.2082	14.3175	13.4222	18.781	3.12954
Musa_itinerans	21.9712	44.1683	17.6612	11.0274	62.5064	22.9781	25.8152	56.4215	12.0563	27.0235	48.036	22.0871	18.6075	8.83308	24.0092	18.1108	9.40234	16.0312	11.6694	21.7322	24.1032	58.5412	38.9664	23.7518	25.8851	17	27.2244	49.1217	20.1568	20.7159	18.0514	32.8717	30.0648	25.9194	26.6654	17.9579	55.9147	16.7038	39.148	30.6428	19.8204
Paramecium_biaurelia	7.64217	15.9758	7.27225	3.00747	13.543	10.9419	6.02355	19.9135	10.5493	9.00782	17.3463	3.89772	8.88084	7.72894	17.2566	19.5596	9.40234	3.20623	4.16763	10.8661	7.03009	21.0148	20.8749	49.1416	7.14072	8	9.07479	26.9688	7.05487	13.8106	5.77646	8.21791	18.0389	9.8315	5.12796	12.287	33.8089	13.5221	11.1851	56.3431	11.475
Zeugodacus_cucurbitae	109.856	71.421	37.4002	45.112	68.757	47.0503	58.5145	84.6323	72.338	79.2688	54.7077	97.443	87.5397	35.3323	57.0217	39.8437	67.6969	61.9871	47.511	46.7243	37.1591	71.3002	43.8372	67.1602	58.911	52	47.3906	99.2065	51.3998	69.0531	38.9911	42.9158	81.1748	41.1136	68.7146	58.5994	81.9216	58.861	68.2293	59.3086	31.2954
Pantoea_vagans	9.55271	12.2168	1.03889	3.00747	6.25064	1.09419	17.2101	6.63782	131.866	0	2.66867	0	0.422897	1.10413	0	0	0	3.20623	0	0	6.02579	21.0148	14.6124	21.2947	2.67777	1	2.01662	11.558	2.01568	3.45266	13.7191	5.47861	0	5.36264	1.02559	13.2321	1.30034	0.795419	0	3.9539	3.12954
Pseudomonas_tolaasii	13.3738	42.2888	365710	28.0697	16.6684	26.2606	30.9783	11.6162	36.9225	24.3211	14.6777	20.7878	8.88084	321937	65776.1	19.5596	5.64141	376568	431204	341730	22.0946	46.5328	44.533	26.2088	510711	284368	537186	35.6373	13.1019	12.0843	31.7705	22.8275	19.5421	19.663	13.3327	25.5191	26.0069	1.59084	26.8443	10.8732	21.9068
Drosophila_arizonae	7.64217	19.7348	10.3889	7.01743	23.9608	12.0361	17.2101	6.63782	4.52112	24.3211	22.6837	10.3939	11.4182	6.62481	8.25315	8.69317	13.1633	14.9624	14.1699	15.2125	13.0559	24.0169	208.749	10.6473	13.3889	10	18.1496	17.3371	9.07055	8.63164	8.66468	10.0441	22.5486	5.36264	3.07677	10.3967	48.1127	11.1359	12.3037	8.89628	14.6045
Ficedula_albicollis	4975.05	10681.2	4839.17	5958.8	8257.09	7668.11	8935.51	8795.12	4386.24	3662.58	8609.12	3407.91	4690.35	4363.54	8778.35	7040.02	4159.6	5072.26	5160.36	4618.1	6823.21	7023.44	6477.47	4548.87	5380.54	3914	7119.68	13513.3	5571.33	6725.77	3891.17	4782.83	3559.67	5965.04	5223.34	7188.83	8765.61	10602.1	11820.5	15743.5	5826.16
Arabidopsis_thaliana	12.4185	15.036	9.35004	11.0274	18.7519	6.56516	10.3261	24.8918	7.53521	9.00782	13.3433	9.09468	11.8411	11.0413	10.504	8.69317	0	11.7562	4.16763	3.25983	10.043	9.75687	10.4374	9.82832	8.03332	15	18.1496	23.1161	10.0784	17.2633	12.275	6.39171	16.5356	10.7253	8.20473	14.1773	20.8055	7.95419	20.1333	4.94238	12.5182
Mytilus_galloprovincialis	122.275	187.95	105.967	133.331	234.399	112.702	135.1	227.345	67.8169	160.339	282.879	92.246	149.706	81.7059	148.557	129.673	173.003	125.043	115.86	103.228	105.451	249.926	179.524	174.453	156.203	104	170.404	303.398	124.972	193.349	104.698	156.14	302.151	121.553	141.532	159.731	358.895	147.948	194.621	198.684	135.613
Pampus_argenteus	50.6294	151.3	83.1115	101.251	94.8013	87.5355	111.005	155.989	62.5422	62.154	138.771	68.8597	55.8224	87.2266	86.2829	93.4516	94.0234	66.2621	57.5133	53.2439	65.2794	92.315	96.0244	66.3411	82.1183	80	105.873	186.855	70.5487	107.032	59.2087	75.7874	103.723	85.8022	54.3564	60.4898	169.045	60.4518	142.051	144.317	60.5045
Euglossa_dilemma	21.9712	57.3248	18.7001	30.0747	34.3785	20.7897	30.1178	39.8269	16.5775	25.2219	57.3763	14.2916	23.2593	12.1455	24.7594	26.8039	37.6094	20.3061	19.1711	19.559	33.1419	56.2896	64.0163	40.1323	22.3148	17	29.241	135.807	15.1176	44.8845	16.6073	23.7406	33.0712	30.3883	18.4606	40.6416	65.0171	40.5664	49.2146	64.2509	25.0363
Chironomus_tentans	39.1661	27.2528	30.1279	27.0672	35.4203	14.2245	31.8388	34.8486	111.521	18.0156	36.027	12.9924	21.5678	22.0827	20.2577	15.213	41.3703	33.1311	29.1734	20.6456	36.1548	29.2706	29.2248	32.7611	18.7444	40	20.1662	35.6373	22.1724	41.4319	14.4411	21.9144	30.0648	20.5568	21.5374	22.6837	42.9113	49.316	12.3037	21.7465	30.2522
Bordetella_pertussis	2.86581	2.81925	3.11668	44.1096	3.12532	0	2.58152	1.65946	3.7676	0.900782	1.33433	0	7.61215	3.3124	3.00114	2.89772	7.52187	2.13749	63.348	5.43305	4.0172	0.750528	1.39166	2.45708	2.67777	1	2.01662	4.81585	5.03919	10.358	2.88823	2.7393	0	0	7.17914	82.2283	2.60069	2.38626	3.35554	2.96543	3.12954
Dracunculus_medinensis	8.59744	14.0963	5.19447	18.0448	11.4595	7.65935	9.46558	14.9351	5.27465	14.4125	22.6837	5.19696	6.34346	1.10413	7.50286	10.8665	11.2828	5.34372	2.50058	7.60627	10.043	18.0127	20.8749	20.4757	9.8185	3	12.0997	52.9743	5.03919	20.7159	8.66468	15.5227	15.0324	6.25641	9.23032	11.3418	15.6041	11.9313	21.2518	19.7695	13.5613
Clunio_marinus	127.051	274.407	185.962	179.446	147.932	137.868	158.333	160.967	82.1338	101.788	140.105	63.6627	169.582	110.413	141.054	123.153	94.0234	157.105	182.542	174.944	119.512	179.376	19067.1	152.339	189.229	136	214.77	452.69	129.003	129.475	78.7042	105.92	102.22	127.81	127.173	188.085	263.97	178.969	204.688	264.912	127.268
Toxocara_canis	16.2396	26.313	9.35004	25.0622	23.9608	10.9419	17.2101	46.4648	10.5493	45.9399	41.3643	15.5909	13.9556	8.83308	15.756	14.4886	20.6852	23.5124	10.8358	9.7795	23.0989	48.0338	39.6622	32.7611	21.4222	4	18.1496	60.6797	12.0941	24.1686	13.7191	16.4358	16.5356	10.7253	9.23032	34.0255	52.0137	14.3175	49.2146	14.8271	12.5182
Eidolon_helvum	1677.46	1561.87	1652.88	1801.47	1505.36	1421.36	1411.23	1690.99	1411.34	1725.9	1501.12	1807.24	1768.98	1582.22	1483.32	1437.27	1746.96	1515.48	1457	1575.59	1638.01	1677.43	1537.78	1635.6	1817.31	1682	1444.91	1472.69	1654.87	1762.58	1592.14	1422.61	1827.94	1603.43	1580.44	1463.1	1704.75	1571.75	1373.54	1386.83	1613.8
Meriones_unguiculatus	1919.14	2076.85	2014.41	2120.27	2205.43	1748.52	1945.61	2223.67	1531.91	1997.94	2223	2164.53	1962.24	1934.44	2010.02	1585.05	1976.37	1714.26	1890.44	1678.81	1984.49	2318.38	1865.52	2385.82	2550.13	1983	1832.1	2188.32	2020.72	2251.13	1971.22	1891.95	2178.19	1785.76	1893.24	2265.53	2343.22	1780.94	1935.03	1815.83	2133.3
Delftia_sp._670	20.0607	6.57825	17.6612	0	31.2532	44.8619	8.60507	87.9512	15.0704	38.7336	54.7077	22.0871	10.9953	17.6662	14.2554	47.8124	18.8047	22.4436	33.341	27.1653	2.0086	3.75264	2.78332	5.73318	57.1258	23	23.1911	2.88951	16.1254	46.6109	10.8309	1.8262	31.568	0.893773	24.6142	0.945152	70.2185	16.7038	41.385	34.5967	1.04318
Protostelium_mycophagum	4.77636	8.45775	1.03889	7.01743	15.6266	9.84774	6.02355	13.2756	3.01408	9.00782	6.67167	5.19696	3.80607	3.3124	203.328	8.69317	3.76094	5.34372	6.66821	3.25983	7.03009	7.50528	11.1333	3.27611	9.8185	1	4.03324	5.77902	4.03135	3.45266	2.16617	10.9572	4.50971	4.46886	2.05118	5.67091	9.1024	11.1359	7.8296	3.9539	4.17272
Ceratotherium_simum	4054.17	3452.64	3770.14	3848.56	3614.95	3158.94	3351.68	3471.58	3587.51	3809.41	3614.71	3863.94	4125.36	4268.58	3518.09	3284.57	4325.08	3813.28	3474.97	3963.96	3661.67	3303.83	3284.31	3517.72	3785.48	4249	3413.13	3366.28	4139.19	4065.5	3498.37	3277.12	4216.58	3549.17	3691.1	3452.64	3893.23	3815.62	3421.53	3199.7	3681.38
Proteus_phage_VB_PmiS-Isfahan	127.051	244.335	95.5782	158.393	293.78	252.759	189.312	237.302	120.563	110.796	254.858	105.238	75.2757	68.4563	217.583	299.914	114.709	180.618	130.864	84.7556	187.804	279.197	372.964	140.873	132.103	82	185.529	305.325	150.168	188.17	161.019	175.316	84.1813	130.491	77.945	239.124	283.475	331.69	267.325	565.408	142.916
Zostera_marina	17.1949	56.385	25.9723	31.0772	57.2975	31.7316	40.4438	51.4431	15.8239	39.6344	36.027	23.3863	21.1449	8.83308	41.2657	35.4971	16.9242	13.8937	21.6717	21.7322	28.1204	65.296	29.9206	36.8562	46.4147	14	23.1911	64.5324	17.1333	25.8949	23.8279	41.0896	30.0648	12.5128	30.7677	26.4643	75.4199	15.113	62.6368	27.6773	15.6477
Brassica_juncea	19.1054	15.9758	10.3889	18.0448	34.3785	10.9419	16.3496	31.5297	6.02817	23.4203	24.018	12.9924	19.4533	12.1455	24.0092	17.3863	54.5336	14.9624	15.837	8.69289	25.1075	35.2748	31.3123	37.6752	13.3889	18	11.0914	146.402	23.1803	27.6212	18.7735	8.21791	43.5939	22.3443	9.23032	13.2321	39.0103	27.8397	24.6073	19.7695	17.7341
Aquabacterium_parvum	0.955271	4.69875	3.11668	3.00747	4.16709	7.65935	1.72101	4.97837	3.01408	5.40469	6.67167	0	0	1.10413	3.75143	7.96874	0	2.13749	4.16763	2.17322	0	1.50106	0.695829	1.63805	5.35554	2	2.01662	0	0	0	4.33234	0	1.50324	0	4.10237	0	5.20137	198.855	8.94811	1.97695	1.04318
Macaca_fascicularis	9172.52	6123.41	10141.7	6172.33	10053.1	11388.4	6760.15	9968.35	8704.67	14224.3	8639.81	13908.4	14081.2	11261.1	9455.1	9834.15	10464.8	10361.5	11913.6	10767.2	5579.88	6988.92	5302.22	7829.89	12896.1	11709	8873.13	5447.69	12421.6	11238.4	7632.87	6442.85	11205.1	5974.87	13532.7	8514.88	9335.16	9330.26	8837.38	7119	5810.51
Caenorhabditis_japonica	12.4185	28.1925	12.4667	10.0249	19.7937	10.9419	13.7681	21.5729	13.5634	22.5196	9.34033	5.19696	15.6472	7.72894	9.00343	13.0398	13.1633	14.9624	6.66821	4.34644	14.0602	17.2622	86.2828	14.7425	13.3889	7	15.1247	27.9319	18.1411	12.0843	9.38674	8.21791	24.0518	15.1941	10.2559	17.0127	18.2048	19.0901	15.6592	13.8387	12.5182
Chlorella_sorokiniana	7.64217	0.93975	54.0225	7.01743	32.295	28.449	2.58152	8.29728	1.50704	41.436	16.012	31.1818	42.7126	77.2894	32.2623	21.7329	37.6094	29.9248	55.0127	33.6849	6.02579	12.759	17.3957	9.00929	49.9851	79	37.3075	11.558	19.1489	24.1686	0.722057	3.65241	9.01943	5.36264	33.8445	0.945152	49.413	24.658	12.3037	20.758	2.08636
Fopius_arisanus	9.55271	7.518	10.3889	10.0249	13.543	4.37677	7.74457	3.31891	5.27465	24.3211	13.3433	7.79544	5.07477	3.3124	4.50172	5.07102	5.64141	4.27497	5.00115	7.60627	5.02149	21.7653	15.3082	8.19026	18.7444	5	3.02493	18.3002	10.0784	5.17898	3.61029	15.5227	9.01943	9.8315	4.10237	8.50637	24.7065	18.2946	15.6592	9.88476	7.30226
Triops_cancriformis	72.6006	152.24	52.9836	121.301	114.595	103.948	118.75	96.2485	33.9084	86.4751	114.753	63.6627	62.5888	37.5406	116.294	89.8294	54.5336	41.681	63.348	26.0787	86.3697	150.856	82.1078	131.863	120.5	49	80.6648	362.152	63.4938	77.6848	49.8219	35.611	81.1748	81.3333	109.738	180.524	144.338	69.9969	184.555	180.891	74.0658
Cutibacterium_acnes	63.0479	80.8185	36.3613	49.122	128.138	49.2387	68.8406	109.524	55.007	27.0235	32.024	18.1894	22.4135	27.6034	50.2692	55.0567	39.4898	105.806	73.3503	44.551	39.1677	81.8076	57.7538	130.225	152.633	53	91.7563	58.7534	92.7211	32.8002	77.2601	52.0468	34.5745	42.0073	22.563	51.0382	53.3141	42.9526	61.5183	2391.12	50.0727
Saccharomycopsis_fibuligera_x_Saccharomycopsis_cf._fibuligera	32.4792	48.867	44.6724	26.0647	51.0469	40.4851	31.8388	44.8053	17.331	18.0156	32.024	10.3939	13.9556	24.291	39.0149	37.6704	9.40234	35.2685	36.6751	36.9448	26.1118	36.7759	50.7955	27.0279	26.7777	30	48.3989	57.7902	21.1646	20.7159	15.8853	18.262	18.0389	19.663	12.3071	30.2449	48.1127	43.748	30.1999	58.3201	21.9068
Mandrillus_leucophaeus	13519	16929.6	12885.4	13748.1	17962.3	17471	14843.8	35718.1	13011	15726.8	16846	14261.8	13312.4	13819.3	14688.3	15480.4	12762.7	14371.4	42721.5	13354.4	13342.1	16551.4	13541.5	17353.5	20727.7	13803	14564	16823.7	15350.4	15293.5	14318.4	13695.6	14357.4	12834.6	15076.2	15360.6	18139.8	12809.4	18354.8	15524	11837
Zonotrichia_albicollis	99.3482	215.203	127.784	107.266	183.352	168.506	129.076	204.113	73.0915	122.506	200.15	81.8521	111.222	88.3308	144.805	144.162	112.828	81.2245	86.6867	123.874	100.43	150.856	1175.25	110.569	110.681	97	168.388	277.393	91.7133	139.833	74.3719	134.226	123.266	96.5275	85.1241	136.102	265.27	179.765	209.162	228.338	113.707
Scartelaos_histophorus	65.9137	91.1558	70.6448	97.2415	116.679	45.9561	82.6087	126.119	43.7042	71.1618	122.759	67.5605	68.5093	50.7902	69.7766	49.9857	95.9039	71.6058	47.511	52.1573	53.2278	102.072	74.4537	75.3504	54.448	56	76.6316	150.254	57.4468	103.58	49.0999	63.004	115.749	50.9451	39.9981	89.7895	130.034	75.5648	101.785	85.0089	68.8499
Drosophila_nasuta	21.9712	26.313	12.4667	19.0473	20.8355	14.2245	20.6522	24.8918	12.8099	18.0156	17.3463	16.8901	10.9953	11.0413	20.2577	9.4176	11.2828	16.0312	19.1711	10.8661	11.0473	26.2685	48.0122	26.2088	25.8851	8	19.1579	42.3795	13.1019	15.537	6.49851	11.8703	21.0453	11.619	20.5118	20.7934	18.2048	11.1359	12.3037	14.8271	14.6045
Serratia_liquefaciens	5.73163	6.57825	13.5056	7.01743	28.1279	7.65935	1.72101	53.1026	2.26056	11.7102	6.67167	10.3939	2.11449	2.20827	6.00229	7.24431	15.0437	11.7562	9.16878	2.17322	5.02149	0.750528	2.78332	8.19026	15.174	8	10.0831	1.92634	8.06271	12.0843	5.77646	2.7393	3.00648	4.46886	11.2815	18.903	11.7031	4.77251	49.2146	63.2625	1.04318
Penicillium_paxilli	8.59744	13.1565	3.11668	10.0249	14.5848	4.37677	8.60507	1.65946	2.26056	7.20626	6.67167	6.4962	1.26869	2.20827	11.2543	8.69317	1.88047	2.13749	9.16878	3.25983	8.03439	10.5074	9.7416	4.91416	1.78518	2	11.0914	15.4107	10.0784	8.63164	3.61029	3.65241	9.01943	3.57509	6.15355	10.3967	6.50171	7.15877	11.1851	13.8387	5.2159
Glossina_morsitans	5016.13	11803.3	6393.35	7091.61	8342.52	11160.8	9251.31	8068.28	4247.6	6064.07	8900	5322.98	5568.29	5676.36	8944.91	8903.98	3870	5827.86	7685.11	6023.08	6713.74	7876.8	6097.55	4801.13	6503.42	4663	9820.94	15779.6	5480.63	6242.4	3571.29	4350.93	3510.06	6634.48	6116.63	10791.7	8193.46	8733.7	13121.3	14894.4	5731.23
Pseudonocardia_sp._Ae717_Ps2	61.1374	0.93975	49.8669	0	56.2557	45.9561	0.860507	39.8269	37.676	78.3681	25.3523	110.435	91.3458	66.2481	53.2703	39.1193	82.7406	35.2685	34.1746	47.8109	0	0	0.695829	1.63805	40.1666	61	38.3158	0	76.5957	55.2425	4.33234	0	85.6846	3.57509	72.817	0.945152	15.6041	38.1801	12.3037	12.8502	0
Phylloscopus_plumbeitarsus	120.364	388.117	189.079	247.615	645.899	207.897	251.268	575.831	126.591	263.028	741.889	193.587	104.878	109.309	293.362	157.926	127.872	115.424	260.06	134.74	311.333	478.837	617.2	366.924	274.025	87	278.294	344.815	144.121	265.854	210.841	529.599	210.453	344.103	211.272	363.884	505.833	147.948	535.768	540.696	355.725
Trichomalopsis_sarcophagae	14.3291	38.5298	19.739	24.0598	29.1696	31.7316	25.8152	44.8053	9.79577	26.1227	60.045	18.1894	13.9556	18.7703	23.2589	26.0795	24.4461	16.0312	21.6717	18.4724	17.0731	39.0275	41.0539	26.2088	34.811	17	25.2078	213.824	20.1568	34.5266	14.4411	26.4799	22.5486	11.619	6.15355	31.19	54.6144	32.6122	52.5702	43.4929	17.7341
Methylobacterium_brachiatum	16.2396	2.81925	10.3889	5.01245	32.295	44.8619	17.2101	71.3566	33.1549	41.436	58.7107	25.9848	19.0304	5.52067	16.5063	45.6391	22.5656	19.2374	21.6717	17.3858	4.0172	6.00423	9.7416	25.3898	38.3814	16	21.1745	2.88951	22.1724	27.6212	32.4926	10.9572	13.5291	1.78755	28.7166	4.72576	92.3243	32.6122	41.385	49.4238	3.12954
Ovis_aries	1469.21	1322.23	1399.39	1273.16	1343.89	1285.68	1237.41	1393.94	1263.65	1698.88	1397.05	1429.16	1505.51	1353.67	1237.22	1204.73	1485.57	1389.37	1251.96	1464.75	1263.41	1543.09	1317.9	1338.29	1290.69	1381	1268.45	1525.66	1444.23	1458.75	1177.68	1264.65	1438.6	1262.9	1280.96	1505.63	1767.17	1454.03	1386.96	1325.55	1338.4
Miichthys_miiuy	53.4952	52.626	42.5946	59.1469	62.5064	29.5432	60.2355	77.9944	31.6479	63.0548	54.7077	24.6856	38.0607	36.4364	33.7629	39.8437	45.1312	54.5059	77.5179	41.2912	42.1806	77.3044	55.6663	51.5987	51.7703	34	46.3823	83.7958	48.3763	67.3268	39.7131	52.9599	54.1166	35.7509	45.126	48.2028	83.2219	57.2702	50.3331	49.4238	45.8999
Erinaceus_europaeus	6778.61	5586.82	5738.85	6655.53	6333.98	5362.64	6114.77	5912.64	5004.88	6262.24	6072.55	6332.49	6729.98	6032.99	5827.47	5349.92	6756.52	6398.57	5888.86	6447.95	6270.84	6296.18	5381.54	6629.2	7072	6678	5434.79	5271.43	6144.79	7003.71	5043.57	5723.32	6717.97	5573.57	6530.97	5600.03	6540.72	5688.84	5901.28	5765.78	5927.35
Methylobacterium_sp._Leaf361	24.8371	11.277	20.7779	2.00498	58.3393	83.1587	24.0942	89.6106	39.1831	56.7493	73.3883	24.6856	16.9159	5.52067	21.7583	68.0965	18.8047	29.9248	29.1734	14.1259	3.0129	7.50528	24.354	29.4849	41.9518	25	22.1828	2.88951	14.1097	37.9792	36.1029	10.9572	21.0453	3.57509	29.7422	1.8903	76.7202	26.2488	52.5702	36.5736	11.475
Vanrija_humicola	9.55271	1.8795	5.19447	2.00498	15.6266	5.47097	6.88406	6.63782	15.0704	13.5117	5.33733	7.79544	10.9953	4.41654	9.75372	5.79545	9.40234	8.54995	5.00115	9.7795	0	23.2664	2.78332	7.37124	2.67777	8	2.01662	1.92634	13.1019	6.90531	11.5529	3.65241	7.51619	2.68132	18.4606	0	28.6075	11.1359	1.11851	1.97695	4.17272
Mycolicibacterium_fortuitum	80.2428	162.577	179.729	77.1917	190.644	215.556	123.913	199.135	74.5986	108.094	148.111	66.2612	201.299	196.536	170.315	116.633	13.1633	165.655	274.23	143.433	31.1333	93.816	93.9369	68.7982	94.6146	175	208.72	214.787	143.113	179.538	83.0366	53.873	94.704	65.2454	156.916	28.3546	152.14	79.5419	325.488	85.9974	95.9726
Meloidogyne_hapla	5.73163	5.6385	3.11668	5.01245	10.4177	5.47097	6.02355	3.31891	7.53521	8.10704	8.006	5.19696	5.49766	1.10413	1.50057	3.62215	11.2828	3.20623	4.16763	5.43305	7.03009	13.5095	11.1333	8.19026	3.57036	4	7.05817	15.4107	4.03135	6.90531	1.44411	1.8262	13.5291	6.25641	4.10237	1.8903	13.0034	5.56793	5.59257	7.90781	11.475
Ophionereis_fasciata	52.5399	78.939	31.1668	56.1394	112.511	75.4993	76.5852	94.589	37.676	64.8563	106.747	31.1818	47.3645	39.7488	58.5223	85.4828	60.175	71.6058	52.5121	47.8109	53.2278	127.59	782.807	68.7982	82.1183	50	76.6316	142.549	92.7211	72.5058	47.6558	67.5695	124.769	53.6264	33.8445	75.6122	149.539	62.8381	77.1775	149.26	50.0727
Nomascus_leucogenys	205679	310986	200935	252136	273426	333778	266695	288561	190457	299290	283679	262491	237787	198011	244890	278494	191610	213890	256460	203945	219405	280086	250420	254959	298961	201838	243043	356127	230326	230753	228086	217072	213858	219991	276748	290224	287762	208945	342802	303342	191598
Mesorhizobium_sp._LSHC416B00	552.147	1609.79	1086.68	57.1419	1461.61	746.24	1376.81	1181.53	456.634	195.47	1765.32	252.052	754.026	1459.67	2000.26	557.087	665.686	25.6498	41.6763	990.989	969.148	1116.79	720.879	450.464	1899.43	1383	2033.76	1995.69	49.3841	1089.31	277.27	469.334	705.019	962.593	822.524	49.1479	1717.75	285.555	2455.14	921.26	805.335
Emiliania_huxleyi	18.1502	50.7465	27.0112	28.0697	17.7101	30.6374	16.3496	21.5729	26.3732	45.9399	25.3523	15.5909	30.0257	9.93721	16.5063	21.0085	24.4461	17.0999	18.3376	20.6456	19.0817	28.5201	11.8291	31.123	41.9518	14	24.1995	42.3795	13.1019	32.8002	28.8823	16.4358	18.0389	11.619	15.3839	18.903	55.9147	10.3404	40.2665	31.6312	9.38862
Apaloderma_vittatum	136.604	300.72	137.134	211.525	287.529	237.44	228.034	283.767	131.113	189.164	265.532	132.522	137.442	129.184	194.324	217.329	165.481	173.136	171.706	146.692	159.684	307.717	237.278	230.965	188.337	134	202.67	404.531	151.176	207.159	155.242	199.969	193.918	158.198	159.992	270.314	377.099	213.172	296.406	327.186	184.643
Emergomyces_orientalis	7.64217	13.1565	9.35004	15.0373	17.7101	9.84774	13.7681	18.254	3.7676	8.10704	30.6897	10.3939	5.92056	12.1455	21.7583	15.213	11.2828	13.8937	10.0023	6.51966	15.0645	21.7653	19.4832	18.0186	15.174	7	8.06648	19.2634	10.0784	10.358	7.22057	7.30481	13.5291	9.8315	9.23032	25.5191	19.5051	9.54503	33.5554	19.7695	13.5613
Monopterus_albus	140.425	262.19	174.534	152.378	216.689	166.317	191.033	315.297	180.091	245.013	198.816	123.428	128.138	91.6432	229.588	215.156	163.601	126.112	187.543	116.267	155.666	251.427	280.419	190.014	117.822	119	202.67	346.741	111.87	236.507	177.626	223.71	233.002	190.374	152.813	250.465	370.598	164.652	178.962	216.476	181.513
Chenopodium_pallidicaule	4.77636	26.313	9.35004	20.0498	23.9608	19.6955	18.0707	16.5946	10.5493	20.718	13.3433	7.79544	23.2593	12.1455	13.5051	13.7642	35.7289	10.6874	14.1699	15.2125	18.0774	30.7717	20.8749	14.7425	16.9592	19	12.0997	21.1897	14.1097	17.2633	5.77646	13.6965	34.5745	11.619	13.3327	7.56122	37.7099	16.7038	14.5407	16.8041	14.6045
Schistocephalus_solidus	41.0767	32.8913	19.739	17.0423	47.9216	36.1084	33.5598	56.4215	24.8662	41.436	52.039	35.0795	23.2593	24.291	27.0103	26.8039	37.6094	23.5124	27.5064	34.7715	19.0817	66.797	49.4038	36.8562	34.811	27	50.4155	99.2065	29.2273	51.7898	17.3294	24.6537	37.5809	29.4945	32.8189	43.477	74.1195	27.0442	35.7924	42.5045	36.5113
Variovorax_paradoxus	9.55271	4.69875	9.35004	1.00249	23.9608	21.8839	9.46558	21.5729	4.52112	29.7258	21.3493	16.8901	5.07477	7.72894	12.7549	19.5596	11.2828	7.48121	10.8358	8.69289	2.0086	6.75476	2.08749	6.55221	24.9925	14	13.108	1.92634	12.0941	12.0843	6.49851	0.913102	6.01295	3.57509	23.5886	1.8903	35.1093	9.54503	25.7258	16.8041	2.08636
Rhinolophus_sinicus	3139.02	2625.66	2993.05	2773.89	3040.94	2908.37	2473.1	2676.7	2433.12	3512.15	2682.01	3448.18	3871.62	3036.37	2821.08	3091.15	3508.95	3432.8	2714.79	3581.47	2466.56	2471.49	2165.42	2647.09	2860.75	3083	2782.94	2574.55	3235.16	3288.65	2356.07	2528.38	3483	2522.23	3626.49	2290.1	2988.19	3265.19	2829.84	2712.38	2652.81
Corynebacterium_afermentans	0.955271	2.81925	4.15557	1.00249	7.29241	6.56516	1.72101	157.648	3.7676	2.70235	12.009	9.09468	1.69159	1.10413	3.00114	3.62215	3.76094	7.48121	12.5029	5.43305	0	3.00211	0	5.73318	23.2074	4	1.00831	0.96317	3.02352	5.17898	3.61029	0	1.50324	1.78755	3.07677	0	5.20137	3.18168	8.94811	8.89628	0
Camelus_ferus	1640.2	2331.52	986.949	1523.78	1233.46	4166.69	1893.12	1208.08	1.77526e+06	3539.17	1302.31	3363.73	1272.07	1052.24	1437.55	3390.34	1038.02	908.432	1029.4	1021.41	1749.49	1880.07	2.0628e+06	1579.9	1114.85	1029	1067.8	2826.9	1046.14	1211.88	1.62618e+06	1.52124e+06	886.91	1749.11	1312.76	1881.8	1279.54	1194.72	1503.28	1279.09	1779.67
Solanum_commersonii	69.7348	109.951	62.3336	93.2316	136.472	91.9122	94.6558	127.778	41.4436	67.5587	130.765	48.0719	57.9369	30.9158	78.0297	115.184	63.9359	83.362	77.5179	57.5904	81.3482	159.112	154.474	79.4455	50.8777	29	109.906	197.45	61.4782	103.58	50.544	79.4398	109.736	71.5018	64.6123	132.321	154.741	108.972	130.866	142.341	79.2817
Cladonia_macilenta	47.7636	162.577	55.0614	86.2141	93.7596	99.5716	123.913	121.14	76.8591	63.0548	172.129	36.3787	24.528	71.7687	94.536	102.869	52.6531	59.8496	119.194	61.9368	94.4041	98.3192	116.203	37.6752	86.5813	83	140.155	264.872	58.4546	120.843	54.8763	22.8275	64.6392	73.2894	69.7402	183.36	180.748	59.6564	154.355	142.341	23.9931
Pseudotsuga_menziesii	629.524	897.462	550.614	716.78	1063.65	818.457	813.179	1047.12	456.634	926.004	1039.45	523.594	640.266	451.591	683.511	784.558	739.024	624.146	521.787	445.51	703.009	1331.44	1185.69	945.975	900.624	448	725.984	1385.04	662.15	889.059	558.872	696.697	1131.94	538.945	572.28	727.767	1512.3	704.741	975.344	843.17	638.426
Streptomyces_sp._TLI_105	15.2843	0	6.23336	0	5.20887	16.4129	0	6.63782	0.753521	10.8094	6.67167	6.4962	85.8481	4.41654	16.5063	49.2613	71.4578	80.1558	13.3364	70.6297	0	0.750528	0.695829	0	7.14072	4	2.01662	0	12.0941	24.1686	0	0	52.6133	0	22.563	0	23.4062	31.0213	64.8738	5.93086	1.04318
Delftia_sp._HK171	33.4345	2.81925	65.4503	3.00747	135.43	144.434	21.5127	243.94	21.0986	119.804	166.792	57.1665	42.2897	38.6447	54.0206	136.193	63.9359	76.9495	85.8532	61.9368	2.0086	9.00634	3.47914	9.00929	166.022	61	78.6482	2.88951	40.3135	120.843	24.5499	2.7393	106.73	3.57509	64.6123	2.83546	224.959	45.3389	111.851	104.778	4.17272
Aplysia_californica	104.125	146.601	134.017	131.326	151.057	100.666	123.913	127.778	78.3662	160.339	112.084	94.8445	95.1518	94.9556	104.29	107.216	110.948	90.8432	80.852	82.5824	112.481	282.949	233.103	132.682	131.211	93	104.864	154.107	107.839	157.096	96.0336	128.747	156.337	100.103	93.3288	115.309	317.284	156.697	112.97	150.248	121.009
Spirometra_erinaceieuropaei	47.7636	132.505	170.379	126.314	92.7178	84.2529	170.38	101.227	99.4647	135.117	134.768	139.019	79.5047	146.85	107.291	76.0652	73.3383	163.518	64.1815	156.472	47.202	188.383	20048.9	137.596	197.263	124	132.089	126.175	143.113	67.3268	239.723	151.575	151.827	132.278	228.707	68.9961	275.673	93.8594	119.681	120.594	119.966
Parastrongyloides_trichosuri	7.64217	3.759	3.11668	5.01245	11.4595	1.09419	11.1866	14.9351	6.78169	9.9086	12.009	2.59848	5.07477	4.41654	4.50172	3.62215	13.1633	2.13749	8.33526	0	6.02579	8.25581	4.8708	5.73318	11.6037	7	6.04986	9.6317	4.03135	3.45266	7.22057	7.30481	13.5291	3.57509	8.20473	4.72576	15.6041	5.56793	4.47406	7.90781	7.30226
Apis_cerana	26.7476	91.1558	31.1668	65.1618	40.6291	18.6013	37.0018	41.4864	19.5915	47.7415	53.3733	22.0871	25.7967	18.7703	30.7617	22.4574	26.3266	30.9936	30.0069	21.7322	27.1161	75.0528	38.2706	44.2274	57.1258	15	29.241	84.7589	37.29	31.0739	28.1602	24.6537	36.0777	22.3443	24.6142	44.4222	101.427	31.8168	51.4516	49.4238	34.425
Elaeophora_elaphi	12.4185	7.518	3.11668	5.01245	13.543	7.65935	4.30254	21.5729	3.01408	6.30548	13.3433	6.4962	7.18925	6.62481	6.75257	7.96874	9.40234	11.7562	4.16763	7.60627	5.02149	9.75687	12.5249	11.4664	16.0666	5	13.108	30.8214	4.03135	8.63164	5.0544	6.39171	10.5227	7.15018	5.12796	9.45152	28.6075	8.74961	10.0666	4.94238	9.38862
Ceratina_calcarata	24.8371	20.6745	15.5834	53.132	35.4203	35.0142	13.7681	26.5513	13.5634	53.1462	16.012	23.3863	27.0654	9.93721	30.0114	13.0398	26.3266	9.61869	39.1757	10.8661	31.1333	47.2833	208.749	37.6752	92.8294	10	20.1662	141.586	19.1489	22.4423	20.9397	26.4799	31.568	13.4066	29.7422	23.6288	33.8089	21.4763	24.6073	51.4008	15.6477
Gonium_pectorale	12.4185	8.45775	17.6612	12.0299	40.6291	14.2245	12.0471	14.9351	10.5493	67.5587	13.3433	36.3787	19.8762	13.2496	15.756	57.23	15.0437	38.4748	12.5029	16.2992	3.0129	34.5243	29.2248	16.3805	120.5	25	6.04986	8.66853	41.3214	10.358	6.49851	2.7393	15.0324	6.25641	16.4095	7.56122	50.7134	27.0442	16.7777	13.8387	11.475
Anopheles_epiroticus	33.4345	48.867	29.089	38.0946	37.5038	40.4851	32.6993	61.3999	24.8662	53.1462	22.6837	28.5833	54.1308	18.7703	29.2612	30.4261	28.207	22.4436	28.3399	24.992	37.1591	59.2917	32.0081	53.2367	47.3073	22	37.3075	54.9007	35.2744	29.3476	48.3778	23.7406	55.6198	46.4762	55.3819	45.3673	65.0171	33.4076	31.3184	26.6889	37.5545
Rhazya_stricta	32.4792	78.939	28.0501	58.1444	123.971	51.4271	60.2355	86.2917	22.6056	54.9477	98.7407	32.481	32.1402	18.7703	48.7686	27.5284	26.3266	23.5124	42.5098	14.1259	23.0989	132.093	73.7579	79.4455	60.6962	24	41.3407	71.2746	27.2116	39.7055	35.3808	60.2647	48.1036	32.1758	56.4075	80.338	113.13	35.7938	111.851	62.274	30.2522
Propionibacterium_sp._KPL1844	24.8371	26.313	28.0501	5.01245	48.9633	36.1084	17.2101	51.4431	9.04225	11.7102	6.67167	11.6932	4.65187	17.6662	17.2566	39.8437	16.9242	55.5747	44.1769	40.2046	3.0129	20.2643	16.0041	16.3805	85.6887	42	60.4986	12.5212	44.3449	18.9896	17.3294	10.0441	10.5227	7.15018	9.23032	14.1773	41.611	51.7022	10.0666	154.202	11.475
Ralstonia_sp._MD27	25.7923	30.072	22.8557	12.0299	57.2975	98.4774	32.6993	79.6539	21.0986	71.1618	69.3853	38.9772	32.1402	13.2496	27.0103	65.1988	22.5656	38.4748	37.5087	17.3858	14.0602	30.7717	18.7874	42.5894	68.7295	27	34.2826	20.2266	21.1646	56.9688	36.8249	15.5227	30.0648	15.1941	55.3819	9.45152	74.1195	27.0442	53.6887	42.5045	10.4318
Cylicostephanus_goldi	4.77636	11.277	7.27225	10.0249	10.4177	4.37677	6.02355	4.97837	6.02817	4.50391	16.012	5.19696	4.65187	3.3124	16.5063	2.89772	7.52187	7.48121	2.50058	4.34644	11.0473	12.759	12.5249	10.6473	9.8185	3	9.07479	11.558	5.03919	8.63164	5.0544	3.65241	9.01943	10.7253	8.20473	4.72576	20.8055	4.77251	6.71108	9.88476	3.12954
Paracoccus_marginatus	67.8243	51.6863	48.828	49.122	56.2557	27.3548	68.8406	66.3782	56.5141	26.1227	77.3913	24.6856	30.4486	62.9357	74.2783	52.8834	47.0117	59.8496	55.0127	70.6297	48.2063	54.038	42.4456	59.7889	33.9184	53	45.374	130.991	44.3449	63.8741	29.6043	74.8743	64.6392	64.3516	32.8189	51.9834	65.0171	57.2702	40.2665	48.4353	83.4544
Lichtheimia_corymbifera	20.0607	17.8553	10.3889	23.0573	26.0443	17.5071	16.3496	23.2324	6.02817	8.10704	17.3463	15.5909	26.6425	13.2496	13.5051	11.5909	15.0437	20.3061	15.0035	18.4724	16.0688	17.2622	11.1333	22.1137	30.3481	18	19.1579	25.0424	17.1333	17.2633	10.1088	8.21791	10.5227	12.5128	15.3839	16.0676	15.6041	13.5221	25.7258	11.8617	17.7341
Panthera_pardus	6994.5	9791.26	7342.9	7188.85	9648.9	10623.5	108442	9608.25	5928.7	6909.9	10688	5248.93	5452.84	5527.3	8818.86	10665.8	5584.99	9121.73	8035.19	8357.12	7286.19	10752.8	15843.3	6737.31	7391.54	6431	10019.6	13728.1	6822.06	7763.3	7153.42	8619.68	4563.83	6610.34	5132.06	10258.7	10240.2	9595.93	12442.3	14921	6265.34
Daphnia_magna	52.5399	72.3608	44.6724	92.2291	47.9216	98.4774	47.3279	28.2108	51.9929	106.292	22.6837	107.837	107.839	58.5191	32.2623	74.6164	69.5773	69.4683	42.5098	59.7636	64.2751	41.2791	47.3164	51.5987	104.433	25	42.349	79.9431	64.5017	67.3268	68.5954	62.0909	70.6522	52.7326	71.7914	57.6543	75.4199	40.5664	42.5035	28.6658	50.0727
Hymenolepis_microstoma	117.498	303.539	217.129	483.2	207.313	138.963	189.312	237.302	107.753	90.979	246.852	72.7574	219.484	209.786	243.093	153.579	137.274	100.462	142.533	262.96	59.2536	170.37	116.899	113.845	183.874	199	289.385	354.446	92.7211	188.17	65.7072	96.7888	142.808	143.897	226.656	57.6543	289.976	281.578	394.835	328.174	168.995
Drosophila_erecta	20.0607	15.036	34.2835	15.0373	17.7101	13.1303	14.6286	28.2108	33.1549	33.3289	20.015	40.2764	32.986	17.6662	18.7572	17.3863	24.4461	18.1686	28.3399	18.4724	13.0559	16.5116	59.8413	12.2854	25.8851	22	32.2659	189.744	25.196	46.6109	7.94263	10.9572	24.0518	9.8315	36.9213	13.2321	35.1093	23.8626	19.0147	20.758	7.30226
Rutstroemia_sydowiana	6.6869	14.0963	7.27225	7.01743	11.4595	2.18839	4.30254	6.63782	2.26056	9.00782	8.006	7.79544	4.65187	2.20827	13.5051	2.89772	0	13.8937	9.16878	3.25983	10.043	21.7653	63.3204	18.0186	11.6037	1	7.05817	19.2634	7.05487	5.17898	0.722057	6.39171	3.00648	1.78755	3.07677	12.287	20.8055	4.77251	5.59257	8.89628	5.2159
Capra_hircus	923.747	965.124	888.254	960.385	1228.25	700.284	1098.01	1096.9	634.464	789.986	1110.17	988.721	738.801	790.56	1020.39	753.408	797.319	804.764	1044.41	754.108	942.032	1411.74	830.124	1298.16	1413.86	938	937.729	768.61	725.644	911.501	759.604	888.448	922.988	1012.64	928.16	1080.31	1005.16	816.1	1005.54	1195.07	1082.82
Claviceps_fusiformis	55.4057	240.576	47.7891	150.373	156.266	180.542	140.263	165.946	36.9225	203.577	197.481	89.6475	66.3948	17.6662	96.0366	110.113	41.3703	61.9871	63.348	56.5038	79.3396	196.638	148.212	192.471	214.222	107	89.7396	298.583	59.4625	96.6744	101.81	138.791	63.136	40.2198	131.276	179.579	234.062	58.0656	343.384	154.202	50.0727
Bombyx_mori	46.8083	125.927	35.3224	88.2191	107.303	63.4632	71.4221	114.502	33.1549	72.9634	150.78	40.2764	39.7523	39.7488	61.5235	45.6391	48.8922	26.7186	55.8462	35.8582	58.2493	139.598	122.466	82.7217	68.7295	18	61.5069	173.371	34.2665	81.1374	35.3808	63.9171	69.1489	58.989	31.7933	168.237	146.939	46.9297	139.814	101.813	49.0295
Morone_saxatilis	59.2268	60.144	52.9836	91.2266	90.6343	61.2748	56.7935	96.2485	46.7183	90.979	93.4033	48.0719	48.2103	32.0199	54.7709	38.3948	63.9359	33.1311	45.8439	41.2912	51.2192	108.076	89.7619	64.7031	63.3739	36	62.5153	100.17	48.3763	69.0531	39.7131	59.3516	72.1554	50.0513	67.689	67.1058	115.731	46.9297	74.9404	67.2164	57.3749
Gallirallus_okinawae	11197.7	27685	15227.1	11735.1	18090.4	24071.2	22625.3	22918.7	10588.5	14300.8	22280.7	11594.4	16218.9	12846.6	24226.7	17365.3	9864.94	12177.3	14463.3	13102.4	15070.5	24493.5	17296.2	13372.2	19560.2	12078	22242.3	37639.7	13838.6	16517.5	10338.4	11637.5	11376.5	22519.5	27842.8	15895.6	25543.9	21373.7	37378.5	42168.4	15235.6
Streptomyces_purpurogeneiscleroticus	388.795	75.18	179.729	43.1071	720.907	901.615	283.107	1156.64	747.493	866.553	864.648	423.552	309.561	118.142	266.352	718.635	253.863	206.268	274.23	214.062	48.2063	69.7991	170.478	235.88	441.832	184	220.82	17.3371	276.148	521.351	391.355	103.18	377.313	33.9634	462.542	34.9706	1080.58	198.855	611.827	342.013	52.159
Solanum_arcanum	456.62	27.2528	37.4002	196.488	23.9608	13.1303	16.3496	43.1459	8.28873	86.4751	40.03	16.8901	18.6075	15.4579	12.0046	15.213	424.986	237.261	12.5029	6.51966	21.0903	102.072	50.7955	24.5708	18.7444	10	16.133	84.7589	8.06271	27.6212	12.997	24.6537	42.0907	9.8315	12.3071	22.6837	104.027	24.658	184.555	23.7234	26.0795
Eulemur_macaco	1364.13	654.066	1350.56	626.556	1137.62	1251.76	712.5	1241.27	1204.88	1381.8	1076.81	1600.66	1694.13	1527.02	1161.44	1283.69	1566.43	1510.13	1227.78	1664.69	620.657	691.237	803.682	652.764	1296.04	1522	1140.4	706.003	1607.5	1524.35	867.191	680.261	1605.46	593.465	1370.19	665.387	1254.83	1319.6	1059.23	988.476	629.038
Homo_sapiens	9.08384e+06	7.68224e+06	8.69751e+06	9.06062e+06	8.68129e+06	7.4045e+06	8.6553e+06	8.37896e+06	8.69681e+06	8.2652e+06	8.47081e+06	8.82311e+06	8.87282e+06	8.7529e+06	8.62745e+06	8.06639e+06	9.28559e+06	8.70541e+06	8.89198e+06	8.73373e+06	8.77227e+06	8.68652e+06	7.70837e+06	9.32069e+06	8.61004e+06	8742853	8.17798e+06	6.89417e+06	8.88416e+06	8.43934e+06	8.75492e+06	8.90938e+06	9.45416e+06	9.07945e+06	9.01713e+06	8.71371e+06	7.79684e+06	8.26437e+06	7.90135e+06	7.25752e+06	9.08066e+06
Yarrowia_sp._JCM_30696	433.693	1653.96	380.235	1066.65	1560.58	1798.85	1235.69	1606.35	156.732	744.046	1965.47	422.253	430.932	264.992	1144.94	1300.35	267.027	518.341	1145.26	521.573	833.568	1790.76	1399.31	1769.1	1706.63	463	634.227	2441.64	486.786	830.364	459.228	746.004	441.952	506.769	806.115	1775.94	2142.96	276.01	2570.35	1414.51	484.036
Glycine_max	5.73163	12.2168	8.31115	11.0274	11.4595	8.75355	6.88406	11.6162	6.02817	15.3133	14.6777	3.89772	8.45794	5.52067	105.79	5.79545	13.1633	7.48121	5.00115	3.25983	6.02579	19.5137	19.4832	9.00929	8.92591	3	9.07479	15.4107	9.07055	5.17898	3.61029	5.47861	15.0324	3.57509	2.05118	6.61607	16.9045	7.95419	10.0666	4.94238	8.34544
Amazona_aestiva	17.1949	48.867	34.2835	37.0921	62.5064	26.2606	28.3967	41.4864	14.3169	130.613	42.6987	25.9848	28.757	9.93721	39.7652	23.1818	22.5656	16.0312	15.0035	18.4724	20.086	111.078	492.647	41.7703	54.448	10	32.2659	61.6429	21.1646	43.1582	24.5499	34.6979	55.6198	22.3443	16.4095	46.3125	133.935	34.9984	61.5183	38.5506	36.5113
Exophiala_alcalophila	12.4185	63.903	28.0501	41.1021	35.4203	20.7897	27.5362	48.1242	7.53521	6.30548	50.7047	11.6932	7.18925	14.3537	33.7629	21.0085	11.2828	17.0999	30.0069	10.8661	11.0473	46.5328	29.9206	31.123	35.7036	7	40.3324	75.1272	10.0784	27.6212	8.66468	13.6965	9.01943	7.15018	8.20473	42.5319	57.2151	7.95419	30.1999	22.7349	27.1227
Pelomonas_sp._Root1237	5.73163	1.8795	20.7779	1.00249	43.7545	45.9561	9.46558	76.335	6.02817	41.436	54.7077	12.9924	16.0701	9.93721	15.0057	34.7727	16.9242	17.0999	25.8393	19.559	5.02149	0.750528	0.695829	4.09513	45.5221	22	26.2161	0	11.0862	32.8002	5.77646	0.913102	27.0583	2.68132	31.7933	0.945152	70.2185	11.9313	31.3184	25.7004	0
Pogonomyrmex_barbatus	21.9712	48.867	22.8557	26.0647	41.6709	22.9781	37.0018	76.335	10.5493	41.436	53.3733	27.284	19.4533	3.3124	25.5097	15.213	22.5656	17.0999	21.6717	18.4724	30.129	58.5412	40.3581	30.304	49.0925	15	36.2992	193.597	30.2352	20.7159	12.997	27.393	40.5874	17.8755	21.5374	36.8609	72.8192	129.653	50.3331	45.4699	29.2091
Gaeumannomyces_sp._JS-464	25.7923	47.9273	6.23336	47.117	29.1696	10.9419	40.4438	26.5513	6.02817	15.3133	58.7107	6.4962	24.9509	3.3124	34.5132	7.24431	15.0437	8.54995	9.16878	7.60627	22.0946	45.0317	9.7416	44.2274	22.3148	49	11.0914	26.9688	21.1646	22.4423	5.77646	8.21791	22.5486	14.3004	24.6142	25.5191	53.3141	12.7267	71.5849	18.781	32.3386
Corynebacterium_kroppenstedtii	8.59744	10.3373	4.15557	3.00747	10.4177	17.5071	9.46558	9.95674	3.01408	11.7102	14.6777	3.89772	3.80607	1.10413	9.75372	11.5909	1.88047	3.20623	8.33526	5.43305	3.0129	3.75264	5.56663	28.6659	10.7111	3	7.05817	3.85268	2.01568	12.0843	4.33234	4.56551	4.50971	2.68132	9.23032	9.45152	7.80206	14.3175	17.8962	14.8271	6.25908
Anopheles_maculatus	62.0926	44.1683	35.3224	45.112	71.8823	42.6735	70.5616	66.3782	25.6197	88.2767	41.3643	32.481	65.5491	24.291	42.7663	29.7017	48.8922	27.7873	24.1722	40.2046	24.1032	48.0338	51.4913	36.0372	34.811	31	30.2493	59.7165	37.29	44.8845	27.4382	27.393	49.6069	35.7509	57.4331	31.19	58.5154	43.748	26.8443	37.5621	25.0363
Cajanus_cajan	28.6581	48.867	15.5834	28.0697	39.5874	25.1664	33.5598	53.1026	17.331	42.3368	45.3673	23.3863	31.7173	15.4579	27.0103	32.5994	43.2508	26.7186	20.0046	22.8188	28.1204	57.7907	45.9247	46.6845	23.2074	17	31.2576	51.048	31.243	44.8845	25.272	29.2193	76.6651	20.5568	18.4606	38.7512	71.5189	31.0213	31.3184	38.5506	26.0795
Nannochloropsis_oceanica	5.73163	5.6385	7.27225	5.01245	13.543	6.56516	3.44203	3.31891	3.7676	10.8094	10.6747	5.19696	2.96028	0	2.25086	6.51988	3.76094	4.27497	4.16763	5.43305	7.03009	6.75476	22.2665	4.91416	3.57036	7	5.04155	5.77902	3.02352	1.72633	9.38674	5.47861	3.00648	5.36264	4.10237	16.0676	18.2048	5.56793	4.47406	0.988476	4.17272
Pediculus_humanus	21.016	19.7348	19.739	16.0398	18.7519	5.47097	12.9076	19.9135	6.02817	47.7415	13.3433	15.5909	8.03504	5.52067	8.25315	7.24431	9.40234	8.54995	5.83468	8.69289	16.0688	33.7738	41.7497	22.1137	15.174	11	9.07479	183.002	7.05487	13.8106	9.38674	10.0441	22.5486	8.93773	11.2815	17.9579	48.1127	54.8839	14.5407	7.90781	26.0795
Vigna_unguiculata	17.1949	31.0118	14.5445	26.0647	36.4621	17.5071	15.4891	36.508	15.0704	30.6266	26.6867	10.3939	23.6822	16.562	31.512	16.6619	13.1633	30.9936	18.3376	24.992	19.0817	44.2812	42.4456	21.2947	24.9925	14	27.2244	52.9743	19.1489	24.1686	12.997	28.3062	34.5745	16.9817	19.4862	27.4094	88.4233	29.4305	32.4369	24.7119	17.7341
Clostridioides_difficile	30.5687	18.795	46.7502	16.0398	326.075	70.0284	26.6757	36.508	20.3451	201.775	30.6897	270.242	68.9322	30.9158	114.794	44.1903	65.8164	44.8872	15.0035	15.2125	17.0731	101.321	77.237	100.74	222.255	62	42.349	208.045	56.439	93.2217	9.38674	188.099	64.6392	24.1319	88.2009	15.1224	175.546	73.9739	36.911	77.1011	143.959
Danaus_plexippus	58.2716	108.071	58.178	70.1743	71.8823	87.5355	109.284	91.2701	56.5141	50.4438	138.771	53.2688	65.9719	51.8943	100.538	63.0255	90.2625	38.4748	45.8439	55.4171	76.3267	95.3171	102.983	75.3504	83.9035	54	83.6898	167.592	49.3841	101.853	45.4896	67.5695	85.6846	65.2454	34.8701	74.667	154.741	56.4747	98.4292	132.456	68.8499
Dorcoceras_hygrometricum	31.524	31.0118	31.1668	32.0797	39.5874	27.3548	20.6522	48.1242	17.331	44.1383	36.027	27.284	28.3341	14.3537	23.2589	26.8039	24.4461	27.7873	20.0046	26.0787	35.1505	48.7843	45.9247	43.4084	41.0592	17	31.2576	65.4955	31.243	29.3476	20.2176	31.0455	67.6457	20.5568	28.7166	30.2449	65.0171	36.5893	32.4369	23.7234	34.425
Fagopyrum_esculentum	47.7636	71.421	35.3224	55.1369	66.6735	33.92	32.6993	69.6972	24.8662	49.543	73.3883	25.9848	32.5631	34.2282	36.764	34.0482	65.8164	45.956	31.674	30.4251	28.1204	83.3086	59.8413	48.3226	45.5221	35	51.4238	79.9431	42.3292	67.3268	28.8823	45.6551	78.1684	33.9634	39.9981	56.7091	107.928	43.748	53.6887	39.539	38.5977
Erysipelotrichaceae_bacterium_5_2_54FAA	21.9712	59.2043	12.4667	31.0772	45.838	28.449	30.9783	33.1891	13.5634	20.718	29.3553	24.6856	20.2991	3.3124	33.0126	18.8352	9.40234	8.54995	12.5029	11.9527	27.1161	47.2833	26.4415	38.4942	12.4963	3	19.1579	118.47	12.0941	18.9896	18.0514	24.6537	12.0259	34.8571	34.8701	39.6964	28.6075	22.2717	81.6515	49.4238	23.9931
Dicrocoelium_dendriticum	21.016	29.1323	16.6223	23.0573	28.1279	22.9781	34.4203	36.508	14.3169	18.9164	20.015	20.7878	18.6075	20.9786	24.7594	21.0085	22.5656	16.0312	20.8381	14.1259	20.086	39.0275	24.354	17.1996	32.1333	15	39.3241	41.4163	25.196	20.7159	13.7191	16.4358	37.5809	19.663	32.8189	35.9158	41.611	26.2488	41.385	44.4814	30.2522
Saccharum_hybrid_cultivar	36.3003	52.626	47.7891	39.0971	69.7988	29.5432	42.1649	54.7621	26.3732	74.7649	81.3943	15.5909	35.5234	30.9158	41.2657	26.8039	45.1312	34.1998	24.1722	33.6849	39.1677	72.8013	88.3703	39.3133	54.448	28	47.3906	106.912	30.2352	41.4319	33.9367	47.4813	63.136	24.1319	26.6654	54.8188	109.229	30.2259	55.9257	31.6312	27.1227
Acanthochromis_polyacanthus	62.0926	84.5775	62.3336	74.1842	107.303	54.7097	64.538	76.335	51.9929	101.788	104.078	45.4734	54.9766	46.3736	57.772	59.4033	71.4578	48.0935	41.6763	45.6376	60.2579	160.613	114.116	94.188	85.6887	53	77.6399	252.35	49.3841	110.485	38.9911	63.9171	151.827	62.5641	33.8445	68.9961	167.744	58.0656	79.4145	79.0781	92.8431
Betula_nana	219.712	765.897	11533.8	361.899	551.098	129.115	10915.5	290.405	218.521	5592.06	348.261	36.3787	330.706	467.049	471.18	94.176	7867.88	311.004	380.921	314.03	535.291	427.801	167.695	484.864	531.984	397	16385	444.021	216.685	550.699	8284.16	288.54	291.628	122.447	355.88	233.453	751.598	400.891	305.354	140.364	355.725
Gavia_stellata	172.904	429.466	224.401	268.667	323.991	317.316	304.62	341.848	181.598	164.843	420.315	132.522	146.745	230.764	291.111	256.448	171.123	243.674	290.067	207.543	208.894	323.478	363.223	158.072	251.711	220	348.875	567.307	227.772	302.107	150.188	321.412	181.892	197.524	151.788	426.264	512.335	269.647	376.939	438.883	243.061
Mchenga_conophoros	1.91054	8.45775	4.15557	9.02241	6.25064	7.65935	5.16304	6.63782	3.7676	2.70235	2.66867	2.59848	2.53738	5.52067	6.75257	4.34658	5.64141	5.34372	10.0023	3.25983	13.0559	5.2537	18.0916	3.27611	2.67777	6	9.07479	9.6317	3.02352	3.45266	7.22057	6.39171	12.0259	8.04396	3.07677	11.3418	6.50171	3.18168	5.59257	15.8156	4.17272
Drosophila_busckii	12.4185	23.4938	15.5834	27.0672	30.2114	8.75355	13.7681	21.5729	10.5493	20.718	34.6927	11.6932	16.9159	16.562	14.2554	6.51988	15.0437	9.61869	6.66821	14.1259	12.0516	46.5328	43.1414	16.3805	24.9925	12	15.1247	47.1953	24.1881	17.2633	10.1088	10.9572	30.0648	14.3004	8.20473	24.574	63.7168	29.4305	31.3184	21.7465	29.2091
Oesophagostomum_dentatum	18.1502	18.795	8.31115	29.0722	21.8772	14.2245	18.0707	23.2324	9.04225	20.718	20.015	7.79544	13.5327	5.52067	11.2543	7.24431	5.64141	8.54995	12.5029	6.51966	15.0645	39.778	25.0498	18.8376	16.9592	17	17.1413	34.6741	15.1176	18.9896	7.94263	10.9572	30.0648	8.04396	1.02559	15.1224	37.7099	138.403	24.6073	21.7465	14.6045
Artocarpus_camansi	75.4664	69.5415	61.2947	64.1593	100.01	66.7458	68.8406	97.9079	42.9507	99.086	108.081	70.1589	89.2313	58.5191	69.0263	73.8919	99.6648	68.3996	59.1803	65.1966	53.2278	114.08	82.1078	97.4641	102.648	52	78.6482	115.58	76.5957	119.117	49.8219	56.6123	115.749	60.7766	62.5611	76.5573	185.949	66.0198	99.5477	89.9513	62.5908
Hevea_brasiliensis	42.9872	77.9993	43.6335	35.0871	68.757	30.6374	49.9094	68.0377	31.6479	62.154	92.069	28.5833	52.0163	30.9158	46.5177	45.6391	63.9359	33.1311	34.1746	35.8582	35.1505	104.323	80.7161	76.9885	60.6962	38	53.4405	108.838	38.2979	77.6848	34.6587	47.4813	111.24	39.326	32.8189	56.7091	113.13	37.3847	60.3998	41.516	42.7704
Oryza_punctata	10.508	30.072	20.7779	15.0373	18.7519	13.1303	12.9076	16.5946	9.04225	35.1305	18.6807	15.5909	17.3388	7.72894	13.5051	16.6619	15.0437	12.8249	12.5029	9.7795	8.03439	58.5412	86.2828	22.1137	17.8518	12	14.1163	29.8583	6.04703	31.0739	12.997	11.8703	30.0648	12.5128	11.2815	12.287	55.9147	16.7038	16.7777	11.8617	14.6045
Nannospalax_galili	8663.36	7056.59	7928.83	7855.51	7446.59	7214.02	6776.5	7014.52	7017.54	8134.06	7320.15	8769.87	9093.98	8175.01	7319.04	7287.77	9022.49	7942.9	6900.76	8084.38	7724.06	6799.79	6325.78	7658.71	7867.29	8036	7154.97	6465.76	8323.74	8707.6	7731.06	7296.6	8810.48	7477.3	8144.22	7252.15	7501.68	7778.4	6756.94	6190.83	7898.96
Mus_spretus	1184.54	1131.46	1283.03	1226.05	1182.41	978.209	1117.8	1226.34	1171.72	1158.41	1335.67	1166.72	1247.55	1245.46	1150.19	1020.72	1212.9	1079.43	1212.78	1165.93	1132.85	1433.51	1203.78	1321.09	1232.67	1379	1293.66	1148.1	1189.25	1457.02	1180.56	1178.81	1416.05	1077	1090.2	1262.72	1401.77	1243.24	1108.45	1159.48	1247.64
Spodoptera_litura	44.8978	73.3005	48.828	41.1021	95.8431	42.6735	58.5145	92.9295	32.4014	34.2297	73.3883	28.5833	25.7967	43.0612	46.5177	59.4033	37.6094	60.9184	53.3457	41.2912	44.1891	73.5518	288.769	58.9699	54.448	43	67.5568	134.844	42.3292	69.0531	37.547	59.3516	81.1748	44.6886	24.6142	62.3801	93.6247	61.2472	59.2812	77.1011	35.4681
Linepithema_humile	17.1949	24.4335	9.35004	18.0448	21.8772	14.2245	12.9076	21.5729	6.78169	21.6188	14.6777	9.09468	11.8411	8.83308	12.0046	13.7642	16.9242	13.8937	10.0023	9.7795	6.02579	34.5243	18.7874	19.6566	16.9592	11	21.1745	135.807	17.1333	20.7159	9.38674	9.13102	30.0648	9.8315	5.12796	17.9579	37.7099	50.1114	29.0814	17.7926	12.5182
Dipodomys_ordii	5154.64	4208.2	4685.41	4989.39	4742.15	3884.39	4400.63	4619.93	4418.65	4487.7	5027.77	5099.52	5257.46	5311.99	4624.76	4125.63	5423.27	4574.22	4551.05	4712.63	4438	4690.05	3853.5	4977.22	5247.54	5094	4225.83	4583.73	5060.36	5422.4	4408.16	4227.66	5384.6	4249.89	4788.49	4645.42	5172.76	4844.9	4421.49	4040.89	4503.41
Kalanchoe_fedtschenkoi	76.4217	165.396	92.4615	90.2241	139.598	106.137	101.54	151.011	45.9648	60.3524	184.138	40.2764	74.4299	51.8943	175.567	110.113	86.5016	88.7057	68.3491	78.236	95.4084	126.089	146.124	90.0929	67.8369	20	138.139	238.866	92.7211	127.748	49.8219	84.9185	82.6781	87.5897	93.3288	117.199	161.243	108.177	216.992	165.075	100.145
Dictyocaulus_viviparus	20.0607	9.3975	17.6612	17.0423	22.919	6.56516	18.9312	26.5513	9.04225	7.20626	14.6777	11.6932	10.5724	5.52067	15.756	13.7642	11.2828	11.7562	6.66821	10.8661	12.0516	17.2622	21.5707	17.1996	9.8185	3	24.1995	25.0424	12.0941	18.9896	10.1088	16.4358	33.0712	12.5128	9.23032	22.6837	19.5051	18.2946	14.5407	23.7234	9.38862
Phodopus_sungorus	2974.71	2264.8	2850.72	2419.01	2482.55	2364.55	2167.62	2499.14	2492.65	2859.98	3012.92	3009.04	3101.95	3317.92	2463.94	2883.96	3266.37	2752.01	2392.22	2764.34	2271.72	2185.54	2018.6	2303.1	2798.27	2798	2428.01	2257.67	2889.47	3040.06	2570.52	2114.74	3039.55	2145.95	2898.32	2049.09	2600.69	2751.35	2234.79	2169.7	2317.95
Actinomyces_oris	11.4633	7.518	5.19447	1.00249	14.5848	6.56516	9.46558	16.5946	3.7676	11.7102	6.67167	2.59848	0.845794	2.20827	6.75257	8.69317	7.52187	8.54995	4.16763	2.17322	2.0086	6.00423	5.56663	4.91416	18.7444	7	11.0914	1.92634	11.0862	8.63164	8.66468	1.8262	1.50324	6.25641	2.05118	0	7.80206	18.2946	2.23703	213.511	10.4318
Heliothis_virescens	26.7476	37.59	18.7001	29.0722	42.7127	15.3187	35.2808	44.8053	10.5493	23.4203	58.7107	19.4886	25.3738	13.2496	23.2589	20.2841	18.8047	13.8937	10.0023	18.4724	23.0989	46.5328	38.2706	36.8562	22.3148	11	35.2909	89.5748	17.1333	32.8002	12.997	21.0013	33.0712	14.3004	17.4351	41.5867	68.9182	18.2946	34.6739	38.5506	20.8636
Listeria_monocytogenes	2.86581	3.759	3.11668	3.00747	13.543	10.9419	2.58152	8.29728	0	3.60313	1.33433	0	2.96028	4.41654	26.26	10.142	18.8047	5.34372	2.50058	2.17322	2.0086	6.75476	4.17497	7.37124	13.3889	0	3.02493	24.0792	5.03919	5.17898	1.44411	1.8262	7.51619	4.46886	4.10237	4.72576	13.0034	11.9313	3.35554	12.8502	8.34544
Ictalurus_punctatus	454.709	818.523	633.725	548.362	918.844	885.202	683.243	682.036	312.711	644.96	741.889	400.166	559.07	544.338	772.044	652.712	400.54	78.0183	836.86	573.73	559.394	949.418	665.212	674.878	1055.93	564	866.139	1041.19	82.6428	616.299	402.908	451.985	488.552	514.813	547.666	727.767	997.363	859.052	997.714	1280.08	529.936
Eichhornia_paniculata	39.1661	46.0478	32.2057	42.1046	52.0887	33.92	51.6304	86.2917	27.1267	44.1383	56.042	37.6779	47.3645	27.6034	43.5166	32.5994	58.2945	42.7497	37.5087	32.5983	38.1634	95.3171	74.4537	47.5035	52.6628	32	67.5568	98.2433	37.29	75.9584	28.1602	46.5682	87.1878	32.1758	33.8445	59.5446	92.3243	39.7709	61.5183	58.3201	40.684
Trichoplax_adhaerens	0.955271	7.518	6.23336	5.01245	7.29241	3.28258	10.3261	9.95674	1.50704	3.60313	12.009	1.29924	6.34346	4.41654	12.0046	10.8665	13.1633	6.41246	6.66821	9.7795	7.03009	6.00423	6.95829	9.00929	7.14072	1	8.06648	13.4844	5.03919	10.358	5.0544	10.9572	12.0259	3.57509	2.05118	7.56122	11.7031	8.74961	5.59257	8.89628	5.2159
Daucus_carota	28.6581	63.903	23.8945	23.0573	66.6735	19.6955	42.1649	69.6972	13.5634	48.6422	49.3703	22.0871	27.9112	18.7703	30.7617	27.5284	28.207	17.0999	29.1734	23.9054	30.129	75.0528	48.708	60.6079	53.5554	17	36.2992	79.9431	19.1489	67.3268	18.0514	39.2634	66.1425	20.5568	34.8701	40.6416	102.727	28.6351	88.3626	55.3547	35.4681
Diploscapter_coronatus	3.82109	14.0963	2.07779	8.01992	13.543	7.65935	7.74457	11.6162	1.50704	8.10704	10.6747	7.79544	2.96028	1.10413	6.00229	7.96874	7.52187	4.27497	2.50058	3.25983	5.02149	15.7611	14.6124	7.37124	4.46295	3	4.03324	70.3114	6.04703	10.358	3.61029	6.39171	13.5291	5.36264	6.15355	11.3418	23.4062	4.77251	8.94811	9.88476	6.25908
Microbotryum_violaceum	0.955271	2.81925	4.15557	6.01494	7.29241	2.18839	3.44203	1.65946	0	6.30548	1.33433	1.29924	0.422897	11.0413	3.75143	2.17329	0	0	0.833526	0	2.0086	58.5412	32.704	27.0279	4.46295	0	2.01662	26.9688	0	0	4.33234	2.7393	1.50324	1.78755	0	2.83546	50.7134	12.7267	6.71108	7.90781	5.2159
Macrostomum_lignano	62.0926	91.1558	54.0225	73.1818	64.5899	66.7458	53.3515	63.0593	48.2253	81.9712	54.7077	54.5681	82.4649	60.7274	52.52	61.5766	56.4141	53.4372	42.5098	41.2912	37.1591	46.5328	50.7955	43.4084	54.448	63	51.4238	234.05	58.4546	77.6848	35.3808	56.6123	60.1295	40.2198	57.4331	63.3252	76.7202	86.7006	65.9923	107.744	40.684
Tetradesmus_obliquus	5.73163	7.518	11.4278	2.00498	8.33418	4.37677	5.16304	4.97837	6.78169	11.7102	8.006	14.2916	18.6075	18.7703	15.0057	7.96874	26.3266	11.7562	11.6694	14.1259	4.0172	9.75687	16.0041	4.09513	15.174	13	7.05817	4.81585	16.1254	8.63164	7.22057	5.47861	15.0324	3.57509	10.2559	1.8903	14.3038	8.74961	5.59257	1.97695	12.5182
Lasius_niger	42.0319	324.214	55.0614	201.5	216.689	117.079	148.868	207.432	35.4155	155.835	217.496	75.3559	68.5093	35.3323	87.7835	78.2385	63.9359	72.6746	96.689	54.3305	83.3568	267.939	116.203	169.538	190.122	56	108.898	485.438	63.4938	138.106	102.532	120.529	46.6004	82.2271	101.534	235.343	239.263	136.017	227.058	307.416	70.9363
Bombus_terrestris	7.64217	9.3975	6.23336	21.0523	17.7101	10.9419	13.7681	16.5946	5.27465	13.5117	12.009	2.59848	9.30374	2.20827	12.7549	12.3153	11.2828	7.48121	5.83468	8.69289	9.03869	25.518	13.9166	18.8376	15.174	6	14.1163	34.6741	7.05487	25.8949	5.77646	11.8703	19.5421	5.36264	14.3583	13.2321	13.0034	7.15877	12.3037	10.8732	13.5613
Asanoa_ferruginea	281.805	71.421	262.84	22.0548	675.069	739.675	194.475	891.128	507.119	726.031	931.365	388.473	245.703	174.453	234.089	649.09	210.612	330.242	476.777	262.96	59.2536	126.089	90.4578	222.775	590.895	271	318.626	19.2634	230.795	466.109	264.995	71.2219	327.706	15.1941	427.672	23.6288	1066.28	271.238	529.057	537.731	41.7272
Calopteryx_splendens	217.802	430.406	230.634	324.807	313.574	364.366	295.154	310.318	171.049	485.522	385.622	176.697	195.378	155.683	249.845	265.142	189.927	207.336	160.037	166.251	219.941	523.869	475.947	235.061	234.751	166	261.152	709.856	201.568	288.297	154.52	243.798	275.093	247.575	187.683	307.175	660.574	237.035	380.295	333.116	246.191
Apteryx_australis	209.204	303.539	201.545	268.667	352.119	187.107	251.268	325.253	200.437	253.12	329.58	170.2	178.04	166.724	219.084	176.761	191.808	209.474	195.045	165.165	189.812	367.008	285.29	221.956	260.636	176	224.853	399.715	236.842	307.286	181.236	196.317	229.995	219.868	179.479	277.875	379.7	311.009	316.539	381.552	226.37
Haloparvum_sedimenti	5.73163	0	27.0112	0	5.20887	12.0361	0	8.29728	0.753521	16.2141	9.34033	11.6932	86.271	7.72894	23.2589	48.5369	67.6969	54.5059	5.83468	58.677	0	0	1.39166	3.27611	1.78518	8	22.1828	0.96317	17.1333	17.2633	1.44411	0	27.0583	0.893773	20.5118	0	15.6041	17.4992	26.8443	1.97695	1.04318
Delftia_sp._Cs1-4	31.524	11.277	62.3336	9.02241	116.679	133.492	20.6522	268.832	22.6056	154.034	142.774	63.6627	49.9019	33.124	51.7697	159.375	54.5336	59.8496	88.3537	72.8029	4.0172	14.26	2.78332	13.1044	190.122	53	75.6233	6.74219	40.3135	117.39	21.6617	7.30481	99.2137	7.15018	86.1497	3.78061	256.168	58.861	88.3626	86.9859	3.12954
Eurytemora_affinis	89.7955	112.77	75.8392	125.311	100.01	56.898	109.284	102.886	52.7465	90.0782	101.409	67.5605	76.1215	51.8943	93.7858	62.301	62.0555	78.0183	85.8532	43.4644	135.58	159.863	105.07	144.149	70.5147	63	83.6898	146.402	48.3763	105.306	91.7012	78.5267	94.704	84.9084	77.945	123.815	135.236	95.4503	73.8219	102.802	115.793
Polistes_canadensis	34.3898	109.951	38.4391	48.1195	66.6735	45.9561	55.933	77.9944	21.0986	61.2532	64.048	25.9848	34.6776	33.124	34.5132	39.1193	52.6531	34.1998	30.8405	32.5983	47.202	105.074	72.3662	62.246	83.9035	26	39.3241	184.929	31.243	46.6109	30.3264	54.7861	66.1425	33.0696	45.126	70.8864	126.133	35.7938	81.6515	85.0089	29.2091
Calephelis_nemesis	47.7636	102.433	42.5946	69.1718	90.6343	49.2387	74.8641	126.119	33.9084	41.436	104.078	28.5833	56.6682	33.124	57.0217	45.6391	52.6531	63.0559	39.1757	40.2046	43.1848	108.827	87.6744	78.6265	70.5147	42	70.5817	182.039	55.4311	84.5901	33.2146	68.4826	102.22	41.1136	35.8957	90.7346	162.543	67.6106	105.14	83.032	64.6772
Hymenoscyphus_infarciens	2.86581	30.072	7.27225	6.01494	13.543	1.09419	1.72101	19.9135	5.27465	8.10704	13.3433	6.4962	3.80607	6.62481	7.50286	4.34658	3.76094	0	6.66821	5.43305	4.0172	12.759	4.17497	4.91416	2.67777	3	6.04986	12.5212	4.03135	13.8106	2.16617	10.9572	3.00648	4.46886	4.10237	5.67091	15.6041	3.18168	7.8296	9.88476	3.12954
Solanum_melongena	39.1661	42.2888	42.5946	36.0896	55.214	29.5432	42.1649	54.7621	28.6338	51.3446	69.3853	20.7878	45.25	24.291	35.2634	39.8437	82.7406	37.406	27.5064	34.7715	31.1333	85.5602	59.8413	61.427	39.274	34	53.4405	101.133	37.29	70.7794	26.7161	52.9599	111.24	35.7509	20.5118	39.6964	115.731	50.1114	38.0295	43.4929	43.8136
Pseudogymnoascus_destructans	76.4217	353.346	343.874	27.0672	221.898	196.955	251.268	224.027	91.9295	62.154	310.9	75.3559	234.708	394.176	317.371	145.611	135.394	298.179	622.644	293.385	182.782	152.357	128.728	61.427	373.103	260	623.136	395.863	190.481	252.044	58.4866	123.269	123.266	180.542	272.807	302.449	270.471	79.5419	504.45	171.006	119.966
Methylobacterium_sp._UNC378MF	60.1821	11.277	45.7113	5.01245	177.101	189.295	40.4438	240.621	143.169	138.72	198.816	68.8597	65.1262	29.8116	54.0206	165.895	62.0555	49.1622	90.8543	55.4171	6.02579	9.00634	28.529	40.1323	117.822	42	40.3324	7.70536	41.3214	122.569	57.0425	16.4358	82.6781	6.25641	97.4312	5.67091	236.662	46.9297	140.933	85.0089	12.5182
Saccharina_japonica	79.2875	113.71	79.9948	97.2415	130.222	90.818	84.3297	96.2485	76.8591	101.788	133.433	53.2688	87.9626	57.415	102.789	73.8919	92.143	79.087	72.5167	57.5904	92.3955	156.86	97.416	118.759	123.178	69	98.8144	174.334	80.6271	100.127	78.7042	99.5281	88.691	66.1392	111.789	111.528	169.045	204.423	137.577	54.3662	81.3681
3300009181_____Ga0114969_10004241	6.6869	22.554	3.11668	19.0473	12.5013	5.47097	16.3496	18.254	7.53521	7.20626	21.3493	3.89772	8.88084	0	15.0057	10.142	7.52187	5.34372	4.16763	3.25983	16.0688	16.5116	6.95829	17.1996	7.14072	2	7.05817	48.1585	9.07055	6.90531	12.275	9.13102	7.51619	16.9817	10.2559	15.1224	13.0034	11.1359	38.0295	22.7349	6.25908
Folsomia_candida	53.4952	125.927	66.4892	74.1842	88.5507	126.926	123.913	114.502	51.9929	56.7493	190.81	38.9772	52.4392	67.3522	100.538	96.3493	63.9359	63.0559	15.837	59.7636	61.2622	73.5518	107.158	49.9606	62.4813	54	118.981	218.64	69.5409	107.032	55.5984	58.4385	64.6392	49.1575	58.4587	29.2997	153.44	89.8823	147.644	136.41	57.3749
Bradyrhizobium_embrapense	11.4633	0.93975	7.27225	0	23.9608	26.2606	11.1866	39.8269	6.02817	36.0313	26.6867	10.3939	2.96028	5.52067	6.00229	23.1818	5.64141	17.0999	20.8381	10.8661	6.02579	8.25581	2.78332	7.37124	28.5629	20	18.1496	4.81585	7.05487	17.2633	14.4411	1.8262	12.0259	1.78755	13.3327	0	35.1093	11.1359	24.6073	20.758	0
Burkholderia_contaminans	6.6869	2.81925	6.23336	0	10.4177	15.3187	2.58152	28.2108	3.7676	18.9164	21.3493	7.79544	4.65187	5.52067	10.504	9.4176	9.40234	8.54995	13.3364	5.43305	0	2.25159	3.47914	5.73318	29.4555	6	5.04155	1.92634	4.03135	10.358	5.77646	1.8262	12.0259	1.78755	6.15355	0.945152	36.4096	5.56793	10.0666	14.8271	5.2159
Cenchrus_americanus	31.524	41.349	25.9723	32.0797	43.7545	33.92	34.4203	41.4864	17.331	71.1618	58.7107	23.3863	34.6776	19.8744	42.7663	35.4971	41.3703	29.9248	25.8393	22.8188	24.1032	69.0486	56.3621	33.5801	38.3814	23	45.374	61.6429	45.3527	62.1478	28.1602	34.6979	61.6328	20.5568	28.7166	31.19	109.229	37.3847	48.0961	26.6889	33.3818
Paracoccidioides_brasiliensis	175.77	511.224	180.767	371.924	403.166	574.451	351.087	394.951	235.852	610.73	298.891	346.897	244.857	98.268	259.599	391.917	127.872	203.061	237.555	166.251	330.414	601.173	240.061	731.39	591.788	118	292.41	534.559	252.967	212.338	397.853	322.325	201.434	214.505	330.24	362.939	453.82	233.058	588.338	542.673	188.816
Mesocricetus_auratus	3787.65	2927.32	2965	7607.9	2961.76	2558.22	2826.77	2996.98	2859.61	2764.5	2880.83	2940.18	3639.45	3457.04	2957.63	2869.47	3915.14	3593.12	3018.2	3595.59	3119.35	2629.1	2768.7	3435.82	3285.63	3611	2717.4	2980.05	3337.96	3551.06	2857.9	2869.88	3649.86	3089.77	2771.15	3131.29	3127.32	3483.14	2911.49	2765.76	3407.03
Acanthoscurria_geniculata	613.284	581.706	550.614	486.208	722.991	449.713	506.839	753.393	592.267	608.028	675.173	572.965	746.413	580.775	558.213	416.548	669.447	538.647	589.303	479.195	407.745	545.634	491.951	518.444	527.521	605	519.28	1035.41	932.251	965.017	514.105	393.547	942.53	395.048	646.123	444.222	866.028	575.088	452.998	464.584	541.411
Operophtera_brumata	42.9872	87.3968	40.5168	60.1494	86.4672	42.6735	48.1884	73.0161	29.3873	61.2532	102.744	27.284	36.792	44.1654	57.0217	48.5369	80.8601	58.7809	40.8428	39.118	45.1934	103.573	88.3703	76.9885	91.9368	33	43.3574	164.702	51.3998	69.0531	26.7161	45.6551	81.1748	45.5824	43.0748	63.3252	118.331	60.4518	87.2441	86.9859	42.7704
Drosophila_ficusphila	30.5687	31.0118	33.2446	27.0672	33.3367	27.3548	32.6993	38.1675	19.5915	31.5274	38.6957	18.1894	28.3341	34.2282	32.2623	34.0482	39.4898	35.2685	26.6728	21.7322	22.0946	51.7865	87.6744	22.1137	23.2074	17	40.3324	52.0112	33.2587	29.3476	16.6073	27.393	18.0389	22.3443	27.691	23.6288	53.3141	31.8168	21.2518	39.539	27.1227
Cicer_arietinum	37.2556	27.2528	18.7001	31.0772	42.7127	25.1664	33.5598	48.1242	18.838	29.7258	34.6927	18.1894	34.6776	20.9786	22.5086	25.3551	47.0117	27.7873	17.504	18.4724	24.1032	65.296	64.7121	48.3226	33.0259	15	32.2659	52.0112	31.243	29.3476	18.0514	37.4372	72.1554	19.663	22.563	24.574	63.7168	39.7709	43.622	28.6658	34.425
Pachypsylla_venusta	32.4792	29.1323	23.8945	26.0647	33.3367	22.9781	39.5833	31.5297	18.0845	27.9243	26.6867	9.09468	24.9509	14.3537	14.2554	22.4574	35.7289	17.0999	11.6694	24.992	19.0817	43.5306	24.354	32.7611	18.7444	17	25.2078	136.77	24.1881	27.6212	10.1088	17.3489	36.0777	22.3443	14.3583	25.5191	58.5154	23.0671	26.8443	27.6773	37.5545
Venturia_pyrina	2.86581	11.277	2.07779	11.0274	11.4595	3.28258	9.46558	4.97837	6.78169	10.8094	2.66867	3.89772	3.80607	4.41654	9.00343	3.62215	1.88047	3.20623	3.3341	1.08661	12.0516	19.5137	10.4374	25.3898	4.46295	5	4.03324	13.4844	2.01568	6.90531	12.997	3.65241	3.00648	4.46886	5.12796	8.50637	20.8055	18.2946	7.8296	7.90781	4.17272
Lactuca_sativa	44.8978	67.662	39.478	57.1419	78.133	40.4851	35.2808	77.9944	27.1267	63.0548	68.051	19.4886	56.6682	41.9571	39.7652	47.8124	45.1312	49.1622	41.6763	32.5983	32.1376	93.816	68.8871	69.6172	48.1999	41	43.3574	98.2433	53.4154	65.6005	38.269	50.2206	127.775	43.7949	32.8189	52.9285	143.038	50.1114	69.3479	62.274	59.4613
Fomitiporia_mediterranea	13.3738	16.9155	5.19447	3.00747	15.6266	17.5071	7.74457	16.5946	6.78169	9.00782	26.6867	3.89772	1.69159	4.41654	95.2863	12.3153	3.76094	6.41246	6.66821	8.69289	3.0129	10.5074	9.7416	8.19026	6.24813	10	15.1247	10.5949	5.03919	8.63164	7.94263	6.39171	10.5227	4.46886	14.3583	2.83546	27.3072	7.15877	30.1999	23.7234	7.30226
Phalaenopsis_equestris	18.1502	23.4938	19.739	26.0647	28.1279	16.4129	27.5362	24.8918	9.04225	36.9321	22.6837	19.4886	19.4533	7.72894	20.2577	15.9375	22.5656	16.0312	9.16878	18.4724	23.0989	33.7738	34.0956	27.0279	21.4222	11	21.1745	48.1585	18.1411	18.9896	12.275	35.611	30.0648	10.7253	12.3071	26.4643	76.7202	27.0442	27.9628	31.6312	22.95
Myodes_glareolus	1938.25	2464.97	1982.21	2171.39	2381.49	2360.17	2205.48	2278.43	1698.44	2175.39	2539.24	2125.56	2125.9	1815.2	2230.6	2290.65	1957.57	1909.84	2011.3	1763.57	2047.77	2653.87	2337.98	2099.98	2210.05	1919	1957.13	3018.57	2140.65	2287.38	1824.64	1947.65	2026.36	1782.18	2144.51	2356.26	2789.24	2360.01	2652	2360.48	1923.62
Sarcophilus_harrisii	1788.27	4931.81	3059.54	2606.47	3978.53	4287.05	3925.63	4674.69	1984.02	2602.36	4654.15	2037.21	2526.39	2670.9	4219.61	3672.14	2252.8	3206.23	3514.14	2763.25	2944.6	4295.27	4376.76	2467.73	3275.81	2018	4433.54	6816.35	2728.22	3611.48	2040.53	2740.22	2257.86	2684.89	2858.32	4505.54	5239.08	3714.61	5497.5	5684.73	2664.28
Delftia_lacustris	19.1054	7.518	42.5946	3.00747	57.2975	94.1006	12.0471	131.097	13.5634	66.6579	114.753	36.3787	30.8715	20.9786	30.7617	78.9629	24.4461	38.4748	39.1757	24.992	3.0129	7.50528	5.56663	9.82832	77.6554	32	39.3241	4.81585	18.1411	96.6744	10.1088	5.47861	49.6069	3.57509	43.0748	1.8903	120.932	23.8626	53.6887	71.1703	4.17272
Methylobacterium_sp._13MFTsu3.1M2	14.3291	0.93975	9.35004	0	27.0861	26.2606	2.58152	24.8918	17.331	18.9164	34.6927	7.79544	9.30374	3.3124	8.25315	20.2841	13.1633	7.48121	12.5029	9.7795	2.0086	0.750528	4.17497	6.55221	23.2074	10	8.06648	0.96317	6.04703	12.0843	5.0544	1.8262	15.0324	0	17.4351	0	33.8089	11.1359	21.2518	11.8617	0
Ophiocordyceps_polyrhachis-furcata	1.91054	25.3733	5.19447	13.0324	14.5848	6.56516	12.0471	9.95674	4.52112	11.7102	21.3493	2.59848	3.38318	6.62481	7.50286	5.07102	3.76094	6.41246	9.16878	4.34644	6.02579	17.2622	16.6999	18.0186	11.6037	4	5.04155	18.3002	6.04703	17.2633	2.88823	9.13102	3.00648	5.36264	3.07677	24.574	53.3141	2.38626	16.7777	14.8271	3.12954
Rhinopithecus_roxellana	17103.2	15881.8	16135.1	16354.6	18369.6	18155.9	14005.6	17663.3	15930.9	17229.3	15558.3	17691.7	18865	17930	16065.9	17468.9	16984.4	18449.7	18764.3	18459.3	15119.7	15153.2	14463.5	19024.3	18990.8	17832	15217.4	15227.7	18114.9	18628.8	15276.6	14668.1	17935.1	14123.4	17657.6	17229.2	17332.3	17741.8	16306.8	15945.1	14619.1
Coniochaeta_ligniaria	0.955271	0.93975	4.15557	2.00498	2.08355	1.09419	0.860507	1.65946	0.753521	2.70235	1.33433	0	1.26869	2.20827	3.00114	3.62215	0	1.06874	0.833526	2.17322	2.0086	6.00423	3.47914	3.27611	0.892591	232	0	0.96317	1.00784	3.45266	0.722057	1.8262	0	0	1.02559	0	5.20137	7.95419	1.11851	3.9539	3.12954
Neomonachus_schauinslandi	1184.54	749.921	1157.33	898.231	999.06	928.97	861.368	975.76	1088.08	1298.03	922.024	1330.42	1252.2	1218.96	1098.42	890.325	1229.83	1098.67	1098.59	1138.77	909.895	890.127	1723.57	1049.99	1142.52	1276	984.111	571.16	1209.41	1203.25	921.345	780.702	1168.02	989.407	1347.63	878.992	912.841	1104.04	843.36	852.066	1012.93
Calycopis_cecrops	112.722	85.5173	66.4892	59.1469	85.4254	72.2168	63.6775	112.843	71.5845	97.2845	112.084	128.625	161.97	83.9142	84.032	60.1277	152.318	79.087	72.5167	83.669	46.1977	97.5687	89.7619	73.7124	67.8369	107	75.6233	154.107	109.854	126.022	36.1029	46.5682	144.311	50.0513	100.508	65.2155	114.43	110.563	53.6887	87.9744	62.5908
Pygocentrus_nattereri	90.7508	191.709	127.784	104.259	207.313	125.832	173.822	229.005	76.8591	134.217	225.502	62.3635	104.456	94.9556	158.31	148.508	107.187	141.074	124.195	81.4958	99.4256	228.161	314.515	130.225	113.359	69	160.321	277.393	142.105	170.906	96.7556	144.27	165.356	92.9524	90.2521	138.937	357.594	155.107	184.555	218.453	135.613
Schistosoma_haematobium	20.0607	33.831	21.8168	28.0697	44.7962	30.6374	29.2572	39.8269	12.8099	18.9164	36.027	16.8901	21.5678	6.62481	22.5086	25.3551	16.9242	29.9248	20.0046	14.1259	22.0946	37.5264	48.0122	27.0279	22.3148	6	27.2244	63.5692	13.1019	18.9896	11.5529	15.5227	21.0453	13.4066	7.17914	57.6543	41.611	22.2717	35.7924	38.5506	15.6477
Aspergillus_clavatus	114.633	18.795	146.484	11.0274	52.0887	80.9703	8.60507	94.589	116.042	198.172	44.033	232.564	206.374	147.954	89.284	70.9942	65.8164	71.6058	134.198	123.874	5.02149	10.5074	6.95829	28.6659	107.111	100	89.7396	8.66853	142.105	110.485	25.272	14.6096	157.84	15.1941	208.195	9.45152	66.3175	98.6319	38.0295	40.5275	11.475
Patiriella_regularis	13817	35117.5	31309.1	279.695	32068.9	37250.7	24132.9	39272.7	21499.5	12057.9	39529.6	10260.1	12084.7	19601.7	27711.8	36584.5	15143.4	307.798	340.079	22015.8	17695.7	18376.7	77221	10713.7	13144.3	17596	42428.7	44668.9	350.728	22026.2	15702.6	19879.1	14349.9	16929.8	14118.3	463.125	32037.8	25037.4	43009.1	35948.9	15562.2
Colius_striatus	155.709	201.107	137.134	152.378	218.772	192.578	172.962	262.194	100.218	166.645	233.508	149.413	146.322	134.704	165.813	165.17	188.047	107.943	103.357	128.22	146.628	232.664	352.785	191.652	190.122	169	181.496	255.24	121.948	191.622	119.139	147.922	228.492	156.41	154.864	163.511	263.97	143.971	210.281	216.476	160.65
Nasonia_vitripennis	10.508	11.277	7.27225	10.0249	9.37596	4.37677	4.30254	4.97837	11.3028	11.7102	17.3463	2.59848	10.1495	6.62481	8.25315	9.4176	9.40234	2.13749	3.3341	8.69289	12.0516	12.759	9.04578	6.55221	7.14072	0	6.04986	42.3795	9.07055	10.358	7.94263	8.21791	18.0389	8.93773	3.07677	4.72576	16.9045	7.95419	12.3037	9.88476	10.4318
Leptosomus_discolor	121.319	212.384	147.523	158.393	190.644	176.165	146.286	172.583	103.232	177.454	252.189	133.822	112.068	108.205	184.57	167.343	120.35	98.3244	79.185	119.527	111.477	221.406	224.753	118.759	108.896	103	187.546	306.288	104.815	146.738	91.7012	130.574	139.801	142.11	85.1241	108.693	321.185	142.38	223.703	241.188	97.0158
3300003412_____JGI25912J50252_10000010	125.141	122.168	761.509	48.1195	60.4228	178.353	24.0942	170.924	79.1197	5276.78	25.3523	59.765	15.6472	5.52067	29.2612	28.9772	112.828	63.0559	40.0092	28.2519	88.3783	3483.2	2770.79	43.4084	33.0259	5	6.04986	15.4107	11.0862	110.485	18.7735	26.4799	15.0324	17.8755	22.563	30.2449	3795.7	443.844	46.9776	13.8387	30.2522
Fragaria_x_ananassa	38.2109	37.59	32.2057	41.1021	86.4672	22.9781	32.6993	38.1675	33.1549	30.6266	32.024	68.8597	49.9019	28.7075	30.7617	21.7329	39.4898	25.6498	33.341	34.7715	18.0774	43.5306	36.1831	34.3991	62.4813	40	28.2327	32.7478	43.3371	53.5162	22.3838	55.6992	40.5874	33.9634	31.7933	32.1352	42.9113	35.7938	25.7258	31.6312	63.634
Ralstonia_solanacearum	16.2396	15.9758	27.0112	13.0324	5.20887	35.0142	10.3261	1.65946	40.6901	14.4125	12.009	9.09468	21.5678	16.562	18.0069	26.0795	20.6852	20.3061	10.0023	18.4724	23.0989	8.25581	11.1333	6.55221	8.03332	17	20.1662	24.0792	17.1333	29.3476	41.8793	12.7834	24.0518	2.68132	14.3583	12.287	15.6041	24.658	4.47406	2.96543	12.5182
Drosophila_grimshawi	33.4345	49.8068	28.0501	40.0996	52.0887	19.6955	28.3967	43.1459	24.8662	30.6266	53.3733	24.6856	24.528	33.124	38.2646	26.8039	24.4461	18.1686	30.0069	26.0787	27.1161	55.5391	138.47	36.0372	26.7777	20	29.241	40.4531	32.2508	46.6109	23.1058	36.5241	37.5809	33.9634	15.3839	34.0255	62.4165	31.0213	33.5554	36.5736	26.0795
Ustilaginoidea_virens	4.77636	3.759	2.07779	5.01245	3.12532	2.18839	1.72101	4.97837	6.02817	3.60313	5.33733	5.19696	9.30374	27.6034	15.756	2.17329	3.76094	3.20623	1.66705	1.08661	20.086	5.2537	4.8708	45.0464	7.14072	11	1.00831	3.85268	4.03135	3.45266	5.0544	4.56551	4.50971	1.78755	3.07677	0	7.80206	5.56793	3.35554	12.8502	0
Cupriavidus_gilardii	6.6869	2.81925	5.19447	2.00498	5.20887	9.84774	3.44203	33.1891	0.753521	17.1149	13.3433	6.4962	4.22897	6.62481	6.75257	11.5909	13.1633	4.27497	5.83468	5.43305	1.0043	5.2537	1.39166	0	10.7111	3	13.108	0.96317	5.03919	10.358	4.33234	0	3.00648	3.57509	8.20473	0.945152	22.1058	3.18168	13.4222	8.89628	1.04318
Enterococcus_faecalis	4725.73	14082.2	4503.6	7978.82	13588.9	13086.6	10993	13187.7	5236.22	8080.02	12189.1	6537.77	8975.99	3781.66	11733.7	10903.4	5161.89	4317.72	5726.32	4207.36	8509.42	11636.2	8973.41	7387.62	4813.74	3885	6639.72	17785.9	8116.12	9330.8	6186.58	5999.99	5252.31	7193.98	10115.4	8527.16	11855.2	10949.7	19172.4	15936.2	7065.46
Myotis_lucifugus	4398.07	4989.14	3452.24	4793.91	5276.58	5335.29	4583.92	4804.13	3610.87	4918.27	5963.14	4455.09	4578.28	3915.26	4678.78	4511.03	3900.09	3636.93	3865.89	3774.89	4101.56	6573.88	5483.13	6374.48	5090.44	3937	3334.48	6015.96	4161.37	4574.77	4155.44	4108.04	4249.65	3529.51	4883.87	5247.49	5829.44	4035.95	7987.31	5985.22	3828.47
Anopheles_nili	175.77	411.611	364.652	331.824	275.028	226.498	255.571	302.021	199.683	66.6579	268.201	51.9696	131.521	410.738	295.613	192.699	137.274	57.7122	9.16878	382.487	73.3138	234.165	260.24	131.863	243.677	388	572.72	470.027	44.3449	258.949	119.861	184.447	148.821	216.293	121.02	342.145	282.174	268.056	327.725	273.808	255.579
Oryctes_borbonicus	28.6581	57.3248	31.1668	26.0647	47.9216	39.391	50.7699	51.4431	21.8521	42.3368	49.3703	20.7878	36.792	27.6034	42.7663	26.0795	58.2945	27.7873	25.8393	23.9054	39.1677	77.3044	54.9705	49.1416	33.0259	31	41.3407	146.402	27.2116	53.5162	28.1602	39.2634	61.6328	32.1758	30.7677	36.8609	70.2185	75.5648	42.5035	57.3316	53.2022
Haemonchus_contortus	13.3738	8.45775	11.4278	11.0274	19.7937	12.0361	15.4891	11.6162	6.78169	10.8094	5.33733	3.89772	7.61215	6.62481	12.0046	6.51988	18.8047	9.61869	2.50058	7.60627	6.02579	26.2685	13.2207	11.4664	8.03332	2	10.0831	23.1161	8.06271	10.358	7.22057	7.30481	12.0259	7.15018	3.07677	16.0676	19.5051	8.74961	12.3037	22.7349	9.38862
Lagenaria_siceraria	11.4633	17.8553	17.6612	19.0473	26.0443	10.9419	18.0707	19.9135	15.0704	18.0156	22.6837	7.79544	15.6472	8.83308	15.0057	10.142	11.2828	11.7562	15.837	8.69289	7.03009	27.7695	21.5707	21.2947	9.8185	9	20.1662	33.7109	11.0862	15.537	16.6073	19.1751	48.1036	7.15018	17.4351	8.50637	31.2082	18.2946	16.7777	13.8387	10.4318
Kappaphycus_alvarezii	7.64217	8.45775	9.35004	6.01494	16.6684	6.56516	6.02355	6.63782	1.50704	21.6188	9.34033	7.79544	5.49766	2.20827	6.00229	3.62215	24.4461	7.48121	8.33526	2.17322	5.02149	39.778	21.5707	11.4664	3.57036	6	3.02493	152.181	6.04703	8.63164	5.0544	8.21791	21.0453	2.68132	10.2559	6.61607	44.2117	9.54503	8.94811	4.94238	12.5182
Roseomonas_rosea	0	0	4.15557	6.01494	1.04177	5.47097	0.860507	0	2.26056	1.80156	1.33433	2.59848	0.422897	1.10413	0.750286	0.724431	28.207	2.13749	2.50058	0	3.0129	1.50106	0	6.55221	1.78518	0	4.03324	238.866	2.01568	3.45266	0	0	0	0.893773	2.05118	0.945152	1.30034	8.74961	3.35554	3.9539	0
Ciona_savignyi	56.361	28.1925	24.9334	53.132	84.3836	36.1084	24.9547	33.1891	11.3028	30.6266	53.3733	50.6703	26.6425	24.291	30.7617	21.0085	30.0875	21.3749	14.1699	15.2125	62.2665	111.829	51.4913	91.7309	26.7777	25	28.2327	1996.65	24.1881	117.39	20.2176	62.0909	76.6651	35.7509	19.4862	50.0931	68.9182	44.5435	29.0814	76.1127	117.879
Gasterosteus_aculeatus	115.588	142.842	101.812	161.401	196.895	150.999	148.007	155.989	69.3239	162.141	158.786	132.522	98.9579	81.7059	129.799	160.099	116.589	85.4995	130.864	78.236	114.49	168.118	201.79	165.443	140.137	117	101.839	190.708	113.886	129.475	105.42	114.138	118.756	146.579	132.301	141.773	184.649	96.2457	156.592	151.237	179.427
Loxosceles_reclusa	141.38	205.805	85.1893	142.354	182.31	93.0064	113.587	129.438	73.845	120.705	206.822	92.246	110.376	68.4563	98.2875	101.42	142.916	127.18	78.3514	92.3619	118.507	228.911	164.911	167.081	116.037	94	136.122	484.474	104.815	160.548	80.1483	120.529	236.008	94.7399	58.4587	150.279	358.895	118.517	164.422	136.41	136.657
Cyprinus_carpio	991.572	2316.48	1761.96	984.445	1772.06	1578.92	1807.07	2089.26	4907.68	1007.07	1829.37	802.93	1121.1	1658.41	1968.75	1344.54	962.8	1331.65	2099.65	1673.38	1280.48	1646.66	8268.53	1031.97	1756.62	877	2473.39	2870.25	978.611	1427.67	4603.11	4949.01	1011.68	1469.36	1183.53	1888.41	1981.72	1699.81	2398.09	2492.94	1296.67
Ornithorhynchus_anatinus	1083.28	1203.82	735.537	1126.8	1700.17	1283.49	1014.54	1143.37	635.218	1237.67	1268.95	1013.41	767.558	656.96	919.851	1130.11	718.339	835.758	792.683	707.384	1050.5	1992.65	1542.65	1197.42	936.328	891	999.236	1771.27	831.467	2145.83	829.644	1092.98	1186.05	994.769	918.93	1296.75	1586.42	1099.27	1392.55	1733.79	1674.3
Beta_vulgaris	35.345	43.2285	34.2835	31.0772	57.2975	28.449	24.9547	33.1891	24.1127	49.543	52.039	16.8901	35.5234	25.3951	186.821	31.875	67.6969	35.2685	30.8405	24.992	34.1462	78.0549	96.7202	62.246	31.2407	26	42.349	65.4955	26.2038	44.8845	20.9397	35.611	63.136	26.8132	29.7422	28.3546	101.427	65.2243	40.2665	41.516	18.7772
Coniophora_puteana	20.0607	36.6503	32.2057	25.0622	38.5456	36.1084	36.1413	58.081	24.1127	21.6188	54.7077	18.1894	16.493	37.5406	35.2634	40.5681	16.9242	43.8185	46.6774	54.3305	31.1333	34.5243	53.5788	22.9327	24.9925	31	59.4903	72.2377	27.2116	22.4423	20.2176	34.6979	15.0324	25.0256	16.4095	44.4222	55.9147	55.6793	31.3184	65.2394	18.7772
Basidioascus_undulatus	26.7476	20.6745	19.739	17.0423	17.7101	21.8839	24.9547	14.9351	20.3451	18.0156	34.6927	22.0871	27.4883	18.7703	28.5109	18.1108	24.4461	18.1686	19.1711	22.8188	18.0774	24.7674	25.7457	13.1044	22.3148	12	16.133	23.1161	20.1568	36.2529	10.8309	20.0882	15.0324	23.2381	13.3327	24.574	29.9079	27.0442	31.3184	26.6889	18.7772
Drosophila_yakuba	15.2843	18.795	10.3889	20.0498	16.6684	6.56516	6.88406	13.2756	3.7676	23.4203	16.012	9.09468	10.1495	5.52067	11.2543	5.07102	15.0437	12.8249	9.16878	7.60627	8.03439	28.5201	86.9786	17.1996	41.9518	3	7.05817	58.7534	8.06271	18.9896	3.61029	12.7834	19.5421	5.36264	15.3839	5.67091	23.4062	15.113	8.94811	13.8387	13.5613
Klebsormidium_nitens	0.955271	0.93975	3.11668	1.00249	7.29241	2.18839	0.860507	4.97837	0.753521	8.10704	8.006	3.89772	2.11449	3.3124	22.5086	2.89772	0	1.06874	4.16763	11.9527	3.0129	14.26	4.8708	3.27611	14.2814	2	8.06648	6.74219	1.00784	3.45266	1.44411	0	13.5291	1.78755	3.07677	0	6.50171	86.7006	14.5407	9.88476	4.17272
Mesorhizobium_sp._LNJC395A00	39.1661	24.4335	22.8557	22.0548	34.3785	17.5071	24.9547	19.9135	23.3591	31.5274	13.3433	24.6856	53.7079	18.7703	36.0137	19.5596	45.1312	30.9936	11.6694	23.9054	36.1548	6.75476	8.34995	19.6566	12.4963	22	17.1413	10.5949	45.3527	25.8949	18.0514	16.4358	43.5939	38.4322	46.1516	27.4094	16.9045	22.2717	20.1333	9.88476	44.8568
Teleopsis_dalmanni	89.7955	94.9148	75.8392	96.239	159.391	59.0864	110.145	99.5674	49.7324	79.2688	120.09	41.5757	63.4346	33.124	90.7846	65.1988	78.9797	73.7433	59.1803	49.9841	62.2665	123.837	90.4578	108.93	56.2332	57	98.8144	209.008	87.682	141.559	39.7131	93.1364	181.892	68.8205	47.1772	85.0637	149.539	66.8152	92.8367	114.663	114.75
Fukomys_damarensis	8414.99	5949.56	6609.44	7707.14	6531.92	6352.89	6670.65	5831.33	6945.95	6869.37	6406.13	7722.68	7964.42	8000.56	6607.77	6490.17	8834.44	7287.76	6748.22	7642.13	8146.87	6581.38	8036.82	7864.29	7077.35	8721	5725.19	5108.65	8003.25	8067.13	7494.95	6811.74	8551.92	7416.53	7152.48	6205.87	6436.7	7566.02	5344.26	5564.13	7998.06
Fonticula_alba	410.767	667.223	346.99	361.899	692.779	1069.03	333.016	504.475	729.408	296.357	1593.19	469.026	951.941	877.787	1525.33	998.99	377.974	439.254	449.27	1027.93	437.874	1285.66	878.136	704.363	802.439	372	381.141	2156.54	482.755	585.225	246.944	715.872	724.561	1004.6	1074.82	513.218	596.857	948.935	2493.17	1435.27	994.151
Mesorhizobium_sp._LNHC252B00	54.4505	81.7583	41.5557	10.0249	75.0077	153.187	49.0489	131.097	97.2042	22.5196	96.072	15.5909	46.9416	61.8315	108.041	39.1193	16.9242	34.1998	46.6774	41.2912	150.645	75.8034	59.1455	44.2274	54.448	25	55.4571	142.549	45.3527	44.8845	18.7735	38.3503	40.5874	51.8388	45.126	15.1224	72.8192	15.9084	99.5477	36.5736	63.634
Pseudoperonospora_cubensis	3.82109	10.3373	10.3889	3.00747	18.7519	13.1303	10.3261	14.9351	2.26056	11.7102	16.012	12.9924	7.61215	13.2496	36.764	13.0398	9.40234	13.8937	6.66821	6.51966	6.02579	7.50528	4.8708	6.55221	12.4963	8	13.108	59.7165	15.1176	12.0843	10.1088	10.9572	12.0259	8.93773	14.3583	11.3418	23.4062	23.8626	15.6592	12.8502	8.34544
Chlamydomonas_asymmetrica	15.2843	4.69875	47.7891	7.01743	31.2532	14.2245	2.58152	4.97837	16.5775	46.8407	14.6777	23.3863	46.5187	41.9571	24.0092	20.2841	22.5656	19.2374	24.1722	34.7715	1.0043	15.7611	12.5249	5.73318	16.9592	36	36.2992	14.4475	28.2195	8.63164	6.49851	3.65241	22.5486	2.68132	43.0748	4.72576	19.5051	17.4992	21.2518	3.9539	4.17272
Anisakis_simplex	3.82109	10.3373	3.11668	7.01743	9.37596	4.37677	4.30254	11.6162	3.01408	3.60313	12.009	6.4962	8.03504	4.41654	4.50172	3.62215	15.0437	8.54995	7.50173	3.25983	6.02579	7.50528	13.9166	11.4664	2.67777	3	9.07479	3.85268	5.03919	12.0843	4.33234	5.47861	22.5486	8.04396	11.2815	6.61607	13.0034	9.54503	7.8296	7.90781	7.30226
Aptenodytes_forsteri	67.8243	117.469	96.6171	1811.5	87.5089	107.231	92.9348	147.692	56.5141	86.4751	158.786	38.9772	63.0117	73.977	108.791	79.6874	69.5773	75.8808	109.192	58.677	68.2923	140.349	202.486	76.9885	78.548	63	112.931	190.708	83.6506	91.4954	59.9307	85.8316	93.2008	70.6081	84.0985	125.705	179.447	72.3831	136.459	139.375	86.584
Candidatus_Contendobacter_odensis	33.4345	80.8185	74.8003	12.0299	82.3001	106.137	55.0725	97.9079	39.9366	51.3446	77.3913	48.0719	67.6635	35.3323	72.7777	105.767	41.3703	44.8872	13.3364	40.2046	39.1677	66.797	53.5788	25.3898	48.1999	40	85.7064	97.2802	83.6506	53.5162	43.3234	28.3062	55.6198	40.2198	57.4331	18.903	61.1161	68.406	149.881	91.9283	43.8136
Tupaia_chinensis	4827.94	3757.12	4571.13	4677.62	3751.42	3818.73	3601.22	3800.15	4319.93	4306.64	3533.31	4757.82	5123.4	5006.15	3668.15	3942.35	4970.08	4470.55	3882.56	4565.94	4242.16	3853.21	3409.56	4396.53	4456.7	4886	3842.67	3470.3	4857.78	4819.91	4418.99	3964.69	4748.73	4068.45	4274.67	3843.93	3855.52	4507.64	3353.3	3122.6	4332.33
Sporophila_hypoxantha	161.441	337.37	259.723	73.1818	311.49	298.715	256.431	270.491	124.331	164.843	346.927	146.814	155.203	242.91	324.874	245.582	169.242	121.837	80.852	240.141	223.959	285.951	1740.27	156.434	370.425	272	388.2	444.021	116.909	272.76	117.695	230.102	213.46	175.179	166.146	93.5701	348.492	232.262	366.873	445.803	202.377
Rhodnius_prolixus	451.843	992.376	412.441	131.326	652.15	692.624	901.812	645.528	426.493	221.592	998.081	205.28	228.364	389.759	732.279	557.812	351.648	49.1622	83.3526	339.023	592.536	781.3	853.086	324.334	502.529	425	611.036	1508.32	65.5095	597.309	257.052	547.861	371.3	631.897	262.551	152.17	1100.09	522.59	847.834	1579.58	530.979
Dermatophagoides_farinae	14.3291	15.036	9.35004	5.01245	13.543	5.47097	12.0471	14.9351	5.27465	3.60313	13.3433	7.79544	10.9953	4.41654	4.50172	10.8665	5.64141	9.61869	9.16878	7.60627	4.0172	23.2664	29.2248	16.3805	11.6037	11	12.0997	43.3426	8.06271	20.7159	5.0544	5.47861	21.0453	7.15018	7.17914	15.1224	16.9045	14.3175	12.3037	25.7004	14.6045
Papilio_xuthus	21.9712	27.2528	21.8168	31.0772	23.9608	15.3187	15.4891	29.8702	9.79577	22.5196	34.6927	19.4886	29.1799	11.0413	16.5063	10.8665	31.968	17.0999	17.504	16.2992	16.0688	30.7717	29.2248	26.2088	17.8518	14	23.1911	41.4163	16.1254	51.7898	10.1088	29.2193	40.5874	18.7692	19.4862	24.574	54.6144	22.2717	25.7258	27.6773	12.5182
3300005935_____Ga0075125_10000004	0.955271	6.57825	6.23336	11.0274	8.33418	6.56516	12.9076	8.29728	9.04225	9.9086	8.006	9.09468	8.03504	8.83308	6.00229	7.96874	0	4.27497	0.833526	5.43305	12.0516	5.2537	11.1333	4.91416	0	6	12.0997	3.85268	13.1019	13.8106	7.94263	4.56551	6.01295	7.15018	4.10237	4.72576	11.7031	5.56793	5.59257	3.9539	7.30226
Drosophila_sechellia	3.82109	10.3373	4.15557	2.00498	13.543	12.0361	7.74457	3.31891	3.01408	11.7102	10.6747	9.09468	8.03504	5.52067	9.75372	7.96874	9.40234	2.13749	9.16878	3.25983	5.02149	27.019	209.444	10.6473	19.637	1	9.07479	143.512	4.03135	10.358	1.44411	10.9572	18.0389	8.93773	3.07677	17.9579	16.9045	7.95419	6.71108	8.89628	12.5182
Methylobacterium_sp._B34	8.59744	0.93975	8.31115	0	20.8355	42.6735	9.46558	41.4864	29.3873	27.0235	77.3913	12.9924	7.18925	5.52067	9.00343	28.9772	13.1633	11.7562	15.0035	9.7795	0	3.00211	5.56663	4.91416	13.3889	6	16.133	1.92634	10.0784	15.537	13.7191	4.56551	28.5615	1.78755	25.6398	1.8903	55.9147	11.1359	23.4888	17.7926	2.08636
Tauraco_erythrolophus	87.885	209.564	129.862	109.271	203.146	135.68	148.007	154.329	67.8169	138.72	172.129	94.8445	128.561	71.7687	146.306	126.051	131.633	86.5682	94.1884	74.9761	97.417	209.397	433.501	95.8261	136.566	66	165.363	236.94	123.964	132.927	82.3145	98.615	129.278	117.978	177.427	106.802	270.471	103.404	267.325	178.914	110.577
Zea_mays	55.4057	135.324	64.4114	100.249	105.219	65.6516	98.9583	79.6539	44.4577	104.491	114.753	46.7726	75.6986	30.9158	76.5292	51.4346	77.0992	65.1934	44.1769	51.0707	75.3224	140.349	187.178	116.302	124.963	45	72.5984	229.234	86.6741	124.296	63.541	93.1364	102.22	66.1392	75.8938	127.596	205.454	76.3602	137.577	89.9513	57.3749
Anopheles_dirus	24.8371	38.5298	25.9723	39.0971	27.0861	18.6013	36.1413	29.8702	28.6338	23.4203	38.6957	25.9848	30.4486	26.4992	23.2589	28.2528	30.0875	27.7873	24.1722	20.6456	17.0731	56.2896	45.9247	31.942	22.3148	19	38.3158	44.3058	25.196	17.2633	19.4955	28.3062	31.568	48.2637	28.7166	30.2449	62.4165	31.8168	19.0147	22.7349	32.3386
Enterobacter_sp._T1-1	6.6869	4.69875	7.27225	6.01494	8.33418	5.47097	3.44203	8.29728	6.02817	11.7102	8.006	5.19696	13.5327	2.20827	5.252	5.07102	11.2828	8.54995	3.3341	5.43305	5.02149	7.50528	2.08749	4.91416	12.4963	10	10.0831	1.92634	13.1019	8.63164	10.8309	1.8262	9.01943	4.46886	16.4095	4.72576	5.20137	0.795419	5.59257	3.9539	11.475
Arthrobotrys_oligospora	2.86581	15.036	5.19447	21.0523	15.6266	4.37677	9.46558	14.9351	0.753521	15.3133	32.024	5.19696	8.03504	3.3124	17.2566	4.34658	1.88047	5.34372	9.16878	8.69289	7.03009	21.0148	13.2207	25.3898	24.0999	3	11.0914	31.7846	5.03919	20.7159	4.33234	8.21791	3.00648	7.15018	4.10237	19.8482	22.1058	6.36335	23.4888	20.758	8.34544
Sordaria_macrospora	18.1502	6.57825	15.5834	14.0349	9.37596	1.09419	9.46558	6.63782	18.0845	9.00782	2.66867	19.4886	12.264	22.0827	9.00343	11.5909	22.5656	7.48121	7.50173	17.3858	5.02149	6.00423	13.2207	8.19026	7.14072	28	13.108	10.5949	11.0862	6.90531	7.22057	21.9144	13.5291	8.04396	8.20473	7.56122	5.20137	21.4763	7.8296	3.9539	7.30226
Heliconius_hecale	9.55271	14.0963	5.19447	5.01245	10.4177	8.75355	7.74457	4.97837	4.52112	3.60313	8.006	5.19696	8.03504	4.41654	8.25315	5.79545	5.64141	1.06874	5.00115	4.34644	8.03439	12.759	3.47914	14.7425	3.57036	3	5.04155	19.2634	4.03135	6.90531	7.94263	2.7393	9.01943	1.78755	16.4095	10.3967	19.5051	8.74961	14.5407	14.8271	5.2159
Micromonas_pusilla	29.6134	0	19.739	0	11.4595	4.37677	0.860507	3.31891	16.5775	18.9164	8.006	23.3863	18.1846	23.1868	18.0069	7.96874	22.5656	22.4436	11.6694	16.2992	0	0	1.39166	0	4.46295	20	13.108	0.96317	18.1411	12.0843	2.16617	0.913102	7.51619	0	16.4095	0.945152	5.20137	22.2717	8.94811	4.94238	0
Proteus_hauseri	56.361	40.4093	57.1391	18515	23.9608	53.6155	66.2591	151.011	33.9084	21.6188	140.105	5.19696	9.72663	101.58	7.50286	34.7727	75.2187	26185.3	26449.4	27.1653	19731.5	57.7907	7.65412	24.5708	49.9851	90	29.241	33.7109	17875	17.2633	19.4955	1.8262	19.5421	16.9817	56.4075	29710.9	27.3072	3.97709	44.7406	15.8156	64.6772
3300005683_____Ga0074432_100433	0.955271	31.0118	6.23336	4.00996	21.8772	33.92	0.860507	21.5729	17.331	11.7102	4.003	16.8901	3.38318	0	9.00343	8.69317	9.40234	3.20623	14.1699	8.69289	20.086	24.0169	18.0916	6.55221	13.3889	2	1.00831	5.77902	1.00784	32.8002	4.33234	10.9572	1.50324	0.893773	2.05118	1.8903	22.1058	2.38626	1.11851	2.96543	12.5182
Orcinus_orca	2765.51	5294.55	3282.9	3510.72	5068.23	4788.19	3927.36	4834	2750.35	2481.66	5299.97	2842.74	3730.8	3613.83	5520.6	4700.11	2647.7	4146.73	3907.57	3967.22	3563.25	5114.85	5442.77	3027.12	3680.15	2927	4487.99	6854.88	3352.07	4272.66	2530.81	3351.08	2773.47	3524.15	3744.43	4800.43	4789.16	6165.29	6898.99	7782.27	3534.3
Ficus_carica	14.3291	28.1925	14.5445	22.0548	29.1696	18.6013	11.1866	31.5297	11.3028	20.718	25.3523	3.89772	13.9556	6.62481	15.0057	13.7642	26.3266	13.8937	14.1699	16.2992	14.0602	33.0232	27.8332	18.0186	9.8185	26	17.1413	41.4163	23.1803	13.8106	15.1632	20.0882	24.0518	20.5568	8.20473	21.7385	55.9147	21.4763	27.9628	24.7119	15.6477
Delphinapterus_leucas	2457.91	3190.45	2100.64	2828.02	3110.73	2765.03	2829.35	2932.26	1912.44	2032.16	2912.85	2115.16	2307.33	2006.21	2820.33	2720.24	2322.38	2778.73	2509.75	2325.35	2637.29	3396.89	3101.31	2886.25	2743.82	2051	2627.66	3821.86	2318.03	2810.46	2078.08	2668.08	2251.85	2181.7	2217.33	2963.05	3660.46	3566.66	3641.88	4363.13	2426.44
Tepidimonas_fonticaldi	9.55271	6.57825	9.35004	2.00498	27.0861	22.9781	4.30254	14.9351	6.02817	20.718	25.3523	11.6932	11.8411	5.52067	15.0057	13.0398	11.2828	12.8249	15.0035	18.4724	5.02149	6.00423	4.17497	5.73318	55.3406	18	14.1163	1.92634	7.05487	10.358	10.1088	5.47861	13.5291	0.893773	15.3839	4.72576	29.9079	38.1801	23.4888	29.6543	2.08636
Rhizophagus_irregularis	16.2396	9.3975	8.31115	7.01743	13.543	9.84774	4.30254	21.5729	5.27465	10.8094	6.67167	5.19696	8.03504	0	16.5063	6.51988	7.52187	13.8937	9.16878	6.51966	10.043	10.5074	12.5249	11.4664	10.7111	3	11.0914	25.0424	8.06271	12.0843	5.77646	9.13102	12.0259	5.36264	3.07677	11.3418	16.9045	14.3175	8.94811	10.8732	11.475
Stylophora_pistillata	18.1502	16.9155	20.7779	8.01992	19.7937	9.84774	14.6286	24.8918	9.79577	18.0156	16.012	6.4962	15.2243	7.72894	12.0046	11.5909	18.8047	7.48121	8.33526	10.8661	16.0688	27.7695	25.0498	21.2947	16.0666	11	17.1413	28.8951	22.1724	17.2633	7.94263	20.0882	36.0777	5.36264	9.23032	12.287	31.2082	9.54503	15.6592	12.8502	15.6477
Herbaspirillum_huttiense	7.64217	5.6385	8.31115	1.00249	15.6266	20.7897	6.02355	11.6162	0.753521	18.0156	18.6807	5.19696	11.4182	3.3124	6.00229	17.3863	11.2828	7.48121	9.16878	10.8661	2.0086	10.5074	5.56663	10.6473	23.2074	6	9.07479	6.74219	12.0941	10.358	7.22057	5.47861	0	3.57509	8.20473	0	13.0034	7.95419	21.2518	21.7465	2.08636
Amphimedon_queenslandica	7.64217	24.4335	12.4667	17.0423	36.4621	12.0361	21.5127	28.2108	7.53521	20.718	29.3553	7.79544	10.9953	8.83308	10.504	13.0398	16.9242	14.9624	11.6694	14.1259	8.03439	35.2748	16.0041	19.6566	13.3889	11	12.0997	50.0848	7.05487	22.4423	11.5529	10.9572	19.5421	8.93773	8.20473	28.3546	42.9113	10.3404	26.8443	15.8156	10.4318
Caenorhabditis_briggsae	5.73163	8.45775	2.07779	11.0274	9.37596	5.47097	6.88406	8.29728	0.753521	9.9086	8.006	3.89772	7.61215	3.3124	3.75143	2.89772	9.40234	5.34372	5.83468	4.34644	5.02149	12.759	13.9166	10.6473	6.24813	4	4.03324	80.9063	3.02352	1.72633	7.22057	12.7834	7.51619	2.68132	6.15355	6.61607	15.6041	7.95419	10.0666	5.93086	3.12954
Terrabacter_sp._28	752.754	313.877	693.981	352.876	2245.02	760.464	257.292	479.583	936.626	1216.96	697.856	1816.34	698.626	748.603	534.204	777.314	754.068	639.109	567.631	647.62	508.175	100.571	190.657	252.26	464.147	1709	740.1	249.461	783.091	3768.57	782.71	406.33	2187.21	419.179	999.952	219.275	1076.68	641.108	269.562	639.544	444.395
Macaca_mulatta	10991.4	10806.2	10698.5	10787.8	12603.4	13200.3	9773.64	11916.6	10358.6	13702.7	11073.6	12733.8	12168.4	10764.2	10589.5	12216.8	11239.6	11719.8	11026.7	10744.4	10656.6	11315	9936.44	12496.7	14219	11343	10331.1	9529.6	12122.3	11796	10818.6	10409.4	11789.9	9765.36	12105.1	10051.7	12194.6	10163.1	10521.9	9651.48	10174.1
Escherichia_coli	2585.92	1439.7	3012.79	1965.88	1008.44	1689.43	1542.89	1730.81	2558.2	1867.32	1240.93	2508.83	2172.85	1566.77	1120.93	1774.86	1590.88	2958.28	1739.57	1610.36	2071.87	630.444	414.018	996.755	1840.52	3199	2349.36	2485.94	3134.38	1220.51	2300.47	2014.3	2695.31	1311.16	2436.81	1222.08	1313.35	2402.16	852.308	1155.53	2519.28
Soboliphyme_baturini	21.9712	45.108	5.19447	23.0573	12.5013	3.28258	28.3967	14.9351	4.52112	2.70235	9.34033	6.4962	10.5724	8.83308	8.25315	5.79545	13.1633	10.6874	3.3341	4.34644	29.1247	45.7822	20.8749	33.5801	7.14072	6	12.0997	77.0536	9.07055	12.0843	2.16617	8.21791	21.0453	24.1319	4.10237	44.4222	20.8055	8.74961	11.1851	9.88476	25.0363
Bradyrhizobium_sp._WSM3983	13.3738	6.57825	0	11.0274	11.4595	24.0723	18.9312	26.5513	12.8099	34.2297	28.021	6.4962	10.5724	4.41654	4.50172	15.213	3.76094	10.6874	7.50173	3.25983	0	4.50317	13.9166	19.6566	3.57036	5	17.1413	1.92634	3.02352	22.4423	12.275	3.65241	18.0389	3.57509	11.2815	0.945152	22.1058	6.36335	20.1333	25.7004	3.12954
Oidiodendron_maius	2.86581	6.57825	5.19447	1.00249	6.25064	1.09419	5.16304	1.65946	6.02817	2.70235	9.34033	0	5.49766	2.20827	85.5326	9.4176	11.2828	3.20623	1.66705	5.43305	5.02149	9.00634	6.95829	1.63805	0.892591	0	7.05817	12.5212	1.00784	5.17898	5.0544	1.8262	7.51619	1.78755	8.20473	1.8903	11.7031	15.9084	1.11851	0.988476	8.34544
Enhydra_lutris	4704.71	4214.78	4043.37	4383.89	4472.33	4464.31	4252.63	4633.2	3640.26	4608.4	4309.9	4894.24	4774.51	4322.69	4246.62	4382.81	4616.55	4372.23	4267.65	3968.3	4548.47	4587.98	4262.65	4837.17	4297.82	4665	4011.06	4156.08	4467.75	4790.56	4119.34	3961.03	4550.3	4290.11	4446.97	4346.76	4754.05	4620.59	4177.65	4287.02	4712.05
Ralstonia_insidiosa	9.55271	3.759	8.31115	5.01245	31.2532	33.92	12.0471	61.3999	5.27465	36.0313	46.7017	25.9848	9.72663	7.72894	10.504	26.0795	11.2828	6.41246	14.1699	10.8661	3.0129	5.2537	4.17497	12.2854	26.7777	8	16.133	3.85268	8.06271	20.7159	10.1088	3.65241	18.0389	0.893773	12.3071	0.945152	36.4096	17.4992	24.6073	26.6889	4.17272
Selaginella_kraussiana	11.4633	3.759	7.27225	4.00996	6.25064	15.3187	3.44203	6.63782	14.3169	8.10704	2.66867	3.89772	10.1495	9.93721	5.252	15.213	13.1633	11.7562	0.833526	4.34644	7.03009	7.50528	6.26246	5.73318	3.57036	12	11.0914	17.3371	11.0862	8.63164	13.7191	2.7393	13.5291	4.46886	9.23032	2.83546	7.80206	9.54503	3.35554	1.97695	2.08636
Phaethon_lepturus	124.185	198.287	122.589	170.423	207.313	186.013	172.101	215.729	112.275	160.339	206.822	123.428	110.799	96.0597	162.812	131.122	154.198	111.149	130.864	128.22	127.546	234.915	222.665	135.958	159.774	106	159.313	353.483	125.98	186.443	91.7012	166.185	187.905	135.853	103.585	145.553	291.277	147.948	196.858	229.326	138.743
Atalantia_buxifolia	7.64217	17.8553	9.35004	17.0423	17.7101	5.47097	7.74457	26.5513	15.8239	18.9164	18.6807	6.4962	17.3388	11.0413	22.5086	10.142	11.2828	11.7562	9.16878	10.8661	12.0516	16.5116	16.0041	20.4757	16.9592	10	8.06648	36.6005	15.1176	25.8949	12.275	18.262	36.0777	8.04396	14.3583	6.61607	28.6075	14.3175	10.0666	17.7926	10.4318
Helianthus_annuus	293.268	807.246	370.885	599.489	667.777	812.986	499.955	711.907	333.81	558.485	675.173	261.147	299.834	242.91	399.902	552.016	315.919	399.71	478.444	352.062	384.646	949.418	748.712	801.827	1115.74	242	536.421	974.728	313.438	485.098	457.062	486.683	469.01	221.656	433.825	635.142	1012.97	340.439	1005.54	610.878	259.752
Trifolium_subterraneum	22.9265	30.072	27.0112	39.0971	45.838	19.6955	30.1178	28.2108	12.8099	43.2375	44.033	14.2916	30.4486	12.1455	22.5086	23.9062	39.4898	14.9624	22.5052	17.3858	31.1333	71.3002	67.4954	36.0372	22.3148	20	21.1745	47.1953	24.1881	39.7055	19.4955	38.3503	49.6069	27.707	28.7166	29.2997	76.7202	35.7938	27.9628	29.6543	29.2091
Pan_paniscus	193832	146778	180211	149722	117808	108321	197936	113324	104604	137372	151149	116552	116209	110684	110908	106656	151406	117425	157933	107059	111863	110978	103392	111081	123055	207137	215387	98974.4	123863	140577	166326	103336	118813	103346	119181	155180	136946	108501	146207	103072	106475
Drosophila_eugracilis	11.4633	35.7105	19.739	26.0647	263.569	24.0723	30.1178	194.156	22.6056	28.825	224.168	33.7802	194.956	17.6662	215.332	21.0085	165.481	16.0312	14.1699	13.0393	19.0817	48.0338	45.2289	22.1137	21.4222	15	14.1163	56.827	155.207	169.18	21.6617	22.8275	105.227	21.4505	176.402	29.2997	247.065	19.8855	352.332	21.7465	17.7341
Anopheles_atroparvus	15.2843	27.2528	14.5445	15.0373	16.6684	13.1303	21.5127	26.5513	11.3028	18.0156	26.6867	11.6932	18.6075	16.562	16.5063	15.9375	15.0437	11.7562	10.0023	13.0393	10.043	35.2748	28.529	19.6566	16.0666	14	18.1496	32.7478	19.1489	18.9896	10.8309	12.7834	15.0324	9.8315	19.4862	16.0676	41.611	15.9084	26.8443	16.8041	13.5613
Bombyx_huttoni	42.9872	85.5173	27.0112	61.1519	76.0494	50.3329	79.1667	82.9728	24.1127	41.436	78.7257	33.7802	49.9019	19.8744	46.5177	46.3636	41.3703	30.9936	32.5075	22.8188	35.1505	94.5666	75.8453	57.3318	46.4147	35	45.374	113.654	36.2822	60.4215	31.7705	39.2634	69.1489	32.1758	35.8957	60.4898	111.829	52.4976	67.1108	45.4699	52.159
Bradyrhizobium_sp._Gha	14.3291	1.8795	0	6.01494	10.4177	5.47097	11.1866	26.5513	12.8099	20.718	14.6777	11.6932	9.72663	1.10413	6.00229	13.7642	9.40234	6.41246	6.66821	7.60627	1.0043	10.5074	9.04578	18.0186	3.57036	2	20.1662	2.88951	6.04703	10.358	9.38674	4.56551	6.01295	0.893773	12.3071	0	23.4062	1.59084	8.94811	10.8732	0
Fusarium_langsethiae	3.82109	0.93975	0	17.0423	6.25064	16.4129	1.72101	36.508	3.7676	9.9086	5.33733	6.4962	4.65187	0	18.0069	11.5909	1.88047	12.8249	18.3376	2.17322	4.0172	28.5201	16.6999	2.45708	19.637	2	0	60.6797	9.07055	8.63164	6.49851	5.47861	10.5227	0	3.07677	24.574	1.30034	3.97709	15.6592	4.94238	2.08636
Tinamus_guttatus	185.323	370.262	242.062	270.672	241.691	320.599	290.851	378.356	190.641	214.386	384.288	179.295	200.03	192.119	279.857	299.914	184.286	218.024	267.562	224.928	241.032	338.488	304.773	224.413	203.511	134	272.244	526.854	217.693	283.118	168.239	234.667	255.55	210.037	205.118	367.664	422.611	346.007	384.769	457.664	237.845
Candidatus_Kryptobacter_tengchongensis	12.4185	8.45775	9.35004	3.00747	25.0026	9.84774	13.7681	6.63782	5.27465	9.9086	9.34033	12.9924	14.8014	11.0413	18.0069	10.142	5.64141	9.61869	11.6694	19.559	7.03009	6.00423	8.34995	6.55221	15.174	11	19.1579	8.66853	13.1019	17.2633	6.49851	18.262	16.5356	4.46886	8.20473	11.3418	6.50171	9.54503	11.1851	4.94238	17.7341
Lysobacter_enzymogenes	19.1054	5.6385	15.5834	3.00747	21.8772	37.2026	17.2101	19.9135	8.28873	53.1462	29.3553	19.4886	13.1098	3.3124	21.008	35.4971	5.64141	14.9624	27.5064	17.3858	4.0172	6.00423	6.95829	16.3805	40.1666	14	23.1911	8.66853	12.0941	13.8106	16.6073	0	7.51619	2.68132	30.7677	1.8903	27.3072	18.2946	30.1999	32.6197	4.17272
Lepisosteus_oculatus	82.1533	80.8185	72.7225	69.1718	104.177	57.9922	86.0507	104.546	53.5	71.1618	104.078	54.5681	70.6238	37.5406	67.5257	51.4346	80.8601	82.2933	59.1803	56.5038	52.2235	136.596	100.895	64.7031	97.2924	56	78.6482	157.96	64.5017	100.127	49.0999	56.6123	163.853	60.7766	43.0748	69.9413	172.946	71.5877	69.3479	82.0435	82.4113
Enterobius_vermicularis	13.3738	31.0118	15.5834	9.02241	27.0861	25.1664	15.4891	29.8702	14.3169	27.0235	26.6867	16.8901	19.8762	3.3124	24.7594	18.8352	24.4461	7.48121	15.0035	15.2125	18.0774	26.2685	16.6999	27.0279	16.0666	6	21.1745	35.6373	17.1333	25.8949	13.7191	15.5227	28.5615	21.4505	12.3071	18.903	32.5086	26.2488	30.1999	25.7004	14.6045
Mycobacterium_gastri	245.505	467.996	248.296	335.834	493.8	412.511	457.79	439.756	214	316.175	461.679	236.462	315.904	189.911	453.173	370.184	240.7	255.43	289.233	229.275	300.285	413.541	422.368	250.622	263.314	170	343.834	652.066	286.226	312.465	243.333	261.147	211.957	297.626	354.855	472.576	395.304	389.755	647.62	630.648	334.861
Corchorus_olitorius	117.498	765.897	81.0337	341.849	302.114	148.81	323.551	356.783	94.1901	190.065	284.213	66.2612	103.61	54.1026	311.369	168.068	82.7406	112.218	177.541	116.267	177.761	430.803	242.844	221.956	405.236	36	118.981	864.926	160.246	231.328	146.578	173.489	121.762	112.615	145.634	438.551	466.823	162.265	470.894	228.338	125.182
Paramecium_sexaurelia	7.64217	5.6385	7.27225	7.01743	11.4595	3.28258	4.30254	16.5946	3.7676	9.00782	9.34033	5.19696	11.4182	1.10413	9.00343	3.62215	13.1633	7.48121	6.66821	8.69289	5.02149	12.0085	11.8291	8.19026	13.3889	6	11.0914	20.2266	9.07055	1.72633	3.61029	3.65241	15.0324	2.68132	1.02559	5.67091	9.1024	8.74961	12.3037	12.8502	5.2159
Primula_veris	13.3738	26.313	11.4278	17.0423	35.4203	10.9419	21.5127	28.2108	9.04225	29.7258	37.3613	5.19696	18.6075	14.3537	18.0069	21.0085	22.5656	14.9624	14.1699	23.9054	22.0946	36.0254	27.8332	26.2088	31.2407	7	14.1163	44.3058	22.1724	22.4423	14.4411	18.262	36.0777	11.619	14.3583	25.5191	57.2151	31.8168	25.7258	19.7695	20.8636
Schistosoma_mattheei	17.1949	14.0963	9.35004	19.0473	23.9608	9.84774	13.7681	29.8702	9.79577	19.8172	21.3493	7.79544	11.4182	6.62481	12.0046	12.3153	18.8047	8.54995	6.66821	9.7795	8.03439	36.0254	21.5707	14.7425	16.0666	6	19.1579	32.7478	11.0862	20.7159	14.4411	17.3489	30.0648	6.25641	10.2559	16.0676	42.9113	11.9313	13.4222	18.781	10.4318
Bactrocera_dorsalis	71.6453	131.565	199.468	78.1942	94.8013	75.4993	74.8641	96.2485	42.9507	36.9321	117.421	37.6779	49.0561	206.473	94.536	60.1277	71.4578	184.893	216.717	199.936	77.331	96.0676	78.6287	52.4177	247.248	177	303.501	223.455	49.3841	98.4007	34.6587	68.4826	55.6198	65.2454	63.5867	125.705	120.932	63.6335	116.325	125.536	63.634
Glycine_soja	3.82109	12.2168	6.23336	6.01494	12.5013	1.09419	7.74457	1.65946	6.02817	12.611	10.6747	3.89772	6.34346	6.62481	22.5086	4.34658	5.64141	7.48121	4.16763	3.25983	5.02149	13.5095	9.04578	9.00929	8.03332	3	6.04986	14.4475	5.03919	3.45266	3.61029	10.9572	9.01943	1.78755	5.12796	4.72576	9.1024	8.74961	13.4222	11.8617	7.30226
Salinispora_pacifica	3.82109	14.0963	7.27225	15.0373	11.4595	10.9419	13.7681	44.8053	3.01408	8.10704	6.67167	1.29924	4.22897	3.3124	12.0046	7.24431	3.76094	8.54995	10.0023	6.51966	7.03009	15.7611	11.1333	3.27611	12.4963	3	19.1579	27.9319	7.05487	3.45266	8.66468	5.47861	1.50324	8.04396	7.17914	10.3967	16.9045	4.77251	6.71108	14.8271	2.08636
Acinetobacter_baumannii	6250.34	3854.86	6646.84	6097.14	6960.09	7049.89	5909.96	7064.3	6925.61	7235.98	7557.66	7210.78	7201.51	5659.79	6003.04	6929.9	5592.51	6173.06	5202.87	5841.62	5513.6	2790.46	7732.05	5955.14	5061.88	4903	6556.04	6139.24	6875.47	5166.9	7811.21	5670.36	5677.73	6073.19	7870.39	5100.04	3525.23	4849.67	8556.63	5840.9	6134.94
Mesorhizobium_sp._LSJC269B00	83.1086	184.191	93.5004	15.0373	153.141	83.1587	126.495	132.756	36.9225	35.1305	194.813	36.3787	61.743	102.685	195.074	87.6561	90.2625	21.3749	25.0058	79.3226	126.542	124.588	73.062	43.4084	133.889	89	133.097	220.566	22.1724	179.538	26.7161	71.2219	43.5939	92.0586	59.4843	27.4094	170.345	48.5205	214.755	142.341	83.4544
Mesorhizobium_sp._LSHC424B00	91.706	269.708	102.85	139.346	251.067	203.52	243.524	185.859	88.1619	117.102	193.478	107.837	153.512	97.1638	213.081	182.557	99.6648	148.555	152.535	86.9289	167.718	225.159	183.699	127.768	103.541	86	187.546	321.699	134.043	174.359	108.309	102.267	73.6587	128.703	153.839	251.411	201.553	176.583	335.554	201.649	130.398
Galendromus_occidentalis	2.86581	11.277	1.03889	8.01992	158.35	2.18839	6.88406	6.63782	2.26056	4.50391	13.3433	119.53	4.65187	6.62481	4.50172	5.79545	0	4.27497	3.3341	6.51966	3.0129	8.25581	6.95829	4.91416	93.722	5	3.02493	34.6741	4.03135	5.17898	5.0544	129.66	9.01943	3.57509	3.07677	3.78061	6.50171	3.97709	4.47406	29.6543	111.62
Vibrio_galatheae	1.91054	4.69875	14.5445	10.0249	9.37596	3.28258	6.02355	14.9351	6.78169	9.9086	8.006	7.79544	6.34346	5.52067	11.2543	10.8665	11.2828	3.20623	8.33526	4.34644	4.0172	9.75687	6.26246	2.45708	5.35554	4	10.0831	11.558	1.00784	3.45266	5.77646	7.30481	4.50971	14.3004	9.23032	11.3418	3.90103	5.56793	6.71108	0.988476	4.17272
Struthio_camelus	134.693	143.782	198.429	132.329	202.104	178.353	107.563	237.302	217.014	281.044	168.126	180.594	257.544	183.286	156.81	199.943	220.015	162.449	164.205	183.637	75.3224	192.135	156.561	117.121	146.385	125	188.554	183.002	173.348	262.402	82.3145	93.1364	276.596	79.5458	256.398	124.76	282.174	199.65	149.881	205.603	84.4976
Vibrio_anguillarum	4.77636	5.6385	11.4278	1.00249	15.6266	21.8839	0.860507	29.8702	1.50704	14.4125	29.3553	3.89772	7.18925	17.6662	36.0137	15.213	31.968	21.3749	13.3364	5.43305	2.0086	3.75264	5.56663	11.4664	24.0999	11	11.0914	15.4107	12.0941	12.0843	2.16617	4.56551	18.0389	4.46886	12.3071	2.83546	45.512	27.8397	17.8962	37.5621	1.04318
Citrullus_lanatus	41.0767	93.0353	50.9058	69.1718	88.5507	78.7819	70.5616	86.2917	56.5141	131.514	88.066	50.6703	54.1308	22.0827	51.7697	85.4828	47.0117	58.7809	53.3457	41.2912	52.2235	119.334	79.3245	115.483	108.896	44	63.5236	110.765	47.3684	62.1478	75.816	70.3088	66.1425	52.7326	65.6379	72.7767	88.4233	49.316	82.77	85.9974	64.6772
Mycobacterium_tuberculosis	2798.95	1527.09	2189.99	2056.11	2027.29	2348.14	1620.34	1802.17	2163.36	3781.48	1962.8	4286.19	3358.23	2455.59	1841.95	2348.6	2472.82	2328.79	1532.02	2347.08	2520.79	1293.91	1659.55	2801.89	1866.41	2722	1813.95	1241.53	2658.68	2059.51	2752.48	1694.72	2519.43	2360.45	3582.39	1045.34	1070.18	2800.67	1907.07	1719.95	2723.74
Schistosoma_japonicum	31.524	27.2528	22.8557	26.0647	34.3785	19.6955	27.5362	24.8918	15.8239	25.2219	44.033	18.1894	19.8762	12.1455	23.2589	28.2528	33.8484	19.2374	12.5029	15.2125	16.0688	51.0359	35.4873	30.304	13.3889	18	33.2742	158.923	23.1803	37.9792	21.6617	18.262	55.6198	31.282	22.563	32.1352	61.1161	27.8397	31.3184	32.6197	39.6409
3300006641_____Ga0075471_10006702	21.016	48.867	23.8945	0	41.6709	7.65935	44.7464	54.7621	7.53521	12.611	41.3643	5.19696	5.92056	8.83308	12.7549	18.8352	15.0437	8.54995	9.16878	2.17322	23.0989	27.7695	25.7457	9.82832	11.6037	17	35.2909	15.4107	5.03919	32.8002	20.2176	11.8703	12.0259	22.3443	7.17914	17.0127	45.512	19.8855	43.622	70.1818	7.30226
Porphyra_umbilicalis	4.77636	0.93975	2.07779	3.00747	8.33418	4.37677	1.72101	1.65946	3.01408	17.1149	6.67167	11.6932	15.2243	17.6662	5.252	10.8665	5.64141	10.6874	6.66821	13.0393	0	3.00211	4.17497	2.45708	3.57036	8	6.04986	13.4844	11.0862	10.358	2.16617	3.65241	13.5291	0	12.3071	0.945152	13.0034	89.8823	8.94811	0	0
Chenopodium_quinoa	46.8083	139.083	29.089	109.271	96.8849	31.7316	98.9583	92.9295	36.169	48.6422	142.774	46.7726	49.0561	18.7703	69.7766	26.0795	54.5336	34.1998	36.6751	46.7243	38.1634	149.355	119.683	72.8933	78.548	41	62.5153	221.529	46.3606	44.8845	42.6014	112.312	82.6781	50.9451	64.6123	141.773	198.952	68.406	170.014	131.467	68.8499
Bradyrhizobium_viridifuturi	9.55271	4.69875	2.07779	3.00747	16.6684	16.4129	3.44203	16.5946	4.52112	19.8172	16.012	7.79544	5.49766	4.41654	8.25315	15.9375	3.76094	13.8937	13.3364	6.51966	0	3.75264	2.78332	4.91416	22.3148	9	12.0997	2.88951	11.0862	13.8106	9.38674	3.65241	3.00648	0.893773	13.3327	0	22.1058	7.15877	11.1851	14.8271	3.12954
Cucumis_sativus	23.8818	40.4093	20.7779	32.0797	22.919	19.6955	29.2572	38.1675	14.3169	24.3211	34.6927	16.8901	24.9509	12.1455	18.7572	31.875	24.4461	37.406	10.0023	17.3858	26.1118	44.2812	31.3123	28.6659	19.637	15	31.2576	53.9375	29.2273	41.4319	20.9397	24.6537	37.5809	21.4505	19.4862	20.7934	57.2151	20.6809	22.3703	34.5967	19.8204
Citrus_maxima	9.55271	3.759	6.23336	7.01743	6.25064	7.65935	9.46558	1.65946	6.78169	9.9086	4.003	0	7.18925	6.62481	14.2554	9.4176	11.2828	4.27497	1.66705	3.25983	10.043	12.0085	8.34995	14.7425	14.2814	1	3.02493	26.9688	6.04703	5.17898	4.33234	6.39171	4.50971	8.04396	3.07677	3.78061	16.9045	10.3404	0	8.89628	10.4318
Pelomonas_sp._KK5	4.77636	6.57825	6.23336	1.00249	11.4595	6.56516	3.44203	11.6162	4.52112	9.00782	24.018	5.19696	7.61215	6.62481	4.50172	17.3863	9.40234	5.34372	11.6694	6.51966	1.0043	7.50528	4.17497	8.19026	15.174	7	12.0997	4.81585	8.06271	3.45266	7.22057	6.39171	7.51619	1.78755	8.20473	3.78061	28.6075	8.74961	11.1851	14.8271	5.2159
Lerema_accius	30.5687	31.9515	16.6223	37.0921	42.7127	25.1664	36.1413	49.7837	15.0704	23.4203	52.039	14.2916	25.3738	14.3537	28.5109	30.4261	35.7289	24.5811	23.3387	24.992	32.1376	48.7843	29.2248	28.6659	17.8518	16	38.3158	78.9799	26.2038	34.5266	20.2176	17.3489	51.1101	21.4505	17.4351	34.9706	74.1195	25.4534	32.4369	32.6197	25.0363
Acinetobacter_guillouiae	1.91054	3.759	8.31115	1.00249	12.5013	12.0361	2.58152	9.95674	0.753521	17.1149	10.6747	7.79544	4.22897	1.10413	2.25086	13.7642	0	36.3373	5.00115	0	3.0129	5.2537	5.56663	12.2854	11.6037	5	6.04986	5.77902	5.03919	10.358	3.61029	3.65241	3.00648	0.893773	2.05118	6.61607	11.7031	4.77251	10.0666	10.8732	7.30226
Pseudomonas_sp._2(2015)	700.214	403.153	610.869	563.399	395.874	411.417	395.833	386.653	767.838	580.104	286.882	774.347	672.829	692.292	446.42	502.755	763.47	647.659	411.762	596.549	636.725	217.653	283.202	442.274	352.573	601	440.632	204.192	775.028	554.151	820.979	464.769	656.915	583.634	626.636	433.825	266.57	587.019	167.777	243.165	739.615
Ixodes_scapularis	63.0479	95.8545	65.4503	80.1992	115.637	67.84	66.2591	139.394	37.676	118.903	106.747	35.0795	75.6986	55.2067	53.2703	79.6874	58.2945	69.4683	58.3468	53.2439	50.2149	135.846	135.687	100.74	89.2591	49	64.5319	354.446	59.4625	96.6744	41.8793	63.004	111.24	62.5641	47.1772	96.4055	163.843	60.4518	89.4811	88.9628	58.4181
Angiostrongylus_costaricensis	14.3291	12.2168	11.4278	6.01494	11.4595	7.65935	12.9076	8.29728	4.52112	6.30548	5.33733	5.19696	6.76635	5.52067	6.00229	6.51988	7.52187	4.27497	8.33526	7.60627	10.043	18.0127	11.1333	14.7425	7.14072	3	8.06648	24.0792	5.03919	5.17898	4.33234	10.0441	19.5421	9.8315	8.20473	17.9579	28.6075	2.38626	2.23703	3.9539	13.5613
Mesorhizobium_sp._LSJC268A00	44.8978	20.6745	19.739	27.0672	25.0026	14.2245	22.3732	38.1675	22.6056	18.9164	12.009	27.284	33.4089	19.8744	38.2646	20.2841	33.8484	18.1686	14.1699	17.3858	33.1419	17.2622	9.7416	23.7518	17.8518	22	20.1662	8.66853	30.2352	32.8002	22.3838	28.3062	36.0777	38.4322	31.7933	28.3546	14.3038	37.3847	21.2518	13.8387	41.7272
Bombus_impatiens	6.6869	27.2528	10.3889	20.0498	13.543	12.0361	20.6522	28.2108	8.28873	14.4125	10.6747	10.3939	8.03504	4.41654	6.75257	21.7329	26.3266	10.6874	11.6694	8.69289	5.02149	24.7674	41.7497	21.2947	11.6037	5	12.0997	39.49	11.0862	13.8106	10.1088	18.262	31.568	12.5128	12.3071	14.1773	26.0069	24.658	14.5407	15.8156	13.5613
Oryza_meridionalis	15.2843	11.277	11.4278	3.00747	5.20887	9.84774	9.46558	8.29728	10.5493	13.5117	16.012	11.6932	8.03504	5.52067	12.0046	9.4176	7.52187	7.48121	3.3341	8.69289	6.02579	18.0127	9.04578	5.73318	7.14072	9	7.05817	7.70536	17.1333	22.4423	5.77646	10.0441	6.01295	2.68132	3.07677	10.3967	16.9045	18.2946	10.0666	9.88476	3.12954
Crocodylus_porosus	254.102	758.379	809.298	510.267	507.343	468.315	512.862	716.885	295.38	347.702	679.176	220.871	312.098	576.358	778.047	419.445	379.855	636.971	751.007	590.03	422.81	616.934	621.375	299.764	457.899	384	1111.16	981.47	436.394	505.814	197.122	383.503	297.641	386.11	333.317	657.826	889.434	736.558	834.411	1110.06	422.488
Rattus_norvegicus	8548.72	5833.97	7795.86	7461.53	6550.67	6430.57	6419.38	6236.24	7408.62	7680.07	6304.72	8619.16	8575.93	8146.3	6656.54	6316.31	8606.9	7520.75	7064.13	7738.84	7425.79	5657.48	5371.8	7786.48	7852.12	8510	7275.97	4878.46	8258.23	8322.63	7488.45	6748.73	8811.98	7036.67	7762.7	6369.38	6406.79	7613.75	5287.22	5297.24	7913.57
3300012953_____Ga0163179_10000535	0.955271	1.8795	19.739	8.01992	9.37596	5.47097	0	3.31891	1.50704	67.5587	5.33733	18.1894	0.845794	2.20827	0	5.07102	0	4.27497	0.833526	3.25983	1.0043	51.7865	55.6663	1.63805	8.03332	0	0	0.96317	0	1.72633	5.77646	11.8703	0	0	0	2.83546	81.9216	7.15877	3.35554	2.96543	13.5613
Cavia_porcellus	2210.5	2300.51	2031.04	2569.38	2409.62	2156.65	2110.82	2061.04	2087.25	2064.59	2316.4	2125.56	1856.52	2160.79	2100.05	1969	2141.85	2007.1	2027.13	1867.88	1912.18	1982.15	2255.18	2021.36	2141.32	2181	1930.91	2440.67	2269.65	2282.21	1785.65	1546.79	2220.28	2048.53	2122.97	2249.46	2442.04	2049.79	2367.89	2753.89	1748.37
Barbarea_vulgaris	6.6869	13.1565	9.35004	8.01992	13.543	12.0361	13.7681	11.6162	6.02817	13.5117	21.3493	6.4962	12.6869	11.0413	6.75257	8.69317	9.40234	5.34372	9.16878	6.51966	6.02579	10.5074	10.4374	9.82832	8.03332	9	11.0914	23.1161	8.06271	20.7159	6.49851	5.47861	24.0518	4.46886	6.15355	14.1773	31.2082	7.15877	14.5407	10.8732	9.38862
Amphinemura_sulcicollis	19.1054	12.2168	11.4278	19.0473	28.1279	9.84774	16.3496	24.8918	8.28873	29.7258	25.3523	3.89772	13.9556	6.62481	16.5063	10.142	18.8047	10.6874	13.3364	13.0393	10.043	25.518	56.3621	21.2947	9.8185	12	23.1911	24.0792	12.0941	17.2633	15.1632	13.6965	19.5421	16.9817	19.4862	7.56122	42.9113	19.0901	11.1851	18.781	14.6045
Methylobacterium_sp._ap11	22.9265	3.759	21.8168	2.00498	21.8772	42.6735	15.4891	51.4431	36.9225	35.1305	45.3673	22.0871	9.30374	6.62481	13.5051	42.017	16.9242	18.1686	22.5052	16.2992	2.0086	1.50106	7.65412	7.37124	65.1591	12	18.1496	0	13.1019	37.9792	18.0514	0.913102	12.0259	1.78755	28.7166	0.945152	39.0103	10.3404	21.2518	23.7234	6.25908
Leptinotarsa_decemlineata	54.4505	131.565	41.5557	80.1992	171.893	40.4851	90.3533	134.416	39.9366	102.689	180.135	55.8673	54.9766	25.3951	85.5326	51.4346	45.1312	44.8872	52.5121	61.9368	64.2751	189.133	117.595	117.94	97.2924	34	69.5734	459.432	51.3998	105.306	53.4322	90.3971	72.1554	66.1392	55.3819	86.0089	189.85	68.406	147.644	106.755	66.7635
Acinetobacter_idrijaensis	3691.17	3810.69	4643.85	3594.93	2948.22	3616.31	2473.96	4097.2	4684.64	3198.68	3245.1	3444.28	3821.3	3928.51	3458.07	4445.11	4676.73	3936.18	3129.06	4181.28	3680.76	2586.32	3831.23	2788.78	3204.4	3539	4299.44	3492.45	3825.76	4191.52	4447.15	3775.68	4339.85	3045.98	3376.25	3045.28	4406.86	3316.9	2318.68	1728.84	3051.3
Austrofundulus_limnaeus	166.217	149.42	112.2	176.438	231.274	136.774	184.149	190.837	121.317	229.699	205.487	128.625	148.437	78.3935	182.319	144.162	233.178	112.218	87.5202	98.8816	152.653	255.93	191.353	163.805	123.178	140	137.13	183.965	185.442	220.97	138.635	157.967	220.976	151.048	131.276	194.701	295.178	191.696	191.266	167.052	180.47
Hibiscus_syriacus	225.444	465.176	217.129	266.662	476.09	478.162	424.23	464.648	232.084	367.519	540.405	270.242	282.918	217.514	364.639	344.829	267.027	181.686	226.719	197.763	323.384	510.359	478.73	393.133	428.443	222	334.759	15512.8	227.772	343.539	272.216	325.977	405.874	295.839	282.038	396.019	565.649	245.784	535.768	428.999	286.875
3300007344_____Ga0070745_1001122	2.86581	3.759	12.4667	3.00747	7.29241	4.37677	0	1.65946	5.27465	99.086	2.66867	6.4962	0	0	2.25086	3.62215	1.88047	2.13749	0	1.08661	1.0043	38.2769	22.9624	0	6.24813	1	0	0.96317	1.00784	1.72633	1.44411	3.65241	0	0	0	0.945152	46.8123	7.15877	5.59257	1.97695	5.2159
Caenorhabditis_remanei	75.4664	56.385	98.6949	50.1245	81.2583	54.7097	42.1649	96.2485	48.9788	32.4282	77.3913	46.7726	66.3948	55.2067	115.544	59.4033	82.7406	48.0935	75.0173	71.7163	64.2751	36.0254	43.8372	48.3226	38.3814	58	78.6482	53.9375	90.7055	84.5901	35.3808	43.8289	67.6457	69.7143	62.5611	77.5025	133.935	96.2457	102.903	65.2394	78.2385
Trichomonas_vaginalis	5.73163	28.1925	16.6223	17.0423	12.5013	21.8839	20.6522	19.9135	15.0704	8.10704	38.6957	7.79544	10.5724	13.2496	13.5051	18.8352	22.5656	13.8937	5.83468	4.34644	8.03439	13.5095	20.8749	7.37124	13.3889	17	19.1579	37.5636	11.0862	20.7159	11.5529	16.4358	15.0324	10.7253	14.3583	8.50637	28.6075	7.15877	25.7258	17.7926	8.34544
Dendroctonus_ponderosae	15.2843	17.8553	10.3889	11.0274	17.7101	17.5071	9.46558	29.8702	9.04225	7.20626	30.6897	3.89772	11.8411	11.0413	11.2543	5.79545	9.40234	13.8937	11.6694	11.9527	13.0559	18.7632	20.179	18.8376	12.4963	15	18.1496	27.9319	8.06271	12.0843	7.22057	14.6096	22.5486	8.04396	5.12796	6.61607	15.6041	12.7267	14.5407	10.8732	9.38862
Danio_rerio	109.856	172.914	113.239	154.383	205.229	113.796	146.286	187.519	79.1197	137.82	196.147	61.0643	119.257	83.9142	100.538	141.264	137.274	119.699	85.8532	115.181	107.46	275.444	224.057	137.596	129.426	86	129.064	291.84	106.831	164.001	78.7042	140.618	192.414	105.465	91.2777	139.883	348.492	138.403	170.014	168.041	131.441
Sclerotinia_borealis	0.955271	11.277	4.15557	6.01494	19.7937	3.28258	14.6286	16.5946	0	14.4125	16.012	1.29924	2.53738	2.20827	4.50172	6.51988	7.52187	3.20623	10.0023	6.51966	7.03009	12.759	18.0916	9.82832	8.03332	5	8.06648	9.6317	9.07055	3.45266	6.49851	7.30481	4.50971	8.04396	8.20473	14.1773	23.4062	3.97709	10.0666	17.7926	4.17272
Mesocestoides_corti	3.82109	6.57825	8.31115	15.0373	9.37596	14.2245	2.58152	9.95674	3.01408	10.8094	13.3433	0	5.07477	5.52067	6.75257	8.69317	7.52187	9.61869	15.837	4.34644	11.0473	11.2579	4.8708	3.27611	32.1333	2	12.0997	5.77902	4.03135	6.90531	3.61029	9.13102	7.51619	7.15018	9.23032	5.67091	9.1024	10.3404	7.8296	11.8617	6.25908
Methylobacterium_radiotolerans	296.134	131.565	319.979	79.1967	700.072	1139.06	256.431	940.912	480.746	1129.58	880.66	650.919	525.661	186.599	335.378	988.848	304.636	369.785	469.275	316.204	110.473	207.896	251.89	744.495	670.336	300	395.258	198.413	290.258	536.888	314.817	143.357	410.384	73.2894	491.258	91.6798	1166.41	811.327	695.716	1175.3	98.059
Maconellicoccus_hirsutus	25.7923	30.072	10.3889	25.0622	45.838	25.1664	39.5833	16.5946	8.28873	33.3289	42.6987	32.481	7.18925	6.62481	19.5074	21.0085	15.0437	20.3061	22.5052	16.2992	17.0731	30.0211	44.533	31.123	21.4222	7	12.0997	164.702	17.1333	6.90531	7.94263	42.0027	28.5615	16.0879	11.2815	40.6416	39.0103	17.4992	59.2812	10.8732	18.7772
Bacillus_cereus	9.55271	5.6385	6.23336	3.00747	12.5013	6.56516	8.60507	14.9351	6.02817	14.4125	14.6777	5.19696	11.4182	6.62481	12.0046	14.4886	16.9242	9.61869	5.83468	6.51966	4.0172	16.5116	11.1333	9.82832	20.5296	5	10.0831	15.4107	12.0941	10.358	7.22057	3.65241	18.0389	7.15018	8.20473	6.61607	19.5051	15.113	11.1851	15.8156	8.34544
Heterocephalus_glaber	22931.3	16648.6	20932.7	19222.7	15040.1	16847.3	15076.9	15401.4	22667.4	18671.4	14704.4	21550.5	25096	24974.4	17741.3	17936.9	24464.9	20773.2	16433	22871	19204.2	12897.1	14316.7	16178.2	16651.3	22694	16692.6	15342.3	22951.5	21587.7	20458	17470.4	22611.7	17445.6	19429.8	15914.5	15237.4	21453.2	13813.6	13504.6	18872.2
Hermetia_illucens	27.7029	45.108	30.1279	30.0747	56.2557	36.1084	28.3967	49.7837	19.5915	35.1305	56.042	11.6932	31.2944	23.1868	32.2623	31.1505	54.5336	33.1311	36.6751	19.559	24.1032	54.038	34.0956	36.0372	41.0592	22	42.349	168.555	38.2979	65.6005	28.1602	28.3062	48.1036	31.282	28.7166	45.3673	61.1161	30.2259	41.385	45.4699	28.1659
Branchiostoma_belcheri	37.2556	39.4695	28.0501	35.0871	44.7962	40.4851	43.0254	36.508	20.3451	23.4203	57.3763	15.5909	24.9509	29.8116	30.0114	30.4261	56.4141	32.0623	26.6728	42.3778	20.086	43.5306	37.5748	23.7518	33.0259	28	39.3241	69.3482	19.1489	48.3372	21.6617	30.1324	60.1295	16.0879	32.8189	34.9706	74.1195	33.4076	45.8591	44.4814	34.425
Phialocephala_scopiformis	3.82109	7.518	5.19447	1.00249	13.543	3.28258	3.44203	9.95674	0	8.10704	12.009	2.59848	4.65187	17.6662	58.5223	2.89772	3.76094	0	0.833526	2.17322	5.02149	15.7611	9.7416	12.2854	0.892591	2	3.02493	13.4844	5.03919	0	3.61029	7.30481	6.01295	2.68132	3.07677	3.78061	6.50171	17.4992	5.59257	0	4.17272
Camponotus_floridanus	36.3003	45.108	21.8168	43.1071	29.1696	14.2245	26.6757	38.1675	7.53521	36.9321	50.7047	10.3939	16.9159	15.4579	24.0092	24.6306	20.6852	16.0312	11.6694	10.8661	22.0946	51.7865	39.6622	38.4942	27.6703	16	20.1662	62.606	25.196	29.3476	12.275	29.2193	27.0583	12.5128	17.4351	27.4094	49.413	16.7038	32.4369	34.5967	21.9068
Hypothenemus_hampei	18.1502	41.349	21.8168	23.0573	23.9608	19.6955	27.5362	39.8269	17.331	15.3133	48.036	15.5909	12.264	14.3537	24.7594	24.6306	13.1633	22.4436	16.6705	17.3858	24.1032	30.7717	29.2248	31.123	31.2407	18	32.2659	74.1641	15.1176	31.0739	15.8853	27.393	37.5809	7.15018	10.2559	27.4094	39.0103	23.8626	51.4516	48.4353	15.6477
Daphnia_pulex	12.4185	31.9515	17.6612	22.0548	19.7937	8.75355	13.7681	31.5297	12.0563	25.2219	40.03	3.89772	9.72663	8.83308	30.0114	14.4886	16.9242	12.8249	30.0069	11.9527	18.0774	50.2854	21.5707	34.3991	34.811	9	17.1413	71.2746	20.1568	20.7159	10.8309	25.5668	25.555	14.3004	13.3327	30.2449	44.2117	19.0901	39.148	32.6197	13.5613
Zoysia_matrella	2.86581	4.69875	6.23336	12.0299	8.33418	1.09419	2.58152	4.97837	4.52112	9.9086	5.33733	5.19696	6.34346	5.52067	4.50172	2.89772	3.76094	3.20623	5.00115	5.43305	3.0129	18.0127	11.8291	4.91416	7.14072	2	7.05817	10.5949	9.07055	6.90531	1.44411	1.8262	6.01295	4.46886	3.07677	6.61607	29.9079	8.74961	8.94811	1.97695	4.17272
Methylobacterium_sp._CCH5-D2	9.55271	1.8795	15.5834	5.01245	26.0443	37.2026	12.9076	44.8053	26.3732	27.0235	24.018	22.0871	8.03504	4.41654	11.2543	23.1818	11.2828	3.20623	19.1711	11.9527	4.0172	1.50106	4.8708	9.00929	15.174	13	5.04155	0.96317	16.1254	15.537	15.1632	0.913102	12.0259	8.93773	14.3583	0.945152	31.2082	8.74961	27.9628	4.94238	3.12954
Astyanax_mexicanus	115.588	187.95	118.434	137.341	194.812	74.4051	123.053	247.259	82.8873	204.478	196.147	81.8521	116.297	76.1853	131.3	108.665	133.513	102.599	85.8532	72.8029	115.494	237.917	384.793	161.348	144.6	76	154.272	227.308	129.003	212.338	103.976	147.922	201.434	98.315	96.4056	128.541	341.99	167.833	143.17	163.099	131.441
Thalassomonas_actiniarum	21.9712	3.759	18.7001	20.0498	14.5848	7.65935	24.9547	21.5729	12.0563	1.80156	20.015	7.79544	14.8014	15.4579	28.5109	17.3863	26.3266	20.3061	16.6705	17.3858	23.0989	17.2622	13.2207	22.1137	22.3148	21	25.2078	10.5949	18.1411	13.8106	4.33234	16.4358	18.0389	17.8755	10.2559	17.9579	14.3038	19.8855	21.2518	12.8502	18.7772
Oryza_sativa	10.508	6.57825	14.5445	6.01494	17.7101	13.1303	6.88406	11.6162	3.01408	18.9164	14.6777	19.4886	36.792	24.291	17.2566	7.96874	16.9242	17.0999	10.0023	13.0393	4.0172	10.5074	4.17497	4.91416	15.174	23	8.06648	7.70536	24.1881	20.7159	2.88823	6.39171	36.0777	2.68132	12.3071	6.61607	13.0034	9.54503	14.5407	3.9539	3.12954
Methylobacterium_sp._4-46	2.86581	0.93975	5.19447	1.00249	10.4177	17.5071	7.74457	9.95674	9.79577	9.9086	12.009	9.09468	6.34346	3.3124	6.00229	15.213	3.76094	8.54995	8.33526	4.34644	0	2.25159	2.08749	2.45708	18.7444	10	4.03324	0	7.05487	13.8106	3.61029	1.8262	1.50324	0.893773	10.2559	0	5.20137	8.74961	15.6592	7.90781	0
Drosophila_obscura	23.8818	58.2645	38.4391	43.1071	59.3811	30.6374	37.0018	29.8702	23.3591	64.8563	34.6927	28.5833	37.2149	25.3951	30.7617	20.2841	26.3266	38.4748	42.5098	42.3778	16.0688	73.5518	691.654	44.2274	58.0184	25	29.241	73.2009	41.3214	25.8949	26.7161	23.7406	40.5874	23.2381	22.563	27.4094	91.024	36.5893	33.5554	43.4929	26.0795
Knoxdaviesia_proteae	3.82109	4.69875	11.4278	1.00249	8.33418	2.18839	2.58152	8.29728	3.7676	25.2219	4.003	6.4962	12.6869	6.62481	9.75372	7.96874	7.52187	7.48121	14.1699	6.51966	1.0043	6.75476	0.695829	2.45708	21.4222	3	14.1163	0.96317	16.1254	8.63164	1.44411	5.47861	0	0.893773	15.3839	1.8903	9.1024	9.54503	19.0147	7.90781	1.04318
Aspergillus_nidulans	6.6869	15.036	10.3889	14.0349	9.37596	19.6955	13.7681	4.97837	11.3028	10.8094	8.006	15.5909	19.4533	15.4579	12.0046	15.213	5.64141	17.0999	13.3364	5.43305	15.0645	14.26	16.6999	27.8469	11.6037	12	9.07479	12.5212	10.0784	17.2633	15.8853	12.7834	7.51619	9.8315	24.6142	16.0676	13.0034	12.7267	17.8962	3.9539	19.8204
Cordyceps_confragosa	1.91054	7.518	5.19447	9.02241	7.29241	9.84774	6.88406	16.5946	3.01408	18.9164	16.012	12.9924	4.65187	12.1455	5.252	0.724431	5.64141	9.61869	4.16763	6.51966	4.0172	16.5116	11.8291	14.7425	8.03332	2	5.04155	8.66853	2.01568	6.90531	2.16617	5.47861	3.00648	4.46886	6.15355	14.1773	9.1024	2.38626	13.4222	9.88476	6.25908
Marchantia_polymorpha	6.6869	6.57825	17.6612	16.0398	25.0026	3.28258	6.88406	8.29728	6.02817	47.7415	18.6807	10.3939	6.34346	2.20827	7.50286	8.69317	7.52187	4.27497	9.16878	4.34644	4.0172	387.273	311.036	24.5708	6.24813	3	10.0831	28.8951	7.05487	10.358	6.49851	24.6537	16.5356	4.46886	5.12796	12.287	137.836	44.5435	20.1333	16.8041	17.7341
Neurospora_pannonica	36.3003	71.421	57.1391	53.132	79.1748	61.2748	51.6304	71.3566	30.8943	42.3368	66.7167	44.1741	50.3248	64.0398	77.2795	57.9545	60.175	59.8496	75.8508	46.7243	58.2493	56.2896	45.9247	53.2367	61.5888	52	56.4654	115.58	50.3919	70.7794	27.4382	27.393	42.0907	57.2015	71.7914	76.5573	87.123	38.1801	110.733	56.3431	32.3386
3300009680_____Ga0123335_1015929	21.9712	43.2285	33.2446	21.0523	52.0887	90.818	37.8623	54.7621	33.9084	62.154	30.6897	67.5605	38.4836	26.4992	42.016	70.2698	3.76094	40.6123	48.3445	24.992	21.0903	45.7822	75.1495	46.6845	49.0925	24	58.482	59.7165	31.243	27.6212	48.3778	29.2193	21.0453	26.8132	32.8189	41.5867	32.5086	28.6351	54.8072	39.539	30.2522
Ixodes_ricinus	15.2843	26.313	19.739	17.0423	29.1696	14.2245	22.3732	41.4864	8.28873	37.8329	41.3643	11.6932	17.3388	5.52067	15.0057	23.9062	15.0437	32.0623	19.1711	15.2125	17.0731	52.537	32.704	19.6566	17.8518	19	24.1995	44.3058	10.0784	29.3476	12.275	26.4799	36.0777	21.4505	11.2815	32.1352	45.512	22.2717	24.6073	20.758	20.8636
Sporothrix_brasiliensis	12.4185	2.81925	7.27225	6.01494	8.33418	4.37677	3.44203	8.29728	18.838	11.7102	4.003	11.6932	8.45794	14.3537	12.0046	2.89772	13.1633	5.34372	5.00115	9.7795	0	3.75264	2.78332	0	4.46295	10	8.06648	3.85268	13.1019	6.90531	5.0544	4.56551	13.5291	2.68132	10.2559	2.83546	10.4027	8.74961	6.71108	2.96543	1.04318
Mentha_longifolia	434.648	914.377	269.073	274.682	770.912	620.408	597.192	794.88	382.789	329.686	737.886	252.052	415.708	414.05	754.788	525.212	340.365	224.436	195.045	555.258	276.182	644.704	1432.02	507.796	621.243	390	406.349	1331.1	246.92	569.688	314.817	470.247	321.693	465.656	719.965	799.599	795.81	676.901	996.596	997.372	466.302
Xylophilus_ampelinus	14.3291	1.8795	16.6223	2.00498	18.7519	38.2968	14.6286	46.4648	3.01408	26.1227	24.018	12.9924	12.264	2.20827	17.2566	31.1505	13.1633	21.3749	18.3376	16.2992	3.0129	3.75264	4.8708	11.4664	39.274	20	14.1163	0.96317	1.00784	25.8949	14.4411	0.913102	18.0389	8.04396	18.4606	0.945152	35.1093	16.7038	27.9628	25.7004	2.08636
3300009664_____Ga0116146_1001442	20.0607	21.6143	44.6724	26.0647	45.838	66.7458	56.7935	38.1675	26.3732	57.6501	49.3703	24.6856	19.0304	19.8744	31.512	53.6079	24.4461	34.1998	50.8451	40.2046	31.1333	34.5243	92.5452	31.942	26.7777	9	66.5485	92.4643	24.1881	17.2633	33.9367	33.7848	15.0324	25.0256	8.20473	36.8609	22.1058	23.8626	43.622	37.5621	37.5545
Drosophila_bipectinata	7.64217	18.795	12.4667	16.0398	30.2114	9.84774	18.0707	24.8918	7.53521	14.4125	34.6927	10.3939	11.4182	7.72894	15.756	12.3153	15.0437	11.7562	11.6694	18.4724	18.0774	45.0317	35.4873	21.2947	22.3148	14	21.1745	41.4163	13.1019	17.2633	7.94263	19.1751	24.0518	20.5568	12.3071	33.0803	40.3106	11.9313	27.9628	22.7349	19.8204
Rhizoclosmatium_globosum	3.82109	11.277	2.07779	3.00747	14.5848	5.47097	11.1866	8.29728	5.27465	5.40469	10.6747	7.79544	3.38318	6.62481	7.50286	5.07102	3.76094	4.27497	5.00115	2.17322	5.02149	9.75687	8.34995	9.82832	8.92591	3	8.06648	23.1161	5.03919	8.63164	6.49851	4.56551	4.50971	3.57509	3.07677	9.45152	6.50171	4.77251	10.0666	10.8732	0
Seriola_quinqueradiata	43.9425	52.626	39.478	63.1569	44.7962	36.1084	33.5598	51.4431	41.4436	64.8563	65.3823	32.481	52.4392	56.3109	48.0183	42.017	62.0555	38.4748	44.1769	40.2046	37.1591	198.89	68.1912	40.1323	49.9851	52	34.2826	47.1953	62.486	46.6109	36.1029	51.1337	75.1619	30.3883	34.8701	53.8737	143.038	64.4289	35.7924	44.4814	49.0295
Crassostrea_gigas	43.9425	34.7708	36.3613	41.1021	72.9241	25.1664	57.654	48.1242	18.0845	38.7336	66.7167	16.8901	38.0607	32.0199	39.0149	30.4261	71.4578	42.7497	22.5052	45.6376	43.1848	67.5476	55.6663	53.2367	50.8777	31	57.4737	106.912	46.3606	62.1478	23.1058	42.9158	84.1813	32.1758	28.7166	35.9158	84.5223	55.6793	54.8072	49.4238	42.7704
Drosophila_americana	30.5687	40.4093	30.1279	36.0896	38.5456	19.6955	19.7917	33.1891	23.3591	29.7258	26.6867	2.59848	19.8762	13.2496	33.7629	19.5596	24.4461	35.2685	22.5052	31.5117	37.1591	36.7759	47.3164	35.2181	24.9925	31	31.2576	24.0792	30.2352	32.8002	25.272	26.4799	37.5809	45.5824	15.3839	27.4094	44.2117	38.9755	16.7777	33.6082	38.5977
3300018407_____Ga0187900_1001551	14.3291	8.45775	166.223	2.00498	5.20887	21.8839	0	13.2756	6.78169	958.432	2.66867	1.29924	1.26869	1.10413	1.50057	0	13.1633	8.54995	5.00115	3.25983	10.043	687.484	496.126	3.27611	1.78518	0	0	0.96317	1.00784	15.537	0	0	0	0.893773	0	0	940.148	77.1556	1.11851	1.97695	0
Brachybacterium_paraconglomeratum	7.64217	0.93975	10.3889	0	12.5013	10.9419	0	4.97837	12.8099	13.5117	2.66867	10.3939	12.264	14.3537	10.504	10.8665	9.40234	13.8937	30.0069	9.7795	0	0.750528	0	1.63805	20.5296	15	22.1828	0	10.0784	10.358	2.16617	0.913102	19.5421	0.893773	13.3327	0.945152	2.60069	4.77251	11.1851	3.9539	1.04318
Equus_przewalskii	2301.25	4102.95	3057.46	1790.45	2303.36	5174.44	3487.64	3766.97	1965.94	3493.23	3646.73	3813.27	5134.82	3166.66	4059.8	3705.46	2689.07	3060.88	2635.61	2962.1	2829.11	3200.25	2168.9	3009.1	5451.05	3221	4049.38	5029.67	3997.09	3266.21	2293.25	1610.71	3062.1	2591.94	6043.81	2412.03	4005.06	3884.03	7018.67	5021.46	2339.85
Parasteatoda_tepidariorum	138.514	268.769	138.173	217.54	210.438	150.999	177.265	204.113	102.479	137.82	262.864	106.538	139.556	92.7473	123.797	161.548	220.015	131.455	106.691	114.094	145.623	292.706	236.582	213.766	214.222	109	152.255	342.888	133.035	219.244	118.417	155.227	258.557	125.128	111.789	165.402	344.591	178.174	167.777	212.522	140.829
Pelodiscus_sinensis	114.633	204.866	148.562	159.396	226.065	133.492	170.38	204.113	84.3943	247.715	240.18	93.5453	120.526	89.4349	136.552	134.02	148.557	157.105	146.701	116.267	133.572	297.96	323.56	163.805	157.096	110	145.197	321.699	124.972	207.159	123.472	178.968	186.402	118.872	100.508	195.647	388.802	181.355	233.769	211.534	170.038
Triticum_dicoccoides	213.981	226.48	264.918	272.677	242.733	130.209	181.567	177.562	213.246	234.203	277.541	200.083	197.493	172.245	230.338	178.934	188.047	187.03	197.546	202.11	276.182	376.765	348.61	287.478	231.181	220	248.044	4565.42	813.326	226.149	218.783	234.667	264.57	224.337	215.374	258.027	323.785	264.079	192.384	161.122	302.522
Dinoponera_quadriceps	54.4505	60.144	19.739	49.122	53.1304	29.5432	38.7228	59.7404	29.3873	44.1383	61.3793	35.0795	24.1051	46.3736	30.0114	24.6306	18.8047	34.1998	33.341	34.7715	28.1204	57.7907	38.9664	37.6752	53.5554	23	33.2742	126.175	34.2665	34.5266	29.6043	48.3944	42.0907	31.282	26.6654	60.4898	63.7168	38.9755	64.8738	32.6197	37.5545
Drosophila_mojavensis	31.524	40.4093	13.5056	31.0772	78.133	22.9781	22.3732	34.8486	21.8521	34.2297	42.6987	16.8901	23.6822	15.4579	21.7583	22.4574	26.3266	23.5124	20.8381	22.8188	18.0774	51.0359	77.237	22.1137	20.5296	16	32.2659	52.0112	15.1176	17.2633	13.7191	27.393	34.5745	20.5568	26.6654	39.6964	53.3141	38.1801	32.4369	16.8041	23.9931
Caenorhabditis_nigoni	7.64217	14.0963	6.23336	11.0274	7.29241	9.84774	8.60507	3.31891	7.53521	12.611	10.6747	0	7.61215	2.20827	11.2543	7.24431	11.2828	3.20623	6.66821	3.25983	17.0731	12.759	11.8291	16.3805	5.35554	8	4.03324	21.1897	5.03919	10.358	3.61029	9.13102	10.5227	8.04396	5.12796	8.50637	13.0034	5.56793	6.71108	5.93086	8.34544
Camelina_sativa	24.8371	49.8068	16.6223	33.0822	39.5874	14.2245	30.1178	41.4864	10.5493	29.7258	44.033	16.8901	24.528	23.1868	21.7583	21.7329	45.1312	29.9248	18.3376	19.559	25.1075	51.7865	39.6622	41.7703	33.0259	25	37.3075	53.9375	30.2352	32.8002	20.2176	32.8717	64.6392	17.8755	12.3071	23.6288	63.7168	38.9755	27.9628	34.5967	26.0795
Anguilla_anguilla	60.1821	79.8788	68.567	86.2141	104.177	48.1445	80.8877	126.119	51.9929	63.0548	177.466	49.3711	41.021	67.3522	77.2795	58.6789	82.7406	55.5747	74.1838	32.5983	56.2407	138.097	123.858	58.9699	59.8036	45	74.615	115.58	52.4076	72.5058	38.269	78.5267	84.1813	54.5201	38.9725	84.1186	143.038	60.4518	90.5996	75.1242	56.3317
Mortierella_elongata	4.77636	8.45775	7.27225	4.00996	8.33418	6.56516	2.58152	9.95674	1.50704	12.611	12.009	11.6932	5.92056	4.41654	9.00343	7.96874	5.64141	4.27497	2.50058	8.69289	5.02149	21.7653	29.2248	11.4664	11.6037	7	6.04986	15.4107	5.03919	3.45266	5.77646	11.8703	12.0259	8.04396	5.12796	5.67091	15.6041	11.1359	8.94811	11.8617	2.08636
Staphylococcus_aureus	3.82109	12.2168	28.0501	19.0473	27.0861	15.3187	5.16304	16.5946	6.02817	9.9086	14.6777	7.79544	5.92056	2.20827	21.008	31.875	16.9242	9.61869	6.66821	1.08661	6.02579	23.2664	27.8332	13.1044	49.9851	3	5.04155	39.49	42.3292	5.17898	7.22057	7.30481	9.01943	18.7692	13.3327	4.72576	15.6041	26.2488	11.1851	12.8502	7.30226
Trachymyrmex_zeteki	18.1502	59.2043	20.7779	50.1245	54.1722	24.0723	49.0489	61.3999	15.8239	30.6266	52.039	12.9924	21.5678	9.93721	15.0057	33.3238	28.207	27.7873	21.6717	15.2125	16.0688	63.0444	34.0956	30.304	33.9184	18	26.2161	67.4219	33.2587	25.8949	16.6073	21.0013	36.0777	25.0256	18.4606	49.1479	54.6144	43.748	40.2665	33.6082	32.3386
Sarcophagidae_sp._BV-2014	59.2268	96.7943	42.5946	56.1394	69.7988	50.3329	76.5852	89.6106	31.6479	46.8407	104.078	25.9848	52.4392	35.3323	40.5154	40.5681	63.9359	39.5435	27.5064	42.3778	61.2622	120.835	166.303	63.065	48.1999	52	62.5153	193.597	39.3057	74.2321	38.269	66.6564	105.227	50.9451	45.126	54.8188	113.13	63.6335	90.5996	105.767	66.7635
Tetranychus_urticae	12.4185	20.6745	7.27225	12.0299	12.5013	8.75355	7.74457	16.5946	8.28873	14.4125	14.6777	9.09468	13.1098	8.83308	3.75143	4.34658	7.52187	10.6874	13.3364	7.60627	10.043	15.7611	13.2207	10.6473	10.7111	3	12.0997	22.1529	14.1097	12.0843	8.66468	13.6965	18.0389	8.04396	6.15355	21.7385	15.6041	7.15877	17.8962	10.8732	10.4318
Globodera_ellingtonae	13.3738	10.3373	8.31115	17.0423	8.33418	6.56516	5.16304	9.95674	5.27465	10.8094	9.34033	10.3939	10.9953	7.72894	14.2554	7.24431	9.40234	5.34372	5.83468	14.1259	5.02149	10.5074	15.3082	9.00929	7.14072	6	9.07479	20.2266	6.04703	1.72633	4.33234	7.30481	19.5421	5.36264	9.23032	15.1224	10.4027	11.1359	13.4222	7.90781	6.25908
Orycteropus_afer	3299.51	3564.47	3193.56	2891.18	3512.86	3506.89	3183.88	3094.89	2930.44	4926.38	3201.07	3404.01	4185.41	3309.09	3271.25	3256.32	3467.58	3015.99	2673.95	3028.38	3053.07	4756.1	3902.21	3796.19	2902.7	2952	2787.98	3884.46	3491.15	3585.58	3080.3	2775.83	3374.77	2986.99	3476.76	3433.74	4822.97	4250.72	3665.37	4393.78	2983.5
Merops_nubicus	114.633	197.348	132.978	155.386	203.146	141.151	160.054	215.729	97.2042	174.752	210.825	107.837	122.217	92.7473	133.551	175.312	161.72	120.768	125.029	91.2753	112.481	216.152	305.469	116.302	118.715	79	181.496	214.787	113.886	151.917	131.414	147.009	178.885	118.872	110.764	208.879	302.98	147.152	162.185	200.661	127.268
Globodera_pallida	5.73163	6.57825	6.23336	6.01494	25.0026	8.75355	8.60507	14.9351	5.27465	8.10704	10.6747	7.79544	8.03504	3.3124	12.0046	2.17329	3.76094	4.27497	5.83468	7.60627	7.03009	18.0127	17.3957	13.9234	8.92591	76	9.07479	27.9319	12.0941	8.63164	2.88823	5.47861	16.5356	10.7253	7.17914	3.78061	20.8055	21.4763	10.0666	9.88476	5.2159
Brachypodium_distachyon	581.76	1864.46	302.318	1528.8	808.416	363.272	908.696	567.534	325.521	397.245	680.51	284.533	356.925	618.315	562.715	241.235	377.974	619.871	715.999	1004.03	359.539	806.818	926.844	459.474	1109.49	463	405.341	1907.08	590.593	763.037	376.914	861.055	502.081	259.194	281.012	1423.4	1273.04	270.442	1187.86	574.305	296.263
Elaeis_oleifera	50.6294	63.903	36.3613	71.1768	60.4228	33.92	55.0725	69.6972	26.3732	65.7571	73.3883	45.4734	37.2149	26.4992	36.764	34.0482	62.0555	35.2685	39.1757	26.0787	33.1419	103.573	71.6704	68.7982	48.1999	18	44.3657	84.7589	37.29	51.7898	38.9911	60.2647	70.6522	30.3883	30.7677	51.0382	113.13	42.1572	54.8072	44.4814	50.0727
Utricularia_gibba	10.508	2.81925	2.07779	4.00996	11.4595	2.18839	6.02355	8.29728	1.50704	5.40469	6.67167	3.89772	4.65187	3.3124	3.75143	1.44886	9.40234	7.48121	3.3341	4.34644	8.03439	8.25581	34.0956	8.19026	4.46295	3	13.108	10.5949	7.05487	5.17898	5.0544	3.65241	13.5291	5.36264	2.05118	6.61607	9.1024	5.56793	4.47406	4.94238	7.30226
Euglena_gracilis	60.1821	15.9758	17.6612	38.0946	17.7101	19.6955	32.6993	26.5513	22.6056	17.1149	8.006	33.7802	25.7967	29.8116	23.2589	25.3551	41.3703	29.9248	25.8393	24.992	31.1333	14.26	31.3123	28.6659	15.174	39	24.1995	19.2634	33.2587	31.0739	33.9367	14.6096	31.568	25.9194	23.5886	13.2321	15.6041	22.2717	14.5407	10.8732	16.6909
Daldinia_sp._EC12	4.77636	13.1565	4.15557	8.01992	5.20887	16.4129	6.88406	4.97837	6.02817	5.40469	5.33733	2.59848	5.49766	1.10413	6.00229	5.79545	3.76094	3.20623	4.16763	2.17322	4.0172	14.26	7.65412	10.6473	7.14072	5	1.00831	11.558	1.00784	10.358	10.1088	4.56551	6.01295	2.68132	5.12796	4.72576	2.60069	2.38626	23.4888	6.91933	7.30226
Philaenus_spumarius	169.083	296.021	117.395	208.518	310.448	194.766	221.15	305.34	101.725	139.621	340.255	98.7422	132.79	96.0597	186.071	146.335	161.72	106.874	125.862	111.921	208.894	499.852	273.461	339.896	184.766	100	188.554	653.029	133.035	182.991	135.025	208.187	242.021	144.791	133.327	248.575	358.895	161.47	285.221	290.612	150.218
Phormia_regina	58.2716	92.0955	41.5557	82.2042	108.344	48.1445	80.8877	122.8	42.1972	54.0469	109.415	32.481	57.0911	49.686	51.0194	44.1903	56.4141	55.5747	45.8439	41.2912	57.245	120.835	95.3286	77.8075	71.4072	51	81.6732	252.35	61.4782	94.948	36.8249	59.3516	166.859	57.2015	47.1772	86.0089	150.84	85.1098	85.0071	70.1818	78.2385
Aeromonas_salmonicida	7.64217	1.8795	3.11668	4.00996	6.25064	6.56516	0.860507	4.97837	4.52112	6.30548	8.006	2.59848	4.65187	1.10413	69.7766	4.34658	33.8484	3.20623	2.50058	2.17322	8.03439	1.50106	0.695829	1.63805	16.9592	5	9.07479	11.558	3.02352	3.45266	1.44411	0	0	1.78755	10.2559	0.945152	9.1024	56.4747	7.8296	6.91933	2.08636
Gadus_morhua	121.319	103.373	126.745	116.289	137.514	103.948	80.8877	101.227	124.331	140.522	158.786	114.333	142.516	197.64	122.297	89.105	174.884	154.968	89.1873	122.787	98.4213	174.873	147.516	104.016	134.781	108	116.964	131.954	202.576	146.738	96.0336	109.572	193.918	87.5897	105.636	105.857	178.147	114.54	90.5996	106.755	117.879
Charadrius_vociferus	164.307	284.744	169.34	112.279	296.905	194.766	239.221	260.535	108.507	212.585	246.852	122.129	96.4205	119.247	246.094	186.179	148.557	187.03	191.711	152.125	255.092	333.985	342.348	190.014	287.414	138	215.778	393.936	138.074	224.423	150.188	216.405	138.298	116.19	165.12	266.533	341.99	266.465	278.51	318.289	260.795
Cyprinodon_variegatus	82.1533	91.1558	59.2169	81.2017	100.01	83.1587	69.7011	87.9512	49.7324	98.1853	118.756	48.0719	55.8224	41.9571	69.7766	58.6789	73.3383	58.7809	57.5133	61.9368	76.3267	100.571	88.3703	58.9699	64.2665	71	74.615	140.623	62.486	150.191	42.6014	72.135	102.22	65.2454	60.5099	110.583	148.239	64.4289	95.0737	99.8361	85.5408
Amynthas_corticis	117.498	176.673	114.278	111.276	130.222	188.201	135.96	146.032	87.4084	140.522	200.15	124.727	125.6	105.997	895.841	137.642	124.111	72.6746	48.3445	111.921	139.598	273.943	265.807	123.673	175.84	128	155.28	565.381	95.7447	196.801	75.0939	136.965	183.395	114.403	109.738	79.3928	327.686	132.835	193.503	247.119	158.563
3300005862_____Ga0080013_1000178	0.955271	6.57825	25.9723	6.01494	15.6266	3.28258	0	1.65946	2.26056	50.4438	1.33433	3.89772	1.26869	0	2.25086	1.44886	5.64141	2.13749	0	4.34644	1.0043	78.0549	50.7955	0.819026	7.14072	0	0	0.96317	0	0	4.33234	7.30481	0	0	1.02559	0	63.7168	10.3404	3.35554	2.96543	10.4318
Pseudomonas_syringae	170.994	333.611	142.328	37.0921	557.349	619.313	295.154	399.929	163.514	312.571	344.258	431.348	466.878	141.329	464.427	525.212	144.796	34.1998	32.5075	196.677	213.916	538.129	283.898	318.601	252.603	140	186.537	605.834	52.4076	250.318	224.56	178.968	214.963	173.392	575.357	69.9413	300.379	186.923	574.916	277.762	256.622
Massilia_timonae	17.1949	4.69875	8.31115	3.00747	22.919	14.2245	8.60507	18.254	12.8099	26.1227	29.3553	22.0871	19.8762	17.6662	136.552	18.1108	13.1633	17.0999	14.1699	8.69289	6.02579	6.00423	2.78332	20.4757	42.8443	22	10.0831	9.6317	144.121	46.6109	12.275	4.56551	22.5486	3.57509	21.5374	7.56122	15.6041	94.6548	19.0147	31.6312	5.2159
Pecoramyces_ruminatium	10.508	6.57825	5.19447	7.01743	13.543	0	2.58152	8.29728	3.7676	3.60313	9.34033	1.29924	3.38318	16.562	21.7583	4.34658	11.2828	12.8249	1.66705	2.17322	9.03869	12.759	9.04578	48.3226	7.14072	7	10.0831	71.2746	8.06271	5.17898	1.44411	1.8262	13.5291	3.57509	2.05118	7.56122	11.7031	14.3175	5.59257	18.781	6.25908
Laparus_doris	23.8818	22.554	25.9723	21.0523	35.4203	17.5071	24.9547	34.8486	14.3169	19.8172	37.3613	11.6932	17.3388	6.62481	12.7549	17.3863	18.8047	24.5811	13.3364	15.2125	16.0688	39.0275	29.9206	36.0372	29.4555	12	25.2078	48.1585	19.1489	31.0739	13.7191	19.1751	33.0712	9.8315	12.3071	24.574	55.9147	16.7038	17.8962	31.6312	23.9931
Arabis_montbretiana	11.4633	13.1565	1.03889	12.0299	16.6684	13.1303	15.4891	8.29728	12.0563	23.4203	16.012	5.19696	19.4533	9.93721	11.2543	13.7642	15.0437	11.7562	15.837	7.60627	10.043	28.5201	20.179	11.4664	9.8185	10	23.1911	25.0424	12.0941	15.537	10.8309	11.8703	30.0648	9.8315	11.2815	6.61607	29.9079	17.4992	10.0666	17.7926	8.34544
Chlorocebus_sabaeus	44801.3	46364.5	40315.3	48885.4	51985.5	49686.2	47886.4	48769.8	41970.4	50694.2	47687.7	48543.5	46929.3	42376.7	43780.7	45279.8	43376.8	43399.5	46395.7	42861.4	47516.4	51619.8	43577.7	57909.3	62038.6	44616	39974.5	40824	46692.2	45537.1	48398	45638.6	46215.5	44068.4	50763.7	45252	49604.2	41759.5	48278.4	42609.2	43770.8
3300007346_____Ga0070753_1000672	3.82109	7.518	21.8168	2.00498	4.16709	6.56516	3.44203	1.65946	0	71.1618	1.33433	1.29924	0.845794	1.10413	0.750286	0.724431	3.76094	5.34372	0.833526	0	2.0086	117.833	86.9786	2.45708	0.892591	1	1.00831	0.96317	0	1.72633	4.33234	2.7393	0	2.68132	0	2.83546	115.731	14.3175	3.35554	1.97695	2.08636
Sorex_araneus	3489.61	3415.99	3172.78	3685.15	3388.89	2813.17	3170.97	3103.18	3101.49	3575.2	3165.04	3472.87	3889.81	3444.9	3089.68	2859.33	3612.38	3296.01	3040.7	3076.19	3440.73	3636.31	3225.86	3504.61	3658.73	3397	3065.26	3180.39	3510.3	3623.56	3214.6	3105.46	3746.07	3189.88	3386.5	3197.45	3716.38	3355.87	2988.67	2785.53	3553.07
Periophthalmus_magnuspinnatus	52.5399	73.3005	56.1002	57.1419	89.5925	41.5793	66.2591	82.9728	30.1408	86.4751	84.063	44.1741	47.3645	40.853	48.0183	51.4346	43.2508	60.9184	35.0081	47.8109	45.1934	111.078	80.0203	72.0743	58.0184	36	62.5153	114.617	60.4703	70.7794	43.3234	66.6564	72.1554	52.7326	37.9469	91.6798	169.045	54.0885	70.4664	70.1818	69.8931
Lingula_anatina	22.9265	31.0118	23.8945	31.0772	34.3785	10.9419	24.0942	46.4648	15.8239	36.9321	50.7047	11.6932	23.6822	12.1455	24.0092	24.6306	43.2508	23.5124	17.504	20.6456	33.1419	54.7886	42.4456	30.304	26.7777	23	30.2493	117.507	26.2038	20.7159	10.8309	29.2193	43.5939	15.1941	24.6142	28.3546	71.5189	21.4763	40.2665	28.6658	35.4681
Pseudodiploria_strigosa	14.3291	2.81925	8.31115	19.0473	12.5013	19.6955	9.46558	11.6162	6.02817	26.1227	12.009	23.3863	29.1799	9.93721	32.2623	19.5596	7.52187	8.54995	5.00115	11.9527	5.02149	12.759	4.8708	28.6659	7.14072	12	10.0831	21.1897	10.0784	8.63164	8.66468	13.6965	24.0518	5.36264	22.563	11.3418	20.8055	11.1359	12.3037	10.8732	6.25908
Oryza_longistaminata	14.3291	12.2168	18.7001	14.0349	15.6266	10.9419	13.7681	14.9351	7.53521	29.7258	26.6867	15.5909	27.9112	13.2496	13.5051	12.3153	28.207	21.3749	20.0046	18.4724	8.03439	25.518	15.3082	14.7425	18.7444	20	17.1413	8.66853	23.1803	15.537	10.8309	16.4358	27.0583	16.0879	18.4606	11.3418	42.9113	19.0901	19.0147	14.8271	16.6909
Heliconius_wallacei	47.7636	60.144	36.3613	45.112	59.3811	30.6374	36.1413	74.6755	22.6056	32.4282	84.063	24.6856	44.4042	19.8744	49.5189	31.1505	47.0117	36.3373	25.0058	36.9448	31.1333	94.5666	53.5788	49.9606	33.9184	35	48.3989	103.059	32.2508	63.8741	24.5499	42.0027	67.6457	36.6447	32.8189	33.0803	102.727	41.3618	52.5702	51.4008	47.9863
3300013739_____Ga0121002_100132	9.55271	6.57825	5.19447	8.01992	15.6266	6.56516	16.3496	4.97837	2.26056	12.611	16.012	16.8901	5.49766	3.3124	4.50172	5.07102	7.52187	6.41246	6.66821	6.51966	8.03439	11.2579	6.26246	22.9327	14.2814	8	7.05817	1.92634	12.0941	6.90531	10.1088	2.7393	9.01943	12.5128	11.2815	9.45152	3.90103	6.36335	6.71108	11.8617	10.4318
Stachybotrys_chlorohalonata	42.9872	103.373	52.9836	63.1569	58.3393	88.6296	93.7953	84.6323	44.4577	39.6344	106.747	45.4734	38.9065	44.1654	75.7789	69.5453	37.6094	29.9248	76.6844	46.7243	63.2708	60.0423	77.237	16.3805	48.1999	34	60.4986	152.181	64.5017	62.1478	44.0455	65.7433	48.1036	57.2015	65.6379	128.541	92.3243	34.203	100.666	85.0089	45.8999
Python_bivittatus	2490.39	4427.16	2654.37	3429.52	4702.56	4887.76	3571.97	3514.73	1797.9	3081.58	4760.9	2758.29	2041.75	1464.08	2893.85	4561.74	1899.27	2227.26	3451.63	1952.64	2983.77	6793.78	7688.91	5373.63	5732.22	2072	3109.63	5026.78	2307.95	2718.97	3767.69	4184.74	2242.83	2363.14	2624.49	3913.88	4968.61	1839.8	5680.93	3594.1	2203.2
Lethenteron_camtschaticum	149.022	187.95	135.056	181.451	236.482	167.412	151.449	170.924	137.894	308.968	181.469	172.799	164.507	109.309	163.562	111.562	173.003	169.93	185.043	107.574	211.907	337.738	222.665	185.919	339.184	93	110.914	289.914	220.717	258.949	154.52	162.532	154.834	126.022	244.091	189.976	434.314	164.652	183.436	145.306	181.513
Phoenicopterus_ruber	276.073	928.473	272.19	2533.29	671.944	764.841	637.636	756.712	203.451	492.728	996.747	271.541	248.241	257.263	578.471	507.102	225.656	327.036	630.979	322.723	406.741	896.881	776.545	791.179	1009.52	288	446.682	1372.52	316.461	441.94	294.599	430.071	342.738	219.868	378.443	816.612	1025.97	277.601	1282.94	945.972	271.227
Bradyrhizobium_sp._th.b2	13.3738	3.759	6.23336	4.00996	14.5848	22.9781	5.16304	18.254	6.02817	26.1227	30.6897	14.2916	6.34346	0	19.5074	6.51988	11.2828	16.0312	11.6694	4.34644	1.0043	6.00423	4.17497	12.2854	18.7444	9	9.07479	3.85268	4.03135	8.63164	7.94263	1.8262	9.01943	1.78755	13.3327	2.83546	19.5051	10.3404	17.8962	19.7695	4.17272
Aureobasidium_subglaciale	21.016	40.4093	17.6612	32.0797	25.0026	25.1664	20.6522	19.9135	24.8662	36.9321	8.006	14.2916	22.4135	18.7703	21.008	26.0795	28.207	24.5811	20.0046	20.6456	20.086	27.019	27.1373	45.0464	55.3406	15	25.2078	42.3795	25.196	36.2529	33.2146	27.393	16.5356	18.7692	21.5374	37.8061	32.5086	15.113	24.6073	14.8271	29.2091
Notamacropus_eugenii	850.191	1143.68	855.009	1133.82	1111.57	942.1	900.091	1093.58	675.908	1331.36	1011.42	932.854	940.1	680.147	853.075	788.181	923.31	881.714	861.032	741.068	919.938	1513.82	1196.13	1271.95	1342.46	811	837.906	1150.99	905.039	1115.21	849.139	970.627	1134.94	806.183	1015.34	1012.26	1577.32	880.529	1049.17	948.937	1029.62
Ciona_intestinalis	8.59744	6.57825	5.19447	7.01743	5.20887	3.28258	8.60507	6.63782	5.27465	7.20626	8.006	3.89772	10.1495	5.52067	12.7549	4.34658	11.2828	4.27497	8.33526	5.43305	5.02149	12.759	11.1333	14.7425	4.46295	6	8.06648	21.1897	3.02352	12.0843	6.49851	7.30481	19.5421	3.57509	3.07677	6.61607	14.3038	4.77251	5.59257	12.8502	12.5182
Patiria_miniata	45.853	62.0235	57.1391	41.1021	69.7988	54.7097	48.1884	92.9295	31.6479	56.7493	92.069	24.6856	43.1355	28.7075	54.7709	39.1193	63.9359	55.5747	40.8428	40.2046	40.172	86.3108	83.4995	58.1509	52.6628	41	62.5153	146.402	45.3527	55.2425	34.6587	51.1337	105.227	32.1758	36.9213	49.1479	131.335	70.7923	73.8219	80.0666	50.0727
Penicillium_paneum	6.6869	30.072	10.3889	17.0423	22.919	14.2245	27.5362	56.4215	9.79577	8.10704	32.024	7.79544	5.49766	3.3124	26.26	12.3153	5.64141	10.6874	15.837	7.60627	13.0559	33.0232	16.6999	9.00929	23.2074	3	46.3823	61.6429	8.06271	20.7159	18.0514	15.5227	6.01295	9.8315	12.3071	30.2449	35.1093	7.95419	17.8962	12.8502	8.34544
Planococcus_maritimus	6.6869	22.554	19.739	11.0274	27.0861	30.6374	18.9312	14.9351	8.28873	15.3133	9.34033	16.8901	20.722	15.4579	12.7549	28.2528	9.40234	6.41246	12.5029	17.3858	10.043	15.0106	21.5707	11.4664	22.3148	9	28.2327	18.3002	8.06271	13.8106	12.997	11.8703	15.0324	13.4066	13.3327	12.287	28.6075	16.7038	32.4369	18.781	9.38862
Solanum_lycopersicum	6.6869	6.57825	5.19447	12.0299	23.9608	21.8839	5.16304	16.5946	6.02817	14.4125	13.3433	31.1818	7.18925	9.93721	12.0046	10.142	15.0437	5.34372	5.00115	3.25983	21.0903	18.0127	15.3082	24.5708	23.2074	11	11.0914	24.0792	6.04703	3.45266	5.0544	17.3489	25.555	23.2381	25.6398	10.3967	37.7099	13.5221	6.71108	40.5275	23.9931
Nannopterum_brasilianus	12.4185	21.6143	23.8945	11.0274	21.8772	20.7897	12.9076	19.9135	14.3169	19.8172	28.021	14.2916	14.3785	7.72894	12.7549	15.9375	31.968	21.3749	10.8358	8.69289	10.043	21.7653	22.9624	13.1044	19.637	15	13.108	14.4475	15.1176	15.537	15.8853	6.39171	28.5615	10.7253	21.5374	8.50637	45.512	25.4534	24.6073	24.7119	9.38862
Tissierellia_bacterium_S7-1-4	13.3738	8.45775	0	8.01992	4.16709	12.0361	11.1866	8.29728	6.02817	5.40469	4.003	1.29924	1.69159	3.3124	3.00114	7.24431	20.6852	3.20623	2.50058	0	4.0172	15.7611	11.1333	22.9327	2.67777	0	3.02493	9.6317	9.07055	5.17898	7.22057	5.47861	0	3.57509	9.23032	5.67091	7.80206	0.795419	4.47406	11.8617	13.5613
Callorhinchus_milii	93.6166	107.132	138.173	108.269	163.558	76.5935	86.9112	144.373	61.7887	254.021	145.442	83.1513	82.042	78.3935	73.528	71.7186	82.7406	91.912	64.1815	88.0155	69.2966	365.507	258.848	116.302	117.822	80	89.7396	140.623	68.533	119.117	54.1543	108.659	126.272	76.8645	67.689	77.5025	439.516	117.722	105.14	100.825	128.311
Chaoborus_trivitattus	12.4185	28.1925	14.5445	17.0423	29.1696	15.3187	17.2101	31.5297	8.28873	16.2141	34.6927	2.59848	23.2593	12.1455	12.7549	20.2841	13.1633	19.2374	13.3364	11.9527	17.0731	36.0254	28.529	18.8376	18.7444	7	17.1413	61.6429	9.07055	15.537	11.5529	16.4358	42.0907	13.4066	10.2559	20.7934	31.2082	21.4763	22.3703	29.6543	10.4318
[truncated: 321 more rows]

## Sheet: Significant
Transcript	ri	FC	fvalue	pvalue	Comparison	UpRegulatedIn
Nakaseomyces_bacillisporus	2.33683	2.52205	0.996716	2.86635e-97	ASDvsControl	ASD
Kwoniella_bestiolae	0.887348	0.904907	0.0413694	3.30167e-64	ASDvsControl	Control
[truncated: 301 more rows]
